# Supplementary material for: Analysis of SARS-CoV-2 known and novel subgenomic mRNAs in cell culture, animal model, and clinical samples using LeTRS, a bioinformatic tool to identify unique sequence identifiers
Source: PubMed Central journal article supplement (PMC9154083; doi:10.1093/gigascience/giac045), 2022-05-26
Supplement: giac045_giga-d-21-00142_original_submission.pdf [file giac045_giga-d-21-00142_original_submission.pdf]

# GigaScience

## Identification and quantification of SARS-CoV-2 leader subgenomic mRNA gene junctions in nasopharyngeal samples shows phasic transcription in animal models of COVID-19 and dysregulation at later time points that can also be identified in humans --Manuscript Draft--

|                                                      |                                                                                                                                                                                                                                                                                                                                                                                                                                                                                                                                                                                                                                                                                                                                                                                                                                                                                                                                                                                                                                                                                                                                                        |                        |
|------------------------------------------------------|--------------------------------------------------------------------------------------------------------------------------------------------------------------------------------------------------------------------------------------------------------------------------------------------------------------------------------------------------------------------------------------------------------------------------------------------------------------------------------------------------------------------------------------------------------------------------------------------------------------------------------------------------------------------------------------------------------------------------------------------------------------------------------------------------------------------------------------------------------------------------------------------------------------------------------------------------------------------------------------------------------------------------------------------------------------------------------------------------------------------------------------------------------|------------------------|
| <b>Manuscript Number:</b>                            | GIGA-D-21-00142                                                                                                                                                                                                                                                                                                                                                                                                                                                                                                                                                                                                                                                                                                                                                                                                                                                                                                                                                                                                                                                                                                                                        |                        |
| <b>Full Title:</b>                                   | Identification and quantification of SARS-CoV-2 leader subgenomic mRNA gene junctions in nasopharyngeal samples shows phasic transcription in animal models of COVID-19 and dysregulation at later time points that can also be identified in humans                                                                                                                                                                                                                                                                                                                                                                                                                                                                                                                                                                                                                                                                                                                                                                                                                                                                                                   |                        |
| <b>Article Type:</b>                                 | Research                                                                                                                                                                                                                                                                                                                                                                                                                                                                                                                                                                                                                                                                                                                                                                                                                                                                                                                                                                                                                                                                                                                                               |                        |
| <b>Funding Information:</b>                          | U.S. Food and Drug Administration<br>Medical Countermeasures<br>(75F40120C00085)                                                                                                                                                                                                                                                                                                                                                                                                                                                                                                                                                                                                                                                                                                                                                                                                                                                                                                                                                                                                                                                                       | Prof. Julian A. Hiscox |
|                                                      | MRC<br>((MR/W005611/1) G2P-UK)                                                                                                                                                                                                                                                                                                                                                                                                                                                                                                                                                                                                                                                                                                                                                                                                                                                                                                                                                                                                                                                                                                                         | Prof. Julian A. Hiscox |
| <b>Abstract:</b>                                     | <p>SARS-CoV-2 has a complex strategy for the transcription of viral subgenomic mRNAs (sgmRNAs), which are targets for nucleic acid diagnostics. Each of these sgRNAs has a unique 5' sequence, the leader-transcriptional regulatory sequence gene junction (leader-TRS-junction), that can be identified using sequencing. High resolution sequencing has been used to investigate the biology of SARS-CoV-2 and the host response in cell culture models and from clinical samples. LeTRS, a bioinformatics tool, was developed to identify leader-TRS-junctions and be used as a proxy to quantify sgmRNAs for understanding virus biology. This was tested on published datasets and clinical samples from patients and longitudinal samples from animal models with COVID-19. LeTRS identified known leader-TRS-junctions and identified novel species that were common across different species. The data indicated multi-phasic abundance of sgmRNAs in two different animal models, with spikes in sgmRNA abundance reflected in human samples, and therefore has implications for transmission models and nucleic acid-based diagnostics.</p> |                        |
| <b>Corresponding Author:</b>                         | Julian Hiscox<br>University of Liverpool<br>Liverpool, UNITED KINGDOM                                                                                                                                                                                                                                                                                                                                                                                                                                                                                                                                                                                                                                                                                                                                                                                                                                                                                                                                                                                                                                                                                  |                        |
| <b>Corresponding Author Secondary Information:</b>   |                                                                                                                                                                                                                                                                                                                                                                                                                                                                                                                                                                                                                                                                                                                                                                                                                                                                                                                                                                                                                                                                                                                                                        |                        |
| <b>Corresponding Author's Institution:</b>           | University of Liverpool                                                                                                                                                                                                                                                                                                                                                                                                                                                                                                                                                                                                                                                                                                                                                                                                                                                                                                                                                                                                                                                                                                                                |                        |
| <b>Corresponding Author's Secondary Institution:</b> |                                                                                                                                                                                                                                                                                                                                                                                                                                                                                                                                                                                                                                                                                                                                                                                                                                                                                                                                                                                                                                                                                                                                                        |                        |
| <b>First Author:</b>                                 | Xiaofeng Dong                                                                                                                                                                                                                                                                                                                                                                                                                                                                                                                                                                                                                                                                                                                                                                                                                                                                                                                                                                                                                                                                                                                                          |                        |
| <b>First Author Secondary Information:</b>           |                                                                                                                                                                                                                                                                                                                                                                                                                                                                                                                                                                                                                                                                                                                                                                                                                                                                                                                                                                                                                                                                                                                                                        |                        |
| <b>Order of Authors:</b>                             | Xiaofeng Dong                                                                                                                                                                                                                                                                                                                                                                                                                                                                                                                                                                                                                                                                                                                                                                                                                                                                                                                                                                                                                                                                                                                                          |                        |
|                                                      | Rebekah Penrice-Randal                                                                                                                                                                                                                                                                                                                                                                                                                                                                                                                                                                                                                                                                                                                                                                                                                                                                                                                                                                                                                                                                                                                                 |                        |
|                                                      | Hannah Goldswain                                                                                                                                                                                                                                                                                                                                                                                                                                                                                                                                                                                                                                                                                                                                                                                                                                                                                                                                                                                                                                                                                                                                       |                        |
|                                                      | Tessa Prince                                                                                                                                                                                                                                                                                                                                                                                                                                                                                                                                                                                                                                                                                                                                                                                                                                                                                                                                                                                                                                                                                                                                           |                        |

|                                                                                                                                                                                                                                                                                                                                                                                                                              |                      |
|------------------------------------------------------------------------------------------------------------------------------------------------------------------------------------------------------------------------------------------------------------------------------------------------------------------------------------------------------------------------------------------------------------------------------|----------------------|
|                                                                                                                                                                                                                                                                                                                                                                                                                              | Nadine Randle        |
|                                                                                                                                                                                                                                                                                                                                                                                                                              | Francisco J Salguero |
|                                                                                                                                                                                                                                                                                                                                                                                                                              | Julia Tree           |
|                                                                                                                                                                                                                                                                                                                                                                                                                              | Ecaterina Vamos      |
|                                                                                                                                                                                                                                                                                                                                                                                                                              | Charlotte Nelson     |
|                                                                                                                                                                                                                                                                                                                                                                                                                              | James P. Stewart     |
|                                                                                                                                                                                                                                                                                                                                                                                                                              | Malcolm G. Semple    |
|                                                                                                                                                                                                                                                                                                                                                                                                                              | John Kenneth Baillie |
|                                                                                                                                                                                                                                                                                                                                                                                                                              | Peter J. Openshaw    |
|                                                                                                                                                                                                                                                                                                                                                                                                                              | Lance Turtle         |
|                                                                                                                                                                                                                                                                                                                                                                                                                              | David A. Matthews    |
|                                                                                                                                                                                                                                                                                                                                                                                                                              | Miles W. Carroll     |
|                                                                                                                                                                                                                                                                                                                                                                                                                              | Alistair C. Darby    |
|                                                                                                                                                                                                                                                                                                                                                                                                                              | Julian A. Hiscox     |
| <b>Order of Authors Secondary Information:</b>                                                                                                                                                                                                                                                                                                                                                                               |                      |
| <b>Additional Information:</b>                                                                                                                                                                                                                                                                                                                                                                                               |                      |
| <b>Question</b>                                                                                                                                                                                                                                                                                                                                                                                                              | <b>Response</b>      |
| Are you submitting this manuscript to a special series or article collection?                                                                                                                                                                                                                                                                                                                                                | No                   |
| <b>Experimental design and statistics</b><br><br>Full details of the experimental design and statistical methods used should be given in the Methods section, as detailed in our <a href="#">Minimum Standards Reporting Checklist</a> . Information essential to interpreting the data presented should be made available in the figure legends.<br><br>Have you included all the information requested in your manuscript? | Yes                  |
| <b>Resources</b><br><br>A description of all resources used, including antibodies, cell lines, animals and software tools, with enough information to allow them to be uniquely identified, should be included in the Methods section. Authors are strongly encouraged to cite <a href="#">Research Resource Identifiers</a> (RRIDs) for antibodies, model organisms and tools, where possible.                              | Yes                  |

|                                                                                                                                                                                                                                                                                                                                                                                                                                                                                                                                                         |            |
|---------------------------------------------------------------------------------------------------------------------------------------------------------------------------------------------------------------------------------------------------------------------------------------------------------------------------------------------------------------------------------------------------------------------------------------------------------------------------------------------------------------------------------------------------------|------------|
| <p>Have you included the information requested as detailed in our <a href="#">Minimum Standards Reporting Checklist</a>?</p>                                                                                                                                                                                                                                                                                                                                                                                                                            |            |
| <p><b>Availability of data and materials</b></p> <p>All datasets and code on which the conclusions of the paper rely must be either included in your submission or deposited in <a href="#">publicly available repositories</a> (where available and ethically appropriate), referencing such data using a unique identifier in the references and in the “Availability of Data and Materials” section of your manuscript.</p> <p>Have you have met the above requirement as detailed in our <a href="#">Minimum Standards Reporting Checklist</a>?</p> | <p>Yes</p> |

Identification and quantification of SARS-CoV-2 leader subgenomic mRNA gene junctions in nasopharyngeal samples shows phasic transcription in animal models of COVID-19 and dysregulation at later time points that can also be identified in humans

Xiaofeng Dong<sup>1</sup>, Rebekah Penrice-Randal<sup>1</sup>, Hannah Goldswain<sup>1</sup>, Tessa Prince<sup>1</sup>, Nadine Randle<sup>1</sup>, Francisco J. Salguero<sup>2</sup>, Julia Tree<sup>2</sup>, Ecaterina Vamos<sup>1</sup>, Charlotte Nelson<sup>1</sup>, James P. Stewart<sup>1</sup>, Malcolm G. Semple<sup>1,3</sup>, J. Kenneth Baillie<sup>4</sup>, Peter J. M. Openshaw<sup>5</sup>, Lance Turtle<sup>1</sup>, David A. Matthews<sup>6</sup>, Miles W. Carroll<sup>2</sup>, Alistair C. Darby<sup>1</sup> and Julian A. Hiscox<sup>1,3,7</sup>.

<sup>1</sup>Institute of Infection, Veterinary and Ecological Sciences, University of Liverpool, UK.

<sup>2</sup>Public Health England, Salisbury, UK.

<sup>3</sup>NIHR Health Protection Research Unit in Emerging and Zoonotic Infections, Liverpool, UK.

<sup>4</sup>The Roslin Institute, University of Edinburgh, UK.

<sup>5</sup>National Heart and Lung Institute, Imperial College London, UK.

<sup>6</sup>University of Bristol, UK.

<sup>7</sup>Infectious Diseases Horizontal Technology Centre (ID HTC), A\*STAR, Singapore.

Corresponding author: [julian.hiscox@liverpool.ac.uk](mailto:julian.hiscox@liverpool.ac.uk)

## **Abstract**

SARS-CoV-2 has a complex strategy for the transcription of viral subgenomic mRNAs (sgmRNAs), which are targets for nucleic acid diagnostics. Each of these sgRNAs has a unique 5' sequence, the leader-transcriptional regulatory sequence gene junction (leader-TRS-junction), that can be identified using sequencing. High resolution sequencing has been used to investigate the biology of SARS-CoV-2 and the host response in cell culture models and from clinical samples. LeTRS, a bioinformatics tool, was developed to identify leader-TRS-junctions and be used as a proxy to quantify sgmRNAs for understanding virus biology. This was tested on published datasets and clinical samples from patients and longitudinal samples from animal models with COVID-19. LeTRS identified known leader-TRS-junctions and identified novel species that were common across different species. The data indicated multi-phasic abundance of sgmRNAs in two different animal models, with spikes in sgmRNA abundance reflected in human samples, and therefore has implications for transmission models and nucleic acid-based diagnostics.

## **Importance**

When infecting cells SARS-CoV-2 not only replicates its genome but also makes molecules called subgenomic mRNAs (sgmRNAs) that are used to make many of the viral proteins, including the spike glycoprotein. The sgmRNAs can only be found in infected cells, and therefore their presence and ratio in a clinical sample is indicative that viral RNA synthesis has occurred, and infected cells are present. Many of the sgmRNAs are targets for diagnostic assays. We have developed a rapid informatics methodology to identify these unique molecules from sequencing data. We used this to follow their pattern of abundance in nasopharyngeal samples taken from non-human primate models and clinical samples from humans. The data indicates that SARS-CoV-2 RNA synthesis

(and by inference infection) may occur in waves and this has implications for diagnostics and modelling of disease spread.

## Introduction

Various sequencing approaches are used to characterise SARS-CoV-2 RNA synthesis in cell culture<sup>1, 2</sup>, ex vivo models<sup>3</sup> and clinical samples. This can include nasopharyngeal swabs from patients with COVID-19<sup>4</sup> to post-mortem samples from patients who died of severe disease<sup>5</sup>. Bioinformatic interrogation of this data can provide critical information on the biology of the virus. SARS-CoV-2 genomes are message sense, and the 5' two thirds of the genome is translated and proteolytically cleaved into a variety of functional subunits, many of which are involved in the synthesis of viral RNA<sup>6</sup>. The remaining one third of the genome is expressed through a nested set of subgenomic mRNAs (sgmRNAs). These have common 5' and 3' ends with the coronavirus genome, including a leader sequence. Many studies have shown that the sgmRNA located towards the 3' end of the genome, which encodes the nucleoprotein, generally has a higher abundance than those located immediately after the 1a/b region and the genome itself<sup>7, 8</sup>. However, there is not necessarily a precise transcription gradient of the sgmRNAs. The 5' leader sequence on the sgmRNAs is immediately abutted to a short sequence called a transcriptional regulatory sequence (TRS) that is involved in the control of sgmRNA synthesis<sup>9, 10</sup>. These TRSs are located along the genome and are proximal to the start codons of the open reading frames<sup>11</sup>. In the negative sense the TRSs are complementary to a short portion of the genomic leader sequence. The TRS is composed of a short core motif that is conserved and flanking sequences<sup>9, 10, 12</sup>. For SARS-CoV-2 the core motif is ACGAAC.

The prevailing thought is that synthesis of sgmRNAs involves a discontinuous step during negative strand synthesis<sup>13, 14</sup>. A natural consequence of this is recombination resulting in insertions and

deletions in the viral genome and the formation of defective viral RNAs. Thus, the identification of the leader/sgmRNA complexes by sequencing provides information on the abundance of the sgmRNAs and evidence that transcription has occurred in the tissue being analysed. In terms of clinical samples, if infected cells are present, then leader/sgmRNA 'fusion' sequence can be identified, and inferences made about active viral RNA synthesis from the relative abundance of the sgmRNAs. In the absence of human challenge models, the kinetics of virus infection are unknown, and most studies will begin with detectable viral RNA on presentation of the patient with clinical symptoms. In general, models of infection of humans with SARS-CoV-2 assume an exponential increase in viral RNA synthesis followed by a decrease as antibody levels increase<sup>15</sup>.

In order to investigate the presence of SARS-CoV-2 sgmRNAs in clinical (and other) samples, a bioinformatics tool (LeTRS), was developed to analyse sequencing data from SARS-CoV-2 infections by identifying the unique leader-TRS gene junction site for each sgmRNA. The utility of this tool was demonstrated on cells infected in culture, nasopharyngeal samples from human infections and longitudinal analysis of nasopharyngeal samples from two non-human primate models for COVID-19. The results have implications for diagnostics and disease modelling.



## Results

A tool, LeTRS (named after the leader-TRS fusion site), was developed to detect and quantify defined leader gene junctions of SARS-CoV-2 (and other coronaviruses) from multiple types of sequencing data. This was used to investigate SARS-CoV-2 sgmRNA synthesis in humans and non-human primate animal models. LeTRS was developed using the Perl programming language, including a main program for the identification of sgmRNAs and a script for plotting graphs of the results. The tool accepts FastQ files derived from Illumina paired-end or Oxford Nanopore amplicon cDNA, Nanopore direct RNA sequencing, or BAM files produced by a splicing alignment method with a SARS-CoV-2 genome (Supplementary Figure 1). (Note that SARS-CoV-2 sgmRNAs are not formed by splicing, but this is the apparent observation from sequencing data as a result of the discontinuous nature of transcription). By default, LeTRS analyses SARS-CoV-2 sequence data by using 10 known leader-TRS junctions and an NCBI reference genome (NC\_045512.2). However, given the potential heterogeneity in the leader-TRS region and potential novel sgmRNAs, the user can also provide customize leader-TRS junctions and SARS-CoV-2 variants as a reference. The tool was designed to investigate very large data sets that are produced during sequencing of multiple samples. As there is some heterogeneity in the leader-TRS sites, LeTRS was also designed to search the leader-TRS junction in a given interval, report 20 nucleotides at the 3' end of the leader sequence, the TRS and translated first orf of the sgmRNA, and find the conserved ACGAAC sequences in the TRS.

**Combinations of read alignments with the leader-TRS junction that are considered for identifying leader-TRS junction sites**

Various approaches have been used to sequence the SARS-CoV-2 genome and in most cases, this would also include any sgRNAs as they are 3' co-terminal and share common sequence extending from the 3' end. Methods such as ARTIC<sup>16</sup> and RSLA<sup>4</sup> use primer sets to generate overlapping amplicons that span the entire genome, and also amplify sgRNA. Included is a primer to the leader sequence, so that the unique 5' end of these moieties are also sequenced. Primer sets of ARTIC and RSLA are generally pooled. Unbiased sequencing can also be used in methodologies to identify SARS-CoV-2 sequence. Data in the GISAID database have been generated by Oxford Nanopore (minority) or Illumina (majority) based approaches. These can give different types of sequencing reads derived from the sgRNAs that can be mapped back on the reference SARS-CoV-2 genome by splicing alignment (Figure 1A). For example, there are a number of different types of reads that can be derived from mapping Illumina-based amplicon sequencing onto the reference viral genome (Figure 1B and 1C). During the PCR stage, the extension time allows the leader-TRS region on the sgRNAs to be PCR-amplified by the forward primer and the reverse primer before and after leader-TRS junction in different primer sets, respectively. Both of these forward and reverse and primers would be detected at both ends of each paired read (Figure 1B pink lines) if the amplicon had a length shorter than the Illumina read length (usually 100-250 nts). If the amplicon was longer than the Illumina read length, primer sequence would be only found at one end of each paired read (Figure 1B green lines). The extension stage could also proceed with a single primer using cDNA from the sgRNA as template. This type of PCR has a very low amplification efficiency, but theoretically could also generate the same Illumina paired end reads with just one primer sequence at one end (Figure 1C). These paired end reads could include the full length of the leader sequence but might not reach the 3'

end of the sgmRNA, because of the limitation of Illumina sequencing length and extension time (Figure 1C). Also, unless there are cryptic TRSs, all sgmRNAs would be expected to be larger than the Illumina sequencing length.

In contrast, the different types of read alignment in the Nanopore based cDNA sequencing are simpler to assign. The longer reads that tend to be generated by Nanopore sequencing (depending on optimisation) enable the capture of full-length sequences of all amplicons. Provided the leader sequence is included as a forward primer most of the reads spanning the leader-TRS junction would contain the forward and reverse primer sequences at both ends (Figure 1D pink lines). If the extension time allowed, single primer PCR amplification could take the Nanopore cDNA sequencing reads to both the 3' and 5' ends of the sgmRNAs, and these types of reads would only have a primer sequence at one end (Figure 2D brown lines). In the Nanopore direct RNA sequencing approach, the full length sgmRNA could be sequenced and mapped entirely on the leader and TRS-orf regions (Figure 1E).

### **Evaluation of LeTRS on SARS-CoV-2 infection in cell culture.**

In order to assess the ability of LeTRS to identify the leader-TRS junctions from sequencing information, the tool was first evaluated on sequence data obtained from published SARS-CoV-2 infections in cell culture and our laboratory experiments conducted for this study. First, published data was used from sequencing viral RNA at 72 hrs post-infection in a cell culture model<sup>16</sup>. SARS-CoV-2 was sequenced using Nanopore from an amplicon-based approach (ARTIC)<sup>16</sup> (Figure 2A, Table 1 and 2, Supplementary Tables 1 and 2). All of the major known leader-TRS gene junctions

were identified. Interestingly, the nucleoprotein gene leader-TRS was approximately the same abundance as the membrane leader-TRS, whereas the other leader-TRSs were much lower. Two potential novel leader-TRS gene junctions were identified at positions 21,055 and 28,249 (Figure 2A, Table 2, Supplementary Table 2). The former is within the orf1b region and the latter within orf8. Second, data was analysed from a published experiment of cells infected (Figure 2B, Table 3 and 4, Supplementary Tables 3 and 4) and control sample (Tables 5 and 6) in culture using a direct RNA sequencing approach<sup>2</sup>. Analysis demonstrated a more expected pattern of abundance of the leader-TRS gene junctions (Figure 2B, Table 3 and Supplementary Table 3). The leader-TRS nucleoprotein gene junction was most abundant, and in general, the pattern of abundance of the leader-TRS gene junctions for the major structural proteins followed the order of the gene junction along the genome. Novel low abundance leader-TRS gene junctions were also identified. One of these low abundance leader-TRSs gene junctions was also common to those found by the ARTIC amplicon analysis (Figure 2A and B, Table 2 and 4, Supplementary Table 2 and 4). Third, LeTRS was evaluated on sequencing data obtained from VeroE6 cells infected in culture with SARS-CoV-2 (SCV2-006). Here viral RNA, that had been prepared at 24 hrs post-infection, was amplified using the ARTIC approach and sequenced by Illumina (Figure 2C, Table 7 and 8, Supplementary Tables 5 and 6). As would be predicted the major leader-TRS gene junctions were identified, with the nucleoprotein one being the most abundant. Novel potential leader-gene junctions were also identified, including three that were greater in abundance than the other leader-gene junction. Some of the novel leader-TRS gene junctions from these three cell culture data sets shared the same first orf with the known sgRNAs (Supplementary Tables 2, 4 and 6).

### **Comparison with other informatic tools that can identify leader TRS gene junctions.**

Periscope v0.08a is another tool that was developed to identify sgRNA from Illumina and Nanopore ARTIC amplicon sequencing data<sup>17</sup>. The tool functions based on searching a 32 nt leader sequence (genomic position: 34-65) and anchoring the known TRS-orf boundaries on the reads for identification of known sgRNAs. Periscope does not take into consideration the sequences and distance between the leader and TRS-orf boundaries. Periscope can analyse ARTIC amplicon sequencing data, whereas LeTRS can also input a variety of different amplicon and direct RNA sequencing data. Given the very large sequencing datasets being generated as part of the global effort to sequence SARS-CoV-2 the performance of LeTRS was compared to Periscope in terms of computation time. Illumina sequencing data from a nasopharyngeal sample of a human patient with COVID-19 and Nanopore ARTIC amplicon published cell culture data sets were used for comparison. This used the number of reads with at least one primer sequence at either end in the LeTRS and the number of “High Quality” reads (the reads with both 32 nts leader sequences and known TRS-orf boundary) in Periscope. Periscope was run with the default setting<sup>17</sup>. Both LeTRS and Periscope identified a similar number of reads for both data sets (Supplementary Figure 2, Tables 1 and 3 and Supplementary table 7). With 16 CPU cores, the run times for LeTRS was 1m 40.692s and 2m 14.911s for these tested Illumina and Nanopore data sets, respectively, and for Periscope these were 7m 31.183s and 16m 49.448s. We also tested the data from ARTIC Illumina cell culture data, but Periscope had an error.

**Analysis of sequencing data from longitudinal nasopharyngeal samples taken from two non-human primate models of COVID-19 indicated multi-phasic sgRNA synthesis.**

Part of the difficulty of studying SARS-CoV-2 and the disease COVID-19 is establishing the sequence of events from the start of infection. Most samples from humans are from nasopharyngeal aspirates taken when clinical symptoms develop. This tends to be 5 to 6 days post-exposure. In the absence of a human challenge model, animal models can be used to study the kinetics of SARS-CoV-2<sup>18, 19</sup>. Two separate non-human primate models, cynomolgus and rhesus macaques, were established for the study of SARS-CoV-2 that mirrored disease in the majority of humans<sup>18</sup>. To study the pattern of sgRNA synthesis over the course of infection, nasopharyngeal samples were sequentially gathered daily from one day post-infection up to 18 days post-infection from the two NHP models. RNA was purified from these longitudinal samples as well as the inoculum virus and viral RNA sequenced using the ARTIC approach on the Illumina platform.

Analysis of the sequence data from the inoculum used to infect the NHPs indicated that leader gene junctions could be identified (Supplementary Figure 3, Supplementary\_Table\_8), but these did not follow the pattern of abundance of leader TRS-gene junctions found in infected cells in culture, where the leader TRS-N gene junction was most abundant (Figure 1C). In contrast, analysis of the longitudinal sequencing data from nasopharyngeal aspirates from the non-human primate model identified leader TRS-gene junctions associated with the major sgRNAs (Figure 3, Supplementary\_Table\_9) as well as novel leader-TRS gene junction sites (Supplementary Figures 4 and 5). Analysing the abundance of the leader TRS-gene junctions for both model species over the course of infection revealed a phasic nature of sgRNA synthesis. The leader TRS nucleoprotein gene junction was the most abundant, and there was a similar phasic pattern

of potential sgRNA synthesis with Illumina ARTIC method (Figure 3). For both species, viral load and hence sgRNA synthesis had dropped by Day 8 and Day 9.

### **Analysis of leader TRS-gene junction in human samples revealed expected and aberrant abundances**

To investigate the pattern of leader-TRS gene junction abundance during infection of SARS-CoV-2 in humans, nasopharyngeal swabs from patients with COVID-19 were sequenced by the ARTIC approach using either Illumina (as part of COG-UK) (N=15 patients) (Figure 4, Supplementary Table 7) or by Oxford Nanopore (as part of ISARIC-4C) (N=15 patients) (Figure 5, Supplementary Table 10). In a number of samples, leader-TRS gene junctions were identified, and followed an expected pattern, with the nucleoprotein gene junction being the most abundant (e.g., Sample 1 in Figures 4A and B, Patient 2 day1 in Figure 5A and B). However, in several of the samples there was very large representation of single leader-TRS gene junction (e.g., Sample 4 and 5 in Figures 4A and B). These tended to map to the nucleoprotein gene (Sample 5, 8 and 13 Figures 4A and B). The heterogeneity in abundance of leader gene junctions was reminiscent for that from the non-human primate study with a defined and expected pattern near the start of infection but then becoming phasic. The samples gathered under ISARIC-4C were from hospitalised patients and permitted analysis in relation to reported date of symptom onset and sequential sampling. In general, the data indicated that on first sample on admission to hospital contained an abundance of leader-TRS gene junctions which resembled the pattern seen in infected cells (Patient 6 day1 and day9 in Figures 5A and B). However, with further days post-sample, e.g.

(Patient 7 day7 Figures 5A and B), the leader-TRS N gene junction was the most abundant and far exceeded any other detectable species. The abundance of leader-TRS N gene junction in the patients at a later stage of infection followed that observed in the NHP model (Figure 3).

### **Commonality of novel leader-TRS gene junctions**

The sequencing data spanning cell culture infection, animal models and clinical samples from humans indicated the presence of novel leader-TRS gene junctions. Their detection generally increased with depth of coverage. Coronavirus replication and transcription is promiscuous, and recombination is a natural result of this, resulting in insertions, deletions and potential gene rearrangements. Many of these novel leader-TRS junctions were centred around the known gene open reading frame but out of the search interval. These type of leader-TRS gene junctions could be only found with spike, membrane, ORF6, ORF7b and nucleocapsid orfs, in which the membrane orf was the most common (Figure 6A). In order to define what might be genuine novel leader-TRS gene junctions, these were compared across the data in all Illumina ARTIC data (Figure 6B, Supplementary Table 11). This identified 5 novel leader-TRS junctions that were common to all the data, the majority of these being focused on the membrane orf.



## Discussion

Coronavirus sgmRNAs are only synthesised during infection of cells and therefore their presence in sequence data can be indicative of active viral RNA synthesis. The abundance of the sgmRNAs in infected cells should follow a general pattern where the sgmRNA encoding the nucleoprotein is the most abundant. Identification and quantification of the unique leader-TRS gene junctions for each sgmRNA can be used as a proxy for their abundance.

LeTRS was developed to interrogate sequencing datasets to identify the leader-gene junctions present at the 5' end of the sgmRNAs. LeTRS was first evaluated and validated on cell culture data from published datasets<sup>2, 16</sup> and from a cell culture experiment as part of this study and then used in an analysis of nasopharyngeal samples from non-human primate and human clinical samples. The results showed that the positions of the leader-TRS junction sites with peak read counts were same as the given reference positions. The exception was at leader-gene junction for orf7b in the Nanopore sequencing. The normalized count results confirmed the reads spanning the junctions showed that the leader-TRS nucleoprotein gene junction was the most abundant, and orf7b and orf10 were the most infrequent in line with other data<sup>2, 20</sup>. Several low abundant leader-TRS junctions were identified in all of the datasets with the implication these were either from potential lower abundant novel sgmRNAs, or represented known sgmRNAs, but with different leader-TRS junctions. Likewise, at low frequency these could represent an aberrant viral transcription process or artefacts of the different sequencing processes – although this latter possibility is less likely through the published direct RNA sequencing approach<sup>2</sup> (Figure 2B). Traditionally, such sgmRNAs have been first identified in coronaviruses by either northern blot

and/or metabolic labelling<sup>8</sup>. Several other groups have identified novel leader-TRS gene junctions and potential subgenomic mRNAs for other coronaviruses, including avian infectious bronchitis virus<sup>21</sup>. The best way of validating potential novel sgmRNAs would be through matching proteomic data to confirm genuine open reading frames<sup>1</sup>. Analysis of several published sequencing datasets identified novel viral RNA molecules that the authors suggested were sgmRNAs containing only the 5' region of orf1a<sup>22</sup>. Such species are likely to be defective RNAs, that act as templates for replication. Interestingly, they hypothesize that at later time points post-infection in cell culture potential novel sgRNAs are generated non-specifically<sup>22</sup>, which potentially ties in with a disconnect of leader-TRS gene junctions observed in our study both *in vivo* from the nasopharyngeal samples from latter time points in the NHP models and in humans and from the published data from SARS-CoV-2 infections in cell culture gathered at later time points compared to earlier time points<sup>2, 16</sup>.

Advanced filtering can improve the confidence of the identified leader-TRS junction in the sequencing reads. Amplicon sequencing provided a unique opportunity to filter the sequencing reads. The reads spanning the junctions with the correct forward primer, reverse primer or both primer sequences at the ends of reads proved the known/novel sgmRNA existing in tested Illumina and Nanopore ARTIC v3 primers amplicon sequencing data (Tables 1 and 3). For Illumina sequencing, the same junction on paired reads with at least a primer provided extra evidence for leader-TRS identification. Some reads were identified that did not have primer sequences and these were likely to be miss-mapped, from template sgmRNA or low-quality sequence. These were present at very low abundance compared to authentic mapped reads (Tables 1, 3 and 5).

No reads with polyA were detected in the Nanopore amplicon sequencing data, this was likely because the limited PCR extension time restricted the primers to reach the 5' end of subgenomic mRNA (Table 1 and Supplementary Table 5). The Nanopore direct RNA sequencing had the potential to generate full length mRNA sequences. The polyA sequences and leader-TRS junctions in the reads can be good signals to prove the full length sgmRNA in the test data (Tables 3 and 4). Because the fortuitous sequencing of some host mRNA may lead to a false positive result, LeTRS was tested against sequence data from uninfected control cells<sup>2</sup>. No positive reads were found in this control sample (Tables 5 and 6), suggesting the LeTRS could effectively screen out or not recognise any false positives. Crucially, LeTRS used less CPU runtime and provided more detailed information than other tools to investigate this<sup>17</sup>, and therefore is suited for the high throughput analysis of large amounts of diverse sequencing data.

In terms of clinical samples (typically nasopharyngeal swabs), the presence of sgmRNAs will be due to the presence of infected cells. In general, this has been seen as indicative of active viral RNA synthesis at the time of sampling<sup>5, 23, 24</sup>, although these have also been postulated to be present through resistant structures after infection has finished<sup>25</sup>. Analysis of inoculum indicated that leader-TRS gene junctions could be identified (Supplementary Figure 3) but that these were not in the same ratio as found in cells infected in culture (e.g., Figure 2B and 2C). Thus, if the abundance of leader-TRS gene junctions follows an expected pattern of the nucleoprotein gene leader-TRS gene junction being the most abundant followed by a general gradient in sequence data from nasopharyngeal samples, then this may be indicative of an active infection – and the presence of infected cells in a sample.

In the absence of a human challenge model, NHP models that closely resemble COVID-19 disease in humans can be used to study SARS-CoV-2 infection, from a very defined initial exposure. RNA was sequenced from longitudinal nasopharyngeal samples from two NHP models, rhesus and cynomolgus macaques<sup>18</sup>. LeTRS used to identify the abundance of the leader-TRS gene junctions in this data. The analysis indicated a phasic pattern of sgmRNA synthesis with a large drop off after Day 8/9 post-infection in both NHP models. This phasic pattern may be explained by an initial synchronous infection of respiratory epithelial cells and then these cells dying. Released virus then goes on to infect new epithelial cells with virus infection increasing exponentially in waves but becoming asynchronous. The decline in sgmRNA from Day 8/9 overlaps with IgG seroconversion and humoral immunity in both species<sup>18</sup> and follows similar kinetics to serology profiles measured in patients with COVID-19.

The identification of sgmRNAs in nasopharyngeal samples and their kinetics has implications for nucleic acid-based diagnostics (many of which have three targets, one in the orf1a/b region and two which are shared between the genome and sgmRNAs – the nucleoprotein and the spike genes). The phasic nature of leader-TRS gene junctions in the longitudinal samples, and by implication sgmRNAs, and overt abundance of the leader-TRS nucleoprotein gene junction found in many of the human samples, suggests that it may not be possible to precisely identify where in infection an individual is based on the abundance of sgmRNAs. Likewise, assuming equivalency between the targets, if the nucleoprotein target is found to be more abundant than the spike target than the genomic target, then this would suggest infected cells are present in the sample.

Decreases in Ct values associated with emerging variants could equally be explained by sloughed cells being present in a nasopharyngeal sample as well as by increases in the amount of virions/viral load. Therefore, we would caution that a decrease in Ct associated with RT-qPCR based assays may not just be reflective of higher viral loads but also may be indicative of more infected cells being present. These possibilities may be resolved by considering the relative ratios of sgRNAs identified.

## **METHODS**

### **Data input**

LeTRS was designed to analyse FastQ files derived from Illumina paired-end or Nanopore sequencing data derived from a SARS-CoV-2 amplicon protocol, or standard Nanopore SARS-CoV-2 direct RNA sequencing data (Figure 1). The Illumina/Nanopore FastQ sequencing data were cleaned to remove adapters and low-quality reads before input. Sequencing data derived from other sequencing modes or platforms can also be analysed by LeTRS via input of a BAM file produced by a custom splicing alignment method with a SARS-CoV-2 genome (NC\_045512.2) as a reference (Figure 1). This can also be rapidly adapted for other coronaviruses.

### **Library preparations and sequencing**

We sequenced the 15 samples from human patients with nanopore. Total RNA was isolated using a QIAamp Viral RNA Mini Kit (Qiagen, Manchester, UK) by spin-column procedure according to the manufacturer's instructions. Clinical samples were extracted with Trizol LS as described<sup>4</sup>. All RNA samples were treated with Turbo DNase (Invitrogen). SuperScript IV (Invitrogen) was used to generate single-strand cDNA using random primer mix (NEB, Hitchin, UK). ARTIC V3 PCR amplicons from the single-strand cDNA were generated following the Nanopore Protocol of PCR tiling of SARS-CoV-2 virus (Version: PTC\_9096\_v109\_revL\_06Feb2020). Amplicons generated by ARTIC PCR were purified and normalised to 200 fmol before DNA end preparation and barcode and adapter ligation. Library was loaded onto a FLO-MIN106 flow cell and sequencing reads were called with Guppy using the high-accuracy calling parameters.

The NHP samples and their inoculum, and our laboratory experiments conducted in cells were sequenced with Illumina. The amplicons products for Illumina sequencing were prepared as per the Nanopore sequencing above and then used in Illumina NEBNext Ultra II DNA Library preparation. Following 4 cycles of amplification the library was purified using Ampure XP beads and quantified using Qubit and the size distribution assessed using the Fragment analyzer. Finally, the ARTIC library was sequenced on the Illumina® NovaSeq 6000 platform (Illumina®, San Diego, USA) following the standard workflow. The generated raw FastQ files (2 x 250 bp) were trimmed to remove Illumina adapter sequences using Cutadapt v1.2.1<sup>26</sup>. The option “-O 3” was set, so the that 3’ end of any reads which matched the adapter sequence with greater than 3 bp was trimmed off. The reads were further trimmed to remove low quality bases, using Sickle v1.200<sup>27</sup> with a minimum window quality score of 20. After trimming, reads shorter than 10 bp were removed.

The LeTRS was also tested with a combined Nanopore cDNA ARTIC v3 amplicon dataset of 7 published viral cell culture samples (barcode01-barcode07)<sup>16</sup>, and a dataset from a published direct RNA Nanopore sequencing analysis Vero cells infected with SARS-CoV-2 or an uninfected negative control<sup>2</sup>.

### **Sequencing data alignment and basic filtering**

LeTRS controlled Hisat2 v2.1.0<sup>28</sup> to map the paired-end Illumina reads against the SARS-CoV-2 reference genome (NC\_045512.2) with the default setting, and Minimap2 v2.1<sup>29</sup> to align the Nanopore cDNA reads and direct RNA-seq reads on the viral genome using Minimap2 with “-ax

splice” and “-ax splice -uf -k14” parameters, respectively. LeTRS provided 10 known leader-TRS junctions to improve alignment accuracy by using “--known-splicesite-infile” function in Hisat2 and “--junc-bed” function in Minimap2, but this application could be optionally switched off by users. In order to remove low mapping quality and mis-mapped reads before searching the leader-TRS junction sites, LeTRS used Samtools v1.9<sup>30</sup> to have basic filtering for the reads in the output Sam/Bam files according to their alignment states as shown (Table 9 - basic filtering).

### **Search leader-TRS**

After the mapping and basic filtering step, LeTRS searched aligned reads spanning the leader-TRS junctions in the SARS-CoV-2 reference genome (Supplementary Figure 1). For the known leader-TRS junctions, LeTRS searched the reads including the leader-TRS junctions within a given interval around the known leader and TRS junctions sites. The leader break site interval is  $\pm 10$  nts, and the TRS breaking sites interval is -20 nts to the 1 nt before the first known AUG in the default setting (the intervals can be changed to custom values to investigate heterogeneity). LeTRS then reported a peak count that was the number of reads carrying the most common leader-TRS junctions within the given leader and TRS breaking sites intervals, and a cluster count that was the number of all reads carrying leader-TRS junctions within the given leader and TRS breaking sites intervals (Tables 1-6). LeTRS also searched the junctions out of the given intervals (the genomic position of leader breaking site  $< 80$ ) and reported the number of reads ( $> 10$  by default) with novel leader-TRS junctions. These number of read counts were also reported by number of reads in 1000000 as normalization. The read including the known and novel leader-TRS junctions could be optionally outputted in FastA format. Based on identified known and novel leader-TRS



junctions, LeTRS could report 20 nucleotides towards the 3' end of the leader sequence, the TRS and translated the first orf of sgmRNAs sequence, and find the conserved ACGAAC sequences in the TRS (Table S1-S6).

### **Advance filtering**

Based on the alignment possibilities illustrated in Figure 2 and discussed, LeTRS further filters the identified reads with known and novel leader-TRS junctions. This step is named as advance filtering and can only applied when the input data is from Illumina paired end reads, Nanopore cDNA reads or Nanopore RNA reads (Table 9). If a BAM file is used as input data, the advanced filtering step would be automatically skipped (Table 9). The number of reads including the known and novel leader-TRS junctions, and the number of reads filtered with corresponding advance filtering criteria were outputted into two tables in tab format (Tables 1-6).

### **Leader-TRS junction plotting**

LeTRS-plot was developed as an automatic plotting tool that interfaces with the R package ggplot2 v3.3.3 to view the leader-TRS junctions in the tables generated by LeTRS (Figure 3-5). The plot shows peak count, filtered peak count, normalized peak count and normalized filtered peak count for known leader-TRS junctions, and novel junction counts, filtered novel junction count, normalized novel junction count and filtered normalized novel junction for novel leader-TRS junctions.

## References

1. Davidson, A.D. et al. Characterisation of the transcriptome and proteome of SARS-CoV-2 reveals a cell passage induced in-frame deletion of the furin-like cleavage site from the spike glycoprotein. *Genome Med* **12**, 68 (2020).
2. Kim, D. et al. The Architecture of SARS-CoV-2 Transcriptome. *Cell* **181**, 914-921 e910 (2020).
3. Nasir, J.A. et al. A Comparison of Whole Genome Sequencing of SARS-CoV-2 Using Amplicon-Based Sequencing, Random Hexamers, and Bait Capture. *Viruses* **12** (2020).
4. Moore, S.C. et al. Amplicon-Based Detection and Sequencing of SARS-CoV-2 in Nasopharyngeal Swabs from Patients With COVID-19 and Identification of Deletions in the Viral Genome That Encode Proteins Involved in Interferon Antagonism. *Viruses* **12** (2020).
5. Dorward, D.A. et al. Tissue-Specific Immunopathology in Fatal COVID-19. *Am J Respir Crit Care Med* **203**, 192-201 (2021).
6. Graham, R.L., Sparks, J.S., Eckerle, L.D., Sims, A.C. & Denison, M.R. SARS coronavirus replicase proteins in pathogenesis. *Virus Res* **133**, 88-100 (2008).
7. Pyrc, K., Jebbink, M.F., Berkhout, B. & van der Hoek, L. Genome structure and transcriptional regulation of human coronavirus NL63. *Virology* **1**, 7 (2004).
8. Hiscox, J.A., Cavanagh, D. & Britton, P. Quantification of individual subgenomic mRNA species during replication of the coronavirus transmissible gastroenteritis virus. *Virus Res* **36**, 119-130 (1995).

9. Hiscox, J.A., Mawditt, K.L., Cavanagh, D. & Britton, P. Investigation of the control of coronavirus subgenomic mRNA transcription by using T7-generated negative-sense RNA transcripts. *J Virol* **69**, 6219-6227 (1995).
10. van Marle, G., Luytjes, W., van der Most, R.G., van der Straaten, T. & Spaan, W.J. Regulation of coronavirus mRNA transcription. *J Virol* **69**, 7851-7856 (1995).
11. La Monica, N., Yokomori, K. & Lai, M.M. Coronavirus mRNA synthesis: identification of novel transcription initiation signals which are differentially regulated by different leader sequences. *Virology* **188**, 402-407 (1992).
12. Alonso, S., Izeta, A., Sola, I. & Enjuanes, L. Transcription regulatory sequences and mRNA expression levels in the coronavirus transmissible gastroenteritis virus. *J Virol* **76**, 1293-1308 (2002).
13. Sawicki, S.G., Sawicki, D.L. & Siddell, S.G. A contemporary view of coronavirus transcription. *J Virol* **81**, 20-29 (2007).
14. Jeong, Y.S. & Makino, S. Evidence for coronavirus discontinuous transcription. *J Virol* **68**, 2615-2623 (1994).
15. Cevik, M., Kuppalli, K., Kindrachuk, J. & Peiris, M. Virology, transmission, and pathogenesis of SARS-CoV-2. *BMJ* **371**, m3862 (2020).
16. Tyson, J.R. et al. Improvements to the ARTIC multiplex PCR method for SARS-CoV-2 genome sequencing using nanopore. *bioRxiv* (2020).
17. Parker, M.D. et al. periscope: sub-genomic RNA identification in SARS-CoV-2 Genomic Sequencing Data. *bioRxiv*, 2020.2007.2001.181867 (2020).

18. Salguero, F.J. et al. Comparison of rhesus and cynomolgus macaques as an infection model for COVID-19. *Nat Commun* **12**, 1260 (2021).
19. Ryan, K.A. et al. Dose-dependent response to infection with SARS-CoV-2 in the ferret model and evidence of protective immunity. *Nat Commun* **12**, 81 (2021).
20. Alexandersen, S., Chamings, A. & Bhatta, T.R. SARS-CoV-2 genomic and subgenomic RNAs in diagnostic samples are not an indicator of active replication. *Nature communications* **11**, 1-13 (2020).
21. Keep, S. et al. Multiple novel non-canonically transcribed sub-genomic mRNAs produced by avian coronavirus infectious bronchitis virus. *J Gen Virol* **101**, 1103-1118 (2020).
22. Nomburg, J., Meyerson, M. & DeCaprio, J.A. Pervasive generation of non-canonical subgenomic RNAs by SARS-CoV-2. *Genome Med* **12**, 108 (2020).
23. Corbett, K.S. et al. Evaluation of the mRNA-1273 Vaccine against SARS-CoV-2 in Nonhuman Primates. *N Engl J Med* **383**, 1544-1555 (2020).
24. Yu, J. et al. DNA vaccine protection against SARS-CoV-2 in rhesus macaques. *Science* **369**, 806-811 (2020).
25. Alexandersen, S., Chamings, A. & Bhatta, T.R. SARS-CoV-2 genomic and subgenomic RNAs in diagnostic samples are not an indicator of active replication. *Nat Commun* **11**, 6059 (2020).
26. Martin, M. Cutadapt removes adapter sequences from high-throughput sequencing reads. *EMBnet.journal* **17**, <https://doi.org/10.14806/ej.14817.14801.14200> (2011).
27. Joshi, N.A. & Fass, J.N. Sickle: A sliding-window, adaptive, quality-based trimming tool for FastQ files

(Version 1.33). <https://github.com/najoshi/sickle> (2011).

28. Kim, D., Langmead, B. & Salzberg, S.L. HISAT: a fast spliced aligner with low memory requirements. *Nat Methods* **12**, 357-360 (2015).
29. Li, H. Minimap2: pairwise alignment for nucleotide sequences. *Bioinformatics* **34**, 3094-3100 (2018).
30. Li, H. et al. The Sequence Alignment/Map format and SAMtools. *Bioinformatics* **25**, 2078-2079 (2009).
29. Li, H. Minimap2: pairwise alignment for nucleotide sequences. *Bioinformatics* **34**, 3094-3100, doi:10.1093/bioinformatics/bty191 (2018).
30. Li, H. *et al.* The Sequence Alignment/Map format and SAMtools. *Bioinformatics* **25**, 2078-2079, doi:10.1093/bioinformatics/btp352 (2009).

### **Ethics approval and consent to participate**

All experimental work on NHPs was conducted under the authority of a UK Home Office approved project license (PDC57C033) that had been subject to local ethical review at PHE Porton Down by the Animal Welfare and Ethical Review Body (AWERB) and approved as required by the Home Office Animals (Scientific Procedures) Act 1986 and the full ethics and NHP model are described.

### **Consent for publication**

Not applicable

### **Availability of data and materials**

LeTRS is available at <https://github.com/xiaofengdong83/LeTRS>.

Illumina and nanopore test data sets are available under NCBI PRJNA699398.

### **Competing interests**

The authors declare that they have no competing interests

### **Funding**

This work was funded by U.S. Food and Drug Administration Medical Countermeasures Initiative contract (75F40120C00085) awarded to JAH. The article reflects the views of the authors and does not represent the views or policies of the FDA. This work was also supported by the MRC (MR/W005611/1) G2P-UK: A national virology consortium to address phenotypic consequences of SARS-CoV-2 genomic variation (co-I JAH). JAH is also funded by the Centre of Excellence in Infectious Diseases Research (CEIDR) and the Alder Hey Charity. The non-human primate work was funded by the Coalition of Epidemic Preparedness Innovations (CEPI) and the Medical Research Council Project CV220-060, Development of an NHP model of infection and ADE with

COVID-19 (SARS-CoV-2) both awarded to MWC. The ISARIC4C sample collection and sequencing in this study was supported by a grants from the Medical Research Council (grant MC\_PC\_19059), the National Institute for Health Research (NIHR; award CO-CIN-01), the Medical Research Council (MRC; grant MC\_PC\_19059), and by the NIHR Health Protection Research Unit (HPRU) in Emerging and Zoonotic Infections at University of Liverpool in partnership with Public Health England (PHE), in collaboration with Liverpool School of Tropical Medicine and the University of Oxford (award 200907), NIHR HPRU in Respiratory Infections at Imperial College London with PHE (award 200927), Wellcome Trust and Department for International Development (DID; 215091/Z/18/Z), the Bill and Melinda Gates Foundation (OPP1209135), Liverpool Experimental Cancer Medicine Centre (grant reference C18616/A25153), NIHR Biomedical Research Centre at Imperial College London (IS-BRC-1215-20013), PJMO is supported by a NIHR senior investigator award (201385). The views expressed are those of the authors and not necessarily those of the Department of Health and Social Care, DID, NIHR, MRC, Wellcome Trust, or PHE. The funders had no role in the study design; in the collection, analysis, and interpretation of data; in the writing of the report; or in the decision to submit the article for publication.

### **Authors' contributions**

X.D. developed the LeTRS software and performed the informatics analysis. X.D., A.D. and J.A.H. analysed the data. J.S., J.T. and M.W.C. co-ordinated the NHP work and sample processing. R.P.-R., J.P.S., H.G., T.P. and N.R. were involved in sequencing and informatics analysis of the NHP samples with D.A.M. A.D. oversaw sequencing of the human clinical samples with E.V. and C.N for the COG-UK data. R.P.-R. and J.A.H. oversaw sequencing of samples under the auspices of

ISARIC-4C managed by J.K.B, L.T., M.G.S. and P.J.M.O. J.A.H. and M.W.C. initiated and managed the study and wrote the manuscript with X.D., R.P.-R., A.D. with other authors involved in editing the final version.

### **Acknowledgments**

We would like to thank all members of the Hiscox Laboratory and the Centre for Genome Research for supporting SARS-CoV-2/COVID-19 sequencing research. We would like to acknowledge members of the COG-UK and ISARIC4C consortia for acquisition of the human samples used in this study. **The members of the COG-UK consortia are:** Thomas R. Connor, Nicholas J. Loman, Samuel C. Robson, Tanya Golubchik, M. Estee Torok, William L. Hamilton, David Bonsall, Ali R. Awan, Sally Corden, Ian Goodfellow, Darren L. Smith, Martin D. Curran, Surendra Parmar, James G. Shepherd, Matthew D. Parker, Catherine Moore, Derek J. Fairley, Matthew W. Loose, Joanne Watkins, Matthew Bull, Sam Nicholls, David M. Aanensen, Sharon Glaysher, Matthew Bashton, Nicole Pacchiarini, Anthony P. Underwood, Thushan I. de Silva, Dennis Wang, Monique Andersson, Anoop J. Chauhan, Mariateresa de Cesare, Catherine Ludden, Tabitha W. Mahungu, Rebecca Dewar, Martin P. McHugh, Natasha G. Jesudason, Kathy K. Li, Rajiv N. Shah, Yusri Taha, Kate E. Templeton, Simon Cottrell, Justin O’Grady, Andrew Rambaut, Colin P. Smith, Matthew T.G. Holden, Emma C. Thomson, Samuel Moses, Meera Chand, Chrystala Constantinidou, Alistair C. Darby, Julian A. Hiscox, Steve Paterson, Meera Unnikrishnan, Andrew J. Page, Erik M. Volz, Charlotte J. Houldcroft, Aminu S. Jahun, James P. McKenna, Luke W. Meredith, Andrew Nelson, Sarojini Pandey, Gregory R. Young, Anna Price, Sara Rey, Sunando Roy, Ben Temperton, Matthew Wyles, Stefan Rooke, Sharif Shaaban, Helen Adams, Yann Bourgeois, Katie F. Loveson, Áine O’Toole, Richard Stark, Ewan M. Harrison, David Heyburn, Sharon J.



Peacock, David Buck, Michaela John, Dorota Jamrozy, Joshua Quick, Rahul Batra, Katherine L. Bellis, Beth Blane, Sophia T. Girgis, Angie Green, Anita Justice, Mark Kristiansen, Rachel J. Williams, Radoslaw Poplawski, Garry P. Scarlett, John A. Todd, Christophe Fraser, Judith Breuer, Sergi Castellano, Stephen L. Michell, Dimitris Gramatopoulos, Jonathan Edgeworth, Gemma L. Kay, Ana da Silva Filipe, Aaron R. Jeffries, Sascha Ott, Oliver Pybus, David L. Robertson, David A. Simpson, Chris Williams, Cressida Auckland, John Boyes, Samir Dervisevic, Sian Ellard, Sonia Goncalves, Emma J. Meader, Peter Muir, Husam Osman, Reenesh Prakash, Venkat Sivaprakasam, Ian B. Vipond, Jane A.H. Masoli, Nabil-Fareed Alikhan, Matthew Carlile, Noel Craine, Sam T. Haldenby, Nadine Holmes, Ronan A. Lyons, Christopher Moore, Malorie Perry, Ben Warne, Thomas Williams, Lisa Berry, Andrew Bosworth, Julianne Rose Brown, Sharon Campbell, Anna Casey, Gemma Clark, Jennifer Collins, Alison Cox, Thomas Davis, Gary Eltringham, Cariad Evans, Clive Graham, Fenella Halstead, Kathryn Ann Harris, Christopher Holmes, Stephanie Hutchings, Miren Iturriza-Gomara, Kate Johnson, Katie Jones, Alexander J. Keeley, Bridget A. Knight, Cherian Koshy, Steven Liggett, Hannah Lowe, Anita O. Lucaci, Jessica Lynch, Patrick C McClure, Nathan Moore, Matilde Mori, David G. Partridge, Pinglawathee Madona, Hannah M. Pymont, Paul Anthony Randell, Mohammad Raza, Felicity Ryan, Robert Shaw, Tim J. Sloan, Emma Swindells, Alexander Adams, Hibo Asad, Alec Birchley, Tony Thomas Brooks, Giselda Bucca, Ethan Butcher, Sarah L. Caddy, Laura G. Caller, Yasmin Chaudhry, Jason Coombes, Michelle Cronin, Patricia L. Dyal, Johnathan M. Evans, Laia Fina, Bree Gatica-Wilcox, Iliana Georgana, Lauren Gilbert, Lee Graham, Danielle C. Groves, Grant Hall, Ember Hilvers, Myra Hosmillo, Hannah Jones, Sophie Jones, Fahad A. Khokhar, Sara Kumziene-Summerhayes, George MacIntyre-Cockett, Rocio T. Martinez Nunez, Caoimhe McKerr, Claire McMurray, Richard Myers, Yasmin Nicole Panchbhaya, Malte L. Pinckert, Amy

Plimmer, Joanne Stockton, Sarah Taylor, Alicia Thornton, Amy Trebes, Alexander J. Trotter, Helena Jane Tutill, Charlotte A. Williams, Anna Yakovleva, Wen C. Yew, Mohammad T. Alam, Laura Baxter, Olivia Boyd, Fabricia F. Nascimento, Timothy M. Freeman, Lily Geidelberg, Joseph Hughes, David Jorgensen, Benjamin B. Lindsey, Richard J. Orton, Manon Ragonnet-Cronin, Joel Southgate, Sreenu Vattipally, Igor Starinskij, Joshua B. Singer, Khalil Abudahab, Leonardo de Oliveira Martins, Thanh Le-Viet, Mirko Menegazzo, Ben E.W. Taylor, Corin A. Yeats, Sophie Palmer, Carol M. Churcher, Alisha Davies, Elen De Lacy, Fatima Downing, Sue Edward, Nikki Smith, Frances Bolt, Alex Alderton, Matt Berriman, Ian G. Charles, Nicholas Cortes, Tanya Curran, John Danesh, Sahar Eldirdiri, Ngozi Elumogo, Andrew Hattersley, Alison Holmes, Robin Howe, Rachel Jones, Anita Kenyon, Robert A. Kingsley, Dominic Kwiatkowski, Cordelia Langford, Jenifer Mason, Alison E. Mather, Lizzie Meadows, Sian Morgan, James Price, Trevor I. Robinson, Giri Shankar, John Wain, Mark A. Webber, Declan T. Bradley, Michael R. Chapman, Derrick Croke, David Eyre, Martyn Guest, Huw Gulliver, Sarah Hoosdally, Christine Kitchen, Ian Merrick, Siddharth Mookerjee, Robert Munn, Timothy Peto, Will Potter, Dheeraj K Sethi, Wendy Smith, Luke B. Snell, Rachael Stanley, Claire Stuart, Elizabeth Wastenge, Erwan Acheson, Safiah Afifi, Elias Allara, Roberto Amato, Adrienn Angyal, Elihu Aranday-Cortes, Cristina Ariani, Jordan Ashworth, Stephen Attwood, Alp Aydin, David J. Baker, Carlos E. Balcazar, Angela Beckett, Robert Beer, Gilberto Betancor, Emma Betteridge, David Bibby, Daniel Bradshaw, Catherine Bresner, Hannah E. Bridgewater, Alice Broos, Rebecca Brown, Paul E. Brown, Kirstyn Bruncker, Stephen N. Carmichael, Jeffrey K.J. Cheng, Rachel Colquhoun, Gavin Dabrera, Johnny Debebe, Eleanor Drury, Louis du Plessis, Richard Eccles, Nicholas Ellaby, Audrey Farbos, Ben Farr, Jacqueline Findlay, Chloe L. Fisher, Leysa Marie Forrest, Sarah Francois, Lucy R. Frost, William Fuller, Eileen Gallagher, Michael D. Gallagher,

Matthew Gemmell, Rachel A.J. Gilroy, Scott Goodwin, Luke R. Green, Richard Gregory, Natalie Groves, James W. Harrison, Hassan Hartman, Andrew R. Hesketh, Verity Hill, Jonathan Hubb, Margaret Hughes, David K. Jackson, Ben Jackson, Keith James, Natasha Johnson, Ian Johnston, Jon-Paul Keatley, Moritz Kraemer, Angie Lackenby, Mara Lawniczak, David Lee, Rich Livett, Stephanie Lo, Daniel Mair, Joshua Maksimovic, Nikos Manesis, Robin Manley, Carmen Manso, Angela Marchbank, Inigo Martincorena, Tamyo Mbisa, Kathryn McCluggage, J.T. McCrone, Shahjahan Miah, Michelle L. Michelsen, Mari Morgan, Gaia Nebbia, Charlotte Nelson, Jenna Nichols, Paola Niola, Kyriaki Nomikou, Steve Palmer, Naomi Park, Yasmin A. Parr, Paul J. Parsons, Vineet Patel, Minal Patel, Clare Pearson, Steven Platt, Christoph Puethe, Mike Quail, Jayna Raghwani, Lucille Rainbow, Shavanthi Rajatileka, Mary Ramsay, Paola C. Resende Silva, Steven Rudder, Chris Ruis, Christine M. Sambles, Fei Sang, Ulf Schaefer, Emily Scher, Carol Scott, Lesley Shirley, Adrian W. Signell, John Sillitoe, Christen Smith, Katherine L. Smollett, Karla Spellman, Thomas D. Stanton, David J. Studholme, Grace Taylor-Joyce, Ana P. Tedim, Thomas Thompson, Nicholas M. Thomson, Scott Thurston, Lily Tong, Gerry Tonkin-Hill, Rachel M. Tucker, Edith E. Vamos, Tetyana Vasylyeva, Joanna Warwick-Dugdale, Danni Weldon, Mark Whitehead, David Williams, Kathleen A. Williamson, Harry D. Wilson, Trudy Workman, Muhammad Yasir, Xiaoyu Yu, Alex Zarebski, Evelien M. Adriaenssens, Shazaad S.Y. Ahmad, Adela Alcolea-Medina, John Allan, Patawee Asamaphan, Laura Atkinson, Paul Baker, Jonathan Ball, Edward Barton, Mathew A. Beale, Charlotte Beaver, Andrew Beggs, Andrew Bell, Duncan J Berger, Louise Berry, Claire M. Bewshea, Kelly Bicknell, Paul Bird, Chloe Bishop, Tim Boswell, Cassie Breen, Sarah K. Buddenborg, Shirelle Burton-Fanning, Vicki Chalker, Joseph G. Chappell, Themoula Charalampous, Claire Cormie, Nick Cortes, Lindsay J. Coupland, Angela Cowell, Rose K. Davidson, Joana Dias, Maria Diaz,

Thomas Dibling, Matthew J. Dorman, Nichola Duckworth, Scott Elliott, Sarah Essex, Karlie Fallon, Theresa Feltwell, Vicki M Fleming, Sally Forrest, Luke Foulser, Maria V. Garcia-Casado, Artemis Gavriil, Ryan P. George, Laura Gifford, Harmeet K. Gill, Jane Greenaway, Luke Griffith, Ana Victoria Gutierrez, Antony D. Hale, Tanzina Haque, Katherine L. Harper, Ian Harrison, Judith Heaney, Thomas Helmer, Ellen E. Higginson, Richard Hopes, Hannah C. Howson-Wells, Adam D. Hunter, Robert Impey, Dianne Irish-Tavares, David A. Jackson, Kathryn A. Jackson, Amelia Joseph, Leanne Kane, Sally Kay, Leanne M. Kermack, Manjinder Khakh, Stephen P. Kidd, Anastasia Kolyva, Jack C.D. Lee, Laura Letchford, Nick Levene, Lisa J. Levett, Michelle M. Lister, Allyson Lloyd, Joshua Loh, Louissa R. Macfarlane-Smith, Nicholas W. Machin, Mailis Maes, Samantha McGuigan, Liz McMinn, Lamia Mestek-Boukhibar, Zoltan Molnar, Lynn Monaghan, Catrin Moore, Plamena Naydenova, Alexandra S. Neaverson, Rachel Nelson, Marc O. Niebel, Elaine O'Toole, Debra Padgett, Gaurang Patel, Brendan A.I. Payne, Liam Prestwood, Veena Raviprakash, Nicola Reynolds, Alex Richter, Esther Robinson, Hazel A. Rogers, Aileen Rowan, Garren Scott, Divya Shah, Nicola Sheriff, Graciela Sluga, Emily Souster, Michael Spencer-Chapman, Sushmita Sridhar, Tracey Swingler, Julian Tang, Graham P. Taylor, Theocharis Tsoleridis, Lance Turtle, Sarah Walsh, Michelle Wantoch, Joanne Watts, Sheila Waugh, Sam Weeks, Rebecca Williams, Iona Willingham, Emma L. Wise, Victoria Wright, Sarah Wyllie, Jamie Young, Amy Gaskin, Will Rowe, Igor Siveroni, and Robert Johnson.

**The members of the ISARIC4C consortia are:** Consortium Lead Investigator: J. Kenneth Baillie; Chief Investigator: Malcolm G. Semple; Co-Lead Investigator: Peter J.M. Openshaw; ISARIC Clinical Coordinator: Gail Carson; Co-Investigators: Beatrice Alex, Benjamin Bach, Wendy S. Barclay, Debby Bogaert, Meera Chand, Graham S. Cooke, Annemarie B. Docherty, Jake Dunning, Ana da Silva Filipe, Tom Fletcher, Christopher A. Green, Ewen M. Harrison, Julian A. Hiscox,

Antonia Ying Wai Ho, Peter W. Horby, Samreen Ijaz, Saye Khoo, Paul Klenerman, Andrew Law, Wei Shen Lim, Alexander J. Mentzer, Laura Merson, Alison M. Meynert, Mahdad Noursadeghi, Shona C. Moore, Massimo Palmarini, William A. Paxton, Georgios Pollakis, Nicholas Price, Andrew Rambaut, David L. Robertson, Clark D. Russell, Vanessa Sancho-Shimizu, Janet T. Scott, Thushan de Silva, Louise Sigfrid, Tom Solomon, Shiranee Srisakandan, David Stuart, Charlotte Summers, Richard S. Tedder, Emma C. Thomson, A.A. Roger Thompson, Ryan S. Thwaites, Lance C.W. Turtle, and Maria Zambon; Project Managers: Hayley Hardwick, Chloe Donohue, Ruth Lyons, Fiona Griffiths, and Wilna Oosthuizen; Data Analysts: Lisa Norman, Riinu Pius, Tom M. Drake, Cameron J. Fairfield, Stephen Knight, Kenneth A. Mclean, Derek Murphy, and Catherine A. Shaw; Data and Information System Managers: Jo Dalton, James Lee, Daniel Plotkin, Michelle Girvan, Egle Saviciute, Stephanie Roberts, Janet Harrison, Laura Marsh, Marie Connor, Sophie Halpin, Clare Jackson, and Carrol Gamble; Data Integration and Presentation: Gary Leeming, Andrew Law, Murray Wham, Sara Clohisey, Ross Hendry, and James Scott-Brown; Material Management: William Greenhalf, Victoria Shaw, and Sarah McDonald; Patient Engagement: Seán Keating; Outbreak Laboratory Staff and Volunteers: Katie A. Ahmed, Jane A. Armstrong, Milton Ashworth, Innocent G. Asimwe, Siddharth Bakshi, Samantha L. Barlow, Laura Booth, Benjamin Brennan, Katie Bullock, Benjamin W.A. Catterall, Jordan J. Clark, Emily A. Clarke, Sarah Cole, Louise Cooper, Helen Cox, Christopher Davis, Oslem Dincarslan, Chris Dunn, Philip Dyer, Angela Elliott, Anthony Evans, Lorna Finch, Lewis W.S. Fisher, Terry Foster, Isabel Garcia-Dorival, William Greenhalf, Philip Gunning, Catherine Hartley, Antonia Ho, Rebecca L. Jensen, Christopher B. Jones, Trevor R. Jones, Shadia Khandaker, Katharine King, Robyn T. Kiy, Chrysa Koukorava, Annette Lake, Suzannah Lant, Diane Latawiec, L. Lavelle-Langham, Daniella Lefteri, Lauren Lett, Lucia A. Livoti,

Maria Mancini, Sarah McDonald, Laurence McEvoy, John McLauchlan, Soeren Metelmann, Nahida S. Miah, Joanna Middleton, Joyce Mitchell, Shona C. Moore, Ellen G. Murphy, Rebekah Penrice-Randal, Jack Pilgrim, Tessa Prince, Will Reynolds, P. Matthew Ridley, Debby Sales, Victoria E. Shaw, Rebecca K. Shears, Benjamin Small, Krishanthi S. Subramaniam, Agnieska Szemiel, Aislynn Taggart, Jolanta Tanianis-Hughes, Jordan Thomas, Erwan Trochu, Libby van Tonder, Eve Wilcock, and J. Eunice Zhang; Local Principal Investigators: Kayode Adeniji, Daniel Agranoff, Ken Agwuh, Dhiraj Ail, Ana Alegria, Brian Angus, Abdul Ashish, Dougal Atkinson, Shahedal Bari, Gavin Barlow, Stella Barnass, Nicholas Barrett, Christopher Bassford, David Baxter, Michael Beadsworth, Jolanta Bernatoniene, John Berridge, Nicola Best, Pieter Bothma, David Brealey, Robin Brittain-Long, Naomi Bulteel, Tom Burden, Andrew Burtenshaw, Vikki Caruth, David Chadwick, Duncan Chambler, Nigel Chee, Jenny Child, Srikanth Chukkambotla, Tom Clark, Paul Collini, Catherine Cosgrove, Jason Cupitt, Maria-Teresa Cutino-Moguel, Paul Dark, Chris Dawson, Samir Dervisevic, Phil Donnison, Sam Douthwaite, Ingrid DuRand, Ahilanadan Dushianthan, Tristan Dyer, Cariad Evans, Chi Eziefula, Chrisopher Fegan, Adam Finn, Duncan Fullerton, Sanjeev Garg, Sanjeev Garg, Atul Garg, Effrossyni Gkrania-Klotsas, Jo Godden, Arthur Goldsmith, Clive Graham, Elaine Hardy, Stuart Hartshorn, Daniel Harvey, Peter Havalda, Daniel B. Hawcutt, Maria Hobrok, Luke Hodgson, Anil Hormis, Michael Jacobs, Susan Jain, Paul Jennings, Agilan Kaliappan, Vidya Kasipandian, Stephen Kegg, Michael Kelsey, Jason Kendall, Caroline Kerrison, Ian Kerslake, Oliver Koch, Gouri Koduri, George Koshy, Shondipon Laha, Steven Laird, Susan Larkin, Tamas Leiner, Patrick Lillie, James Limb, Vanessa Linnett, Jeff Little, Michael MacMahon, Emily MacNaughton, Ravish Mankregod, Huw Masson, Elijah Matovu, Katherine McCullough, Ruth McEwen, Manjula Meda, Gary Mills, Jane Minton, Mariyam Mirfenderesky,

Kavya Mohandas, Quen Mok, James Moon, Elinoor Moore, Patrick Morgan, Craig Morris, Katherine Mortimore, Samuel Moses, Mbiye Mpenge, Rohinton Mulla, Michael Murphy, Megan Nagel, Thapas Nagarajan, Mark Nelson, Igor Otahal, Mark Pais, Selva Panchatsharam, Hassan Paraiso, Brij Patel, Natalie Pattison, Justin Pepperell, Mark Peters, Mandeep Phull, Stefania Pintus, Jagtur Singh Pooni, Frank Post, David Price, Rachel Prout, Nikolas Rae, Henrik Reschreiter, Tim Reynolds, Neil Richardson, Mark Roberts, Devender Roberts, Alistair Rose, Guy Rousseau, Brendan Ryan, Taranprit Saluja, Aarti Shah, Prad Shanmuga, Anil Sharma, Anna Shawcross, Jeremy Sizer, Manu Shankar-Hari, Richard Smith, Catherine Snelson, Nick Spittle, Nikki Staines, Tom Stambach, Richard Stewart, Pradeep Subudhi, Tamas Szakmany, Kate Tatham, Jo Thomas, Chris Thompson, Robert Thompson, Ascanio Tridente, Darell Tupper-Carey, Mary Twagira, Andrew Ustianowski, Nick Vallotton, Lisa Vincent-Smith, Shico Visuvanathan, Alan Vuylsteke, Sam Waddy, Rachel Wake, Andrew Walden, Ingeborg Welters, Tony Whitehouse, Paul Whittaker, Ashley Whittington, Meme Wijesinghe, Martin Williams, Lawrence Wilson, Sarah Wilson, Stephen Winchester, Martin Wiselka, Adam Wolverson, Daniel G. Wooton, Andrew Workman, Bryan Yates, and Peter Young.

Table 1. The LeTRS output table for known sgmRNA in the tested Nanopore ARTIC v3 primers amplicon sequencing data. “ref\_leader\_end” and “peak\_leader\_end” point to the reference position of the end of leader and the position of the end of leader identified in the most common reads (peak count) on the reference genome, and “ref\_TRS\_start” and “peak\_TRS\_start” refer to the reference position of the start of TRS and the position of the start of TRS identified in the most common reads (peak count) on the reference genome.

| subgenome | ref_leader_end | peak_leader_end | ref_TRS_start | peak_TRS_start | peak_count                   | peak_normalized_count                      | cluster_count                | cluster_normalized_count                   |
|-----------|----------------|-----------------|---------------|----------------|------------------------------|--------------------------------------------|------------------------------|--------------------------------------------|
| S         | 65             | 65              | 21552         | 21552          | 980(963,343,337,0,0)         | 467.02(458.92,163.46,160.60,0.00,0.00)     | 984(967,346,340,0,0)         | 468.93(460.83,164.89,162.03,0.00,0.00)     |
| ORF3a     | 69             | 69              | 25385         | 25385          | 76(70,51,46,0,0)             | 36.22(33.36,24.30,21.92,0.00,0.00)         | 79(73,52,47,0,0)             | 37.65(34.79,24.78,22.40,0.00,0.00)         |
| E         | 69             | 69              | 26237         | 26237          | 268(260,41,39,0,0)           | 127.72(123.90,19.54,18.59,0.00,0.00)       | 269(261,42,40,0,0)           | 128.19(124.38,20.02,19.06,0.00,0.00)       |
| M         | 65             | 65              | 26469         | 26469          | 15933(15731,2084,2058,0,0)   | 7592.89(7496.63,993.13,980.74,0.00,0.00)   | 16358(16153,2151,2122,0,0)   | 7795.43(7697.73,1025.06,1011.24,0.00,0.00) |
| ORF6      | 69             | 69              | 27041         | 27041          | 1359(1339,1334,1315,0,0)     | 647.63(638.10,635.72,626.66,0.00,0.00)     | 1377(1357,1351,1332,0,0)     | 656.21(646.68,643.82,634.77,0.00,0.00)     |
| ORF7a     | 69             | 69              | 27388         | 27388          | 991(960,758,733,0,0)         | 472.26(457.49,361.23,349.31,0.00,0.00)     | 999(968,765,740,0,0)         | 476.07(461.30,364.56,352.65,0.00,0.00)     |
| ORF7b     | 65             | 69              | 27644         | 27755          | 31(31,31,31,0,0)             | 14.77(14.77,14.77,14.77,0.00,0.00)         | 40(40,40,40,0,0)             | 19.06(19.06,19.06,19.06,0.00,0.00)         |
| ORF8      | 65             | 65              | 27884         | 27884          | 19(14,5,3,0,0)               | 9.05(6.67,2.38,1.43,0.00,0.00)             | 20(15,6,4,0,0)               | 9.53(7.15,2.86,1.91,0.00,0.00)             |
| N         | 65             | 65              | 28256         | 28256          | 15079(14916,14608,14451,0,0) | 7185.92(7108.24,6961.46,6886.64,0.00,0.00) | 15447(15277,14962,14799,0,0) | 7361.29(7280.27,7130.16,7052.48,0.00,0.00) |
| ORF10     | 65             | 0               | 29530         | 0              | 0                            | 0                                          | 0                            | 0                                          |

The numbers in the bracket are (reads with left primers, reads with right primers, reads with both primers, reads with > 1 poly A, reads with > 5 poly A).

Normalized count=(Read count-Total number of read mapped on reference genome)\*1000000.

Total number of read mapped on reference genome is 2098410, excluding the mapped reads not primary alignment and supplementary alignment.



Table 2. The LeTRS output table for novel sgmRNA in the tested Nanopore ARTIC v3 primers amplicon sequencing data. “leader\_end” and “TRS\_start” refer to the position of the end of leader and the position of the start of TRS identified in the reads >10.

| subgenome | leader_end | TRS_start | nb_count         | normalized_count               |
|-----------|------------|-----------|------------------|--------------------------------|
| 1         | 74         | 21055     | 15(13,15,13,0,0) | 7.15(6.20,7.15,6.20,0.00,0.00) |
| 2         | 52         | 28249     | 13(13,12,12,0,0) | 6.20(6.20,5.72,5.72,0.00,0.00) |

The numbers in the bracket are (reads with left primers, reads with right primers, reads with both primers, same junction on paired reads with at least a primer).

Normalized count=(Read count/Total number of read mapped on reference genome)\*1000000.

Total number of read mapped on reference genome is 2098410, excluding the mapped reads unpaired, not primary alignment and supplementary alignment.

Table 3. The LeTRS output table for known sgmRNA in the tested Nanopore direct RNA sequencing data. “ref\_leader\_end” and “peak\_leader\_end” point to the reference position of the end of leader and the position of the end of leader identified in the most common reads (peak count) on the reference genome, and “ref\_TRS\_start” and “peak\_TRS\_start” refer to the reference position of the start of TRS and the position of the start of TRS identified in the most common reads (peak count) on the reference genome.

| subgenome | ref_leader_end | peak_leader_end | ref_TRS_start | peak_TRS_start | peak_count         | peak_normalized_count         | cluster_count      | cluster_normalized_count      |
|-----------|----------------|-----------------|---------------|----------------|--------------------|-------------------------------|--------------------|-------------------------------|
| S         | 65             | 65              | 21552         | 21552          | 6788(6174,2523)    | 11792.99(10726.27,4383.28)    | 6804(6188,2530)    | 11820.79(10750.60,4395.44)    |
| ORF3a     | 69             | 69              | 25385         | 25385          | 22067(20772,8642)  | 38337.65(36087.81,15014.00)   | 22877(21523,8958)  | 39744.89(37392.55,15563.00)   |
| E         | 69             | 69              | 26237         | 26237          | 1628(1549,645)     | 2828.37(2691.12,1120.58)      | 1650(1568,653)     | 2866.59(2724.13,1134.48)      |
| M         | 65             | 65              | 26469         | 26469          | 44139(41659,17295) | 76683.99(72375.42,30047.12)   | 44694(42179,17509) | 77648.21(73278.83,30418.90)   |
| ORF6      | 69             | 69              | 27041         | 27041          | 6469(6155,2412)    | 11238.79(10693.26,4190.44)    | 6634(6312,2474)    | 11525.44(10966.02,4298.15)    |
| ORF7a     | 69             | 69              | 27388         | 27388          | 36409(34564,13697) | 63254.44(60049.06,23796.20)   | 36830(34956,13872) | 63985.85(60730.10,24100.24)   |
| ORF7b     | 65             | 69              | 27644         | 27755          | 271(258,100)       | 470.82(448.23,173.73)         | 510(485,194)       | 886.04(842.60,337.04)         |
| ORF8      | 65             | 65              | 27884         | 27884          | 7321(6976,2755)    | 12718.99(12119.61,4786.34)    | 7400(7047,2781)    | 12856.24(12242.96,4831.51)    |
| N         | 65             | 65              | 28256         | 28256          | 84729(80939,32275) | 147202.20(140617.72,56072.31) | 85768(81918,32650) | 149007.29(142318.57,56723.81) |
| ORF10     | 65             | 0               | 29530         | 0              | 0                  | 0                             | 0                  | 0                             |

The numbers in the bracket are (reads with > 1 poly A, reads with > 5 poly A).

Normalized count=(Read count/Total number of read mapped on reference genome)\*1000000.

Total number of read mapped on reference genome is 575596, excluding mapped reads on reverse strand, not primary alignment and supplementary alignment.



Table 4. The LeTRS output table for novel sgmRNA in the tested Nanopore direct RNA sequencing data. “leader\_end” and “TRS\_start” refer to the position of the end of leader and the position of the start of TRS identified in the reads >10.

| subgenome | leader_end | TRS_start | nb_count    | normalized_count     |
|-----------|------------|-----------|-------------|----------------------|
| 1         | 52         | 26469     | 40(36,13)   | 69.49(62.54,22.59)   |
| 2         | 52         | 28249     | 99(90,36)   | 172.00(156.36,62.54) |
| 3         | 52         | 28256     | 138(127,50) | 239.75(220.64,86.87) |
| 4         | 60         | 21045     | 16(16,6)    | 27.80(27.80,10.42)   |
| 5         | 65         | 22273     | 17(16,5)    | 29.53(27.80,8.69)    |
| 6         | 65         | 22488     | 12(11,5)    | 20.85(19.11,8.69)    |
| 7         | 65         | 24777     | 24(23,11)   | 41.70(39.96,19.11)   |
| 8         | 65         | 27479     | 51(48,18)   | 88.60(83.39,31.27)   |
| 9         | 69         | 21053     | 17(14,6)    | 29.53(24.32,10.42)   |
| 10        | 69         | 26292     | 14(14,4)    | 24.32(24.32,6.95)    |
| 11        | 69         | 28284     | 14(14,7)    | 24.32(24.32,12.16)   |
| 12        | 69         | 29112     | 21(21,6)    | 36.48(36.48,10.42)   |
| 13        | 69         | 29152     | 11(11,4)    | 19.11(19.11,6.95)    |

The numbers in the bracket are (reads with > 1 poly A, reads with > 5 poly A).

Normalized count=(Read count/Total number of read mapped on reference genome)\*1000000.

Total number of read mapped on reference genome is 575596, excluding mapped reads on reverse strand, not primary alignment and supplementary alignment.

Table 5. The LeTRS output table for known sgmRNA in the negative control of the tested nanopore direct RNA sequencing data. “ref\_leader\_end” and “peak\_leader\_end” point to the reference position of the end of leader and the position of the end of leader identified in the most common reads (peak count) on the reference genome, and “ref\_TRS\_start” and “peak\_TRS\_start” refer to the reference position of the start of TRS and the position of the start of TRS identified in the most common reads (peak count) on the reference genome.

| subgenome | ref_leader_end | peak_leader_end | ref_TRS_start | peak_TRS_start | peak_count | peak_normalize_count | cluster_count | cluster_normalize_count |
|-----------|----------------|-----------------|---------------|----------------|------------|----------------------|---------------|-------------------------|
| S         | 65             | 0               | 21552         | 0              | 0          | 0                    | 0             | 0                       |
| ORF3a     | 69             | 0               | 25385         | 0              | 0          | 0                    | 0             | 0                       |
| E         | 69             | 0               | 26237         | 0              | 0          | 0                    | 0             | 0                       |
| M         | 65             | 0               | 26469         | 0              | 0          | 0                    | 0             | 0                       |
| ORF6      | 69             | 0               | 27041         | 0              | 0          | 0                    | 0             | 0                       |
| ORF7a     | 69             | 0               | 27388         | 0              | 0          | 0                    | 0             | 0                       |
| ORF7b     | 65             | 0               | 27644         | 0              | 0          | 0                    | 0             | 0                       |
| ORF8      | 65             | 0               | 27884         | 0              | 0          | 0                    | 0             | 0                       |
| N         | 65             | 0               | 28256         | 0              | 0          | 0                    | 0             | 0                       |
| ORF10     | 65             | 0               | 29530         | 0              | 0          | 0                    | 0             | 0                       |

The numbers in the bracket are (reads with > 1 poly A, reads with > 5 poly A).

Normalized count=(Read count/Total number of read mapped on reference genome)\*1000000.

Total number of read mapped on reference genome is 0, excluding mapped reads on reverse strand, not primary alignment and supplementary alignment.

Table 6. The LeTRS output table for novel sgmRNA in the negative control of the tested nanopore direct RNA sequencing data. “leader\_end” and “TRS\_start” refer to the position of the end of leader and the position of the start of TRS identified in the reads >10.

| subgenome | leader_end | TRS_start | nb_count | normalized_count |
|-----------|------------|-----------|----------|------------------|
|-----------|------------|-----------|----------|------------------|

The numbers in the bracket are (reads with > 1 poly A, reads with > 5 poly A).

Normalized count=(Read count/Total number of read mapped on reference genome)\*1000000.

Total number of read mapped on reference genome is 0, excluding mapped reads on reverse strand, not primary alignment and supplementary alignment.

Table 7. The LeTRS output table for known sgmRNA in the tested Illumina ARTIC v3 primers amplicon sequencing data. “ref\_leader\_end” and “peak\_leader\_end” point to the reference position of the end of leader and the position of the end of leader identified in the most common reads (peak count) on the reference genome, and “ref\_TRS\_start” and “peak\_TRS\_start” refer to the reference position of the start of TRS and the position of the start of TRS identified in the most common reads (peak count) on the reference genome.

| subge<br>nome | ref_lead<br>er_end | peak_lead<br>er_end | ref_TRS<br>_start | peak_TR<br>S_start | peak_count                         | peak_normalized_cou<br>nt               | cluster_count                      | cluster_normalized_cou<br>nt                |
|---------------|--------------------|---------------------|-------------------|--------------------|------------------------------------|-----------------------------------------|------------------------------------|---------------------------------------------|
| S             | 65                 | 65                  | 21552             | 21552              | 22925(22785,16484<br>,16368,17326) | 478.71(475.79,344.21<br>,341.79,361.79) | 23312(23169,16709<br>,16591,17418) | 486.79(483.80,348.91,34<br>6.45,363.71)     |
| ORF3<br>a     | 69                 | 69                  | 25385             | 25385              | 5130(4784,0,0,78)                  | 107.12(99.90,0.00,0.0<br>0,1.63)        | 5362(4995,0,0,82)                  | 111.97(104.30,0.00,0.00,<br>1.71)           |
| E             | 69                 | 69                  | 26237             | 26237              | 5135(5014,10,7,50)                 | 107.23(104.70,0.21,0.<br>15,1.04)       | 5139(5017,10,7,50)                 | 107.31(104.76,0.21,0.15,<br>1.04)           |
| M             | 65                 | 64                  | 26469             | 26468              | 12768(12177,12175<br>,11599,8190)  | 266.62(254.27,254.23<br>,242.20,171.02) | 31312(30636,30026<br>,29378,21180) | 653.84(639.73,626.99,61<br>3.46,442.27)     |
| ORF6          | 69                 | 69                  | 27041             | 27041              | 21201(20895,19094<br>,18830,19104) | 442.71(436.32,398.71<br>,393.20,398.92) | 21512(21206,19383<br>,19119,19302) | 449.20(442.81,404.75,39<br>9.23,403.06)     |
| ORF7<br>a     | 69                 | 69                  | 27388             | 27388              | 370(202,244,79,142<br>)            | 7.73(4.22,5.10,1.65,2.<br>97)           | 372(204,246,81,144<br>)            | 7.77(4.26,5.14,1.69,3.01)                   |
| ORF7<br>b     | 65                 | 69                  | 27644             | 27674              | 8(8,8,8,6)                         | 0.17(0.17,0.17,0.17,0.<br>13)           | 12(12,12,12,10)                    | 0.25(0.25,0.25,0.25,0.21)                   |
| ORF8          | 65                 | 65                  | 27884             | 27884              | 678(675,0,0,4)                     | 14.16(14.10,0.00,0.00<br>,0.08)         | 692(689,0,0,4)                     | 14.45(14.39,0.00,0.00,0.<br>08)             |
| N             | 65                 | 64                  | 28256             | 28255              | 35983(35839,35568<br>,35443,9840)  | 751.38(748.37,742.71<br>,740.10,205.47) | 73700(73334,72937<br>,72597,19878) | 1538.97(1531.33,1523.0<br>4,1515.94,415.08) |
| ORF1<br>0     | 65                 | 0                   | 29530             | 0                  | 0                                  | 0                                       | 0                                  | 0                                           |

The numbers in the bracket are (reads with left primers, reads with right primers, reads with both primers, reads with > 1 poly A, reads with > 5 poly A). Normalized count=(Read count/Total number of read mapped on reference genome)\*1000000. Total number of read mapped on the

reference genome is 47889224, excluding the mapped reads not primary alignment and supplementary alignment.

Table 8. The LeTRS output table for novel sgmRNA in the tested Nanopore ARTIC v3 primers amplicon sequencing data. “leader\_end” and “TRS\_start” refer to the position of the end of leader and the position of the start of TRS identified in the reads >10.

| subgenome | leader_end | TRS_start | nb_count             | normalized_count            |
|-----------|------------|-----------|----------------------|-----------------------------|
| 1         | 67         | 25800     | 121(118,117,114,116) | 2.53(2.46,2.44,2.38,2.42)   |
| 2         | 68         | 2689      | 13(13,13,13,12)      | 0.27(0.27,0.27,0.27,0.25)   |
| 3         | 68         | 4580      | 144(143,107,107,118) | 3.01(2.99,2.23,2.23,2.46)   |
| 4         | 68         | 5789      | 56(56,54,54,52)      | 1.17(1.17,1.13,1.13,1.09)   |
| 5         | 68         | 15777     | 536(511,0,0,4)       | 11.19(10.67,0.00,0.00,0.08) |
| 6         | 68         | 18051     | 14(14,0,0,0)         | 0.29(0.29,0.00,0.00,0.00)   |
| 7         | 48         | 26443     | 151(151,149,149,146) | 3.15(3.15,3.11,3.11,3.05)   |
| 8         | 68         | 21926     | 14(14,0,0,0)         | 0.29(0.29,0.00,0.00,0.00)   |
| 9         | 68         | 23020     | 14(14,1,1,4)         | 0.29(0.29,0.02,0.02,0.08)   |
| 10        | 68         | 23365     | 38(38,36,36,36)      | 0.79(0.79,0.75,0.75,0.75)   |
| 11        | 48         | 28184     | 11(11,0,0,0)         | 0.23(0.23,0.00,0.00,0.00)   |
| 12        | 68         | 26290     | 17(17,0,0,0)         | 0.35(0.35,0.00,0.00,0.00)   |
| 13        | 69         | 3816      | 12(12,0,0,0)         | 0.25(0.25,0.00,0.00,0.00)   |
| 14        | 69         | 9713      | 31(31,0,0,0)         | 0.65(0.65,0.00,0.00,0.00)   |
| 15        | 69         | 10640     | 14(14,4,4,6)         | 0.29(0.29,0.08,0.08,0.13)   |
| 16        | 69         | 13619     | 41(41,36,36,36)      | 0.86(0.86,0.75,0.75,0.75)   |
| 17        | 69         | 18554     | 123(123,108,108,114) | 2.57(2.57,2.26,2.26,2.38)   |
| 18        | 49         | 28266     | 21(20,21,20,20)      | 0.44(0.42,0.44,0.42,0.42)   |
| 19        | 69         | 22559     | 104(103,0,0,2)       | 2.17(2.15,0.00,0.00,0.04)   |



|    |    |       |                           |                                |
|----|----|-------|---------------------------|--------------------------------|
| 20 | 69 | 25164 | 155(153,140,138,148)      | 3.24(3.19,2.92,2.88,3.09)      |
| 21 | 70 | 2794  | 42(42,40,40,40)           | 0.88(0.88,0.84,0.84,0.84)      |
| 22 | 70 | 11779 | 172(171,155,154,164)      | 3.59(3.57,3.24,3.22,3.42)      |
| 23 | 70 | 22231 | 139(139,137,137,136)      | 2.90(2.90,2.86,2.86,2.84)      |
| 24 | 70 | 22277 | 1241(1237,1227,1223,1218) | 25.91(25.83,25.62,25.54,25.43) |
| 25 | 70 | 22502 | 19(18,0,0,0)              | 0.40(0.38,0.00,0.00,0.00)      |
| 26 | 70 | 22945 | 31(29,0,0,2)              | 0.65(0.61,0.00,0.00,0.04)      |
| 27 | 70 | 27761 | 11(11,6,6,6)              | 0.23(0.23,0.13,0.13,0.13)      |
| 28 | 71 | 4592  | 47(47,36,36,40)           | 0.98(0.98,0.75,0.75,0.84)      |
| 29 | 71 | 5594  | 41(40,0,0,0)              | 0.86(0.84,0.00,0.00,0.00)      |
| 30 | 71 | 5708  | 61(5,56,0,0)              | 1.27(0.10,1.17,0.00,0.00)      |
| 31 | 71 | 18943 | 84(83,0,0,2)              | 1.75(1.73,0.00,0.00,0.04)      |
| 32 | 71 | 22727 | 35(32,33,30,30)           | 0.73(0.67,0.69,0.63,0.63)      |
| 33 | 71 | 25069 | 11(11,0,0,0)              | 0.23(0.23,0.00,0.00,0.00)      |
| 34 | 71 | 26401 | 14(14,14,14,14)           | 0.29(0.29,0.29,0.29,0.29)      |
| 35 | 71 | 27762 | 55(55,34,34,34)           | 1.15(1.15,0.71,0.71,0.71)      |
| 36 | 71 | 28286 | 24(24,24,24,24)           | 0.50(0.50,0.50,0.50,0.50)      |
| 37 | 72 | 4019  | 36(36,28,28,32)           | 0.75(0.75,0.58,0.58,0.67)      |
| 38 | 72 | 15808 | 13(13,0,0,0)              | 0.27(0.27,0.00,0.00,0.00)      |
| 39 | 73 | 11839 | 73(73,58,58,62)           | 1.52(1.52,1.21,1.21,1.29)      |
| 40 | 73 | 22285 | 173(173,172,172,172)      | 3.61(3.61,3.59,3.59,3.59)      |
| 41 | 73 | 23028 | 57(57,0,0,2)              | 1.19(1.19,0.00,0.00,0.04)      |
| 42 | 73 | 25856 | 24(24,24,24,24)           | 0.50(0.50,0.50,0.50,0.50)      |
| 43 | 74 | 4321  | 40(29,5,0,4)              | 0.84(0.61,0.10,0.00,0.08)      |
| 44 | 74 | 10132 | 30(28,28,28,28)           | 0.63(0.58,0.58,0.58,0.58)      |

|    |    |       |                      |                                |
|----|----|-------|----------------------|--------------------------------|
| 45 | 74 | 12974 | 116(116,96,96,102)   | 2.42(2.42,2.00,2.00,2.13)      |
| 46 | 74 | 13555 | 16(16,16,16,16)      | 0.33(0.33,0.33,0.33,0.33)      |
| 47 | 74 | 21058 | 767(759,759,751,744) | 16.02(15.85,15.85,15.68,15.54) |
| 48 | 74 | 25858 | 29(29,28,28,28)      | 0.61(0.61,0.58,0.58,0.58)      |
| 49 | 75 | 21566 | 14(14,11,11,10)      | 0.29(0.29,0.23,0.23,0.21)      |
| 50 | 75 | 21572 | 24(24,18,18,20)      | 0.50(0.50,0.38,0.38,0.42)      |
| 51 | 75 | 21574 | 14(14,12,12,10)      | 0.29(0.29,0.25,0.25,0.21)      |
| 52 | 75 | 21575 | 29(29,18,18,18)      | 0.61(0.61,0.38,0.38,0.38)      |
| 53 | 75 | 21718 | 24(24,0,0,0)         | 0.50(0.50,0.00,0.00,0.00)      |
| 54 | 75 | 25135 | 14(9,4,0,8)          | 0.29(0.19,0.08,0.00,0.17)      |
| 55 | 75 | 26483 | 11(11,11,11,10)      | 0.23(0.23,0.23,0.23,0.21)      |
| 56 | 75 | 26486 | 95(86,93,84,88)      | 1.98(1.80,1.94,1.75,1.84)      |
| 57 | 75 | 26490 | 19(19,18,18,18)      | 0.40(0.40,0.38,0.38,0.38)      |
| 58 | 75 | 26491 | 115(115,112,112,110) | 2.40(2.40,2.34,2.34,2.30)      |
| 59 | 75 | 26494 | 36(36,32,32,34)      | 0.75(0.75,0.67,0.67,0.71)      |
| 60 | 76 | 28267 | 31(30,27,26,18)      | 0.65(0.63,0.56,0.54,0.38)      |
| 61 | 77 | 25396 | 15(6,0,0,0)          | 0.31(0.13,0.00,0.00,0.00)      |
| 62 | 77 | 26481 | 44(44,43,43,12)      | 0.92(0.92,0.90,0.90,0.25)      |
| 63 | 78 | 21570 | 159(155,118,116,92)  | 3.32(3.24,2.46,2.42,1.92)      |
| 64 | 78 | 21576 | 41(41,20,20,28)      | 0.86(0.86,0.42,0.42,0.58)      |
| 65 | 55 | 26461 | 26(26,17,17,16)      | 0.54(0.54,0.35,0.35,0.33)      |
| 66 | 58 | 23922 | 100(14,86,0,0)       | 2.09(0.29,1.80,0.00,0.00)      |
| 67 | 60 | 4007  | 16(16,16,16,14)      | 0.33(0.33,0.33,0.33,0.29)      |
| 68 | 46 | 26422 | 53(53,52,52,50)      | 1.11(1.11,1.09,1.09,1.04)      |
| 69 | 63 | 698   | 35(16,0,0,2)         | 0.73(0.33,0.00,0.00,0.04)      |

|    |    |       |                      |                           |
|----|----|-------|----------------------|---------------------------|
| 70 | 47 | 17898 | 39(39,39,39,38)      | 0.81(0.81,0.81,0.81,0.79) |
| 71 | 63 | 5785  | 144(142,142,140,140) | 3.01(2.97,2.97,2.92,2.92) |
| 72 | 63 | 6243  | 11(11,0,0,0)         | 0.23(0.23,0.00,0.00,0.00) |
| 73 | 63 | 23142 | 23(19,0,0,0)         | 0.48(0.40,0.00,0.00,0.00) |
| 74 | 63 | 25001 | 19(4,1,0,0)          | 0.40(0.08,0.02,0.00,0.00) |
| 75 | 63 | 25672 | 11(10,0,0,0)         | 0.23(0.21,0.00,0.00,0.00) |
| 76 | 47 | 26421 | 65(65,64,64,62)      | 1.36(1.36,1.34,1.34,1.29) |
| 77 | 64 | 25795 | 19(8,19,8,18)        | 0.40(0.17,0.40,0.17,0.38) |
| 78 | 65 | 7595  | 15(14,14,14,14)      | 0.31(0.29,0.29,0.29,0.29) |
| 79 | 65 | 8113  | 82(45,44,7,80)       | 1.71(0.94,0.92,0.15,1.67) |
| 80 | 65 | 10020 | 32(32,30,30,32)      | 0.67(0.67,0.63,0.63,0.67) |
| 81 | 65 | 11200 | 12(12,8,8,8)         | 0.25(0.25,0.17,0.17,0.17) |
| 82 | 65 | 11664 | 70(68,0,0,2)         | 1.46(1.42,0.00,0.00,0.04) |
| 83 | 66 | 22502 | 22(20,0,0,0)         | 0.46(0.42,0.00,0.00,0.00) |
| 84 | 67 | 3362  | 20(20,20,20,20)      | 0.42(0.42,0.42,0.42,0.42) |
| 85 | 67 | 4018  | 75(75,66,66,72)      | 1.57(1.57,1.38,1.38,1.50) |
| 86 | 67 | 21083 | 32(31,30,29,32)      | 0.67(0.65,0.63,0.61,0.67) |

The numbers in the bracket are (reads with left primers, reads with right primers, reads with both primers, reads with > 1 poly A, reads with > 5 poly A).

Normalized count=(Read count/Total number of read mapped on reference genome)\*1000000.

Total number of read mapped on reference genome is 47889224, excluding the mapped reads not primary alignment and supplementary alignment.

Table 9. The criteria of basic and advanced filtering for four different types of input data for LeTRS.

| Output Filters       |                                                  | Illumina<br>paired-<br>end reads | Nanopore<br>cDNA<br>reads | Nanopore<br>RNA reads | Bam |
|----------------------|--------------------------------------------------|----------------------------------|---------------------------|-----------------------|-----|
|                      | MAPQ > 10                                        | •                                | •                         | •                     | •   |
|                      | Read only one splicing junction                  | •                                | •                         | •                     | •   |
| Basic<br>filtering   | Primary alignment only                           | •                                | •                         | •                     | •   |
|                      | No supplementary alignment                       | •                                | •                         | •                     | •   |
|                      | Read mapped in pair                              | •                                |                           |                       |     |
|                      | No read reverse strand                           |                                  |                           | •                     |     |
| Advance<br>filtering | Read alignment 5' end includes<br>forward primer | •                                | •                         |                       |     |
|                      | Read alignment 3' end includes<br>reverse primer | •                                | •                         |                       |     |

---

|                                           |   |     |
|-------------------------------------------|---|-----|
| Read alignment 5' end includes            |   |     |
| forward primer and 3' end includes        | • | •   |
| reverse primer                            |   |     |
| Paired read including at least one primer |   |     |
| in each have same leader-TRS junction     | • | •   |
| in alignments                             |   |     |
| Read alignment 3' with > 1 ployA          |   | • • |
| Read alignment 3' with > 5 ployA          |   | • • |

---

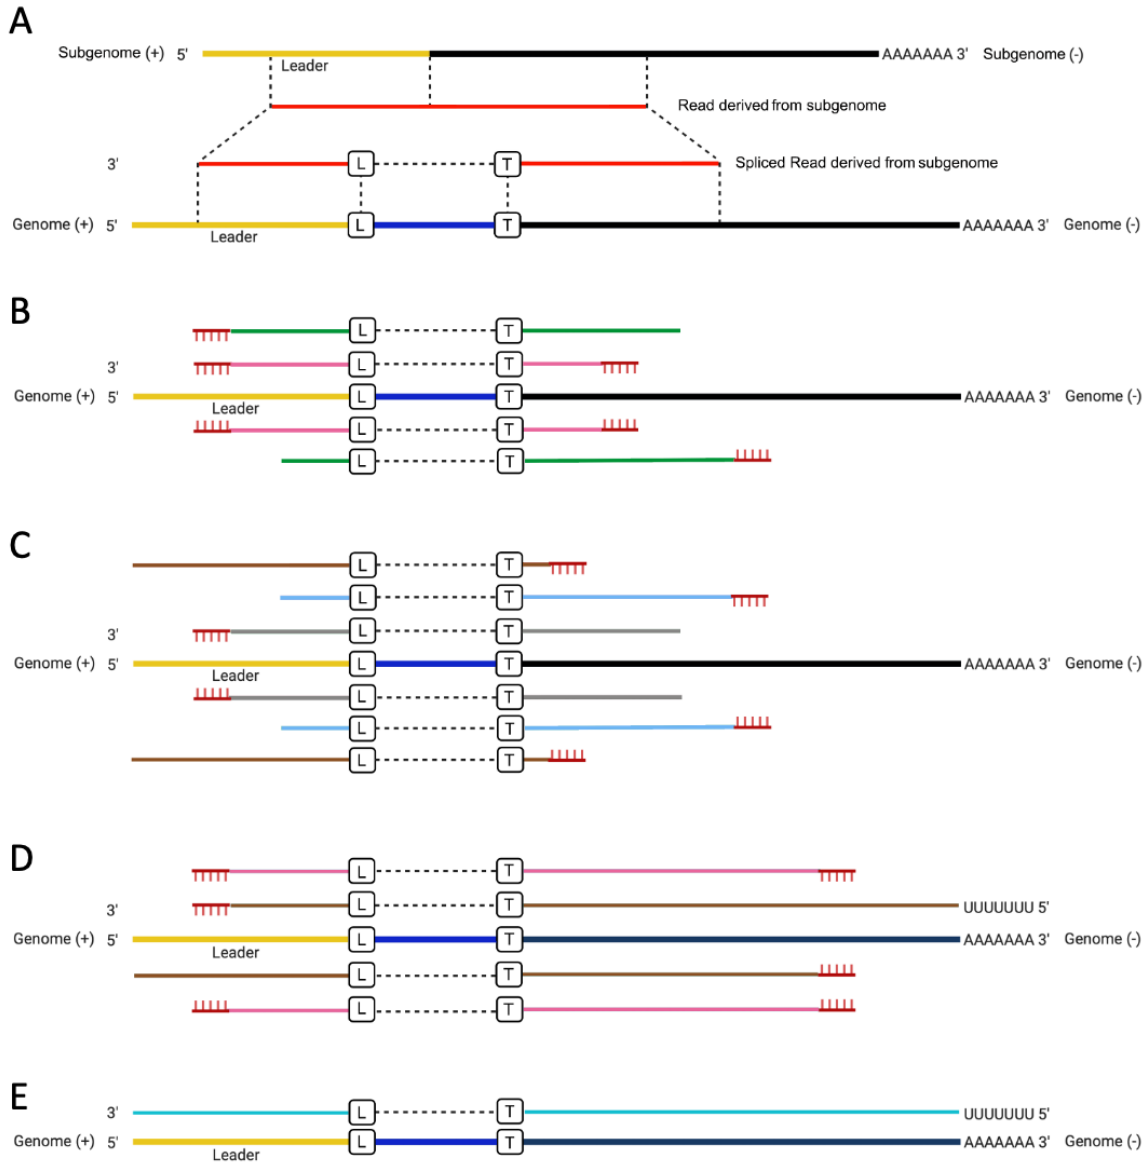

Figure 1. (A) Illustration of reads derived from sgRNAs mapped onto the SARS-CoV-2 reference genome with a splicing method. Illustration of the possible type of reads mapped on the SARS-CoV-2 reference genome for the (B and C) paired end Illumina cDNA amplicon sequencing, where the lines with same colour implied paired reads, (D) Nanopore cDNA amplicon sequencing and (E) Nanopore direct RNA sequencing of SARS-CoV-2 genome. L and B in the boxes indicate the leader-TRS breaking sites on the leader side and TRS side, respectively.

**A**

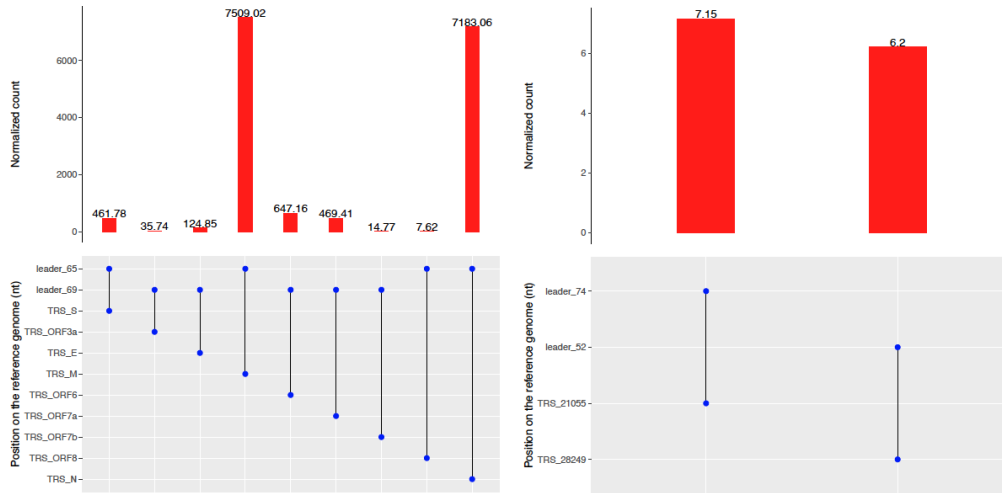

**B**

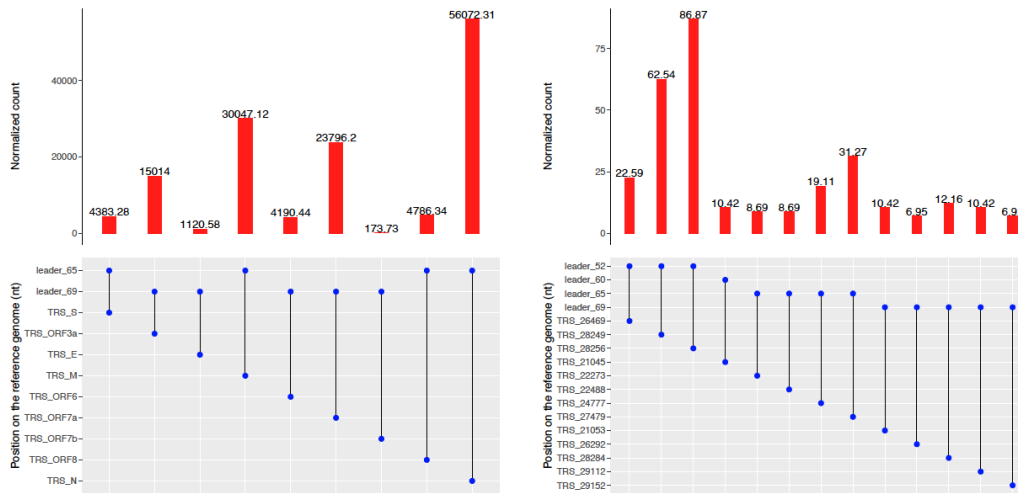

**C**

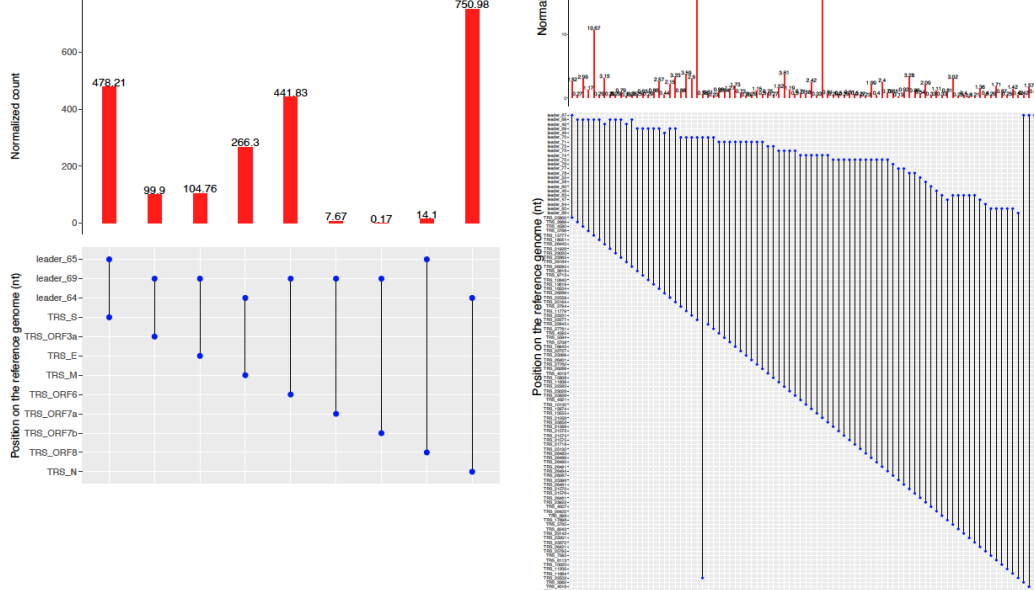



Figure 2. Analysis of leader TRS-gene junctions of reads with at least one primer sequence at either end in sequencing data from cell culture from (A) VeroE6 cells infected with SARS-CoV-2 (England/2/2020) and sequenced using an ARTIC Nanopore approach<sup>16</sup> and (B) direct RNA sequencing of Cero CCL81 cells in culture infected with SARS-CoV-2 (National Culture Collection for Pathogens, Korea National Institute of Health, Korea)<sup>2</sup>. (C) Vero E6 cells were also infected with a near clinical isolate of known provenance and sequenced using the ARTIC Illumina approach.

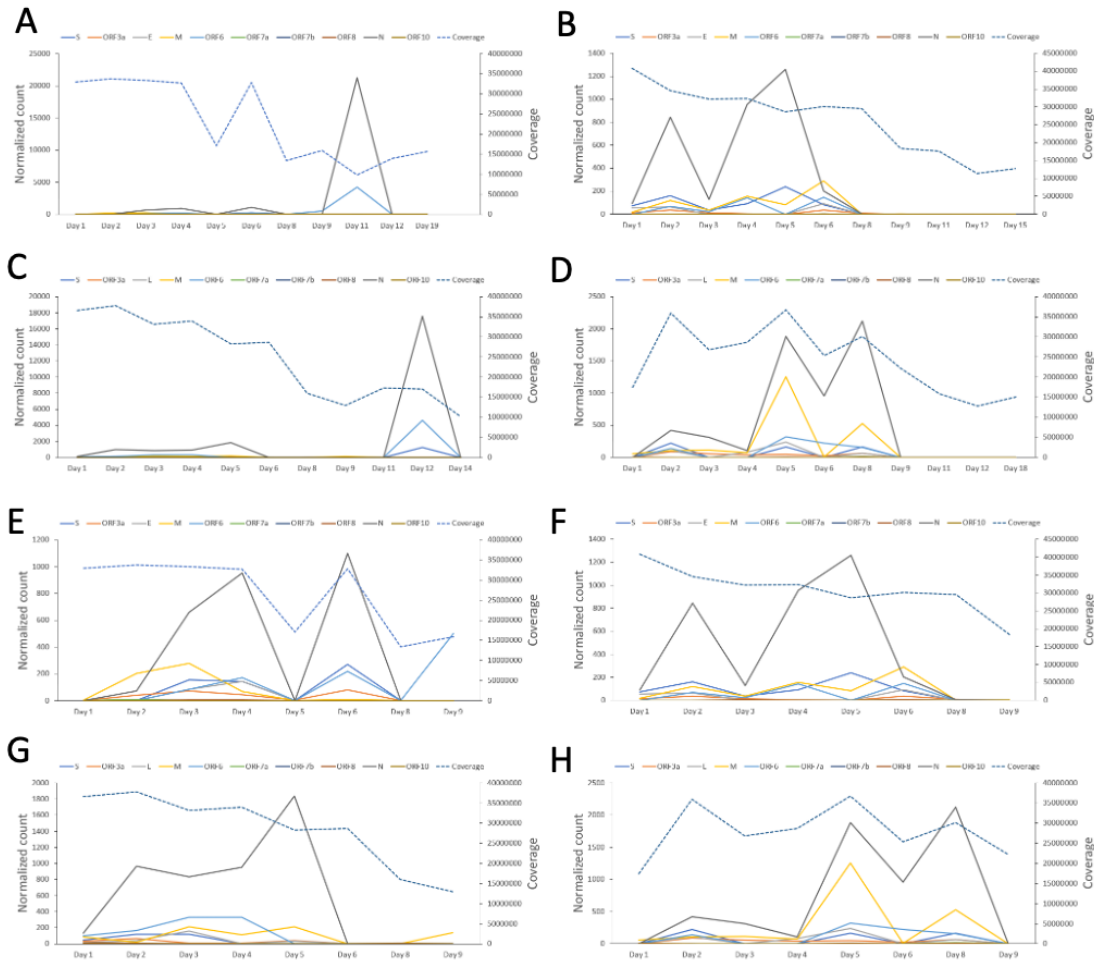

Figure 3. Analysis of leader TRS-gene junction abundance of reads with at least one primer sequence at either end in longitudinal nasopharyngeal samples (daily indicated on the x-axis) taken from two non-human primate models of SARS-CoV-2 in groups. The normalised count (Read count/total number of reads mapped on the reference genome)\*1,000,000) of the leader TRS-gene junction abundance is shown on the left-hand Y-axis with each unique junction colour coded. The right-hand Y axis is a measure of the total depth of coverage for SARS-CoV-2 in that sample. Note the two scales are different. SARS-CoV-2 was amplified using the ARTIC approach and sequenced by Illumina. The data is organised into groups of animals for the cynomolgus macaque groups 1 and 2 (A/E and B/F), and rhesus macaque groups 1 and 2 (C/G and D/H). E, F,

G and H zoom in to see the details of A, B, C and D for Day1 to Day9. The data correspond to Supplementary Table 9.

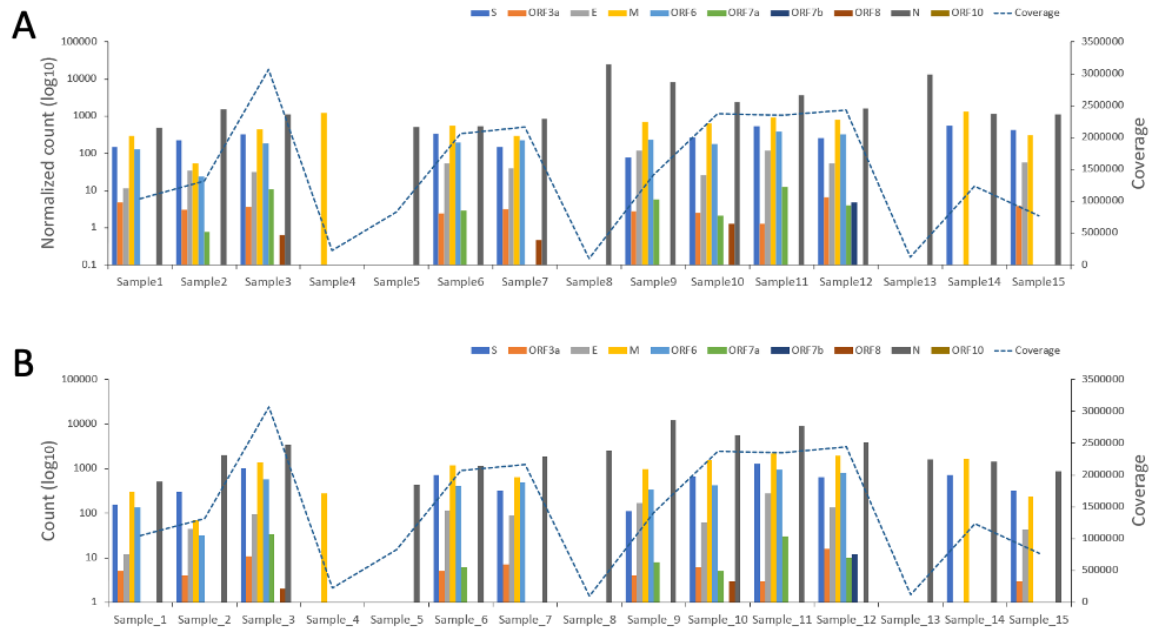

Figure 4. Plots of normalised peak counts (A) and peak counts (B) of leader-TRS gene junctions of reads with at least one primer sequences at either end derived from sequence data from 15 human patients. These were sequenced with the ARTIC pipeline via Illumina. The data correspond to Supplementary Table 7.

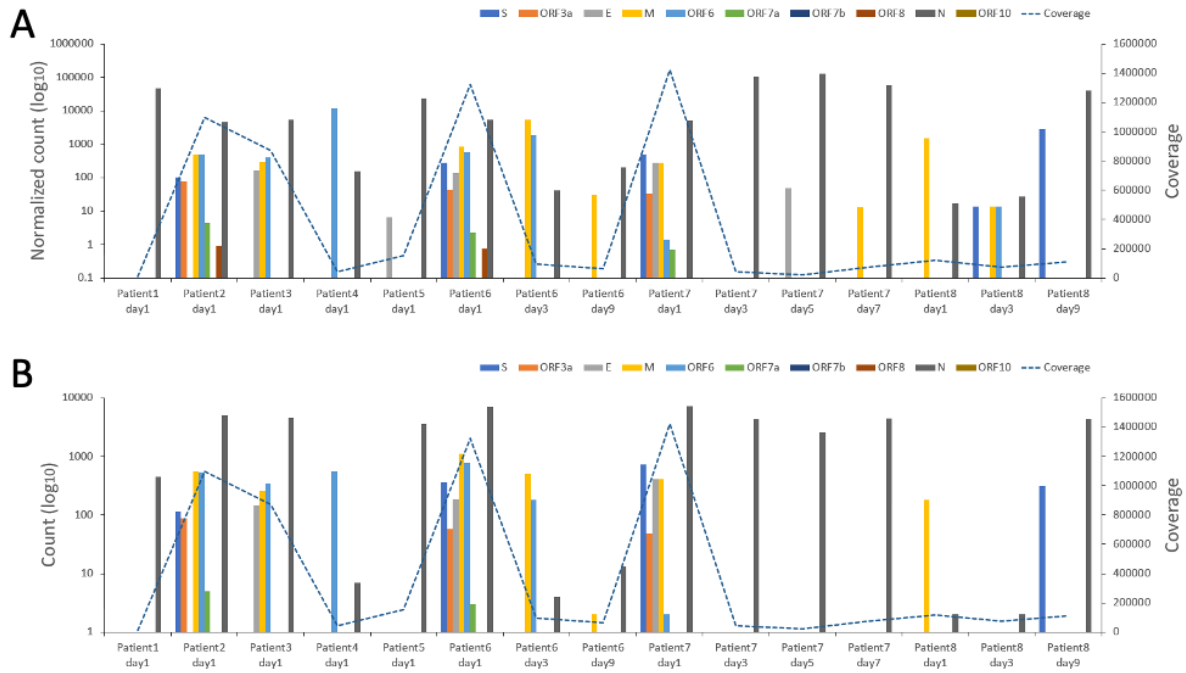

Figure 5. Plots of normalised peak counts (A) and peak counts (B) of leader-TRS gene junctions of reads with at least one primer sequence at either end derived from sequence data from 15 human patients. Some of these samples are longitudinal as indicated by the patient number and day post admission the sample was taken. These were sequenced with the ARTIC pipeline via Nanopore. The data correspond to Supplementary Table 10.

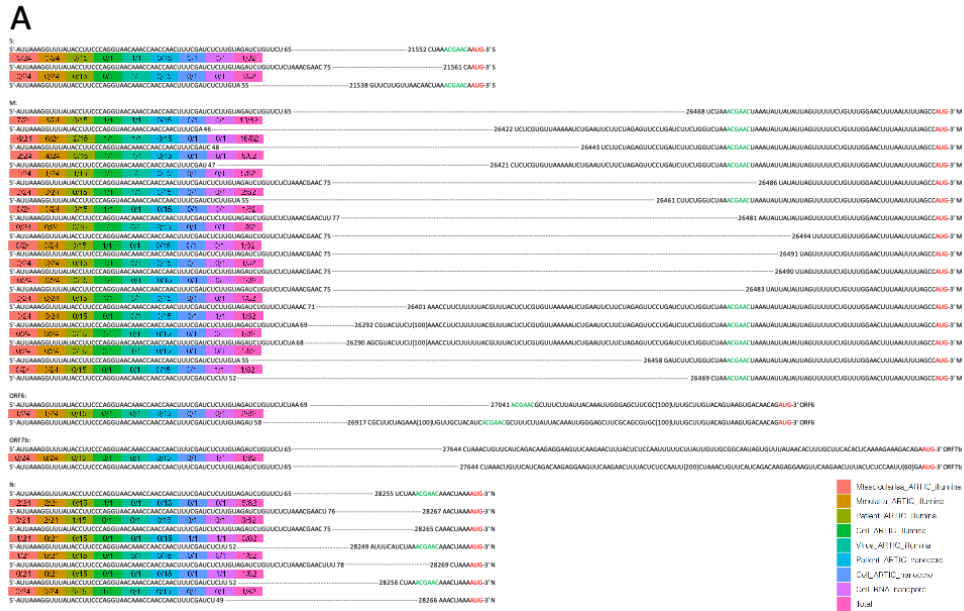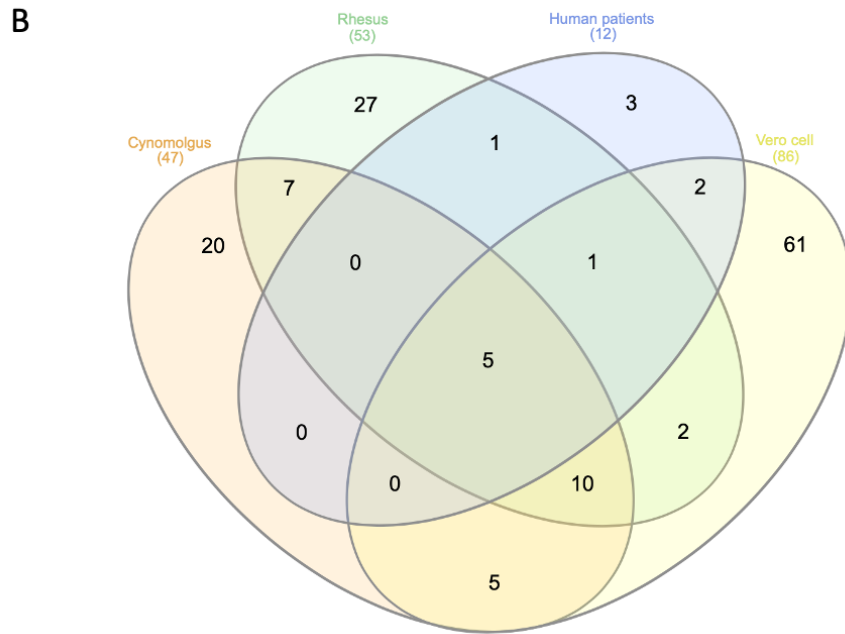

Figure 6. (A). Diagram of novel leader-TRS junctions centred around the known gene orf but out of the search interval in the analysis of cell culture, non-human primate and human sequencing data. Many novel junctions map to the leader-TRS membrane gene junctions. (B). Venn diagram showing the overlap of novel leader-TRS gene junctions among cynomolgus and rhesus macaques,

human patients, and infected Vero cells all sequenced with the ATRIC Illumina method (Supplementary Table 11).

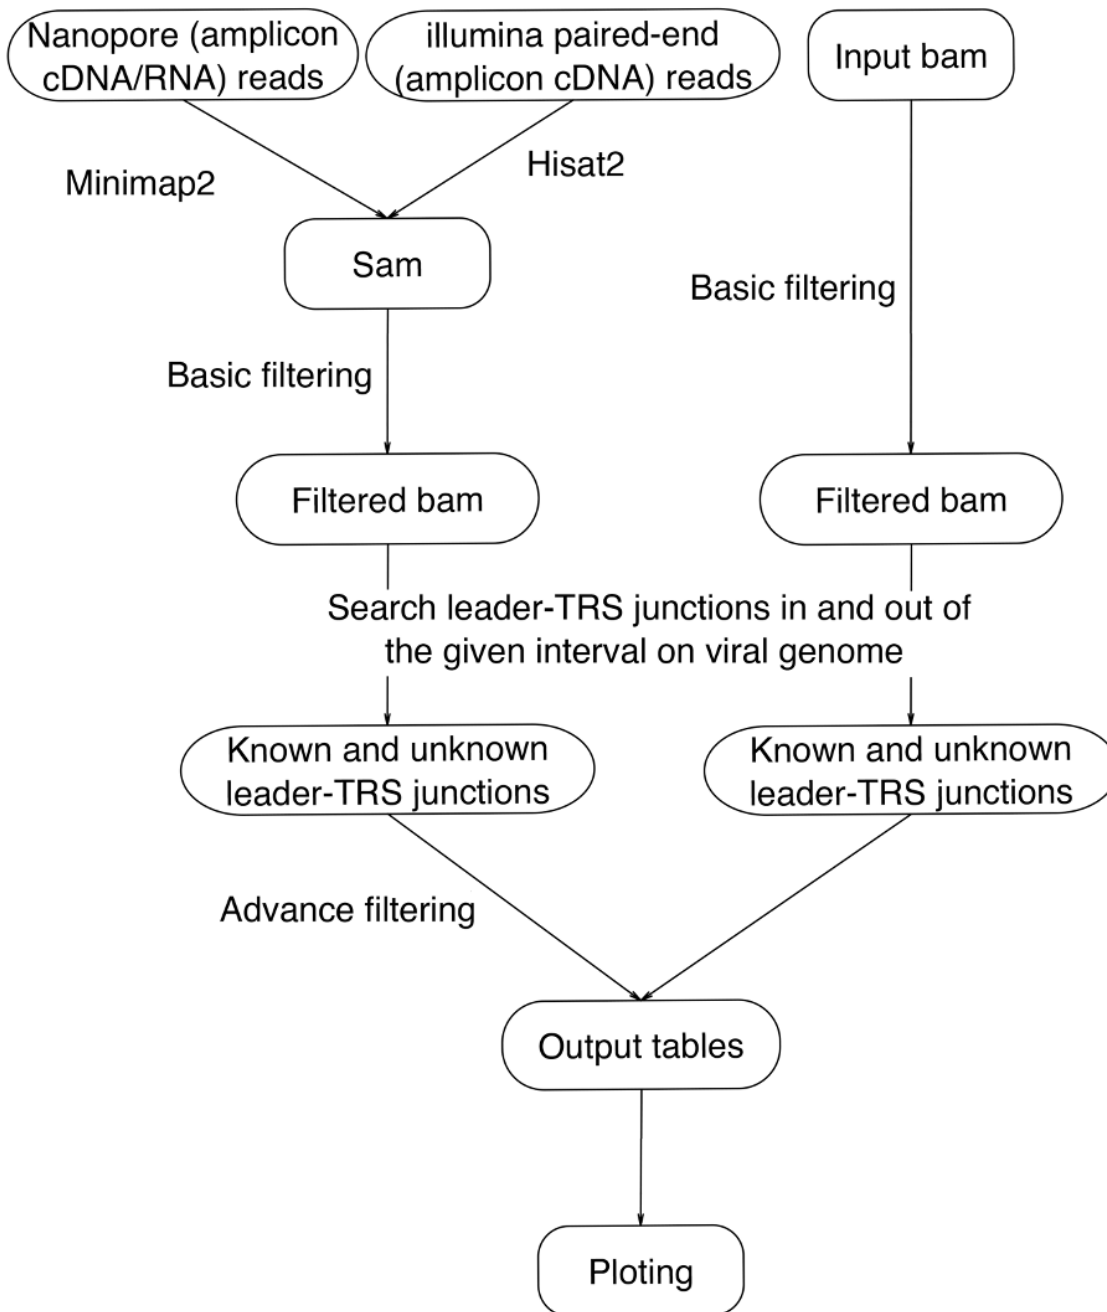

Supplementary Figure 1. Bioinformatics pipeline for the identification of leader-TRS junctions in sequencing data from SARS-CoV-2 infected material with LeTRS. This can be rapidly adapted for other coronaviruses. LeTRS can work from Nanopore or Illumina amplicon data or more unbiased approaches such as metagenomic or Illumina sequencing by using a BAM file.



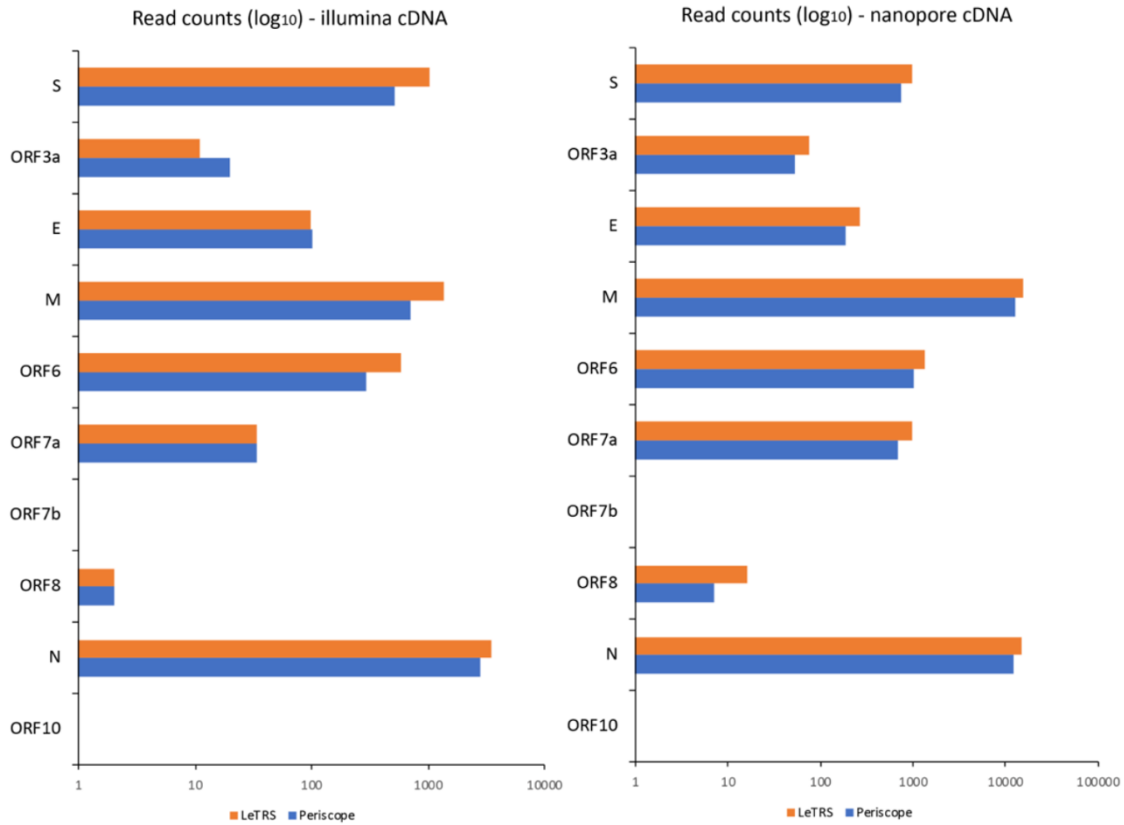

Supplementary Figure 2. Comparison of LeTRS to Periscope with the Illumina (left) and Nanopore (right) ARTIC amplicon sequencing test data sets by using the number of reads with at least one primer sequences at either end in LeTRS and the number of “High Quality” reads (the reads with both 32 nts leader sequences and known TRS-orf boundary) in Periscope.

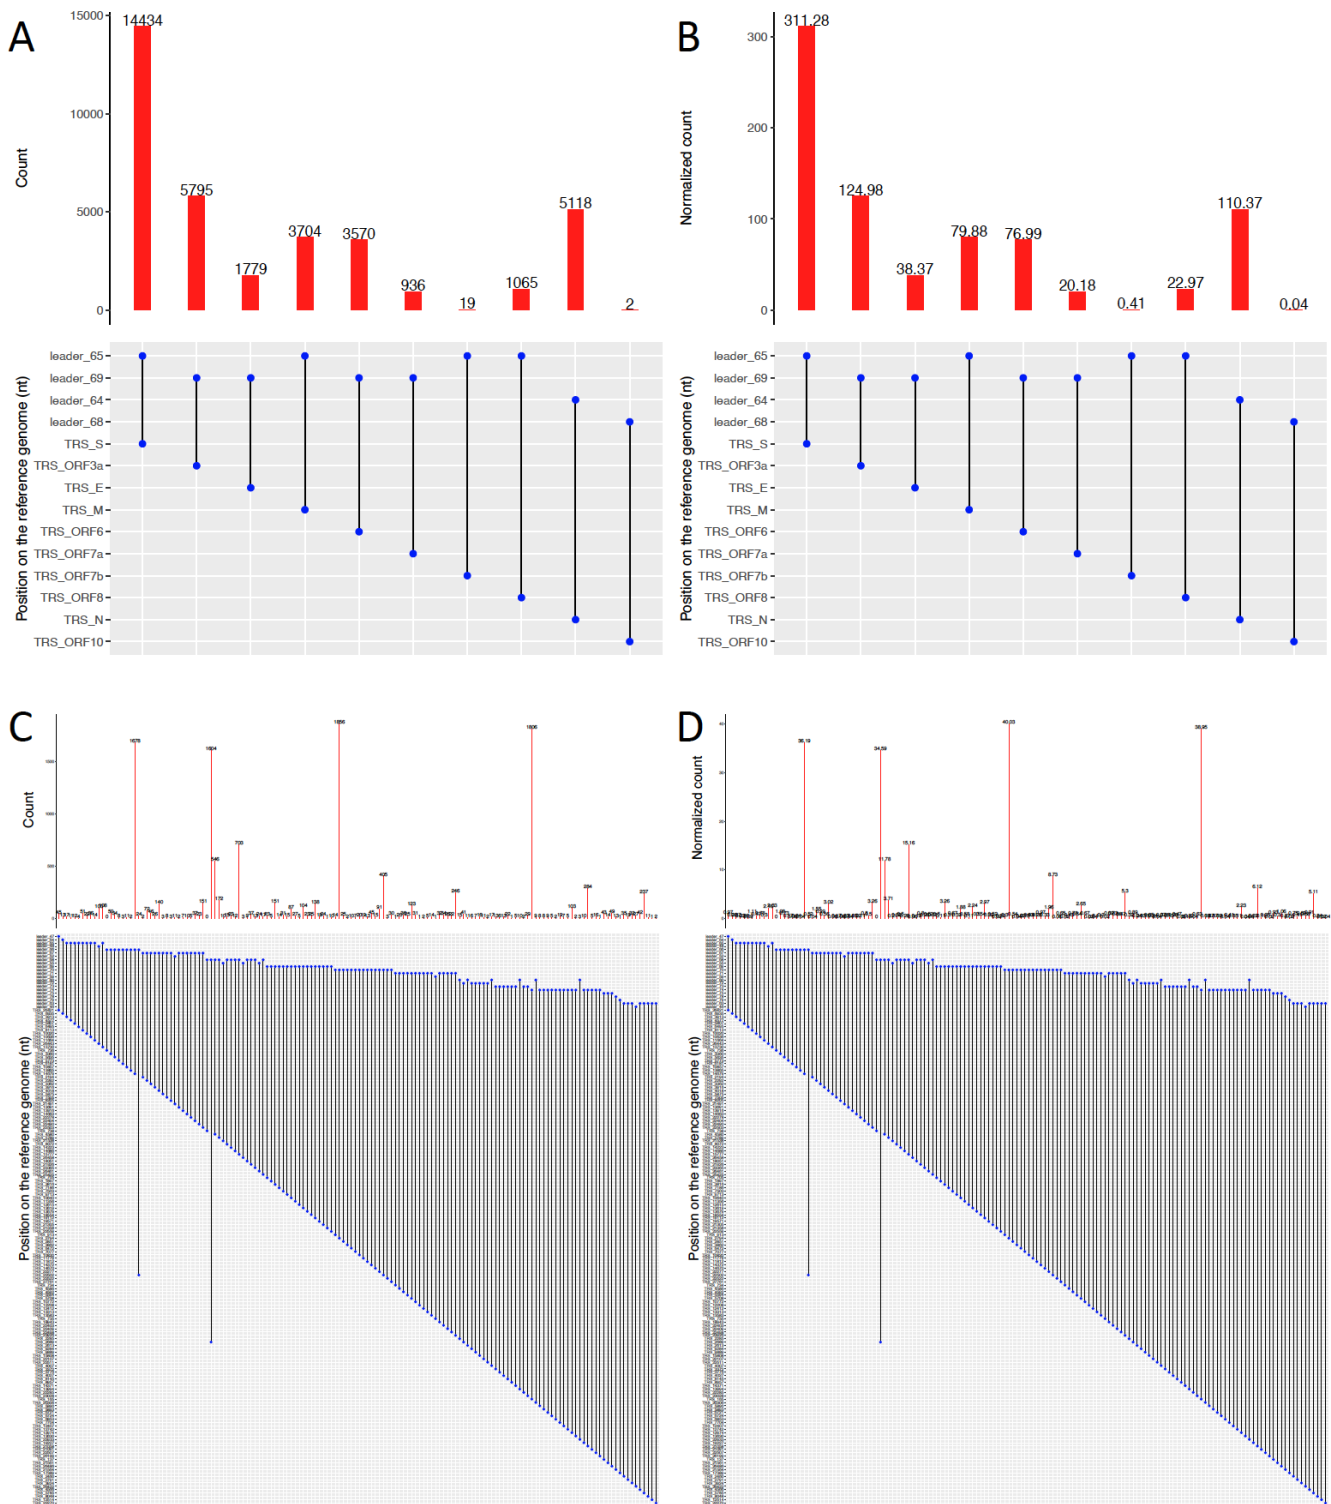

Supplementary Figure 3. Raw (A and C) and normalised (B and D) expected (upper) and novel (lower) leader-TRS gene junctions count in the infecting SARS-CoV-2 inoculum source used for NHP study, sequenced by Illumina ARTIC method (Supplementary Table 8).



Supplementary Figure 4. Novel leader-TRS gene junctions identified for cynomolgus macaques (Supplementary Table 9). The number before “-Day” indicated the group of cynomolgus macaques.

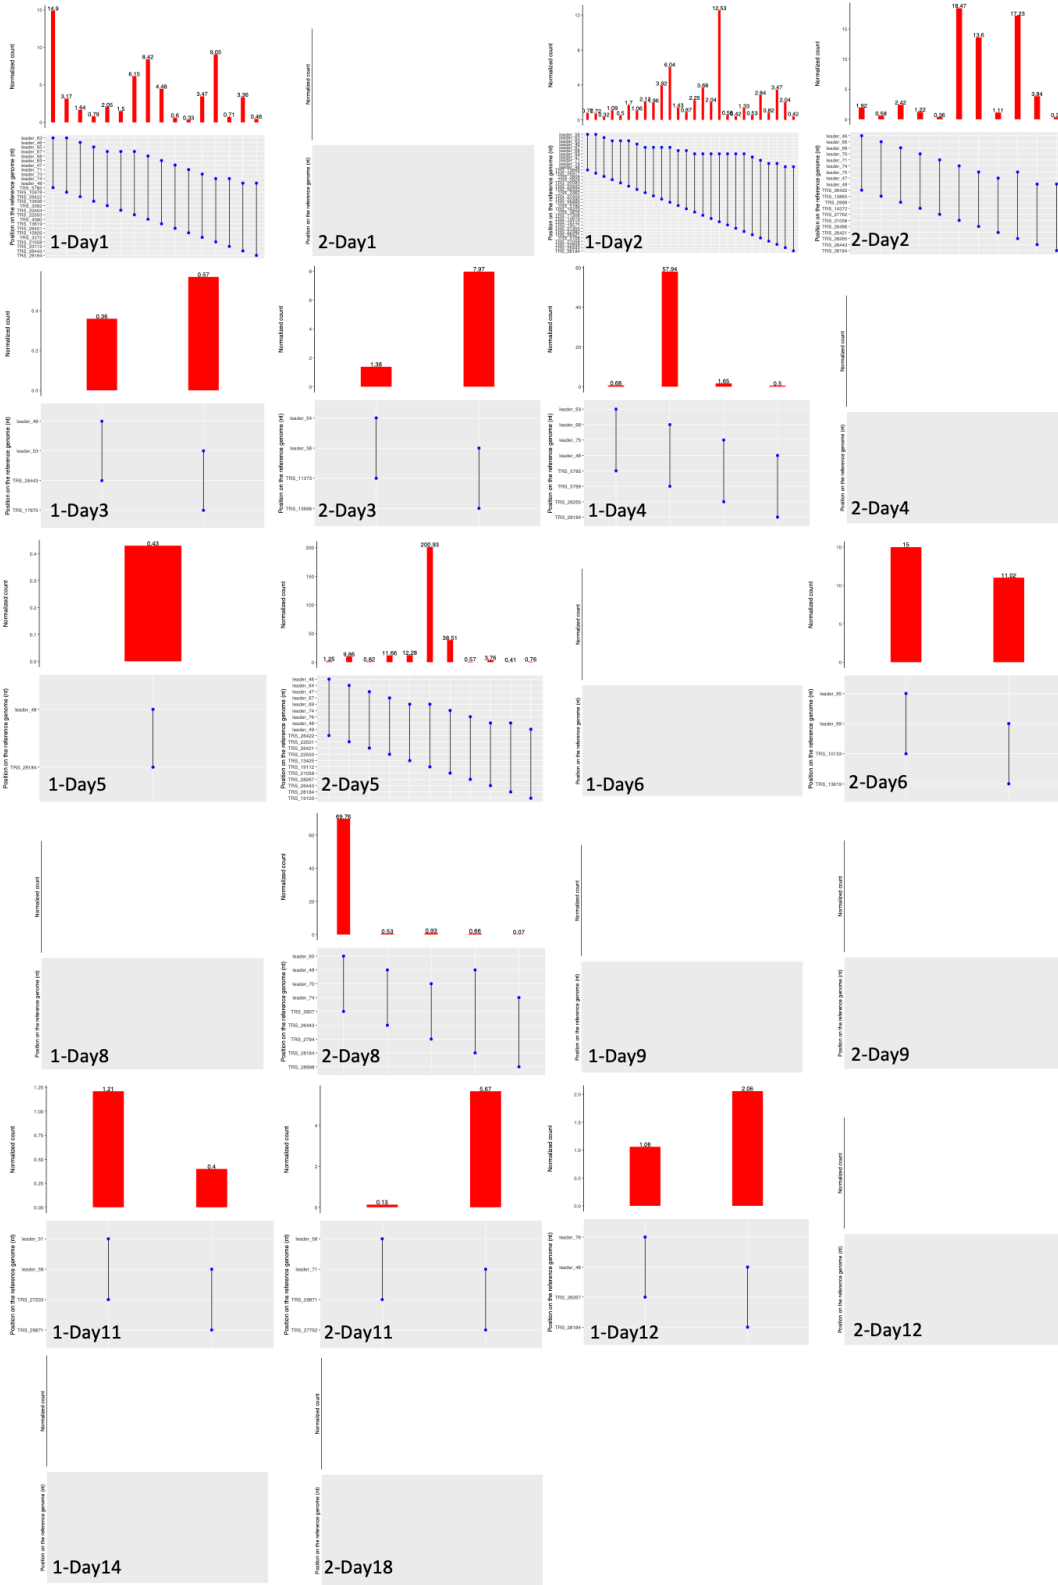

Supplementary Figure 4. Novel leader-TRS gene junctions identified for rhesus macaques (Supplementary Table 9). The number before “-Day” indicated the group of cynomolgus macaques.

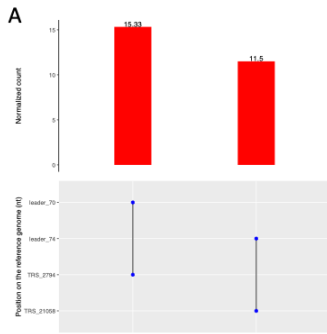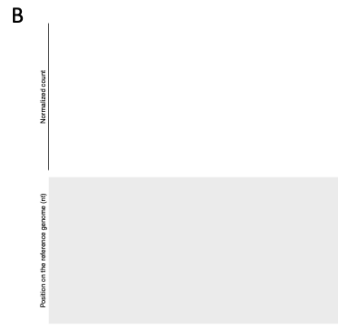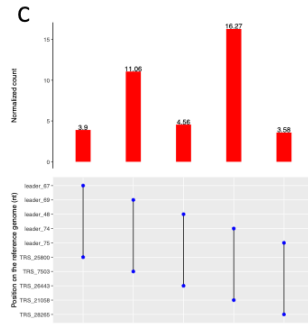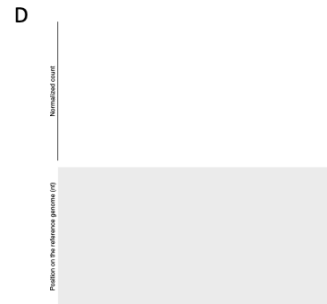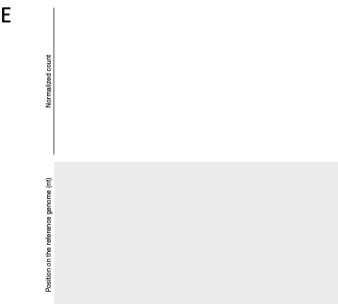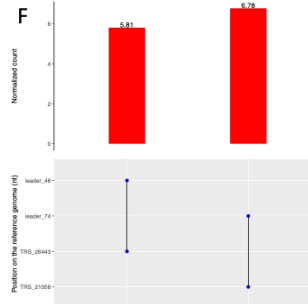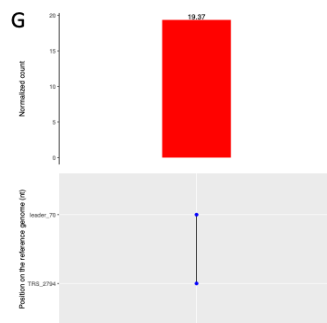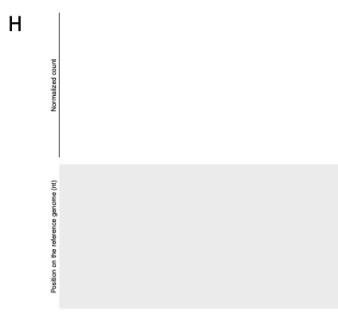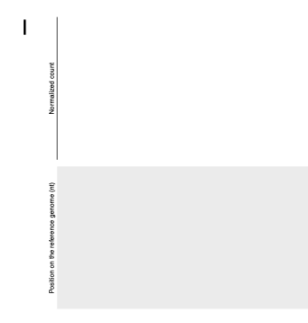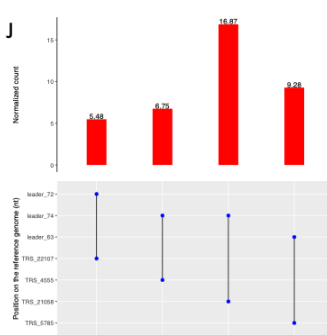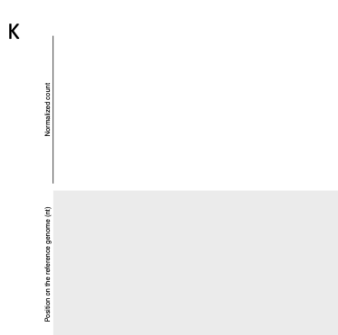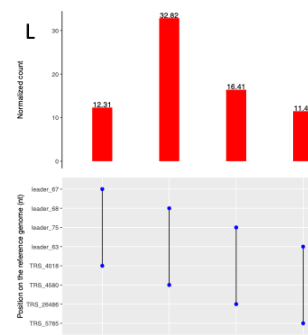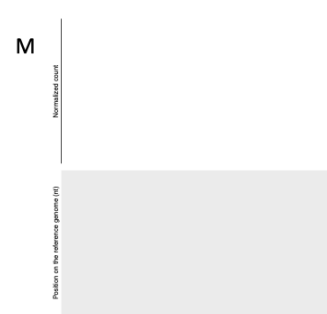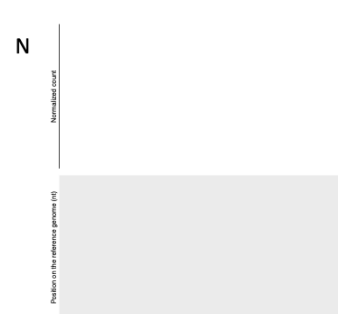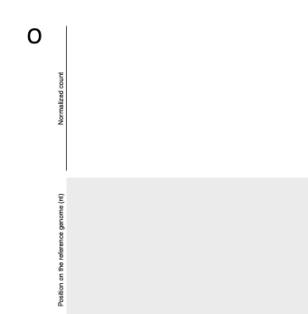

Supplementary Figure 5. Novel leader-TRS gene junctions identified in nasopharyngeal swabs from human patients sequenced using the ARTIC-Illumina approach (Supplementary Table 7).



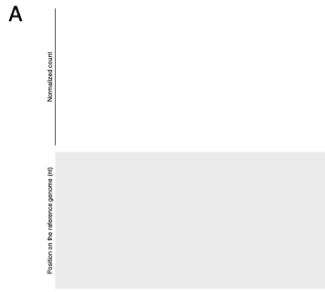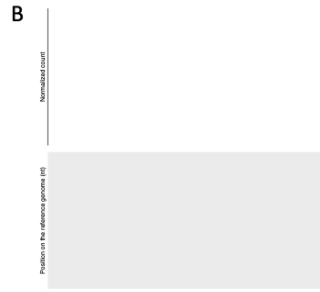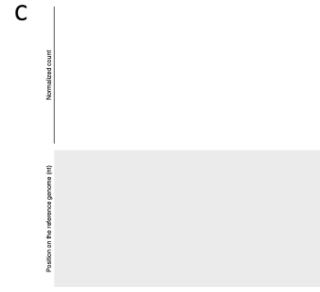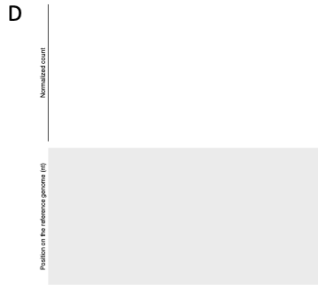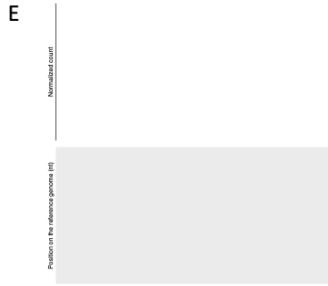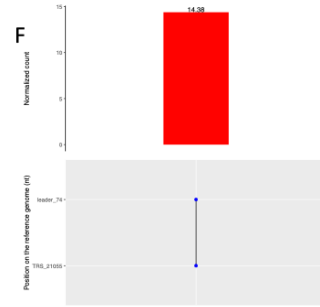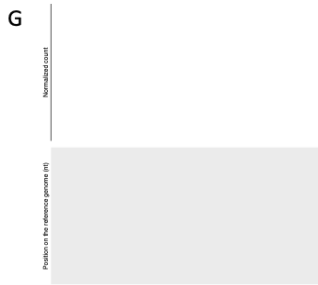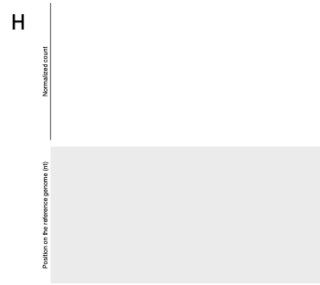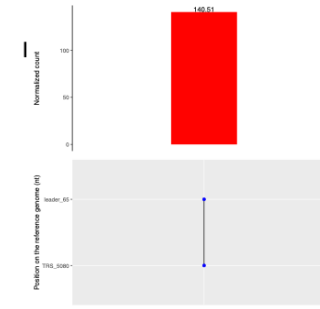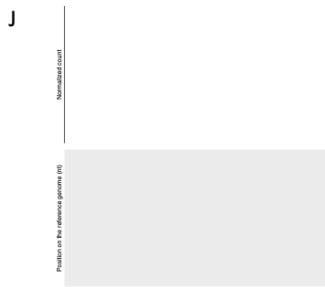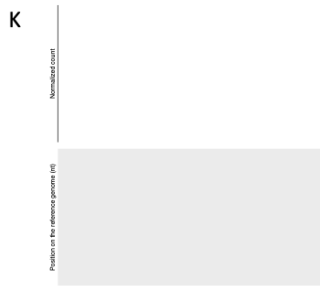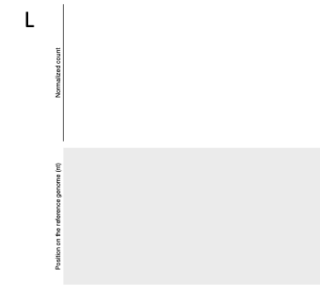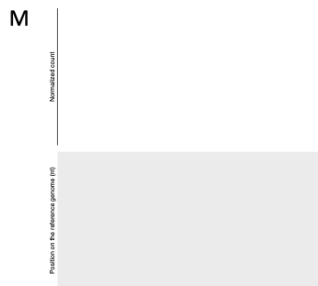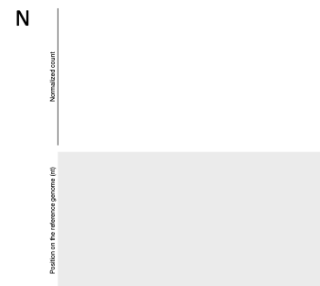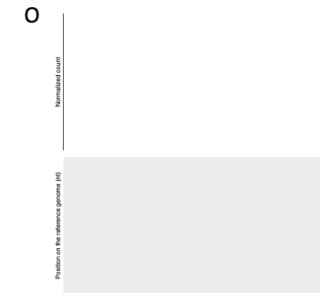

Supplementary Figure 6. Novel leader-TRS gene junctions identified in nasopharyngeal swabs from human patients sequenced using the ARTIC-Nanopore approach (Supplementary Table 10).

#### Supplementary data

Table S1. The LeTRS output table for details of known sgmRNA in the tested Nanopore ARTIC v3 primers amplicon sequencing data. “peak\_leader” and “peak\_TRS\_start” point to the leader-TRS junctions in Table 1, “ACGAAC” indicates if there is a ACGAAC sequence in the “TRS\_seq” (TRS sequences), “20\_leader\_seq” refers to the 20 nucleotides before the end of leader, and “AUG\_postion” and “first\_orf\_aa” refer to the first AUG position and translated orf of the sgmRNA.

Table S2. The LeTRS output table for details of novel sgmRNA in the tested Nanopore ARTIC v3 primers amplicon sequencing data. “peak\_leader” and “peak\_TRS\_start” point to the leader-TRS junctions in Table 2, “ACGAAC” indicates if there is a ACGAAC sequences in the “TRS\_seq” (TRS sequences), “20\_leader\_seq” refers to the 20 sequences before the end of the leader, “AUG\_postion” and “first\_orf\_aa” refer to the first AUG position and translated orf of the sgmRNA, and “known\_ATG” indicates if the first AUG position is the same as a known sgmRNA.

Table S3. The LeTRS output table for details of known sgmRNA in the tested Nanopore direct RNA sequencing data. “peak\_leader” and “peak\_TRS\_start” point to the leader-TRS junctions in Table 3, “ACGAAC” indicates if there is a ACGAAC sequence in the “TRS\_seq” (TRS sequences),

“20\_leader\_seq” refers to the 20 nucleotides before the end of leader, and “AUG\_postion” and “first\_orf\_aa” refer to the first AUG position and translated orf of the sgmRNA.

Table S4. The LeTRS output table for details of novel sgmRNA in the tested nanopore direct RNA sequencing data. “peak\_leader” and “peak\_TRS\_start” point to the leader-TRS junctions in Table 4, “ACGAAC” indicates if there is a ACGAAC sequences in the “TRS\_seq” (TRS sequences), “20\_leader\_seq” refers to the 20 nucleotides before the end of leader, “AUG\_postion” and “first\_orf\_aa” refer to the first AUG position and translated orf of the sgmRNA, and “known\_AUG” indicates if the first AUG position is the same as a known sgmRNA.

Table S5. The LeTRS output table for details of known sgmRNA in the tested Illumina ARTIC v3 primers amplicon sequencing data. “peak\_leader” and “peak\_TRS\_start” point to the leader-TRS junctions in Table 7, “ACGAAC” indicates if there is a ACGAAC sequence in the “TRS\_seq” (TRS sequences), “20\_leader\_seq” refers to the 20 nucleotides before the end of leader, and “ATG\_postion” and “first\_orf\_aa” refer to the first AUG position and translated orf of the sgmRNA.

Table S6. The LeTRS output table for details of novel sgmRNA in the tested Illumina ARTIC v3 primers amplicon sequencing data. “peak\_leader” and “peak\_TRS\_start” point to the leader-TRS junctions in Table 8, “ACGAAC” indicates if there is a ACGAAC sequences in the “TRS\_seq” (TRS sequences), “20\_leader\_seq” refers to the 20 nucleotides before the end of leader,

“AUG\_postion” and “first\_orf\_aa” refer to the first AUG position and translated orf of the sgmRNA, and “known\_AUG” indicates if the first AUG position same as a known sgmRNA.

Table S7. Leader-TRS gene junctions of reads with at least one primer sequence derived from sequence data from 15 human patients sequenced with the ARTIC pipeline via Illumina.

Table S8. Leader-TRS gene junction count in the infecting SARS-CoV-2 inoculum source used for the NHP study, sequenced by Illumina ARTIC method.

Table S9. Analysis of leader TRS-gene junction, abundance of reads with at least one primer sequence at either end in longitudinal nasopharyngeal samples taken from two non-human primate models (cynomolgus and rhesus macaques) of SARS-CoV-2 in groups. SARS-CoV-2 was amplified using the ARTIC approach and sequenced by Illumina. The data is organised into groups of animals for the cynomolgus macaque groups 1 and 2 that were with “-1” and “-2” in the excel sheets.

Table S10. leader-TRS gene junctions of reads with at least one primer sequence derived from sequence data from 15 human patients sequenced with the ARTIC pipeline via Nanopore.

Table S11. Novel leader-TRS junctions centred around the known gene open reading frame but out of the search interval in the analysis of cell culture, non-human primate and human sequencing data.

| subgenome | peak_leader_end | peak_TRS_start | ACGAAC | ATG_postion |
|-----------|-----------------|----------------|--------|-------------|
| S         | 65              | 21552          | yes    | 21563       |
| ORF3a     | 69              | 25385          | yes    | 25393       |
| E         | 69              | 26237          | yes    | 26245       |
| M         | 65              | 26469          | yes    | 26523       |
| ORF6      | 69              | 27041          | yes    | 27202       |
| ORF7a     | 69              | 27388          | yes    | 27394       |
| ORF7b     | 69              | 27755          | no     | 27756       |
| ORF8      | 65              | 27884          | yes    | 27894       |
| N         | 65              | 28256          | yes    | 28274       |

| 20_leader_seq        | TRS_seq                            |
|----------------------|------------------------------------|
| ATCTCTTGTAGATCTGTTCT | CTAAACGAACA                        |
| CTTGTAGATCTGTTCTCTAA | ACGAACTT                           |
| CTTGTAGATCTGTTCTCTAA | ACGAACTT                           |
| ATCTCTTGTAGATCTGTTCT | CTAAACGAACTAAATATTATATTAGTTTTTCTG1 |
| CTTGTAGATCTGTTCTCTAA | ACGAACGCTTTCTTATTACAAATTGGGAGCTTC  |
| CTTGTAGATCTGTTCTCTAA | ACGAAC                             |
| CTTGTAGATCTGTTCTCTAA | A                                  |
| ATCTCTTGTAGATCTGTTCT | CTAAACGAAC                         |
| ATCTCTTGTAGATCTGTTCT | CTAAACGAACAAACTAAA                 |

first\_orf\_aa

MFVFLVLLPLVSSQCVNLTRTQLPPAYTNSFTRGVVYYPDKVFRSSVLHSTQDLFLPFFSNVTWFHAIHV  
MDLFMRIFTIGTVTLKQGEIKDATPSDFVRATATIPIQASLPFGWLIVGVALLAVFQSASKIITLKKRWQLA  
MYSFVSEETGLIVNSVLLFLAFVVFLVTLAILTALRLCAYCCNIVNVSLVKPSFYVYSRVKNLNSSRVPDLI  
MADSNGTITVEELKKLLEQWNLVIGFLFTWICLLQFAYANRNRFLYIIKLIFLWLLWPVTLACFVLAAYVF  
MFHLVDFQVTIAEILLIIMRTFKVSIWNLDYIINLIKNLSKSLTENKYSQLDEEQPMEID\*  
MKIILFLALITLATCELYHYQECVRGTTVLLKEPCSSGTYEGNSPFHPLADNKFALTCFSTQFAFACPDGVK  
MIELSLIDFYLCFLAFLLFLVLIIMLIIFWFSLELQDHNETCHA\*  
MKFLVFLGIITTVAAFHQECSLQSQCTQHQPYYVDDPCPIHFYSKWYIRVGARKSAPLIELCVDEAGSKSPI  
MSDNGPQNQRNAPRITFGGSPDSTGSNQNNGERSGARSKQRRPQGLPNNTASWFTALTQHGKEDLKF



SGTNGTKRFDNPVLPFNDGVYFASTEKSNIIRGWIFGTTLDSKTQSLIVNNATNVVIKVCEFQFCNDPFLGVY  
ALSQGVHFVCNLLLLFVTVYSHLLLVAAGLEAPFLYLYALVYFLQSINFVRIIMRLWLCWKCRSKNPLLYDANYFL  
LV\*

RINWITGGIAIAMAQLVGLMWLSYFIASFRLFARTRSMWSFNPETNILLNVPLHGTILTRPPLLESELVIGAVILRG

HVYQLRARSVSPKLFIRQEEVQELYSPIFLIVAAIVFITLCFTLKRKTE\*

QYIDIGNYTVSCLPFTINCQEPKLGSLVVRCSFYEDFLEYHDVRVVLDFI\*

PRGQGVPIINTNSSPDDQIGYYRRATRRIRGGDGKMKDLSRWYFYLLGTGPEAGLPYGANKDGIWVATEG

YHKNNKSWMESEFRVYSSANNCTFEYVSQPFLMDLEGKQGNFKNLREFVFKNIDGYFKIYSKHTPINLVRDLP  
CWHTNCYDYCIPYNSVTSSIVITSGDGTTSPISEHDYQIGGYTEKWESGVKDCVVLHSYFTSDYYQLYSTQLSTE

HLRIAGHHLGRCDIKDLPKEITVATSRTLSYYKLGASQRVAGDSGFAAYSRYRIGNYKLNTDHSSSDNIALLVQ

ALNTPKDHIGTRNPANNAIVLQLPQGTTLPKGFYAEGSRGGSQASSRSSSRNSSRNSTPGSSRGTSARM

QGFSALEPLVDLPIGINITRFQTLALHRSYLTPGDSSSGWTAGAAAYVGYLQPRTFLLKYNENGTITDAVDC/  
DTGVEHVTFIYNKIVDEPEEHVQIHTIDGSSGVVNPVMEPIYDEPTTTTSVPL\*

.\*

1AGNGGDAALALLLDRLNQLESKMSGKGQQQGGQTVTKKSAAEASKKPRQKRTATKAYNVTQAFGRRGPI

ALDPLSEKCTLKSFTVEKGIYQTSNFRVQPTESIVRFPNITNLCPFGEVFNATRFASVYAWNRRKRISNCVADYS\

EQTQGNFGDQELIRQGTDYKHWPQIAQFAPSASAFFGMSRIGMEVTPSGTWLTYTGAIKLDDKDPNFKDQ\

/LYNSASFSTFKCYGVSPTKLNLCFTNVYADSFVIRGDEVQRQIAPGQTGKIADYNYKLPDDFTGCVIAWNSN

/ILLNKHIDAYKTFPPTEPKDKKKKKADETQALPQRQKKQQTVTLLPAADLDDFSKQLQQSMSSADSTQA\*

∩LDSKVGGNYNYLYRLFRKSNLKPFERDISTEIYQAGSTPCNGVEGFNCYFPLQSYGFQPTNGVGYQPYRVVVL

.SFELLHAPATVCGPKKSTNLVKNKCVNFNFNGLTGTGVLTESNKKFLPFQQFGRDIADTTDAVRDPQTLEILD

ITPCSFGGVSVITPGTNTSNQVAVLYQDVNCTEVPVAIHADQLTPTWRVYSTGSNVFQTRAGCLIGAEHVNN



SYECDIPIGAGICASYQTQTNSPRRARSVASQSIAYTMSLGAENSVAYSNNSIAIPTNFTISVTTEILPVSMTKTS

SDCTMYICGDSTECNLLLQYGSFCTQLNRALTGIAVEQDKNTQEVFAQVKQIYKTPPIKDFGGFNFSQILPDI

PSKPSKRSFIEDLLFNKVTLADAGFIKQYGDCLGDIAARDLICAQKFNGLTVLPPLLTDEMIAQYTSALLAGTITS

3WTFGAGAALQIPFAMQMAYRFNGIGVTQNVLYENQKLIANQFNSAIGKIQDLSSTASALGKLQDVVNQN

AQALNTLVKQLSSNFGAISSVLNDILSRDKVEAEVQIDRLITGRLQSLQTYVTQQLIRAAEIRASANL

| subgenome | peak_leader_peak_TRS_start | ACGAAC | ATG_position | known_ATG |
|-----------|----------------------------|--------|--------------|-----------|
| 1         | 74                         | 21055  | no           | 21071 -   |
| 2         | 52                         | 28249  | yes          | 28274 N   |

| 20_leader_seq        | TRS_seq                 | first_orf_aa             |
|----------------------|-------------------------|--------------------------|
| AGATCTGTTCTCTAAACGAA | GACCCTAAGACTAAAA        | MLQKKMTLKRVSFLTFVGLYNKS* |
| CAACCAACTTTCGATCTCTT | ATTTCATCTAAACGAACAAACTA | MSDNGPQNQRNAPRITFGGPSDS  |

TGSNQNGERSGARSKQRRPQGLPNNTASWFTALTQHGKEDLKFPARGQGVPINTNSSPDDQIGYYRRATRII



RGDGKMKDLSRWYFYLLGTGPEAGLPYGANKDGIWVATEGALNTPKDHIGTRNPANNAIVLQLPQGT

TLPKGFYAEGRGGSQASSRSSRSRNSSRNSTPGSSRGTS PARMAGNGGDAALALLLDRLNQLESKMSGK

:GQQQGQTVTKKSAAEASKKPRQRTATKAYNVTQAFGRRGPEQTQGNFGDQELIRQGTDYKHWPQIAQ

!FAPSASAFFGMSRIGMEVTPSGTWLTYTGAIKLDDKDPNFKDQVILLNKHIDAYKTFPPTEPKDKKKKADET

QALPQRQKKQQTVTLLPAADLDDFSKQLQQSMSSADSTQA\*

| subgenome | peak_leader_ | peak_TRS_start | ACGAAC | ATG_position |
|-----------|--------------|----------------|--------|--------------|
| S         | 65           | 21552          | yes    | 21563        |
| ORF3a     | 69           | 25385          | yes    | 25393        |
| E         | 69           | 26237          | yes    | 26245        |
| M         | 65           | 26469          | yes    | 26523        |
| ORF6      | 69           | 27041          | yes    | 27202        |
| ORF7a     | 69           | 27388          | yes    | 27394        |
| ORF7b     | 69           | 27755          | no     | 27756        |
| ORF8      | 65           | 27884          | yes    | 27894        |
| N         | 65           | 28256          | yes    | 28274        |

20\_leader\_seq

ATCTCTTAGATCTGTTCT  
CTTAGATCTGTTCTCTAA  
CTTAGATCTGTTCTCTAA  
ATCTCTTAGATCTGTTCT  
CTTAGATCTGTTCTCTAA  
CTTAGATCTGTTCTCTAA  
CTTAGATCTGTTCTCTAA  
ATCTCTTAGATCTGTTCT  
ATCTCTTAGATCTGTTCT

TRS\_seq

CTAACGAACA  
ACGAACTT  
ACGAACTT  
CTAACGAACTAAATATTATATTAG  
ACGAACTTTCTTATTACAAATTG  
ACGAAC  
A  
CTAACGAAC  
CTAACGAACAACTAAA

first\_orf\_aa

MFVFLVLLPLVSSQCVNLTRTQLPPA  
MDLFMRIFTIGTVTLKQGEIKDATPSC  
MYSFVSEETGLIVNSVLLFLAFVVFL  
MADSNGTITVEELKKLLEQWNLVIGF  
MFHLVDFQVTIAEILLIIMRTFKVSIW  
MKIILFLALITLATCELYHYQECVRGTT  
MIELSLIDFYLCFLAFLFLVLIIMLIIFWF  
MKFLVFLGIITTVAAFHQECSLQSQ  
MSDNGPQNQRNAPRITFGGSPDSTG

AYTNSFTRGVYYPDKVFRSSVLHSTQDLFLPFFSNVTWFHAIHVSGTNGTKRFDNPVLPFNDGVYFASTEK  
DFVRATATIPIQASLPFGWLIVGVALLAVFQSASKIITLKKRWQLALSkgVHFVCNLLLLFVTVYSHLLLVAAG  
VTLAILTALRLCAYCCNIVNVSLVKPSFYVYSRVKNLNSSRVPDLLV\*  
LFLTWICLLQFAYANRRFLYIIKLIFLWLLWPVTLACFVLAAYRINWITGGIAIAMAQLVGLMWLSYFIAS  
VLDYIINLIIKNLSKSLTENKYSQLDEEQPMEID\*  
VLLKEPCSSGTYEgNSPFHPLADNKFALTCFSTQFAFACPDGVKHVYQLRARSVSPKLFIRQEEVQELYSPIF  
SLELQDHNETCHA\*  
JHQPYYVDDPCPIHFYSKWYIRVGARKSAPLIELCVDEAGSKSPIQYIDIGNYTVSCLPFTINCQEPKLGSLVV  
SNQNGERSGARKQRRPQGLPNNTASWFTALTQHKGEDLKFRGQGVPIINTNSSPDDQIGYYRRATRF



SNIIRGWIFGTTLDSKTQSLIVNNATNVVIVKVEFQFCNDPFLGVVYHKNKSWMESEFRVYSSANNCTFEYV  
;LEAPFLYLYALVYFLQSINFVRIIMRLWLCWKCRSKNPLYDANYFLCWHTNCYDYCIPYNSVTSSIVITSGDGT

;FRLFARTRSMWSFNPETNILLNVPLHGTILTRPPESELVIGAVILRGHLRIAGHHLGRCDIKDLPKEITVATSRTL

=LIVAAIVFITLCFTLKRKTE\*

'RCSFYEDFLEYHDVRRVLDVF\*

IRGGDGKMKDLSRWYFYLLGTGPEAGLPYGANKDGIWVATEGALNTPKDHIGTRNPANNAIVLQLPQG

SQPFLMDLEGKQGNFKNLREFVFKNIDGYFKIYSKHTPINLVRDLPQGFSALEPLVDLPIGINITRFQTLALHRSY  
TSPISEHDYQIGGYTEKWESGVKDCVVLHSYFTSDYYQLYSTQLSTDTGVEHVTFIYNKIVDEPEEHVQIHTIDG:

SYYKLGASQRVAGDSGFAAYSRYRIGNYKLNTDHSSSDNIALLVQ\*

TTLPKGFYAEGSRGGSQASSRSSRSRNSSRNSTPGSSRGTS PARMAGNGGDAALALLLDRLNQLESKMSGK

'LTPGDSSSGWTAGAAAYVGYLQPRTFLLKYNENGTITDAVDCALDPLSEKCTLKSFVEKGIYQTSNFRVQP'  
SSGVVNPVMEPIYDEPTTTTSVPL\*

GQQQQQTVTKKSAEASKKPRQKRTATKAYNVTQAFGRRGPEQTQGNFGDQELIRQGTDYKHWPQIAQF,

TESIVRFPNITNLCPFGEVFNATRFASVYAWNRKRISNCVADYSVLYNSASFSTFKCYGVSPTKLNDLCFTNVYAI

APSASAFFGMSRIGMEVTPSGTWLTYTGAIKLDDKDPNFKDQVILLNKHIDAYKTFPTEPKKDKKKKADETQA

DSFVIRGDEVQRQIAPGQTGKIADYNYKLPDDFTGCVIAWNSNNLDSKVGGNYNLYRLFRKSNLKPFERDISTEI

ALPQRQKKQQTVTLLPAADLDDFSKQLQQSMSSADSTQA\*

YQAGSTPCNGVEGFNCYFPLQSYGFQPTNGVGYQPYRVVLSFELLHAPATVCGPKKSTNLVKNKCVNFNFN

3LTGTGVLTESNKKFLPFQQFGRDIADTTDAVRDPQLEILDITPCSFGGVSVITPGTNTSNQVAVLYQDVNCTE

VPVAIHADQLTPTWRVYSTGSNVFQTRAGCLIGAEHVNNSYECDIPIGAGICASYQTQTNSPRRARSVASQSII



AYTMSLGAENSVAYSNNSIAIPTNFTISVTTEILPVSMTKTSVDCTMYICGDSTECNLLLQYGSFCTQLNRALTG

IAVEQDKNTQEVFAQVKQIYKTPPIKDFGGFNFSQILPDPSKPSKRSFIEDLLFNKVTLADAGFIKQYGDCLGDIA

.ARDLICAQKFNGLTVLPPLLTDEMIAQYTSALLAGTITSGWTFGAGAALQIPFAMQMAYRFNGIGVTQNVLYE

NQKLIANQFNSAIGKIQDLSSTASALGKLQDVVNQNAQALNTLVKQLSSNFGAISSVLNDILSRDKVEAEVQI

DRITGRLQSLQTYVTQQLIRAAEIRASANL

| subgenome | peak_leader_peak_TRS_start | ACGAAC | ATG_position | known_ATG |       |
|-----------|----------------------------|--------|--------------|-----------|-------|
| 1         | 52                         | 26469  | yes          | 26523     | M     |
| 2         | 52                         | 28249  | yes          | 28274     | N     |
| 3         | 52                         | 28256  | yes          | 28274     | N     |
| 4         | 60                         | 21045  | no           | 21049     | -     |
| 5         | 65                         | 22273  | no           | 22359     | -     |
| 6         | 65                         | 22488  | no           | 22614     | -     |
| 7         | 65                         | 24777  | no           | 24810     | -     |
| 8         | 65                         | 27479  | no           | 27756     | ORF7b |
| 9         | 69                         | 21053  | no           | 21071     | -     |
| 10        | 69                         | 26292  | yes          | 26523     | M     |
| 11        | 69                         | 28284  | no           | 28284     | -     |
| 12        | 69                         | 29112  | no           | 29222     | -     |
| 13        | 69                         | 29152  | no           | 29222     | -     |

| 20_leader_seq         | TRS_seq            | first_orf_aa                                 |
|-----------------------|--------------------|----------------------------------------------|
| CAACCAACTTTTCGATCTCTT | CTAAACGAACTAAATA   | MADSNGTITVEELKKLLEQWNLVIGFLFTWICLLQFAYAN     |
| CAACCAACTTTTCGATCTCTT | ATTTTCATCTAAACGAA  | MSDNGPQNQRNAPRITFGGSPDSTGNSQNGERSGARSK       |
| CAACCAACTTTTCGATCTCTT | CTAAACGAACAAACTA   | MSDNGPQNQRNAPRITFGGSPDSTGNSQNGERSGARSK       |
| TTTCGATCTCTTGATAGATCT | TGAT               | MYDPKTKNVTKENDSKEGFFTYICGFIQQKLALGGSVAIKI    |
| ATCTCTTGATAGATCTGTTCT | GTTTCAAACCTTTACTTC | MWVIFNLGLFY*                                 |
| ATCTCTTGATAGATCTGTTCT | AAAAAGGAATCTATCA   | MLGTGRESATVLLIILSYIIPHHFLLSVMECLLN*          |
| ATCTCTTGATAGATCTGTTCT | AAAAGAACCTTCACAAC  | MMEKHTFLVKVSLFQMAHTGL*                       |
| ATCTCTTGATAGATCTGTTCT | TACTTTTAAAAGAACC   | MIELSLIDFYLCFLAFLFLVLIIMLIIFWFSLELQDHNETCHA* |
| CTTGATAGATCTGTTCTCTAA | ACGACCCTAAGACTAA   | MLQKKMTLKRVSFTFVGLYNKS*                      |
| CTTGATAGATCTGTTCTCTAA | CGTACTTCTTTTTCTTG  | MADSNGTITVEELKKLLEQWNLVIGFLFTWICLLQFAYAN     |
| CTTGATAGATCTGTTCTCTAA | -                  | MDPKISEMHPALRLVDPQIQLAVTRMENAVGRDQNNVG       |
| CTTGATAGATCTGTTCTCTAA | AACAAACCCAAGGAA    | MSRIGMEVTPSGTWLTYTGAIKLDKDPNFKDQVILLNKH      |
| CTTGATAGATCTGTTCTCTAA | ACAAGGAACTGATTAC   | MSRIGMEVTPSGTWLTYTGAIKLDKDPNFKDQVILLNKH      |

IRNRFLYIIKLIFLWLLWPVTLACFVLAAYRINWITGGIAIAMAACLVGLMWLSYFIASFRLFARTRSMWSFNPE  
QRRPQGLPNNTASWFTALTQHGKEDLKFPRGQGVPIINTNSSPDDQIGYYRRATRRIRGGDGKMKDLSRW'  
QRRPQGLPNNTASWFTALTQHGKEDLKFPRGQGVPIINTNSSPDDQIGYYRRATRRIRGGDGKMKDLSRW'  
TEHSWNADLYKLMGHFAWWTAFVTNVNASSSEAFLIGCNYLGKPREQIDGYVMHANYIFWRNTNPIQLSSY

€

IRNRFLYIIKLIFLWLLWPVTLACFVLAAYRINWITGGIAIAMAACLVGLMWLSYFIASFRLFARTRSMWSFNPE  
;PKVYPIILRLGSPLSLNMARKTLNSLEDKAFQLTPIAVQMTKLATTEELPDEFVVVTVK\*  
IIDAYKTFPPTPEPKDKKKKKADETQALPQRQKKQQTVTLLPAADLDDFSKQLQQSMSSADSTQA\*  
IIDAYKTFPPTPEPKDKKKKKADETQALPQRQKKQQTVTLLPAADLDDFSKQLQQSMSSADSTQA\*



TNILLNVPLHGTILTRP LLESELVIGAVILRGHLRIAGHHLGRCDIKDLPKEITVATSRTLSYYKLGASQRVAGDSG  
YFYYLGTGPEAGLPYGANKDGIWVATEGALNTPKDHIGTRNPANNAIVLQLPQGTTLPKGFYAEGSRGGSC  
YFYYLGTGPEAGLPYGANKDGIWVATEGALNTPKDHIGTRNPANNAIVLQLPQGTTLPKGFYAEGSRGGSC  
'SLFDMSKFPLKLRGTAVMSLKEGQINDMILSLLSKGR LIIRENNRVVISSDVLVNN\*

TNILLNVPLHGTILTRP LLESELVIGAVILRGHLRIAGHHLGRCDIKDLPKEITVATSRTLSYYKLGASQRVAGDSG

FAAYSRYRIGNYKLNTDHSSSDNIALLVQ\*  
QASSRSSRSRNSSRNSTPGSSRGTSPARMAGNGGDAALALLLDRLNQLESKMSGKGQQQGQTVTKKSA.  
QASSRSSRSRNSSRNSTPGSSRGTSPARMAGNGGDAALALLLDRLNQLESKMSGKGQQQGQTVTKKSA.

FAAYSRYRIGNYKLNTDHSSSDNIALLVQ\*

AEASKKPRQKRTATKAYNVTQAFGRRGPEQTQGNFGDQELIRQGTDYKHWPQIAQFAPSASAFFGMSRIGN  
AEASKKPRQKRTATKAYNVTQAFGRRGPEQTQGNFGDQELIRQGTDYKHWPQIAQFAPSASAFFGMSRIGN

MEVTPSGTWLTYTGAIKLDDKDPNFKDQVILLNKHIDAYKTFPPTPEPKDKKKKKADETQALPQRQKKQQTIVL  
MEVTPSGTWLTYTGAIKLDDKDPNFKDQVILLNKHIDAYKTFPPTPEPKDKKKKKADETQALPQRQKKQQTIVL

.LPAADLDDFSKQLQQSMSSADSTQA\*  
.LPAADLDDFSKQLQQSMSSADSTQA\*

| subgenome | peak_leader | peak_TRS_start | ACGAAC | ATG_position | 20_leader_seq    |
|-----------|-------------|----------------|--------|--------------|------------------|
| S         | 65          | 21552          | yes    | 21563        | ATCTCTTAGATCTGTT |
| ORF3a     | 69          | 25385          | yes    | 25393        | CTTAGATCTGTTCTCT |
| E         | 69          | 26237          | yes    | 26245        | CTTAGATCTGTTCTCT |
| M         | 64          | 26468          | yes    | 26523        | GATCTTAGATCTGT   |
| ORF6      | 69          | 27041          | yes    | 27202        | CTTAGATCTGTTCTCT |
| ORF7a     | 69          | 27388          | yes    | 27394        | CTTAGATCTGTTCTCT |
| ORF7b     | 69          | 27674          | no     | 27756        | CTTAGATCTGTTCTCT |
| ORF8      | 65          | 27884          | yes    | 27894        | ATCTCTTAGATCTGTT |
| N         | 64          | 28255          | yes    | 28274        | GATCTTAGATCTGT   |

| TRS_seq                  | first_orf_aa                                               |
|--------------------------|------------------------------------------------------------|
| CTAAACGAACA              | MFVFLVLLPLVSSQCVNLTRTQLPPAYTNSFTRGVVYYPDKVFRSSVLHSTQDLFL   |
| ACGAACTT                 | MDLFMRIFTIGTVTLKQGEIKDATPSDFVRATATIPIQASLPFGWLIVGVALLAVF   |
| ACGAACTT                 | MYSFVSEETGTLIVNSVLLFLAFVVFLLVTLAILTALRLCAYCCNIVNVSLVKPSFYV |
| TCTAAACGAACTAAATATTATATT | MADSNGTITVEELKKLLEQWNLVIGFLFTWICLLQFAYANRNRFLYIIKLIFLWLL   |
| ACGAACGCTTTCTTATTACAAATT | MFHLVDFQVTIAEILLIMRTFKVSIWNLDYIINLIKNLSKSLTENKYSQLDEEQPM   |
| ACGAAC                   | MKIILFLALITLATCELYHYQECVRGTTVLLKEPCSSGTYESGNSPFHPLADNKFALT |
| AAGAACTTTACTCTCCAATTTTCT | MIELSLIDFYLCFLAFLLFLVLIIMLIIFWFSLELQDHNETCHA*              |
| CTAAACGAAC               | MKFLVFLGIITTVAAFHQECSLQSQCTQHQPYYVDDPCPIHFYSKWYIRVGARKSA   |
| TCTAAACGAACAAACTAAA      | MSDNGPQNQRNAPRITFGGSPDSTGSNQNNGERSGARSKQRRPQGLPNNTASV      |

.PFFSNVTWFHAIHVSGTNGTKRFDNPVLPFNDGVYFASTEKSNIIRGWIFGTTLDSKTQSLIVNNATNVVIKV  
QSASKIITLKKRWQLALSKGVHFVCNLLLLFVTVYSHLLLVAAGLEAPFLYLYALVYFLQSINFVRIIMRLWLCWK  
YSRVKNLNSSRVPDLLV\*

WPVTLACFVLAAYRINWITGGIAIAMACLVGLMWLSYFIASFRLFARTRSMWSFNPETNILLNVPLHGTILTF  
IEID\*

CFSTQFAFACPDGVKHVYQLRARSVSPKLFIRQEEVQELYSPIFLIVAAIVFITLCFTLKRKTE\*

PLIELCVDEAGSKSPIQYIDIGNYTVSCLPFTINCQEPKLGSLVVRCSEDFLEYHDVRVVLDFI\*

MFTALTQHGKEDLKFPRGQGVPIINTNSSPDDQIGYYRRATRRIRGGDGKMKDLSRWYFYLLGTGPEAGLPY



/CEFQFCNDPFLGVYYHKNNKSWMESEFRVYSSANNCTFEYVSQPFLMDLEGKQGNFKNLREFVFKNIDGYF  
CRSKNPLLYDANYFLCWHTNCYDYCIPYNSVTSSIVITSGDGTTSPISEHDYQIGGYTEKWESGVKDCVVLHSYI

ŔPPESELVIGAVILRGHLRIAGHHLGRCDIKDLPKEITVATSRTLSYYKLGASQRVAGDSGFAAYSRYRIGNYKLN

GANKDGIWVATEGALNTPKDHIGTRNPANNAIIVLQLPQGTTLPKGFYAEGSRGGSQASSRSSRSRNSSRI

KIYSKHTPINLVRDLPQGFSALEPLVDLPIGINITRFQTLALHRSYLTPGDSSSGWTAGAAAYYVGYLQPRTFLL  
FTSDYYQLYSTQLSTDTGVEHVTFYIYNKIVDEPEEHVQIHTIDGSSGVVNPVMEPIYDEPTTTTSVPL\*

ITDHSSSDNIALLVQ\*

NSTPGSSRGTSARMAGNGGDAALALLLDRLNQLESKMSGKGQQQGGQTVTKKSAAEASKKPRQRTATI

.KYNENGTITDAVDCALDPLSETKCTLKSFTVEKGIYQTSNFRVQPTESIVRFPNITNLCPFGEVFNATRFASVYA'

<AYNVTQAFGRRGPEQTQGNFGDQELIRQGTDYKHWPQIAQFAPSASAFFGMSRIGMEVTPSGTWLTYTG.

WNRKRISNCVADYSVLYNSASFSTFKCYGVSPTKLNDLCFTNVYADSFVIRGDEVQRQIAPGQTGKIADYNYKLP

AIKLDDKDPNFKDQVILLNKHIDAYKTFPPTEPKDKKKKADETQALPQRQKKQQTVTLLPAADLDDFSKQLQ

'DDFTGCVIAWNSNNLDSKVGGNYNYLYRLFRKSNLKPFERDISTEIYQAGSTPCNGVEGFNCYFPLQSYGFQF

.QSMSSADSTQA\*

PTNGVGYQPYRVVLSFELLHAPATVCGPKKSTNLVKNKCVNFNFNGLTGTGVLTESNKKFLPFQQFGRDIAD

TTDAVRDPQLEILDITPCFSGGVSVITPGTNTSNQVAVLYQDVNCTEVPVAIHADQLTPTWRVYSTGSNVFC

QTRAGCLIGAEHVNNSYECDIPIGAGICASYQTQTNSPRRARSVASQSIIAYTMSLGAENSVAYSNNSIAIPTNF1



FI SVTTEILPVSMTKTSVDCTMYICGDSTECSNLLLQYGSFCTQLNRALTGIAVEQDKNTQE VFAQVKQIYKTPP

IKDFGGFNFSQILPDPSKPSKRSFIEDLLFNKVTLADAGFIKQYGDCLGDIAARDLCAQKFNGLTVLPPLLDEN

MIAQYTSALLAGTITSGWTFGAGAALQIPFAMQMAYRFNGIGVTQNVLYENQKLIANQFNSAIGKIQDLSST/

ASALGKLQDVVNQNAQALNTLVKQLSSNFGAISSVLNDILSRDKVEAEVQIDRLITGRQLQSLQTYVTQQLIRA/

AEIRASANL

| subgenome | peak_leader_peak_TRS_start | ACGAAC | ATG_position | known_ATG |   |
|-----------|----------------------------|--------|--------------|-----------|---|
| 1         | 67                         | 25800  | no           | 25814     | - |
| 2         | 68                         | 2689   | no           | 2745      | - |
| 3         | 68                         | 4580   | no           | 4590      | - |
| 4         | 68                         | 5789   | no           | 5859      | - |
| 5         | 68                         | 15777  | no           | 15812     | - |
| 6         | 68                         | 18051  | no           | 18153     | - |
| 7         | 48                         | 26443  | yes          | 26523     | M |
| 8         | 68                         | 21926  | no           | 21936     | - |
| 9         | 68                         | 23020  | no           | 23046     | - |
| 10        | 68                         | 23365  | no           | 23403     | - |
| 11        | 48                         | 28184  | no           | 28207     | - |
| 12        | 68                         | 26290  | yes          | 26523     | M |
| 13        | 69                         | 3816   | no           | 3842      | - |
| 14        | 69                         | 9713   | no           | 9768      | - |
| 15        | 69                         | 10640  | no           | 10662     | - |
| 16        | 69                         | 13619  | no           | 13625     | - |
| 17        | 69                         | 18554  | no           | 18594     | - |
| 18        | 49                         | 28266  | no           | 28274     | N |
| 19        | 69                         | 22559  | no           | 22614     | - |
| 20        | 69                         | 25164  | no           | 25179     | - |
| 21        | 70                         | 2794   | no           | 2802      | - |
| 22        | 70                         | 11779  | no           | 11849     | - |
| 23        | 70                         | 22231  | no           | 22359     | - |
| 24        | 70                         | 22277  | no           | 22359     | - |
| 25        | 70                         | 22502  | no           | 22614     | - |
| 26        | 70                         | 22945  | no           | 23004     | - |
| 27        | 70                         | 27761  | no           | 27825     | - |
| 28        | 71                         | 4592   | no           | 4607      | - |
| 29        | 71                         | 5594   | no           | 5681      | - |
| 30        | 71                         | 5708   | no           | 5718      | - |
| 31        | 71                         | 18943  | no           | 18956     | - |
| 32        | 71                         | 22727  | no           | 22743     | - |
| 33        | 71                         | 25069  | no           | 25080     | - |
| 34        | 71                         | 26401  | yes          | 26523     | M |
| 35        | 71                         | 27762  | no           | 27825     | - |
| 36        | 71                         | 28286  | no           | 28305     | - |
| 37        | 72                         | 4019   | no           | 4044      | - |
| 38        | 72                         | 15808  | no           | 15812     | - |
| 39        | 73                         | 11839  | no           | 11849     | - |
| 40        | 73                         | 22285  | no           | 22359     | - |
| 41        | 73                         | 23028  | no           | 23046     | - |
| 42        | 73                         | 25856  | no           | 25910     | - |

|    |    |       |     |       |   |
|----|----|-------|-----|-------|---|
| 43 | 74 | 4321  | no  | 4350  | - |
| 44 | 74 | 10132 | no  | 10152 | - |
| 45 | 74 | 12974 | no  | 12986 | - |
| 46 | 74 | 13555 | no  | 13556 | - |
| 47 | 74 | 21058 | no  | 21071 | - |
| 48 | 74 | 25858 | no  | 25910 | - |
| 49 | 75 | 21566 | no  | 21744 | - |
| 50 | 75 | 21572 | no  | 21744 | - |
| 51 | 75 | 21574 | no  | 21744 | - |
| 52 | 75 | 21575 | no  | 21744 | - |
| 53 | 75 | 21718 | no  | 21744 | - |
| 54 | 75 | 25135 | no  | 25143 | - |
| 55 | 75 | 26483 | no  | 26523 | M |
| 56 | 75 | 26486 | no  | 26523 | M |
| 57 | 75 | 26490 | no  | 26523 | M |
| 58 | 75 | 26491 | no  | 26523 | M |
| 59 | 75 | 26494 | no  | 26523 | M |
| 60 | 76 | 28267 | no  | 28274 | N |
| 61 | 77 | 25396 | no  | 25405 | - |
| 62 | 77 | 26481 | no  | 26523 | M |
| 63 | 78 | 21570 | no  | 21744 | - |
| 64 | 78 | 21576 | no  | 21744 | - |
| 65 | 55 | 26461 | yes | 26523 | M |
| 66 | 58 | 23922 | no  | 24051 | - |
| 67 | 60 | 4007  | no  | 4044  | - |
| 68 | 46 | 26422 | yes | 26523 | M |
| 69 | 63 | 698   | no  | 726   | - |
| 70 | 47 | 17898 | no  | 17906 | - |
| 71 | 63 | 5785  | no  | 5859  | - |
| 72 | 63 | 6243  | no  | 6243  | - |
| 73 | 63 | 23142 | no  | 23173 | - |
| 74 | 63 | 25001 | no  | 25050 | - |
| 75 | 63 | 25672 | no  | 25718 | - |
| 76 | 47 | 26421 | yes | 26523 | M |
| 77 | 64 | 25795 | no  | 25814 | - |
| 78 | 65 | 7595  | no  | 7665  | - |
| 79 | 65 | 8113  | no  | 8133  | - |
| 80 | 65 | 10020 | no  | 10070 | - |
| 81 | 65 | 11200 | no  | 11219 | - |
| 82 | 65 | 11664 | no  | 11697 | - |
| 83 | 66 | 22502 | no  | 22614 | - |
| 84 | 67 | 3362  | no  | 3375  | - |
| 85 | 67 | 4018  | no  | 4044  | - |

86

67

21083

no

21086

-



20\_leader\_seq

CTCTTG TAGATCTGTTCTCT  
TCTTG TAGATCTGTTCTCTA  
TCTTG TAGATCTGTTCTCTA  
TCTTG TAGATCTGTTCTCTA  
TCTTG TAGATCTGTTCTCTA  
TCTTG TAGATCTGTTCTCTA  
AAACCAACCAACTTTTCGATC  
TCTTG TAGATCTGTTCTCTA  
TCTTG TAGATCTGTTCTCTA  
TCTTG TAGATCTGTTCTCTA  
AAACCAACCAACTTTTCGATC  
TCTTG TAGATCTGTTCTCTA  
TCTTG TAGATCTGTTCTCTA  
CTTG TAGATCTGTTCTCTAA  
CTTG TAGATCTGTTCTCTAA  
CTTG TAGATCTGTTCTCTAA  
CTTG TAGATCTGTTCTCTAA  
CTTG TAGATCTGTTCTCTAA  
AACCAACCAACTTTTCGATCT  
CTTG TAGATCTGTTCTCTAA  
CTTG TAGATCTGTTCTCTAA  
TTG TAGATCTGTTCTCTAAA  
TTG TAGATCTGTTCTCTAAA  
TTG TAGATCTGTTCTCTAAA  
TTG TAGATCTGTTCTCTAAA  
TTG TAGATCTGTTCTCTAAA  
TTG TAGATCTGTTCTCTAAA  
TG TAGATCTGTTCTCTAAAC  
GTAGATCTGTTCTCTAAACG  
GTAGATCTGTTCTCTAAACG  
TAGATCTGTTCTCTAAACGA  
TAGATCTGTTCTCTAAACGA  
TAGATCTGTTCTCTAAACGA  
TAGATCTGTTCTCTAAACGA

TRS\_seq

AAACCCATTACTTT  
AACAAACAATACCTTCACACTCAAAGGCGGT  
AACGATCTAA  
AAAGAACTTTGTATTGCATAGACGGTGCTT  
AAAGAACTTTAAGTCAGTTCTTTATTATCAA  
AACAGGACTCTTTAAAGATTGTAGTAAGGTA  
TCTTCTAGAGTTCCTGATCTTCTGGTCTAAAC  
AACGCTACTA  
TAATTGTTACTTTTCCTTTACAATCAT  
AACAAATACTTCTAACCAGGTGCTGTTCTTT  
TCTTG TAGTGCGTTGTTTCGTTCT  
AGCGTACTTCTTTTTCTTGCTTTCGTGGTATT  
ACAACTTGTTTCAAGCTTTTTGGAA  
ACAAAGCATTCTATTGGTTCTTTAGTAATTA  
ACGGACACA ACTATTACAGTTA  
ACGAAG  
ACACACTTAAAAATCTCTCTGACAGAGTCGT  
AAACTAAA  
ACAACTTG TGCCCTTTTGGTGAAGTTTTTAA  
AAGAACTTGGAAGT  
TGAACCTG  
CAAACCTAACATTAAATTGTTGGGTGTTGGT  
AGAACCATTGGTAGATTTGCCAATAGGTATT  
CAAACCTTACTTGCTTTACATAGAAGTTATTT  
CAAACCTTAACTTTAGAGTCCAACCAACAG  
CAAACCTTTTGAGAGAGATATTTCAACTGAA  
TGAACCTTCATTAATTGACTTCTATTTGTGCT  
GAAACTCTTGTTACA  
GAACAATTTAAGAAAGGTGTTTCAGATACCTT  
GAACTTAAGC  
GAACTGAAGATTA  
GATCTCTGCTTTACTA  
CTCTGGCATT  
AAACCTTCTTTTTACGTTTACTCTCGTGTTAA  
GAACTTTCATTAATTGACTTCTATTTGTGCTT  
GGACCCCAAATCAGCGAA  
AACTTGTTACTTTATATTGACATTA  
AACA  
ACAGTCTAAA  
ACTTGCTTTACATAGAAGTTATTTGACTCCTG  
ACTTTCCTTTACAATCAT  
ACTATTGTATACCTTACAATAGTGTAACCTCT

AGATCTGTTCTCTAAACGAA  
AGATCTGTTCTCTAAACGAA  
AGATCTGTTCTCTAAACGAA  
AGATCTGTTCTCTAAACGAA  
AGATCTGTTCTCTAAACGAA  
GATCTGTTCTCTAAACGAAC  
GATCTGTTCTCTAAACGAAC  
GATCTGTTCTCTAAACGAAC  
GATCTGTTCTCTAAACGAAC  
GATCTGTTCTCTAAACGAAC  
GATCTGTTCTCTAAACGAAC  
GATCTGTTCTCTAAACGAAC  
GATCTGTTCTCTAAACGAAC  
GATCTGTTCTCTAAACGAAC  
ATCTGTTCTCTAAACGAAC  
TCTGTTCTCTAAACGAAC  
TCTGTTCTCTAAACGAAC  
CTGTTCTCTAAACGAAC  
CTGTTCTCTAAACGAAC  
CTGTTCTCTAAACGAAC  
CCAACCTTCGATCTCTTGTA  
ACTTTTCGATCTCTTGATAGAT  
TTTCGATCTCTTGATAGATCT  
ACAAACCAACCAACTTTCGAT  
CGATCTCTTGATAGATCTGTT  
CAAACCAACCAACTTTCGAT  
CGATCTCTTGATAGATCTGTT  
CGATCTCTTGATAGATCTGTT  
CGATCTCTTGATAGATCTGTT  
CGATCTCTTGATAGATCTGTT  
CAAACCAACCAACTTTCGAT  
GATCTCTTGATAGATCTGTT  
ATCTCTTGATAGATCTGTT  
ATCTCTTGATAGATCTGTT  
ATCTCTTGATAGATCTGTT  
ATCTCTTGATAGATCTGTT  
ATCTCTTGATAGATCTGTT  
TCTCTTGATAGATCTGTT  
CTCTTGATAGATCTGTT  
CTCTTGATAGATCTGTT

CTTTACATTCTACCATCTATTATCTCTA  
ACTTAACGGTCTTTGGCTTG  
CTAAATAGAGGT  
A  
CCTAAGACTAAAA  
TATTGTATACCTTACAATAGTGTAACCTTCTTC/  
TTTGTCTTTTCTTGTTTTATTGCCACTAGTCTCT,  
TTTCTTGTTTTATTGCCACTAGTCTCTAGTCAG  
TCTTGTTTTATTGCCACTAGTCTCTAGTCAGT  
CTTGTTTTATTGCCACTAGTCTCTAGTCAGTG  
GGACTTGTTCTTACCTTTCTTTTCCA  
GAATTTAA  
TATTATATTAGTTTTTCTGTTTGGAACCTTTAAT  
TATATTAGTTTTTCTGTTTGGAACCTTTAATTTT  
TTAGTTTTTCTGTTTGGAACCTTTAATTTTAGCC  
TAGTTTTTCTGTTTGGAACCTTTAATTTTAGCC  
TTTTTCTGTTTGGAACCTTTAATTTTAGCC  
AACTAAA  
GATTTGTTT  
AATATTATATTAGTTTTTCTGTTTGGAACCTTT/  
TTTTTCTTGTTTTATTGCCACTAGTCTCTAGTC  
TTGTTTTATTGCCACTAGTCTCTAGTCAGTGT  
CTTCTGGTCTAAACGAACCTAAATATTATATTA  
AAATTTACAAAACACCACCAATTAAGATTTT  
TTCCTCACAGAAAACCTGTTACTTTATATTGA/  
TCTCGTGTTAAAAATCTGAATTCTTCTAGAGT  
TTAGGCGACGAGCTTGCCACTGATCCTT  
CTCTTGTA  
TTCTAAAGAACTTTGTATTGCATAGACGGT/  
-  
CTAAAAAGTCTACTAATTTGGTTAAAAACAA  
TCATTCAAGGAGGAGTTAGATAAATATTTTA/  
CTTTTGCTCGTTGCTGCTGGCCTTGAAGCCCC  
CTCTCGTGTTAAAAATCTGAATTCTTCTAGAG  
TCCAAAAACCCATTACTTT  
TTTTGCAAACCTACACAATTGGAATTGTGTTAA/  
AGAAGCTGAACTTGCAAAGA  
CACCACAAACCTCTATCACCTCAGCTGTTTTG  
CACTGTAGCTTATTTTAAT  
TCAACCGCTACTTTAGACTGACTCTTGGTGTT  
CAAACCTTAACTTTAGAGTCCAACCAACAG/  
AACTTACTGACA  
AACTTGTTACTTTATATTGACATTA

CTCTTGTAGATCTGTTCTCT      AAA

first\_orf\_aa

MMPTIFFAGILIVTTIVYLTIV\*

MTL\*

MKLLLQCHLAM\*

MFSTKKTVTQQP\*

MFLCLKQNVGLRLTLKDLNMFALNIQC\*

MC\*

MADSNGTITVEELKKLLEQWNLVIGFLFTWICLLQFAYANRNRFYIIKLIFLWLLWPVTLACFVLAAYRINWITGGIAI  
MLLLKSVNFMVMIHFVVFITTKTKVGVKVSSEFILVRIIALLNMSLSLFLWTLKENRVISKILGNLCLRILMVILKYILSTF  
MVSNPLMVLVTNHTE\*

MLTAQKSLLLFMQINLLLLGVFILQVLMFFKHVQAV\*

MKTF\*

MADSNGTITVEELKKLLEQWNLVIGFLFTWICLLQFAYANRNRFYIIKLIFLWLLWPVTLACFVLAAYRINWITGGIAI  
MKSEKQVEQKIAEIPKEEVKPFITESKPSVEQRKQDDKIKACVEEVTTTTLEETKFLTENLLYIDINGNLHPDSATLVSDIC  
MVFPLVLLKKLRAPFC\*

MF\*

MTI\*

MGTWL\*

MSDNGPQNQRNAPRITFGGSPDSTGSNQNNGERSGARSKQRRPQGLPNNTASWFTALTQHGKEDLKFRGQGVPI  
MLGTGRESATVLLIILSYIIPHHFPLLSVMECLLN\*

MSSI\*

MKGLIKYLMRSALPIQLNSVQK\*

MSDVKCTSVLLSVLQQLRVESSEKSLWAQCVQLHNDILLAKDTTEAFEKMSVLLSVLLSMQGAVDINKLCEEMLDNRA  
MWVIFNLGLFY\*

MWVIFNLGLFY\*

MLGTGRESATVLLIILSYIIPHHFPLLSVMECLLN\*

MVLKVLIVTFLYNHMVSNPLMVLVTNHTE\*

MLIIFWFSLELQDHNETCHA\*

MPLGYVTHGLNLEEAARYMRSLKVPATVSVSPDAVTAYNGYLTSSSKTPEEHFIETISLAGSYKDWSYSGQSTQLGIEF  
MMSAPPAQYELKHGTFTCASEYTGNYQCGHYKHITSKETLYCIDGALLTKSSEYKGPITDVFKENSYTTTIKPVYKLDG  
MVHLLVLVSTLVITSVVTINI\*

MRLVERFNTWLLKLHY\*

MSMQIHL\*

MLQL\*

MADSNGTITVEELKKLLEQWNLVIGFLFTWICLLQFAYANRNRFYIIKLIFLWLLWPVTLACFVLAAYRINWITGGIAI  
MLIIFWFSLELQDHNETCHA\*

MHPALRLVDPQIQLAVTRMENA VGRDQNNVGPVYPIILRLGSPLSLNMARKTLNSLEDKAFQLTPIAVQMTKLATTE  
MAIFIQILPLLVTLSLS\*

MFLCLKQNVGLRLTLKDLNMFALNIQC\*

MSDVKCTSVLLSVLQQLRVESSEKSLWAQCVQLHNDILLAKDTTEAFEKMSVLLSVLLSMQGAVDINKLCEEMLDNRA  
MWVIFNLGLFY\*

MVSNPLMVLVTNHTE\*

MAQQVLFNMTTRLVVILKNGNLE\*

MRSKKFLEFLGICEKCLHMQKKHAN\*  
MT\*  
MVLGSLAATVRLQAGNATEVPANSTVLSFCAFAVDAAKAYKDYLASGGQPITNCVKMLCTHTGTGQAITVTPEANMI  
MIK\*  
MLQKKMTLKRVSFTFVGLYNKS\*  
MAQQVLFNMTTRLVILKNGNLE\*  
MLLGSMLYMSLGPMVLRGLITLSYHLMMVFILLPLRSLT\*  
MLLGSMLYMSLGPMVLRGLITLSYHLMMVFILLPLRSLT\*  
MLLGSMLYMSLGPMVLRGLITLSYHLMMVFILLPLRSLT\*  
MLLGSMLYMSLGPMVLRGLITLSYHLMMVFILLPLRSLT\*  
MLLGSMLYMSLGPMVLRGLITLSYHLMMVFILLPLRSLT\*  
MNLSSISKNLESMSSI\*  
MADSNGTITVEELKKLLEQWNLVIGFLFTWICLLQFAYANRNRFYIIKLIFLWLLWPVTLACFVLAAYRINWITGGIAI  
MADSNGTITVEELKKLLEQWNLVIGFLFTWICLLQFAYANRNRFYIIKLIFLWLLWPVTLACFVLAAYRINWITGGIAI  
MADSNGTITVEELKKLLEQWNLVIGFLFTWICLLQFAYANRNRFYIIKLIFLWLLWPVTLACFVLAAYRINWITGGIAI  
MADSNGTITVEELKKLLEQWNLVIGFLFTWICLLQFAYANRNRFYIIKLIFLWLLWPVTLACFVLAAYRINWITGGIAI  
MADSNGTITVEELKKLLEQWNLVIGFLFTWICLLQFAYANRNRFYIIKLIFLWLLWPVTLACFVLAAYRINWITGGIAI  
MSDNQPQNQRNAPRITFGGSPDSTGSNQNNGERSGARSKQRRPQGLPNNTASWFTALTQH GKEDLKFRGQGVPI  
MRIFTIGTVTLKQGEIKDATPSDFVRATAPIQASLPFGWLIVGVALLAVFQSASKIITLKKRWQLALSKGVHFVCNLLLL  
MADSNGTITVEELKKLLEQWNLVIGFLFTWICLLQFAYANRNRFYIIKLIFLWLLWPVTLACFVLAAYRINWITGGIAI  
MLLGSMLYMSLGPMVLRGLITLSYHLMMVFILLPLRSLT\*  
MLLGSMLYMSLGPMVLRGLITLSYHLMMVFILLPLRSLT\*  
MADSNGTITVEELKKLLEQWNLVIGFLFTWICLLQFAYANRNRFYIIKLIFLWLLWPVTLACFVLAAYRINWITGGIAI  
MLASSNMVIALVILLETFSVHKSALTALLFCHLCSQMK\*  
MAIFIQILPLLVTLSLS\*  
MADSNGTITVEELKKLLEQWNLVIGFLFTWICLLQFAYANRNRFYIIKLIFLWLLWPVTLACFVLAAYRINWITGGIAI  
MKIFKKTGLNIAVVLVNSCVSLTEGHTLAMSIITTSVALMATLLSALKTF\*  
M\*  
MFSTKKTVTQQP\*  
MLTMQLIKPRINQIPGVYVVFQAQNLKHQIRLMY\*  
MCQFQLQWFNRHRCYS\*  
MLI\*  
ML\*  
MADSNGTITVEELKKLLEQWNLVIGFLFTWICLLQFAYANRNRFYIIKLIFLWLLWPVTLACFVLAAYRINWITGGIAI  
MMPTIFFAGILIVTTIVYLTIV\*  
MKLRETSYSLKQD\*  
MCP\*  
MAFPSGKVEGCMVQVTCGTTTLNGLWLDVVCPRHVICTSEDMLNPNYEDLLIRKSNHNFVQAGNVQLRVIGHSI  
MVYMPASWVMRIMTWLDMVDTSLSGFKLDCV MYASAVLLILMTARTVYDDGARRVWTLMNVLTLVYKVVYGN  
MIT\*  
MLGTGRESATVLLIILSYIIPHHFPLLSVMECLLN\*  
MYTLKMQTLWKKLKR\*  
MAIFIQILPLLVTLSLS\*

MTLKRVFSLTFVGLYNKS\*

IAMACLVGLMWLSYFIASFRLFARTRSMWSFNPETNILLNVPLHGTILTRP LLESELVIGAVILRGHLRIAGHHL  
RLLI\*

IAMACLVGLMWLSYFIASFRLFARTRSMWSFNPETNILLNVPLHGTILTRP LLESELVIGAVILRGHLRIAGHHL  
DITFLKKDAPYIVGDVVQEGVLTAVVIPTKKAGGTTEMLAKALRKVPTDNYITTPGQGLNGYTVEEAKTVLKK

ITNSSPDDQIGYYRRATRRIRGGDGKMKDLSRWFYFYLLGTGPEAGLPYGANKDGIWVATEGALNTPKDHIC

ATLQAIASEFSSLPSYAAFATAQEAYEQAVANGDSEVVLKLLKSLNVAKSEFDRDAAMQRKLEKMADQAMT

LKRGDKSVYYTSNPTTFHLDGEVITFDNLKTLSSLREVRTIKVFTTVDNINLHTQVVDMSMTYGQQFGPTYLD  
;VVCTEIDPKLDNYYKKDNSYFTEQPIDLVPNQYPNASFDNFKFVCDNIKFADDLNQLTGYKKPASRELKVTF

IAMACLVGLMWLSYFIASFRLFARTRSMWSFNPETNILLNVPLHGTILTRP LLESELVIGAVILRGHLRIAGHHL

ELPDEFVVVTVK\*

ATLQAIASEFSSLPSYAAFATAQEAYEQAVANGDSEVVLKLLKSLNVAKSEFDRDAAMQRKLEKMADQAMT

DQESFGGASCCLYCRCHIDHPNPKGFCDLKGKYVQIPTTCANDPVGFTLKNVCTVCGMWKGYGCSCDQLRI

IAMACLVGLMWLSYFIASFRLFARTRSMWSFNPETNILLNVPLHGTILTRP LLESELVIGAVILRGHLRIAGHHL C  
ITNSSPDDQIGYYRRATRRIRGGDGKMKDLSRWFYFYLGTP EAGLPYGANKDGIWVATEGALNTPKDHIC  
FVTVYSHLLLVAAGLEAPFLYLYALVYFLQSINFVRIIMRLWLCWKCRSKNPLLYDANYFLCWHTNCYDYCIPYI  
IAMACLVGLMWLSYFIASFRLFARTRSMWSFNPETNILLNVPLHGTILTRP LLESELVIGAVILRGHLRIAGHHL C

IAMACLVGLMWLSYFIASFRLFARTRSMWSFNPETNILLNVPLHGTILTRP LLESELVIGAVILRGHLRIAGHHL C

IAMACLVGLMWLSYFIASFRLFARTRSMWSFNPETNILLNVPLHGTILTRP LLESELVIGAVILRGHLRIAGHHL C

IAMACLVGLMWLSYFIASFRLFARTRSMWSFNPETNILLNVPLHGTILTRP LLESELVIGAVILRGHLRIAGHHL C

MQNCVLKLVDTANPKTPKYKFVRIQPGQTF SVLACYNGSPSGVYQCAMRPNFTIKGSFLNGSCGSVGFNID  
JALDQAISMWALIISVTSNYSGVVTTVMFLARGIVFMCVEYCFIFITGNTLQ C IMLVYCFGLGYFCTCYGFLFCLL





3RCDIKDLPKEITVATSRTLSTYKLGASQRVAGDSGFAAYSRYRIGNYKLNTDHSSSSDNIALLVQ\*

3RCDIKDLPKEITVATSRTLSTYKLGASQRVAGDSGFAAYSRYRIGNYKLNTDHSSSSDNIALLVQ\*  
CKSAFYILPSIISNEKQEILGTVSWNLREMLAHAEETRKLMPVCVETKAIVSTIQRKYKGIKIQEGVVDYGARFYF

3TRNPANNAIIVLQLPQGTTLPKGFYAEGSRGGSQASSRSSSRNSSRNSTPGSSRGTS Parm MAGNGDAA

QMYKQARSEDKRAKVTSAMQTMFTMLRKLNDALNNIINNARDGCVPLNIPLTTAAKLMVVIPDYNTYK

3ADVTKIKPHNSHEGKTFYVLPNDDTLRVEAFEYYHTTDP SFLGRYMSALNHTKKWKYPQVNGLTSIKWADN  
PDLNGDVVAIDYKHYP SFKKGAKLLHKPIVWHVNNATNKATYKPNTWCIRCLWSTKPVETSNSFDVLKSEC

3RCDIKDLPKEITVATSRTLSTYKLGASQRVAGDSGFAAYSRYRIGNYKLNTDHSSSSDNIALLVQ\*

QMYKQARSEDKRAKVTSAMQTMFTMLRKLNDALNNIINNARDGCVPLNIPLTTAAKLMVVIPDYNTYK

EPMLQSADAQSFLNGFAV\*

3RCDIKDLPKEITVATSRTLSTYKLGASQRVAGDSGFAAYSRYRIGNYKLNTDHSSSSDNIALLVQ\*  
3RCDIKDLPKEITVATSRTLSTYKLGASQRVAGDSGFAAYSRYRIGNYKLNTDHSSSSDNIALLVQ\*  
3RCDIKDLPKEITVATSRTLSTYKLGASQRVAGDSGFAAYSRYRIGNYKLNTDHSSSSDNIALLVQ\*  
3RCDIKDLPKEITVATSRTLSTYKLGASQRVAGDSGFAAYSRYRIGNYKLNTDHSSSSDNIALLVQ\*  
3RCDIKDLPKEITVATSRTLSTYKLGASQRVAGDSGFAAYSRYRIGNYKLNTDHSSSSDNIALLVQ\*  
3TRNPANNAIVLQLPQGTTLPKGFYAEGRGGSQASSRSSRSRNSSRNSTPGSSRGTSPARMAGNGGDAA  
VSVTSSIVITSGDGTTSPISEHDYQIGGYTEKWESGVKDCVVLHSYFTSDYYQLYSTQLSTDTGVEHVTFYFNKI  
3RCDIKDLPKEITVATSRTLSTYKLGASQRVAGDSGFAAYSRYRIGNYKLNTDHSSSSDNIALLVQ\*

3RCDIKDLPKEITVATSRTLSTYKLGASQRVAGDSGFAAYSRYRIGNYKLNTDHSSSSDNIALLVQ\*

3RCDIKDLPKEITVATSRTLSTYKLGASQRVAGDSGFAAYSRYRIGNYKLNTDHSSSSDNIALLVQ\*

3RCDIKDLPKEITVATSRTLSTYKLGASQRVAGDSGFAAYSRYRIGNYKLNTDHSSSSDNIALLVQ\*

YDCVSFCYMHHMELPTGVHAGTDLEGNFYGPFVDRQTAQAAGTDTTITVNVLAWLYAAVINGDRWFLNRF  
.NRYFRLTLGVYDYLSTQEFYRMYMNSQGLLPPKNSIDAFKLNKLLGVGGKPCIKVATVQSKMSDVKCTSVLLS



YTSKTTVASLINTLNDLNETLVTMPLGYVTHGLNLEEAARYMRSLKVPATVSVSSPDAVTAYNGYLTSSSKTPE

\LALLLLDRLNQLESKMSGKGQQQGGQTVTKKSAAEASKKPRQKRTATKAYNVTQAFGRRGPEQTQGNFGD

NTCDGTTFTYASALWEIQQVVDADSKIVQLSEISMDNSPNLAWPLIVTALRANSVAVKLQNNELSPVALRQMS

INCYLATALLTLQQIELKFNPPALQDAYRARAGEAANFCALILAYCNKTVGELGDVRETMSYLFQHANLDSCK  
)AQGMDNLACEDLKPVSEEVVENPTIQKDVLECNVKTTEVVGDIILKPANNSLKITEEVGHTDLMAAYVDNSS

NTCDGTTFTYASALWEIQQVVDADSKIVQLSEISMDNSPNLAWPLIVTALRANSVAVKLQNNELSPVALRQMS

VLALLLDRLNQLESKMSGKGQQQGQTVTKKSAAEASKKPRQKRTATKAYNVTQAFGRRGPEQTQGNFGD  
VDEPEEHVQIHTIDGSSGVVNPVMEPIYDEPTTTTTSVPL\*

FTTTLNDFNLVAMKYNYEPLTQDHVDILGPLSAQTGIAVLDMCASLKELLQNGMNGRILGSALLEDEFTPFD'  
;VLQQLRVESSSKLWAQCVQLHNDILLAKDTTEAFEKMSVLLSVLLSMQGAVDINKLCEEMLDNRATLQAIAS



EHFIETISLAGSYKDWSYSGQSTQLGIEFLKRGDKSVYYTSNPTTFHLDGEVITFDNLKTLSSLREVRTIKVFTTVD

IQELIRQGTDYKHWPQIAQFAPSASAFFGMSRIGMEVTPSGTWLTYTGAIKLDDKDPNFKDQVILLNKHIDAY

ICAAGTTQACTDDNALAYYNTTKGGRFVLALLSDLQDLKWARFPKSDGTGTIYTELEPPCRFVTDTPKGPKVH

IRVLNVVCKTCGQQQTTLKGVEAVMYMGTLSEYQFKKGVQIPCTCGKQATKYLQQESPFVMMMSAPPAQYH  
LTIKKPNELSRVLGLKTLATHGLAAVNSVPWDTIANYAKPFLNKVVSTTTNIVTRCLNRVCTNYMPYFFTLQLI

ICAAGTTQACTDDNALAYYNTTKGGRFVLALLSDLQDLKWARFPKSDGTGTIYTELEPPCRFVTDTPKGPKVH



QELIRQGTDYKHWPQIAQFAPSASAFFGMSRIGMEVTPSGTWLTYTGAIKLDDKDPNFKDQVILLNKHIDAY

VVRQCSGVTFQSAVKRTIKGTHHWLLLILTSLLVLVQSTQWSLFFFLYENAFLPFAMGIIAMSAFAMMFVKH  
EFSSLPSYAAFATAQEAYEQAVANGDSEVVLKCLKKSLNVAKSEFDRDAAMQRKLEKMADQAMTQMYKQA



›NINLHTQVVDMSMTYGQQFGPTYLDGADVTKIKPHNSHEGKTFYVLPNDDTLRVEAFEYHHTDPSFLGRYI

'KTFPPTPEPKKDKKKKADETQALPQRQKKQQTVLLPAADLDDFSKQLQQSMSSADSTQA\*

‹YLYFIKGLNNLNRGMVLGSLAATVRLQAGNATEVPANSTVLSFCAFAVDAAKAYKDYLASGGQPITNCVKMI

ΞLKHGTFTCASEYTGNYQCGHYKHITSKETLYCIDGALLTKSSEYKGPITDVFYKENSYTTTIKPVTYKLDGVVCTE  
LCTFTRSTNSRIKASMPPTIAKNTVKS VGKFCLEASFNYLKSPNFSKLINIIWFLLSVCLGSLIYSTAALGVLMSN

‹YLYFIKGLNNLNRGMVLGSLAATVRLQAGNATEVPANSTVLSFCAFAVDAAKAYKDYLASGGQPITNCVKMI

'KTFPPTPEKKDKKKKADETQALPQRQKKQQTVTLLPAADLDDFSKQLQQSMSSADSTQA\*

KHAFCLCLLPSLATVAYFNMVYMPASWVMRIMTWLDMVDTSLSGFKLKDCV MYASAVVLLILMTARTVYL  
RSEDKRAKVTSAMQTMFLTMLRKLNDALNNIINNARDGCVPLNIPLTTAAKLMVVIPDYNTYKNTCDGTT



MSALNHTKKWKYPQVNGLTSLIKWADNNCYLATALLTQQIELKFNPPALQDAYYRARAGEAANFCALILAYCI

LCTHTGTGQAITVTPEANMDQESFGGASCCLYCRCHIDHPNPKGFCDLKGKYVQIPTTCANDPVGFTLKNTVI

IDPKLDNYYKKDNSYFTEQPIDLVPNQYPNASFDNFKFVCDNIKFADDLNQLTGYKKPASRELKVTFPPDLN  
LGMPYCTGYREGYLNSTNVTIATYCTGSIPCSVCLSGLDLSTYPSLETIQITISSFKWDLTAFGLVAEWFLAYII

LCTHTGTGQAITVTPEANMDQESFGGASCCLYCRCHIDHPNPKGFCDLKGKYVQIPTTCANDPVGFTLKNTVI

DDGARRVWTLMNVLTLVYKVYYGNALDQAISMWALIISVTSNYSGVVTTVMFLARGIVFMCVEYCPITFITGN  
FTYASALWEIQVVDADSKIVQLSEISMDNSPNLAWPLIVTALRANSVAVKLQNNELSPVALRQMSCAAGTTC





NKTVGELGDVRETMSYLFQHANLDSCRVLNVVCKTCGQQQTTLKGVEAVMYMGTLSYEQFKKGVQIPCTC

CTVCGMWKGYGCSCDQLREPMLQSADAQSFLNGFAV\*

GDVVAIDYKHYTPSFKKGAKLLHKPIVWHVNNATNKATYKPNTWCIRCLWSTKPVETSNSFDVLKSEDAQGM  
\_FTRFFYVLGLAAIMQLFFSYFAVHFISNSWLMWLIINLVQMAPISAMVRMYIFFASFYVWKSYPVHVVDGCN

CTVCGMWKGYGCSCDQLREPMLQSADAQSFLNGFAV\*

JTLQCI MLVYCF LGYFCTCYFGLFCLLNRYFRLTLGVYDYL VSTQEF RYMNSQGLLPKNSIDAFKLN I KLLGVGG  
Q TACTDDNALAYYNTTKGGRFVLALLSDLQDLKWARFPKSDGTGTIYTELEPPCRFVTDTPKGPKVKYLYFIKGI



CGKQATKYLQQESPFVMMMSAPPAQYELKHGTFTCASEYTGNYQCGHYKHITSKETLYCIDGALLTKSSEYKGF

ADNLACEDLKPVSEEVVENPTIQKDVLECNVKTTEVVGDIILKPANNSLKITEEVGHTDLMAAYVDNSSLTIKKP  
ISSTCMMCYKRNRATRVECTTIVNGVRRSFYVYANGGKGFCKLHNWNCVNCDTFCAGSTFISDEVARDLSLQ

IKPCIKVATVQSKMSDVKCTSVVLLSVLQQLRVESSEKSLWAQCVQLHNDILLAKDTTEAFEKMSVLLSVLLSMC  
LNNLNRGMVLGSLAATVRLQAGNATEVPANSTVLSFCAFAVDAAKAYKDYLASGGQPITNCVKMLCTHTGT



ᵀITDVFYKENSYTTTIKPVTYKLDGVVCTEIDPKLDNYYKKDNSYFTEQPIDLVPNQYPNASFDNFKFVCDNIKF

'NELSRVLGLKTLATHGLAAVNSVPWDTIANYAKPFLNKVVSTTTNIVTRCLNRVCTNYMPYFFTLQLCTFTR  
!FKRPINPTDQSSYIVDSVTVKNGSIHLYFDKAGQKTYERHSLSHFVNLDNLRANNTKGSLPINVIVFDGKSKCEI

QGAVDINKLCEEMLDNRATLQAIASEFSSLPSYAAFATAQEAYEQAVANGDSEVVLKLLKSLNVAKSEFDRD/  
GQAITVTPEANMDQESFGGASCCLYCRCHIDHPNPKGFCDLKGKYVQIPTTCANDPVGFTLKN TVCTVCGM\





ADDLNQLTGYKKPASRELKVTFPPDLNGDVVAIDYKHYPSEFKKGAKLLHKPIVWHVNNATNKATYKPNTW

STNSRIKASMPPTIAKNTVKSVMKFCLEASFNYLKSPNFSKLINIIWFLLSVCLGSLIYSTAALGVLMSNLGMP  
ESSAKSASVYYSQLMCQPILLDQALVSDVGDSAQVAVKMFDAYVNTFSSTFNVPMEKLTVAEAEELAKN

\AMQRKLEKMADQAMTQMYKQARSEDKRAKVTSAMQTMLFTMLRKLDNDALNNIINNARDGCVPLNIPI  
WKGYGCSCDQLREPMLQSADAQSFLNGFAV\*



CIRCLWSTKPVETSNSFDVLKSEDAQGMDNLACEDLKPVSEEVVENPTIQKDVLECNVKTTEVVGDIILKPANN

SYCTGYREGYLNSTNVTIATYCTGSIPCSVCLSGLDSDTYPSELETIQITISSFKWDLTAFGLVAEWFLAYILFTRFF  
IVSLDNVLSTFISAARQGFVDSVETKDVVECLKLSHQSDIEVTGDSCNNYMLTYNKVENMTPRDLGACIDCS,

LTAAKLMVVIPDYNTYKNTCDGTTFTYASALWEIQVVDADSKIVQLSEISMDNSPNLAWPLIVTALRANSA



QSLKITEEVGHTDLMAAYVDNSSLTIKKPNELSRVLGLKTLATHGLAAVNSVPWDTIANYAKPFLNKVVSTTTN|

YVLGLAAIMQLFFSYFAVHFISNSWLMWLIINLVQMAPISAMVRMYIFFASFYYVWKSYPVHVVDGCNSSTCM  
ARHINAQVAKSHNIALIWNVKDFMSLSEQLRKQIRSAKKNNLPFKLTCATTRQVVNVVTTKIALKGGKIVNN



.VKLQNNELSPVALRQMCAAGTTQTACTDDNALAYNNTKGGRFVLALLSDLQDLKWARFPKSDGTGTIYTI



IVTRCLNRVCTNYMPYFFTLQLCTFTRSTNSRIKASMPPTIAKNTVKSVMKFCLEASFN

IMCYKRNRRATRVECTTIVNGVRRSFYVYANGGKGFCKLHNWNCVNCDTFCAGSTFISDEVAR  
WLKQLIKVTLVFLFVAAIFYLITPVHVMKHTDFSSEIIGYKAIDGGVTRDIASDTDCFAN

ELEPPCRFVTDTPKGPVKYLYFIKGLNNLNRGMVLGSLAATVRLQAGNATEVPANSTVLSFCAFAVDAKAY





KDYLASGGQPIT

| subgenome | ref_leader_end | peak_leader_ref_TRS_start | peak_TRS_start | peak_count |                            |
|-----------|----------------|---------------------------|----------------|------------|----------------------------|
| S         | 65             | 65                        | 21552          | 21552      | 14498(14323,4484,4373,538) |
| ORF3a     | 69             | 69                        | 25385          | 25385      | 6021(5795,0,0,1920)        |
| E         | 69             | 69                        | 26237          | 26237      | 1826(1779,41,41,642)       |
| M         | 65             | 65                        | 26469          | 26469      | 3728(3690,1602,1588,2042)  |
| ORF6      | 69             | 69                        | 27041          | 27041      | 3590(3540,2068,2038,3234)  |
| ORF7a     | 69             | 69                        | 27388          | 27388      | 972(921,54,39,290)         |
| ORF7b     | 65             | 65                        | 27644          | 27644      | 21(19,0,0,14)              |
| ORF8      | 65             | 65                        | 27884          | 27884      | 1083(1065,0,0,238)         |
| N         | 65             | 64                        | 28256          | 28255      | 5167(5084,3468,3434,2220)  |
| ORF10     | 65             | 68                        | 29530          | 29538      | 2(2,0,0,2)                 |

The numbers in the bracket are (reads with left primers, reads with right primers, reads with both primers, reads with both primers and TRS).  
 Normalized count=(Read count/Total number of read mapped on reference genome)\*1000000.  
 Total number of read mapped on reference genome is 46368772, excluding the mapped reads un-  
 “ref\_leader\_end” and “peak\_leader\_end” point to the reference position of the end of leader and



| peak_normalized_count       | cluster_count         | cluster_normalized_count            |
|-----------------------------|-----------------------|-------------------------------------|
| 312.67(308.89,96.70,94.31,  | 18395(18152,6698,656, | 396.71(391.47,144.45,141.56,119.56) |
| 129.85(124.98,0.00,0.00,41  | 6334(6095,0,0,1968)   | 136.60(131.45,0.00,0.00,42.44)      |
| 39.38(38.37,0.88,0.88,13.85 | 1826(1779,41,41,642)  | 39.38(38.37,0.88,0.88,13.85)        |
| 80.40(79.58,34.55,34.25,44  | 4947(4841,1686,1665,2 | 106.69(104.40,36.36,35.91,50.51)    |
| 77.42(76.34,44.60,43.95,69  | 3643(3593,2108,2078,3 | 78.57(77.49,45.46,44.81,70.35)      |
| 20.96(19.86,1.16,0.84,6.25) | 996(944,55,40,290)    | 21.48(20.36,1.19,0.86,6.25)         |
| 0.45(0.41,0.00,0.00,0.30)   | 30(26,1,1,18)         | 0.65(0.56,0.02,0.02,0.39)           |
| 23.36(22.97,0.00,0.00,5.13) | 1123(1104,0,0,238)    | 24.22(23.81,0.00,0.00,5.13)         |
| 111.43(109.64,74.79,74.06,  | 8243(8075,5794,5737,2 | 177.77(174.15,124.95,123.73,53.70)  |
| 0.04(0.04,0.00,0.00,0.04)   | 2(2,0,0,2)            | 0.04(0.04,0.00,0.00,0.04)           |

primers, same junction on paired reads with at least a primer).

paired, not primary alignment and supplementary alignment.

the position of the end of leader identified in the most common reads (peak count) on the

reference genome, and “ref\_TRS\_start” and “peak\_TRS\_start” refer to the reference position of

the start of TRS and the position of the start of TRS identified in the most common reads (peak

count) on the reference genome.

| subgenome | peak_leader_peak_TRS_start | ACGAAC | ATG_position | 20_leader_sequence | TRS_seq               |
|-----------|----------------------------|--------|--------------|--------------------|-----------------------|
| S         | 65                         | 21552  | yes          | 21563              | ATCTCTTGTA CTAAACGAAC |
| ORF3a     | 69                         | 25385  | yes          | 25393              | CTTGTAGATC ACGAACTT   |
| E         | 69                         | 26237  | yes          | 26245              | CTTGTAGATC ACGAACTT   |
| M         | 65                         | 26469  | yes          | 26523              | ATCTCTTGTA CTAAACGAAC |
| ORF6      | 69                         | 27041  | yes          | 27202              | CTTGTAGATC ACGAACGCTT |
| ORF7a     | 69                         | 27388  | yes          | 27394              | CTTGTAGATC ACGAAC     |
| ORF7b     | 65                         | 27644  | no           | 27756              | ATCTCTTGTA CTAAACTGTT |
| ORF8      | 65                         | 27884  | yes          | 27894              | ATCTCTTGTA CTAAACGAAC |
| N         | 64                         | 28255  | yes          | 28274              | GATCTCTTGT TCTAAACGAA |
| ORF10     | 68                         | 29538  | no           | 29538              | TCTTGTAGAT -          |

“peak\_leader” and “peak\_TRS\_start” point to the leader-TRS junctions in sheet "known", “ACGA

first\_orf\_aa

MFVFLVLLPLVSSQCVNLTRTQLPPAYTNSFTRGVVYYPDKVFRSSVLHSTQDLFLPFFSNVTWFHAIHVSGTN  
MDLFMRIFTIGTVTLKQGEIKDATPSDFVRATATIPIQASLPFGWLIVGVALLAVFQSASKIITLKKRWQLALSKG  
MYSFVSEETGLIVNSVLLFLAFVVFLVTLAILTALRLCAYCCNIVNVSLVKPSFYVYSRVKLNSSRVPDLLV\*  
MADSNGTITVEELKKLLEQWNLVIGFLFTWICLLQFAYANRNRFLYIIKLIFLWLLWPVTLACFVLAAYRINWI  
MFHLVDFQVTIAEILLIIMRTFKVSIWNLDYIINLIKNLSKSLTENKYSQLDEEQPMEID\*  
MKIILFLALITLATCELYHYQECVRGTTVLLKEPCSSGTYEGNSPFHPLADNKFALTCFSTQFAFACPDGVKHVYC  
MIELSLIDFYLCFLAFLLFLVLIIMLIIFWFSLELQDHNETCHA\*  
MKFLVFLGIITTVAAFHQECSLQSQCTQHQPYYVDDPCPIHFYSKWYIRVGARKSAPLIELCVDEAGSKSPIQYIDI  
MSDNGPQNQRNAPRITFGGSPDSTGSNQNGERSGARSKQRRPQGLPNNTASWFTALTQHGKEDLKFRGC  
MQTTQGRWAI\*

.AC" indicates if there is a ACGAAC sequence in the "TRS\_seq" (TRS sequences), "20\_leader\_seq"

GTKRFDNPVLPFNDGVYFASTEKSNIIRGWIFGTTLDSKTQSLIVNNATNVVIKVCEFQFCNDPFLGVVYHKNN  
iVHFVCNLLLLFVTVYSHLLLVAAGLEAPFLYLYALVYFLQSINFRRIIMRLWLCWKCRSKNPLLYDANYFLCWHTI

ITGGIAIAMAACLVGLMWLSYFIASFRLFARTRSMWSFNPETNILLNVPLHGTILTRPPLLESELVIGAVILRGHLRIA

LRARSVSPKLFIRQEEVQELYSPIFLIVAAIVFITLCFTLKRKTE\*

GNYSVCLPFTINCQEPKLGSLVVRCSFYEDFLEYHDVRVVLDFI\*

GVPIINTNSSPDDQIGYYRRATRRIRGGDGKMKDLSRWYFYLLGTGPEAGLPYGANKDGIWVATEGALNTP

refers to the 20 nucleotides before the end of leader, and "AUG\_postion" and "first\_orf\_aa" ref

IKSWMESEFRVYSSANNCTFEYVSQPFLMDLEGKQGNFKNLREFVFKNIDGYFKIYSKHTPINLVRDLPQGFSAL  
NCYDYCIPYNSVTSSIVITSGDGTTSPISEHDYQIGGYTEKWESGVKDCVVLHSYFTSDYYQLYSTQLSTDTGVEH

GHHLGRCDIKDLPKEITVATSRTLSYYKLGASQRVAGDSGFAAYSRYRIGNYKLNTDHSSSSDNIALLVQ\*

KDHIGTRNPANNAIIVLQLPQGTTLPKGFYAEGSRGGSQASSRSSSRNSSRNSTPGSSRGTS Parmagngc

er to the first AUG position and translated orf of the sgmRNA.



..EPLVDLPIGINITRFQTLALHRSYLTPGDSSSGWTAGAAAYVGYLQPRTFLLKYNENGTITDAVDCALDPLSE`  
VTFFIYNKIVDEPEEHVQIHTIDGSSGVVNPVMEPIYDEPTTTTSVPL\*

3DAALALLLDRLNQLESKMSGKGQQQGGQTVTKKSAAEASKKPRQKRTATKAYNVTQAFGRRGPEQTQGN

TKCTLKSFTVEKGIYQTSNFRVQPTESIVRFPNITNLCPFGEVFNATRFASVYAWNRKRISNCVADYSVLYNSASF

FGDQELIRQGTDYKHWPQIAQFAPSASAFFGMSRIGMEVTPSGTWLTYTGAIKLDDKDPNFKDQVILLNKHID

STFKCYGVSPTKLNDLCFTNVYADSFVIRGDEVQRQIAPGQTGKIADYNYKLPDDFTGCVIAWNSNNLDSKVGGI

YAYKTFPTEPKKDKKKKADETQALPQRQKKQQTVTLLPAADLDDFSKQLQQSMSSADSTQA\*

NYNYLYRLFRKSNLKPFERDISTEIYQAGSTPCNGVEGFNCYFPLQSYGFQPTNGVGYQPYRVVLSFELLHAPA

TVCGPKKSTNLVKNKCVNFNFNGLTGTGVLTESNKKFLPFQQFGRDIADTTDAVRDPQLEILDITPCSFGGVS

VITPGTNTSNQVAVLYQDVNCTEVPVAIHADQLTPTWRVYSTGSNVFQTRAGCLIGAEHVNNSYECDIPGAG

ICASYQTQTNSPRRARSVASQSIAYTMSLGAENSVAYSNNNSIAIPTNFTISVTTEILPVSMTKTSVDCTMYICGD:

STECNLLLQYGSFCTQLNRALTGIAVEQDKNTQEVFAQVKQIYKTPPIKDFGGFNFSQILPDPSKPSKRSFIEDLL



.FNKVTLADAGFIKQYGDCLGDIAARDLICAQKFNGLTVLPPLTDEMIAQYTSALLAGTITSGWTFGAGAALQIF

³FAMQMAYRFNGIGVTQNVLYENQKLIANQFNSAIGKIQDLSSTASALGKLQDVVNQNAQALNTLVKQLSSI

NFGAISSVLNDILSRDKVEAEVQIDRLITGRLQSLQTYVTQQLIRAAEIRASANL

| subgenome | leader_end | TRS_start | nb_count                  | normalized_count               |
|-----------|------------|-----------|---------------------------|--------------------------------|
| 1         | 47         | 26421     | 45(45,6,6,6)              | 0.97(0.97,0.13,0.13,0.13)      |
| 2         | 64         | 6935      | 15(12,7,6,6)              | 0.32(0.26,0.15,0.13,0.13)      |
| 3         | 65         | 3913      | 17(17,0,0,4)              | 0.37(0.37,0.00,0.00,0.09)      |
| 4         | 65         | 4577      | 15(9,7,5,6)               | 0.32(0.19,0.15,0.11,0.13)      |
| 5         | 65         | 5807      | 12(12,4,4,4)              | 0.26(0.26,0.09,0.09,0.09)      |
| 6         | 65         | 6495      | 34(2,4,2,2)               | 0.73(0.04,0.09,0.04,0.04)      |
| 7         | 65         | 8113      | 52(36,23,8,44)            | 1.12(0.78,0.50,0.17,0.95)      |
| 8         | 65         | 10020     | 22(20,14,12,16)           | 0.47(0.43,0.30,0.26,0.35)      |
| 9         | 65         | 10636     | 39(36,4,4,6)              | 0.84(0.78,0.09,0.09,0.13)      |
| 10        | 65         | 11664     | 14(14,0,0,4)              | 0.30(0.30,0.00,0.00,0.09)      |
| 11        | 48         | 26443     | 100(100,12,12,12)         | 2.16(2.16,0.26,0.26,0.26)      |
| 12        | 65         | 13730     | 110(14,94,0,6)            | 2.37(0.30,2.03,0.00,0.13)      |
| 13        | 66         | 736       | 17(0,0,0,0)               | 0.37(0.00,0.00,0.00,0.00)      |
| 14        | 66         | 3360      | 103(10,45,5,42)           | 2.22(0.22,0.97,0.11,0.91)      |
| 15        | 66         | 5635      | 35(34,0,0,12)             | 0.75(0.73,0.00,0.00,0.26)      |
| 16        | 66         | 5773      | 14(8,3,3,2)               | 0.30(0.17,0.06,0.06,0.04)      |
| 17        | 66         | 6181      | 21(2,1,0,0)               | 0.45(0.04,0.02,0.00,0.00)      |
| 18        | 66         | 10857     | 13(11,3,3,8)              | 0.28(0.24,0.06,0.06,0.17)      |
| 19        | 66         | 13865     | 48(1,1,0,0)               | 1.04(0.02,0.02,0.00,0.00)      |
| 20        | 66         | 14679     | 1679(1,1677,0,0)          | 36.21(0.02,36.17,0.00,0.00)    |
| 21        | 66         | 22502     | 32(24,0,0,4)              | 0.69(0.52,0.00,0.00,0.09)      |
| 22        | 67         | 2194      | 35(2,0,0,0)               | 0.75(0.04,0.00,0.00,0.00)      |
| 23        | 67         | 2292      | 72(72,0,0,10)             | 1.55(1.55,0.00,0.00,0.22)      |
| 24        | 67         | 3362      | 49(46,26,26,30)           | 1.06(0.99,0.56,0.56,0.65)      |
| 25        | 67         | 3916      | 26(1,25,0,0)              | 0.56(0.02,0.54,0.00,0.00)      |
| 26        | 67         | 4018      | 151(139,54,53,78)         | 3.26(3.00,1.16,1.14,1.68)      |
| 27        | 67         | 5875      | 35(3,0,0,0)               | 0.75(0.06,0.00,0.00,0.00)      |
| 28        | 67         | 7505      | 14(8,4,4,6)               | 0.30(0.17,0.09,0.09,0.13)      |
| 29        | 67         | 8205      | 13(2,3,2,2)               | 0.28(0.04,0.06,0.04,0.04)      |
| 30        | 52         | 21491     | 11(9,2,0,0)               | 0.24(0.19,0.04,0.00,0.00)      |
| 31        | 67         | 13691     | 25(2,0,0,0)               | 0.54(0.04,0.00,0.00,0.00)      |
| 32        | 67         | 13916     | 28(5,2,0,4)               | 0.60(0.11,0.04,0.00,0.09)      |
| 33        | 67         | 14663     | 12(10,0,0,6)              | 0.26(0.22,0.00,0.00,0.13)      |
| 34        | 67         | 22278     | 39(5,2,2,2)               | 0.84(0.11,0.04,0.04,0.04)      |
| 35        | 67         | 22404     | 39(23,14,0,8)             | 0.84(0.50,0.30,0.00,0.17)      |
| 36        | 67         | 22490     | 26(23,0,0,6)              | 0.56(0.50,0.00,0.00,0.13)      |
| 37        | 67         | 22503     | 156(151,4,4,42)           | 3.36(3.26,0.09,0.09,0.91)      |
| 38        | 68         | 738       | 11(0,0,0,0)               | 0.24(0.00,0.00,0.00,0.00)      |
| 39        | 68         | 2689      | 1607(1572,1445,1413,1381) | 34.66(33.90,31.16,30.47,29.85) |
| 40        | 68         | 4580      | 555(542,486,482,516)      | 11.97(11.69,10.48,10.39,11.13) |
| 41        | 68         | 5789      | 174(170,38,36,70)         | 3.75(3.67,0.82,0.78,1.51)      |
| 42        | 55         | 21538     | 15(9,5,4,4)               | 0.32(0.19,0.11,0.09,0.09)      |

|    |    |       |                           |                                |
|----|----|-------|---------------------------|--------------------------------|
| 43 | 68 | 8072  | 19(15,0,0,2)              | 0.41(0.32,0.00,0.00,0.04)      |
| 44 | 68 | 14223 | 29(23,2,2,10)             | 0.63(0.50,0.04,0.04,0.22)      |
| 45 | 68 | 14686 | 15(1,11,0,0)              | 0.32(0.02,0.24,0.00,0.00)      |
| 46 | 68 | 15777 | 763(703,12,12,258)        | 16.46(15.16,0.26,0.26,5.56)    |
| 47 | 55 | 26458 | 12(2,3,2,2)               | 0.26(0.04,0.06,0.04,0.04)      |
| 48 | 68 | 18051 | 12(9,0,0,2)               | 0.26(0.19,0.00,0.00,0.04)      |
| 49 | 68 | 21926 | 39(36,1,0,4)              | 0.84(0.78,0.02,0.00,0.09)      |
| 50 | 68 | 23365 | 13(13,4,4,12)             | 0.28(0.28,0.09,0.09,0.26)      |
| 51 | 55 | 26461 | 26(24,2,2,2)              | 0.56(0.52,0.04,0.04,0.04)      |
| 52 | 68 | 25425 | 17(1,16,0,10)             | 0.37(0.02,0.35,0.00,0.22)      |
| 53 | 69 | 705   | 33(23,0,0,2)              | 0.71(0.50,0.00,0.00,0.04)      |
| 54 | 69 | 1897  | 17(5,1,1,0)               | 0.37(0.11,0.02,0.02,0.00)      |
| 55 | 69 | 3816  | 158(151,0,0,50)           | 3.41(3.26,0.00,0.00,1.08)      |
| 56 | 69 | 7186  | 16(11,6,3,0)              | 0.35(0.24,0.13,0.06,0.00)      |
| 57 | 69 | 7503  | 34(30,15,14,18)           | 0.73(0.65,0.32,0.30,0.39)      |
| 58 | 69 | 9713  | 17(15,0,0,6)              | 0.37(0.32,0.00,0.00,0.13)      |
| 59 | 69 | 10640 | 95(87,32,32,40)           | 2.05(1.88,0.69,0.69,0.86)      |
| 60 | 69 | 11356 | 30(27,6,6,14)             | 0.65(0.58,0.13,0.13,0.30)      |
| 61 | 69 | 12615 | 38(1,4,0,4)               | 0.82(0.02,0.09,0.00,0.09)      |
| 62 | 69 | 13619 | 105(104,46,46,56)         | 2.26(2.24,0.99,0.99,1.21)      |
| 63 | 69 | 13679 | 25(23,0,0,12)             | 0.54(0.50,0.00,0.00,0.26)      |
| 64 | 69 | 18554 | 25(25,10,10,14)           | 0.54(0.54,0.22,0.22,0.30)      |
| 65 | 69 | 19112 | 138(129,105,96,118)       | 2.98(2.78,2.26,2.07,2.54)      |
| 66 | 69 | 19571 | 31(18,2,2,6)              | 0.67(0.39,0.04,0.04,0.13)      |
| 67 | 69 | 21305 | 25(24,6,6,10)             | 0.54(0.52,0.13,0.13,0.22)      |
| 68 | 69 | 21358 | 42(1,0,0,0)               | 0.91(0.02,0.00,0.00,0.00)      |
| 69 | 69 | 22559 | 14(10,0,0,0)              | 0.30(0.22,0.00,0.00,0.00)      |
| 70 | 70 | 913   | 17(14,12,12,12)           | 0.37(0.30,0.26,0.26,0.26)      |
| 71 | 70 | 2794  | 1860(1838,1666,1648,1648) | 40.11(39.64,35.93,35.54,37.57) |
| 72 | 70 | 2851  | 27(23,19,17,18)           | 0.58(0.50,0.41,0.37,0.39)      |
| 73 | 70 | 3862  | 11(2,0,0,2)               | 0.24(0.04,0.00,0.00,0.04)      |
| 74 | 70 | 6472  | 240(10,6,6,6)             | 5.18(0.22,0.13,0.13,0.13)      |
| 75 | 70 | 7077  | 15(7,4,4,4)               | 0.32(0.15,0.09,0.09,0.09)      |
| 76 | 70 | 10820 | 20(3,17,0,0)              | 0.43(0.06,0.37,0.00,0.00)      |
| 77 | 70 | 11779 | 20(19,12,12,14)           | 0.43(0.41,0.26,0.26,0.30)      |
| 78 | 70 | 11812 | 14(13,8,8,10)             | 0.30(0.28,0.17,0.17,0.22)      |
| 79 | 70 | 14372 | 47(45,0,0,8)              | 1.01(0.97,0.00,0.00,0.17)      |
| 80 | 70 | 14670 | 17(10,5,0,6)              | 0.37(0.22,0.11,0.00,0.13)      |
| 81 | 70 | 22277 | 97(91,14,14,28)           | 2.09(1.96,0.30,0.30,0.60)      |
| 82 | 70 | 22502 | 459(405,4,4,138)          | 9.90(8.73,0.09,0.09,2.98)      |
| 83 | 70 | 22522 | 112(3,0,0,0)              | 2.42(0.06,0.00,0.00,0.00)      |
| 84 | 70 | 27761 | 33(30,6,6,12)             | 0.71(0.65,0.13,0.13,0.26)      |
| 85 | 71 | 734   | 15(1,0,0,0)               | 0.32(0.02,0.00,0.00,0.00)      |

|     |    |       |                  |                             |
|-----|----|-------|------------------|-----------------------------|
| 86  | 71 | 4586  | 23(20,20,20,20)  | 0.50(0.43,0.43,0.43,0.43)   |
| 87  | 71 | 4592  | 40(36,36,36,36)  | 0.86(0.78,0.78,0.78,0.78)   |
| 88  | 71 | 5594  | 29(25,0,0,4)     | 0.63(0.54,0.00,0.00,0.09)   |
| 89  | 71 | 5708  | 124(14,109,0,6)  | 2.67(0.30,2.35,0.00,0.13)   |
| 90  | 71 | 10772 | 39(31,0,0,14)    | 0.84(0.67,0.00,0.00,0.30)   |
| 91  | 71 | 12208 | 15(1,0,0,0)      | 0.32(0.02,0.00,0.00,0.00)   |
| 92  | 71 | 12412 | 33(2,2,2,2)      | 0.71(0.04,0.04,0.04,0.04)   |
| 93  | 71 | 13313 | 11(1,4,0,4)      | 0.24(0.02,0.09,0.00,0.09)   |
| 94  | 71 | 13583 | 16(14,8,8,12)    | 0.35(0.30,0.17,0.17,0.26)   |
| 95  | 59 | 735   | 12(1,0,0,0)      | 0.26(0.02,0.00,0.00,0.00)   |
| 96  | 71 | 18943 | 36(32,0,0,8)     | 0.78(0.69,0.00,0.00,0.17)   |
| 97  | 71 | 22403 | 36(1,33,0,0)     | 0.78(0.02,0.71,0.00,0.00)   |
| 98  | 71 | 22409 | 27(23,3,0,4)     | 0.58(0.50,0.06,0.00,0.09)   |
| 99  | 71 | 22498 | 26(22,0,0,4)     | 0.56(0.47,0.00,0.00,0.09)   |
| 100 | 71 | 23926 | 249(1,245,0,0)   | 5.37(0.02,5.28,0.00,0.00)   |
| 101 | 60 | 2285  | 20(15,0,0,0)     | 0.43(0.32,0.00,0.00,0.00)   |
| 102 | 72 | 2689  | 44(10,39,8,8)    | 0.95(0.22,0.84,0.17,0.17)   |
| 103 | 60 | 2613  | 12(11,0,0,2)     | 0.26(0.24,0.00,0.00,0.04)   |
| 104 | 72 | 9284  | 18(6,0,0,4)      | 0.39(0.13,0.00,0.00,0.09)   |
| 105 | 72 | 9889  | 12(7,0,0,2)      | 0.26(0.15,0.00,0.00,0.04)   |
| 106 | 72 | 15808 | 18(16,0,0,6)     | 0.39(0.35,0.00,0.00,0.13)   |
| 107 | 72 | 22107 | 11(6,5,0,4)      | 0.24(0.13,0.11,0.00,0.09)   |
| 108 | 72 | 22511 | 17(2,0,0,0)      | 0.37(0.04,0.00,0.00,0.00)   |
| 109 | 60 | 4007  | 26(17,8,8,8)     | 0.56(0.37,0.17,0.17,0.17)   |
| 110 | 73 | 3372  | 13(13,9,9,8)     | 0.28(0.28,0.19,0.19,0.17)   |
| 111 | 73 | 3776  | 38(6,2,2,4)      | 0.82(0.13,0.04,0.04,0.09)   |
| 112 | 73 | 4027  | 28(12,3,2,4)     | 0.60(0.26,0.06,0.04,0.09)   |
| 113 | 73 | 8145  | 22(22,13,13,18)  | 0.47(0.47,0.28,0.28,0.39)   |
| 114 | 73 | 8957  | 22(1,0,0,0)      | 0.47(0.02,0.00,0.00,0.00)   |
| 115 | 73 | 14371 | 11(3,2,0,0)      | 0.24(0.06,0.04,0.00,0.00)   |
| 116 | 60 | 13994 | 11(10,0,0,2)     | 0.24(0.22,0.00,0.00,0.04)   |
| 117 | 73 | 22285 | 11(2,0,0,0)      | 0.24(0.04,0.00,0.00,0.00)   |
| 118 | 73 | 23028 | 35(29,4,4,8)     | 0.75(0.63,0.09,0.09,0.17)   |
| 119 | 74 | 165   | 1809(6,1800,0,0) | 39.01(0.13,38.82,0.00,0.00) |
| 120 | 60 | 20306 | 11(9,0,0,0)      | 0.24(0.19,0.00,0.00,0.00)   |
| 121 | 74 | 5890  | 15(8,6,6,6)      | 0.32(0.17,0.13,0.13,0.13)   |
| 122 | 74 | 5893  | 25(8,0,0,0)      | 0.54(0.17,0.00,0.00,0.00)   |
| 123 | 74 | 6721  | 46(0,9,0,6)      | 0.99(0.00,0.19,0.00,0.13)   |
| 124 | 74 | 6724  | 32(0,5,0,4)      | 0.69(0.00,0.11,0.00,0.09)   |
| 125 | 74 | 6853  | 36(1,1,0,0)      | 0.78(0.02,0.02,0.00,0.00)   |
| 126 | 74 | 7704  | 24(19,0,0,8)     | 0.52(0.41,0.00,0.00,0.17)   |
| 127 | 74 | 12407 | 12(7,4,4,4)      | 0.26(0.15,0.09,0.09,0.09)   |
| 128 | 74 | 12742 | 13(5,0,0,2)      | 0.28(0.11,0.00,0.00,0.04)   |

|     |    |       |                      |                           |
|-----|----|-------|----------------------|---------------------------|
| 129 | 74 | 12974 | 107(101,62,60,84)    | 2.31(2.18,1.34,1.29,1.81) |
| 130 | 74 | 13630 | 24(2,2,2,2)          | 0.52(0.04,0.04,0.04,0.04) |
| 131 | 60 | 22933 | 28(3,0,0,2)          | 0.60(0.06,0.00,0.00,0.04) |
| 132 | 74 | 19227 | 11(10,6,6,10)        | 0.24(0.22,0.13,0.13,0.22) |
| 133 | 74 | 21058 | 290(281,129,126,198) | 6.25(6.06,2.78,2.72,4.27) |
| 134 | 74 | 21091 | 11(5,2,2,2)          | 0.24(0.11,0.04,0.04,0.04) |
| 135 | 74 | 22507 | 20(16,4,4,6)         | 0.43(0.35,0.09,0.09,0.13) |
| 136 | 74 | 26199 | 11(1,0,0,0)          | 0.24(0.02,0.00,0.00,0.00) |
| 137 | 75 | 137   | 46(43,0,0,0)         | 0.99(0.93,0.00,0.00,0.00) |
| 138 | 75 | 21561 | 19(14,4,4,2)         | 0.41(0.30,0.09,0.09,0.04) |
| 139 | 75 | 26486 | 55(49,24,24,30)      | 1.19(1.06,0.52,0.52,0.65) |
| 140 | 78 | 21564 | 31(9,8,4,0)          | 0.67(0.19,0.17,0.09,0.00) |
| 141 | 79 | 17389 | 72(1,0,0,0)          | 1.55(0.02,0.00,0.00,0.00) |
| 142 | 63 | 2460  | 35(35,0,0,2)         | 0.75(0.75,0.00,0.00,0.04) |
| 143 | 63 | 2791  | 19(19,14,14,16)      | 0.41(0.41,0.30,0.30,0.35) |
| 144 | 63 | 3924  | 32(32,0,0,10)        | 0.69(0.69,0.00,0.00,0.22) |
| 145 | 46 | 26422 | 27(27,4,4,4)         | 0.58(0.58,0.09,0.09,0.09) |
| 146 | 63 | 4566  | 42(42,38,38,40)      | 0.91(0.91,0.82,0.82,0.86) |
| 147 | 63 | 5785  | 237(234,66,63,112)   | 5.11(5.05,1.42,1.36,2.42) |
| 148 | 63 | 8048  | 13(11,0,0,2)         | 0.28(0.24,0.00,0.00,0.04) |
| 149 | 63 | 12514 | 21(1,0,0,0)          | 0.45(0.02,0.00,0.00,0.00) |
| 150 | 63 | 22270 | 14(2,0,0,0)          | 0.30(0.04,0.00,0.00,0.00) |

The numbers in the bracket are (reads with left primers, reads with right primers, reads with both primers, reads with no primers)  
Normalized count=(Read count/Total number of read mapped on reference genome)\*1000000.  
Total number of read mapped on reference is 46368772, excluding the mapped reads unpaired, not  
“leader\_end” and “TRS\_start” refer to the position of the end of leader and the position of the start









primers, same junction on paired reads with at least a primer).

: primary alignment and supplementary alignment.

: of TRS identified in the reads >10.

| subgenome | leader_end | TRS_start | ACGAAC | ATG_postion | known_ATG | 20_leader_se |
|-----------|------------|-----------|--------|-------------|-----------|--------------|
| 1         | 47         | 26421     | yes    | 26523       | M         | CAAACCAACC   |
| 2         | 64         | 6935      | no     | 7025        | -         | GATCTCTTGT   |
| 3         | 65         | 3913      | no     | 3948        | -         | ATCTCTTGTA   |
| 4         | 65         | 4577      | no     | 4590        | -         | ATCTCTTGTA   |
| 5         | 65         | 5807      | no     | 5859        | -         | ATCTCTTGTA   |
| 6         | 65         | 6495      | no     | 6551        | -         | ATCTCTTGTA   |
| 7         | 65         | 8113      | no     | 8133        | -         | ATCTCTTGTA   |
| 8         | 65         | 10020     | no     | 10070       | -         | ATCTCTTGTA   |
| 9         | 65         | 10636     | no     | 10662       | -         | ATCTCTTGTA   |
| 10        | 65         | 11664     | no     | 11697       | -         | ATCTCTTGTA   |
| 11        | 48         | 26443     | yes    | 26523       | M         | AAACCAACCA   |
| 12        | 65         | 13730     | no     | 13736       | -         | ATCTCTTGTA   |
| 13        | 66         | 736       | no     | 785         | -         | TCTCTTGTAG   |
| 14        | 66         | 3360      | no     | 3375        | -         | TCTCTTGTAG   |
| 15        | 66         | 5635      | no     | 5681        | -         | TCTCTTGTAG   |
| 16        | 66         | 5773      | no     | 5859        | -         | TCTCTTGTAG   |
| 17        | 66         | 6181      | no     | 6243        | -         | TCTCTTGTAG   |
| 18        | 66         | 10857     | no     | 10875       | -         | TCTCTTGTAG   |
| 19        | 66         | 13865     | no     | 13898       | -         | TCTCTTGTAG   |
| 20        | 66         | 14679     | no     | 14699       | -         | TCTCTTGTAG   |
| 21        | 66         | 22502     | no     | 22614       | -         | TCTCTTGTAG   |
| 22        | 67         | 2194      | no     | 2456        | -         | CTCTTGTAGA   |
| 23        | 67         | 2292      | no     | 2456        | -         | CTCTTGTAGA   |
| 24        | 67         | 3362      | no     | 3375        | -         | CTCTTGTAGA   |
| 25        | 67         | 3916      | no     | 3948        | -         | CTCTTGTAGA   |
| 26        | 67         | 4018      | no     | 4044        | -         | CTCTTGTAGA   |
| 27        | 67         | 5875      | no     | 5919        | -         | CTCTTGTAGA   |
| 28        | 67         | 7505      | no     | 7531        | -         | CTCTTGTAGA   |
| 29        | 67         | 8205      | no     | 8214        | -         | CTCTTGTAGA   |
| 30        | 52         | 21491     | no     | 21536       | -         | CAACCAACTT   |
| 31        | 67         | 13691     | no     | 13736       | -         | CTCTTGTAGA   |
| 32        | 67         | 13916     | no     | 13928       | -         | CTCTTGTAGA   |
| 33        | 67         | 14663     | no     | 14699       | -         | CTCTTGTAGA   |
| 34        | 67         | 22278     | no     | 22359       | -         | CTCTTGTAGA   |
| 35        | 67         | 22404     | no     | 22407       | -         | CTCTTGTAGA   |
| 36        | 67         | 22490     | no     | 22614       | -         | CTCTTGTAGA   |
| 37        | 67         | 22503     | no     | 22614       | -         | CTCTTGTAGA   |
| 38        | 68         | 738       | no     | 785         | -         | TCTTGTAGAT   |
| 39        | 68         | 2689      | no     | 2745        | -         | TCTTGTAGAT   |
| 40        | 68         | 4580      | no     | 4590        | -         | TCTTGTAGAT   |
| 41        | 68         | 5789      | no     | 5859        | -         | TCTTGTAGAT   |
| 42        | 55         | 21538     | yes    | 21563       | S         | CCAACCTTTCG  |

|    |    |           |         |             |
|----|----|-----------|---------|-------------|
| 43 | 68 | 8072 no   | 8081 -  | TCTTGTAGAT  |
| 44 | 68 | 14223 no  | 14258 - | TCTTGTAGAT  |
| 45 | 68 | 14686 no  | 14699 - | TCTTGTAGAT  |
| 46 | 68 | 15777 no  | 15812 - | TCTTGTAGAT  |
| 47 | 55 | 26458 yes | 26523 M | CCAAC TTTCG |
| 48 | 68 | 18051 no  | 18153 - | TCTTGTAGAT  |
| 49 | 68 | 21926 no  | 21936 - | TCTTGTAGAT  |
| 50 | 68 | 23365 no  | 23403 - | TCTTGTAGAT  |
| 51 | 55 | 26461 yes | 26523 M | CCAAC TTTCG |
| 52 | 68 | 25425 no  | 25457 - | TCTTGTAGAT  |
| 53 | 69 | 705 no    | 726 -   | CTTGTAGATC  |
| 54 | 69 | 1897 no   | 1977 -  | CTTGTAGATC  |
| 55 | 69 | 3816 no   | 3842 -  | CTTGTAGATC  |
| 56 | 69 | 7186 no   | 7210 -  | CTTGTAGATC  |
| 57 | 69 | 7503 no   | 7531 -  | CTTGTAGATC  |
| 58 | 69 | 9713 no   | 9768 -  | CTTGTAGATC  |
| 59 | 69 | 10640 no  | 10662 - | CTTGTAGATC  |
| 60 | 69 | 11356 no  | 11367 - | CTTGTAGATC  |
| 61 | 69 | 12615 no  | 12634 - | CTTGTAGATC  |
| 62 | 69 | 13619 no  | 13625 - | CTTGTAGATC  |
| 63 | 69 | 13679 no  | 13685 - | CTTGTAGATC  |
| 64 | 69 | 18554 no  | 18594 - | CTTGTAGATC  |
| 65 | 69 | 19112 no  | 19148 - | CTTGTAGATC  |
| 66 | 69 | 19571 no  | 19631 - | CTTGTAGATC  |
| 67 | 69 | 21305 no  | 21317 - | CTTGTAGATC  |
| 68 | 69 | 21358 no  | 21397 - | CTTGTAGATC  |
| 69 | 69 | 22559 no  | 22614 - | CTTGTAGATC  |
| 70 | 70 | 913 no    | 966 -   | TTGTAGATCT  |
| 71 | 70 | 2794 no   | 2802 -  | TTGTAGATCT  |
| 72 | 70 | 2851 no   | 2871 -  | TTGTAGATCT  |
| 73 | 70 | 3862 no   | 3948 -  | TTGTAGATCT  |
| 74 | 70 | 6472 no   | 6551 -  | TTGTAGATCT  |
| 75 | 70 | 7077 no   | 7089 -  | TTGTAGATCT  |
| 76 | 70 | 10820 no  | 10844 - | TTGTAGATCT  |
| 77 | 70 | 11779 no  | 11849 - | TTGTAGATCT  |
| 78 | 70 | 11812 no  | 11849 - | TTGTAGATCT  |
| 79 | 70 | 14372 no  | 14381 - | TTGTAGATCT  |
| 80 | 70 | 14670 no  | 14699 - | TTGTAGATCT  |
| 81 | 70 | 22277 no  | 22359 - | TTGTAGATCT  |
| 82 | 70 | 22502 no  | 22614 - | TTGTAGATCT  |
| 83 | 70 | 22522 no  | 22614 - | TTGTAGATCT  |
| 84 | 70 | 27761 no  | 27825 - | TTGTAGATCT  |
| 85 | 71 | 734 no    | 785 -   | TGTAGATCTC  |

|     |    |          |         |             |
|-----|----|----------|---------|-------------|
| 86  | 71 | 4586 no  | 4590 -  | TGTAGATCTG  |
| 87  | 71 | 4592 no  | 4607 -  | TGTAGATCTG  |
| 88  | 71 | 5594 no  | 5681 -  | TGTAGATCTG  |
| 89  | 71 | 5708 no  | 5718 -  | TGTAGATCTG  |
| 90  | 71 | 10772 no | 10791 - | TGTAGATCTG  |
| 91  | 71 | 12208 no | 12219 - | TGTAGATCTG  |
| 92  | 71 | 12412 no | 12417 - | TGTAGATCTG  |
| 93  | 71 | 13313 no | 13338 - | TGTAGATCTG  |
| 94  | 71 | 13583 no | 13625 - | TGTAGATCTG  |
| 95  | 59 | 735 no   | 785 -   | CTTTCGATCTG |
| 96  | 71 | 18943 no | 18956 - | TGTAGATCTG  |
| 97  | 71 | 22403 no | 22407 - | TGTAGATCTG  |
| 98  | 71 | 22409 no | 22422 - | TGTAGATCTG  |
| 99  | 71 | 22498 no | 22614 - | TGTAGATCTG  |
| 100 | 71 | 23926 no | 24051 - | TGTAGATCTG  |
| 101 | 60 | 2285 no  | 2456 -  | TTTCGATCTC  |
| 102 | 72 | 2689 no  | 2745 -  | GTAGATCTGT  |
| 103 | 60 | 2613 no  | 2630 -  | TTTCGATCTC  |
| 104 | 72 | 9284 no  | 9288 -  | GTAGATCTGT  |
| 105 | 72 | 9889 no  | 9926 -  | GTAGATCTGT  |
| 106 | 72 | 15808 no | 15812 - | GTAGATCTGT  |
| 107 | 72 | 22107 no | 22155 - | GTAGATCTGT  |
| 108 | 72 | 22511 no | 22614 - | GTAGATCTGT  |
| 109 | 60 | 4007 no  | 4044 -  | TTTCGATCTC  |
| 110 | 73 | 3372 no  | 3375 -  | TAGATCTGTT  |
| 111 | 73 | 3776 no  | 3780 -  | TAGATCTGTT  |
| 112 | 73 | 4027 no  | 4044 -  | TAGATCTGTT  |
| 113 | 73 | 8145 no  | 8148 -  | TAGATCTGTT  |
| 114 | 73 | 8957 no  | 9019 -  | TAGATCTGTT  |
| 115 | 73 | 14371 no | 14381 - | TAGATCTGTT  |
| 116 | 60 | 13994 no | 14021 - | TTTCGATCTC  |
| 117 | 73 | 22285 no | 22359 - | TAGATCTGTT  |
| 118 | 73 | 23028 no | 23046 - | TAGATCTGTT  |
| 119 | 74 | 165 no   | 266 -   | AGATCTGTTC  |
| 120 | 60 | 20306 no | 20309 - | TTTCGATCTC  |
| 121 | 74 | 5890 no  | 5919 -  | AGATCTGTTC  |
| 122 | 74 | 5893 no  | 5919 -  | AGATCTGTTC  |
| 123 | 74 | 6721 no  | 6770 -  | AGATCTGTTC  |
| 124 | 74 | 6724 no  | 6770 -  | AGATCTGTTC  |
| 125 | 74 | 6853 no  | 7025 -  | AGATCTGTTC  |
| 126 | 74 | 7704 no  | 7758 -  | AGATCTGTTC  |
| 127 | 74 | 12407 no | 12417 - | AGATCTGTTC  |
| 128 | 74 | 12742 no | 12759 - | AGATCTGTTC  |

|     |    |           |         |            |
|-----|----|-----------|---------|------------|
| 129 | 74 | 12974 no  | 12986 - | AGATCTGTTC |
| 130 | 74 | 13630 no  | 13685 - | AGATCTGTTC |
| 131 | 60 | 22933 no  | 23004 - | TTTCGATCTC |
| 132 | 74 | 19227 no  | 19283 - | AGATCTGTTC |
| 133 | 74 | 21058 no  | 21071 - | AGATCTGTTC |
| 134 | 74 | 21091 no  | 21188 - | AGATCTGTTC |
| 135 | 74 | 22507 no  | 22614 - | AGATCTGTTC |
| 136 | 74 | 26199 no  | 26231 - | AGATCTGTTC |
| 137 | 75 | 137 no    | 266 -   | GATCTGTTCT |
| 138 | 75 | 21561 no  | 21563 S | GATCTGTTCT |
| 139 | 75 | 26486 no  | 26523 M | GATCTGTTCT |
| 140 | 78 | 21564 no  | 21744 - | CTGTTCTCTA |
| 141 | 79 | 17389 no  | 17399 - | TGTTCTCTAA |
| 142 | 63 | 2460 no   | 2630 -  | CGATCTCTTG |
| 143 | 63 | 2791 no   | 2802 -  | CGATCTCTTG |
| 144 | 63 | 3924 no   | 3948 -  | CGATCTCTTG |
| 145 | 46 | 26422 yes | 26523 M | ACAAACCAAC |
| 146 | 63 | 4566 no   | 4590 -  | CGATCTCTTG |
| 147 | 63 | 5785 no   | 5859 -  | CGATCTCTTG |
| 148 | 63 | 8048 no   | 8081 -  | CGATCTCTTG |
| 149 | 63 | 12514 no  | 12519 - | CGATCTCTTG |
| 150 | 63 | 22270 no  | 22359 - | CGATCTCTTG |

“peak\_leader” and “peak\_TRS\_start” point to the leader-TRS junctions in sheet "novel", “ACGAAC”

TRS\_seq first\_orf\_aa  
CTCTCGTGT. MADSNGTITVEELKKLLEQWNLVIGFLFTWICLLQFAYANRNRFLYIIKLIFLWLLWPVTLACI  
TCTAAACTGAMSNLGMPSYCTGYREGYLNSTNVTIATYCTGSIPCSVCLSGLDSDTYPSELETIQITISSFKWDL  
TGAAAGTAA/ MIRKSKLVLKKLQQLWKKLSSSQKTCYFILTLMAIFIQILPLLLVTLTSL\*  
CTAACGATC MKLLLQCHLAM\*  
ATAGACGGT( MFSTKKTVTQQP\*  
TTAAACCAGC MAAYVDNSSLTIKKNELSRVLGLKTLATHGLAAVNSVPWDTIANYAKPFLNKVVSTTTNIVT  
AGAAGCTGA/ MCP\*  
CACCACAAAC MAFPSGKVEGCMVQVTCGTTTTLNGLWLDDVVYCPRHVICTSEDMLNPNYEDLLIRKSNHN  
TGGTACGGA( MF\*  
TCAACCGCTA MIT\*  
TCTTCTAGAG MADSNGTITVEELKKLLEQWNLVIGFLFTWICLLQFAYANRNRFLYIIKLIFLWLLWPVTLACI  
CTAAAC MTSL\*  
TCAAGAAA( MRELNGGAYTRYVDNFCGPDGYPLECIKDLLARAGKASCTLSEQLDFIDTKRGVYCCREHE  
TAAACTTAC MYTLKMQTLWKKLKR\*  
TAAACAAGC1 MMSAPPAQYELKHGFTFCASEYTGNYQCGHYKHITSKETLYCIDGALLTKSSEYKGPITDVFYI  
TAAACATATA MFSTKKTVTQQP\*  
TAAACTACTAC MLTMQLIKPRINQIPGVYVVFQAQNLKHQIRLMY\*  
TAAAAGAAT1 MV\*  
TAAAAGAAA` MMIISIKRTGMIL\*  
TAATTTTAAAC. MTLCLRVSLRKEVLLN\*  
CAAACCTCTA MLGTGRESATVLLIILSYIIPHHFPLLSVMECLLN\*  
AGACGGTTG( MPLKAPKEIIFLEGETLPTEVLTEEVLKTGDLQPLEQPTSEAVEAPLVGTPVCINGLMLEIKD  
AGACATTCTT MPLKAPKEIIFLEGETLPTEVLTEEVLKTGDLQPLEQPTSEAVEAPLVGTPVCINGLMLEIKD  
AAACTTACTG MYTLKMQTLWKKLKR\*  
AAGTAAACCT1 MIRKSKLVLKKLQQLWKKLSSSQKTCYFILTLMAIFIQILPLLLVTLTSL\*  
AAACTTGTTA MAIFIQILPLLLVTLTSL\*  
AAACAGTTAC MVLVQKLTLSWTIIIRKTIISQSNQLIYQTNHIQTQASIILSYVIISNLLMI\*  
AAACGTAATA/ MYNYC\*  
AAACTAAAG MLLNVLNCHINLT\*  
GTAGACTTAT MFLTTKRTMFVFLVLLPLVSSQCVNLTRTQLPPAYTNSFTRGVYYPDKVFRSSVLHSTQDLI  
AAACAATTTA MTSL\*  
AAAAGGACT( MIL\*  
AAACTGTCAA/ MTLCLRVSLRKEVLLN\*  
AAACTTTACT MWVIFNLGLFY\*  
AAA MEPLQML\*  
AAAGGAATC` MLGTGRESATVLLIILSYIIPHHFPLLSVMECLLN\*  
AAACTTCTAA MLGTGRESATVLLIILSYIIPHHFPLLSVMECLLN\*  
AAGAAAAC( MRELNGGAYTRYVDNFCGPDGYPLECIKDLLARAGKASCTLSEQLDFIDTKRGVYCCREHE  
AACAAACAA1 MTL\*  
AACGATCTAA/ MKLLLQCHLAM\*  
AAAGAAACT1 MFSTKKTVTQQP\*  
GTTCTTGTTA. MFVFLVLLPLVSSQCVNLTRTQLPPAYTNSFTRGVYYPDKVFRSSVLHSTQDLFLPFFSNVTV



AACGTACCA MEKCLKLVATAEAEELAKNVSLDNVSTFISAARQGFVSDVETKDVVECLKLSHQSDIEVTGD  
AACAAAGCC1MTRKRG\*  
AACAAAGAC1MTLLCLRVSLRKEVLLN\*  
AAAGAACTTTMFLCLKQNVGLRLTLLKDLNMFALNIQC\*  
GATCTTCTGGMADSNGTITVEELKKLLEQWNLVIGFLFTWICLLQFAYANRNRFLYI1KLIFLWLLWPVTLACI  
AACAGGACT1MC\*  
AACGCTACTA MLLLKSVNFNFM1HFVVFITTKTKVGVKVSSEFILVRI1ALLNMSLSLFLWTLKENRVISKIL  
AACAAATACTMLTAQKSLLLFMQINLLLLGVFILQVLMFFKHVQAV\*  
CTTCTGGTCT.MADSNGTITVEELKKLLEQWNLVIGFLFTWICLLQFAYANRNRFLYI1KLIFLWLLWPVTLACI  
AACTGTA ACT MLLLQILFALLQRYRYKPHSLSDGLLLALHFLFFRALPKS\*  
ACGAGCTTG1MKIFKKTGTLN1AVVLPVNSCVSLTEGHTLAMSITTSVALMATLLSALKTF\*  
ACGATCAATTMEFHSH\*  
ACAAACTTGT MKSEKQVEQK1AEIPKEEVKPFITESKPSVEQRKQDDKK1KACVEEVTTTLEETKFLTENLLLYID  
ACAAATTACC MGFNCFWLSCRVVFGIYSFH\*  
ACAAACGTA1MYNYC\*  
ACAAAGCAT1MVFPLVLLK1LRCAPFC\*  
ACGGACACA1MF\*  
AAGA ACTGT1MMMVLGECGHL\*  
ACAATTCACC MASYCNSFKGQFCCQITE\*  
ACGAAG MT1\*  
ACCAAC MKKQF1IYL1RIVQ1LLNMTSLSLE\*  
ACACACTTAA MGTWL\*  
ACAAAGCTT1MPHILTNSQM1VYAYFG1AMSIDILL1PLFVDLTLECYLTLTCLVVMVAVCM\*  
ACAAACAATT MWLLML\*  
GCGAACAAA1MVMSCMQ1TYFGGIQ1QFSCLP1LYLT\*  
ACAAATCCA1MSKFPLK1L1RGTAVMSLKEGQINDM1LSLLSKGR1LI1RENNRV1SSDVLVNN\*  
ACAAACTTGT MLGTGRESATVLL1ILSY1I1PHHF1LLSVMECLLN\*  
CGAACAACT1MSMKLLGTRNV1L1KRAMNCR1HLLKLNWQRN1LTPSMGNVQ1LYFP\*  
TGA ACTTG MKGLIKYLMRSALPIQLNSVQK\*  
TGA ACTCGG1MSSPVLWQMLS\*  
TGAACAAA1MIRKSKLV1LKKLQQLWKKLSSSQKTCYFILTLMAIFIQ1LPLLLVTLTSLS\*  
CGAAGTTGT1MAAYVDNSSLTIKKPNELSRV1LGLKTLATHGLAAVNSVPWDTIANYAKPFLNKVVSTTTNIVT  
TGA ACTCTAC MSL1LQPTV1LVLYLVV1FVLV\*  
CAA ACTGGA1MCASLKELLQNGMNGRTILGSALLEDEFTPF1DVVRQCSGVTFQSAVKRTIKGTHHWLLLTILT  
CAA ACTCAAC MSDVKCTSVV1L1SVLQQLRV1ESSKLWAQCVQLHNDILLAKDTTEAFEK1MVSLLSVLLSMQC  
CAA ACCTTGT MSDVKCTSVV1L1SVLQQLRV1ESSKLWAQCVQLHNDILLAKDTTEAFEK1MVSLLSVLLSMQC  
CAA ACTTTA MFYSLQCSHLQVLDH\*  
CAA ACCCGG1MTLLCLRVSLRKEVLLN\*  
CAA ACTTTAC MWVIFNLGLFY\*  
CAA ACTTCTA MLGTGRESATVLL1ILSY1I1PHHF1LLSVMECLLN\*  
CCA ACCAACA1MLGTGRESATVLL1ILSY1I1PHHF1LLSVMECLLN\*  
TGA ACTTTCA ML1IFWFSLE1LQDHNETCHA\*  
TTCAAGAAA MRELNGGAYTRYVDN1NFC1PDG1PLECIKDLLARAGKASCTLSEQ1LDFIDTKRGVYCCREHE

CTAA MKLLLQCHLAM\*  
GAAACTCTTG MPLGYVTHGLNLEEAARYMRSCLKVPATVSVSSPDAVTAYNGYLTSSSKTPEEHFIETISLAGSY  
GAACAATTTA MMSAPPAQYELKHGTFTCASEYTGNYQCGHYKHITSKETLYCIDGALLTKSSEYKGPITDVFYI  
GAACTTAAGC MVHLLVLVSTLVITSVVTINI\*  
GAACCTCTAA MLTY\*  
GAAGTCTTTG MWLNLNLTVMQPCNVSWKRWLIK\*  
CAACA MQEMVVP\*  
GTACAAATAC MTLWVLHLKTQSVPSAVCGKVMVAVVINSANPCFSQLMHNRF\*  
TCCTAAAAAC MTI\*  
TTCAAGAAA/ MRELNGGAYTRYVDNDFCGPDGYPLECIKDLLARAGKASCTLSEQLDFIDTKRGVYCCREHE  
GAACTGAAG/ MRLVERFNTWLLKLHY\*  
GAAA MEPLQML\*  
GGAACCATT/ ML\*  
CTATCAAAC MLGTGRESATVLLIILSYIIPHHFLLSVMECLLN\*  
TTACAAAACA MLASSNMVIALVILLLETSFVHKSLTALLFCHLCSQMK\*  
AGTGTTTCAAG/ MPLKAPKEIIFLEGETLPTEVLTEEVLKTGDLQPLEQPTSEAVEAPLVGTPVCINGLMLEIKD  
AACAAACAA1MTL\*  
TTTGTATTAA/ MLEIKDTEKYCALAPNMMVTNNTFTLKGAPTKVTFGDDTVIEVQGYKSVNITFELDERIDI  
AACA MIITDLYQEFV\*  
AGCTCTTTAT/ MDTTSYREAAACCHLAKALNDFSNVSDVLYQPPQTSITSAVLQSGFRKMAFSPGKVEGCMV  
AACA MFCLCKQNVGLRLTLKDLNMFALNIQC\*  
AACAGGGTA/ MVILKYILSTRLLI\*  
AACTTTAGAC/ MLGTGRESATVLLIILSYIIPHHFLLSVMECLLN\*  
TTCCTCACAG MAIFIQILPLLVTLSLS\*  
ACA MYTLKMQTLWKKLKR\*  
ACAA MST\*  
ACTTTATATT/ MAIFIQILPLLVTLSLS\*  
ACA MSYLLLFQQLGKGLLIQM\*  
ACACCATCAA MYNF\*  
GCAAACCTTA MFYSLQCSSLQVLDH\*  
CTTTGTAAA MPCEMLVLLVY\*  
ACTTGCTTTA/ MWVIFNLGLFY\*  
ACTTTCCTTT/ MVSNPLMVLTNHT\*  
GAGTAACTCC/ MESLVPGFNEKTHVQLSLPVLQVRDVLVRGFGDSVEEVLSEARQHLKDGTCGLVEVEKGVLF  
GCT MPNIFMEILVIVS\*  
AACCATAAA/ MVLFVQKLTLSWTIIRKILISQSNQLILYQTNHIQTQASIILSYIISNLLMI\*  
CATAAAACCA/ MVLFVQKLTLSWTIIRKILISQSNQLILYQTNHIQTQASIILSYIISNLLMI\*  
AACTACTAAC MPYFFTLQLCTFTRSTNSRIKASMPPTIAKNTVKSVMKFCLEASFNYLKSPNFSKLINIIWFLI  
TACTAACATA MPYFFTLQLCTFTRSTNSRIKASMPPTIAKNTVKSVMKFCLEASFNYLKSPNFSKLINIIWFLI  
TACTATAGCA MSNLGMPYCTGYREGYLNSTNVTIATYCTGSIPCSVCLSGLDSDTYPSELETIQITISSFKWDL  
CAATAAATCC MVPSIFTLIKLVKRLMKDILSLILLT\*  
ATTATCAACA MQEMVVP\*  
ACAACTGCT MTMR\*

CTAAATAGAC MVLGSLAATVRLQAGNATEVPANSTVLSFCAFAVDAAKAYKDYLASGGQPITNCVKMLCTH  
AATTTAATTG MKKQFIIYLRIVQLLLNMSTLSLE\*  
GAAGTCTAA1MVLKVLIVTFLYNHMVSNPLMVLVTNHTE\*  
CATTGTTTGT.MVAVCM\*  
CCTAAGACTA MLQKKMTLKRVSFTFVGLYNKS\*  
TCTAAAGAGC MLIFISSWDTSHGGQPLLLM\*  
TTCTAACTTT/ MLGTGRESATVLLIILSYIIPHHFPLLSVMECLLN\*  
GACTACTAGC MSTNLCTHSFRKRQVR\*  
TAACTAATTA MESLVPGFNEKTHVQLSLPVLQVRDVLVRGFGDSVEEVLSEARQHDKDGTGCLVEVEKGVLF  
CA MFVFLVLLPLVSSQCVNLTRTQLPPAYTNSFTRGVYYPDKVFRSSVLHSTQDLFLPFFSNVTV  
TATATTAGTT MADSNGTITVEELKKLLEQWNLVIGFLFTWICLLQFAYANRNRFLYIIKLIFLWLLWPVTLACI  
TGTTTGT TTT MLLGSMLYMSLGPMLRGLITLSYHLMMVFILLPLRSLT\*  
AGTGTTGTCA MPDYVLSTMCTLATLLNYLHHAHC\*  
CTCTAAAAGC MLEIKDTEKYCALAPNMMVTNNTFTLKGGAPTKVTFGDDTVIEVQGYKSVNITFELDERIDI  
TTTTGAACTT MKGLIKYLMRSALPIQLNSVQK\*  
CTTCAGTTGA MIRKSKLVLKKLQQLWKKLSSSQKTCYFILTLMAIFIQILPLLLVTLTSL\*  
TCTCGTGTTA MADSNGTITVEELKKLLEQWNLVIGFLFTWICLLQFAYANRNRFLYIIKLIFLWLLWPVTLACI  
TTATCAACAC MKLLLQCHLAM\*  
TTCTAAAGAA MFSTKKTVTQQP\*  
GTTAATACGT MEKLTLVATAEAEELAKNVSLDNVLSTFISAARQGFVDSVETKDVVECLKLSHQSDIEVTGD  
GTGTG MVQHLLMHQHCGKSNRL\*  
TAGGTTTCAA MWVIFNLGLFY\*

indicates if there is a ACGAAC sequences in the "TRS\_seq" (TRS sequences), "20\_leader\_seq" re

FVLAAYRINWITGGIAIAMAACLVGLMWLSYFIASFRLFARTRSMWSFNPETNILLNVPLHGTILTRP LLESELV  
.TAFGLVAEWFLAYILFTRFFYVLGLAAIMQLFFSYFAVHFISNSWLMWLIINLVQMAPISAMVRMYIFFASFYY

TRCLNRVCTNYMPYFFTL LLLQLCTFTRSTNSRIKASMPPTIAKNTVKSVGKFCLEASFNYLKSPNFSKLINIIWFLI  
FLVQAGNVQLRVIGHSMQNCV LKLVDTANPKTPKYKFVRIQPGQTFSVLACYNGSPSGVYQCAMRPNFTIK

FVLAAYRINWITGGIAIAMAACLVGLMWLSYFIASFRLFARTRSMWSFNPETNILLNVPLHGTILTRP LLESELV  
HEIAWYTERSEKSYELQTPFEIKLAKKFDTFNGECPNFVPLNSIIKTIQPRVEKKKLDGFMGRIRSVYPVASPNE  
KENSYTTTIKPVTYKLDGVVCTEIDPKLDNYYKKDNSYFTEQPIDLVPNQPYPNASFDNFKFVCDNIKFADDLNI

ITEKYCALAPNMMVTNNTFTL KGGAPTKVTFGDDTVIEVQGYKSVNITFELDERIDKVLNEKCSAYTVELGTEV  
ITEKYCALAPNMMVTNNTFTL KGGAPTKVTFGDDTVIEVQGYKSVNITFELDERIDKVLNEKCSAYTVELGTEV

FLPFFSNVTWFHAIHVSGTNGTKRFDNPVLPFNDGVYFASTEKSNIIRGWIFGTTLDSKTQSL L L V N N A T N V V I K

HEIAWYTERSEKSYELQTPFEIKLAKKFDTFNGECPNFVPLNSIIKTIQPRVEKKKLDGFMGRIRSVYPVASPNE

MFHAIHVSGTNGTKRFDNPVLPFNDGVYFASTEKSNIIRGWIFGTTLDSKTQSL L L V N N A T N V V I K V C E F Q C N I

ISCNNYMLTYNKVENMTPRDLGACIDCSARHINAQVAKSHNIALIWNVVKDFMSSLSEQLRKQIRSAAKKNLPI

FVLAAYRINWITGGIAIAMACLVGLMWLSYFIASFRLFARTRSMWSFNPETNILLNVPLHGTILTRP LLESELV

GNLCLRILMVILKYILSTRLLI\*

FVLAAYRINWITGGIAIAMACLVGLMWLSYFIASFRLFARTRSMWSFNPETNILLNVPLHGTILTRP LLESELV

INGNLHPDSATLVSDIDITFLKKDAPYIVGDVVQEGVLTAVVIPTKKAGGTTEMLAKALRKVPTDNYITTPGQ

RCLNRVCTNYMPYFFTL LLLQLCTFTRSTNSRIKASMPPTIAKNTVKSVMKFCLEASFNYLKSPNFSKLINIIIIWFLI

SLLVLVQSTQWSLFFFLYENAF LPPFAMGIIAMSAFAMMFVKHKHAF LCLFLLPSLATVAYFNMVYMPASWV  
AVDINKLCEEMLDNRATLQAIASEFSSLPSYAAFATAQEAYEQAVANGDSEVVLK LK LKSLNVAKSEFDRDAA  
AVDINKLCEEMLDNRATLQAIASEFSSLPSYAAFATAQEAYEQAVANGDSEVVLK LK LKSLNVAKSEFDRDAA

HEIAWYTERSEKSYELQTPFEIKLAKKFDTFNGECPNFVPLNSIIKTIQPRVEKKKLDGFMGRIRSVYPVASPNE

IKDWSYSGQSTQLGIEFLKRGDKSVYYTSNPTTFHLDGEVITFDNLKTLSSLREVRTIKVFTTVDNINLHTQVVDI  
KENSYTTTIKPVTYKLDGVVCTEIDPKLDNYYKKDNSYFTEQPIDLVPNQYPYNASFDNFKFVCDNIKFADDLNC

HEIAWYTERSEKSYELQTPFEIKLAKKFDTFNGECPNFVFPPLNSIIKTIQPRVEKKKLDGFMGRIRSVYPVASPNE

ITEKYCALAPNMMVTNNTFTLKGKAPTKVTFGDDTVIEVQGYKSVNITFELDERIDKVLNEKCSAYTVELGTEV  
KVLNEKCSAYTVELGTEVNEFACVVADAVIKTLQPVSELLPLGIDLDEWSMATYYLFDESGEFKLASHMYCSF  
QVTCGTTTLNGLWLDDVVYCPRHVICTSEDMLNPNYEDLLIRKSNHNFLVQAGNVQLRVIGHSMQNCVLKL

QLEQPYVFIKRS DARTAPHGHVMVELVAELEGIQYGRSGETLGVLVPHVGEIPVAYRKVLLRKNNGKAGGF

LLSVCLGSLIYSTAALGVLMNSNLGMPSYCTGYREGYLNSTNVTIATYCTGSIPCSVCLSGLDSDTYP SLETIQITIS  
LLSVCLGSLIYSTAALGVLMNSNLGMPSYCTGYREGYLNSTNVTIATYCTGSIPCSVCLSGLDSDTYP SLETIQITIS  
.TAFGLVAEWFLAYILFTRFFYVLGLAAIMQLFFSYFAVHFISNSWLMWLIINLVQMAPISAMVRMYIFFASFY

ITGTGQAITVTPEANMDQESFGGASCCLYCRCHIDHPNPKGFCDLKGKYVQIPTTCANDPVGFTLKNTVCTVC

QLEQPYVFIKRS DARTAP HGHVMVELVAELEGIQYGRSGETLGVLVPHVGEIPVAYRKVLLRKNGNKGAGGF  
MFHAIHVSGTNGTKRFDNPVLPFNDGVYFASTEKSNIIRGWIFGTTLDSKTQSLIVNNATNVVIKVCEFQFCNI  
FVLAAYRINWITGGIAIAMA CLVGLMWLSYFIASFRLFARTRSMWSFNPETNILLNVPLHGTILTRP LLESELV

KVLNEKCSAYTVELGTEVNEFACVVADAVIKTLQPVSELLTPLGIDLDEWSMATYYLFDESGEFKLASHMYCSF

FVLAAYRINWITGGIAIAMA CLVGLMWLSYFIASFRLFARTRSMWSFNPETNILLNVPLHGTILTRP LLESELV

ISCNNYMLTYNKVENMTPRDLGACIDCSARHINAQVAKSHNIALIWNV KDFMSLSEQLRKQIRSAAKKNLPI

fers to the 20 sequences before the end of the leader, "AUG\_postion" and "first\_orf\_aa" refer i

IGAVILRGHLRIAGHHLGRCDIKDLPKEITVATSRTLSYYKLGASQRVAGDSGFAAYSRYRIGNYKLNTDHSSSE  
'VWKSYPVHVVDGCNSSTCMMCYKRNRRATRVECTTIVNGVRRSFYVYANGGKGFCKLHNWNCVNCDTFCAG

.LSVCLGSLIYSTAALGVLMNSNLGMPYCTGYREGYLNSTNVTIATYCTGSIPCSVCLSGLDSDTYPSELETIQITIS  
<GSFLNGSCGSVGFNIDYDCVSFCYMHHMELPTGVHAGTDLEGNFYGPFVDRQTAQAAGDTTITVNVLAW

IGAVILRGHLRIAGHHLGRCDIKDLPKEITVATSRTLSYYKLGASQRVAGDSGFAAYSRYRIGNYKLNTDHSSSE  
:CNQMCLSTLMKCDHCGETSWQTGDFVKATCEFCGTENLTKEGATTCGYLPQNAVVKIYCPACHNSEVGPEI  
QLTGYKKPASRELKVTFFPDLNGDVVAIDYKHYTPSFKKGAKLLHKPIVWHVNNATNKATYKPNTWCIRCLWS

'NEFACVVADAVIKTLQPVSELLTPLGIDLDEWSMATYYLFDESGEFKLASHMYCSFYPPDEDEEEGDCEEEFE  
'NEFACVVADAVIKTLQPVSELLTPLGIDLDEWSMATYYLFDESGEFKLASHMYCSFYPPDEDEEEGDCEEEFE

<VCEFQFCNDPFLGVYYHKNNKSWMESEFRVYSSANNCTFEYVSQPFLMDLEGKQGNFKNLREFVFKNIDGY

:CNQMCLSTLMKCDHCGETSWQTGDFVKATCEFCGTENLTKEGATTCGYLPQNAVVKIYCPACHNSEVGPEI

DPFLGVYYHKNNKSWMESEFRVYSSANNCTFEYVSQPFLMDLEGKQGNFKNLREFVFKNIDGYFKIYSKHTPI



FKLTCATTRQVVNVVTTKIALKGGKIVNNWLKQLIKVTLVFLFVAAIFYLITPVHVMSKHTDFSSEIIGYKAIDGG

IGAVILRGHLRIAGHHLGRCDIKDLPKEITVATSRTLSYYKLGASQRVAGDSGFAAYSRYRIGNYKLNTDHSSSSSE

IGAVILRGHLRIAGHHLGRCDIKDLPKEITVATSRTLSYYKLGASQRVAGDSGFAAYSRYRIGNYKLNTDHSSSSSE

IGLNGYTVEEAKTVLKKCKSAFYILPSIISNEKQEILGTVSWNLREMLAHAEETRKLMPVVCVETKAIVSTIQRKYK

.LSVCLGSLIYSTAALGVLMNSNLGMPSTYCTGYREGYLNSTNVTIATYCTGSIPCSVCLSGLDSDTYSLETIQITIS

MRIMTWLDMVDTSLSGFKLKDCVMYASAVVLLILMTARTVYDDGARRVWTLMNVLTLVYKVYYGNALDQ/  
MQRKLEKMADQAMTQMYKQARSEDKRAKVTSAMQTMFTMLRKLDNDALNNIINNARDGCVPLNIIPLT  
MQRKLEKMADQAMTQMYKQARSEDKRAKVTSAMQTMFTMLRKLDNDALNNIINNARDGCVPLNIIPLT

:CNQMCLSTLMKCDHCGETSWQTGDFVKATCEFCGTENLTKEGATTGYPQNAVVKIYCPACHNSEVGPEH

MSMTYGQQFGPTYLDGADVTKIKPHNSHEGKTFYVLPNDDTLRVEAFEYHHTDPSFLGRYMSALNHTKKW  
QLTGYKKPASRELKVTFPDLNGDVVAIDYKHYPSTFKKGAKLLHKPIVWHVNNATNKATYKPNTWCIRCLWS

ICNQMCLSTLMKCDHCGETSWQTGDFVKATCEFCGTENLTKEGATTCGYLPQNAVVKIYCPACHNSEVGPEI

NEFACVVADAVIKTLQPVSELLTPLGIDLDEWSMATYYLFDESGEFKLASHMYCSFYPPDEDEEEGDCEEEFE  
YPPDEDEEEGDCEEEFEFSTQYEGTEDDYQGKPLEFGATSAALQPEEEQEEDWLDDDSQQTVGQQDGSE  
.KVDTANPKTPKYKFVRIQPGQTFSVLACYNGSPSGVYQCAMRPNFTIKGSFLNGSCGSGVFNIDYDCVSFCYM

ISYGADLKSFDLGDELGTDPTYEDFQENWNTKHSSGVTRELMRELNGGAYTRYVDNNEFCGPDGYPLECIKDLL

ISFKWDLTAFGLVAEWFLAYILFTRFFYVLGLAAIMQLFFSYFAVHFISNSWLMWLIINLVQMAPISAMVRMYI  
ISFKWDLTAFGLVAEWFLAYILFTRFFYVLGLAAIMQLFFSYFAVHFISNSWLMWLIINLVQMAPISAMVRMYI  
'VWKSYPVHVVDGCNSSTCMMCYKRNRRATRVECTIVNGVRRSFYVYANGGKGFCKLHNWNCVNCDTFCAC

CGMWKGYGCSCDQLREPMLQSADAQSFLNGFAV\*

HSYGADLKSFDLGDELGTDPYEDFQENWNTKHSSGVTRELMRELNGGAYTRYVDNNFCGPDGYPLECIKDLL  
DPFLGVYYHKNNKSWMESEFRVYSSANNCTFEYVSQPFLMDLEGKQGNFKNLREFVFKNIDGYFKIYSKHTPI  
IGAVILRGHLRIAGHHLGRCDIKDLPKEITVATSRTLSYYKLGASQRVAGDSGFAAYSRYRIGNYKLNTDHSSSSI

YPPDEDEEEGDCEEEEFEPSTQYEGTEDDYQGKPLEFGATSAALQPEEEQEEDWLDDDSQQTVGQQDGSE

IGAVILRGHLRIAGHHLGRCDIKDLPKEITVATSRTLSYYKLGASQRVAGDSGFAAYSRYRIGNYKLNTDHSSSSI

FKLTCATTRQVVNVVTTKIALKGGKIVNNWLKQLIKVTLVFLFVAAIFYLITPVHVMSKHTDFSSEIIGYKAIDGG

to the first AUG position and translated orf of the sgmRNA, and “known\_ATG” indicates if the fi

DNIALLVQ\*

STFISDEVARDLSLQFKRPINPTDQSSYIVDSVTVKNGSIHLYFDKAGQKTYERHSLSHFVNLDNLRANNTKGS

SFKWDLTAFGLVAEWFLAYILFTRFFYVLGLAAIMQLFFSYFAVHFISNSWLMWLIINLVQMAPISAMVRMYI

/LYAAVINGDRWFLNRFTTTLNDFNLVAMKYNYEPLTQDHVDILGPLSAQTGIAVLDMCASLKELLQNGMNC

DNIALLVQ\*

SLAEYHNESGLKTILRKGGRTIAFGGCVFSYVGCHNKCAYWVPRASANIGCNHTGVVGESEGLNDNLEIL

STKPVETSNSFDVLKSEDAQGMDNLACEDLKPVSEEVVENPTIQKDVLECNVKTTEVVGDIIKPANNSLKITEE

PSTQYEYGTEDDYQGKPLEFGATSAALQPEEEQEEDWLDDDSQQTVGQQDGSEDNQTITTIQTIVEVQPQLI

PSTQYEYGTEDDYQGKPLEFGATSAALQPEEEQEEDWLDDDSQQTVGQQDGSEDNQTITTIQTIVEVQPQLI

FKIYSKHTPINLVRDLPQGFSALEPLVDLPIGINITRFQTLALHRSYLTPGDSSSGWTAGAAAYVGYLQPRFTI

SLAEYHNESGLKTILRKGGRTIAFGGCVFSYVGCHNKCAYWVPRASANIGCNHTGVVGESEGLNDNLEIL

INLVRDLPQGFSALEPLVDLPIGINITRFQTLALHRSYLTPGDSSSGWTAGAAAYVGYLQPRFTLLKYNENGTI

VTRDIASDTDCFANKHADFDTWFSQRGGSYTNDKACPLIAAVITREVG FVVPGLPGTILRTTNGDFLHFLPRVI

DNIALLVQ\*

DNIALLVQ\*

GIKIQEGVVDYGARFYFYTSKTTVASLINTLNDLNETLVTMPLGYVTHGLNLEEAARYMRS LKVPATVSVSSPD.

SFKWDLTAFGLVAEWFLAYILFTRFFYVLGLAAIMQLFFSYFAVHFISNSWLMWLIINLVQMAPISAMVRMYI

AISMWALIISVTSNYSGVVTTVMFLARGIVFMCVEYCPITFITGNTLQCIMLVYCF LGYFCTCYFGLFCLLNRYFR  
TAAKLMVVIPDYNTYKNTCDGTTFTYASALWEIQVVDADSKIVQLSEISMDNSPNLAWPLIVTALRANS AV  
TAAKLMVVIPDYNTYKNTCDGTTFTYASALWEIQVVDADSKIVQLSEISMDNSPNLAWPLIVTALRANS AV

HSLAEYHNESGLKTILRKGGR TIAFGGCVFSYVGCHNK CAYWVPRASANIGCNHTGVVGE GSEGLNDNLLEILC

KYPQVNGLTSIKWADNNCYLATALTLQQIELKFNPPALQDAYYRARAGEAANFCALILAYCNKTVGELGDVR  
STKPVETSNSFDVLKSEDAQGMDNLACEDLKPVSEEVVENPTIQKDVLECNVKTTEVVGDIIILKPANNSLKITEE

HSLAEYHNESGLKILRKGGRITAFGGCVFSYVGCHNKCAYWVPRASANIGCNHTGVVGESEGLNDNLLEILC

IPSTQYEGTEDDYQGKPLEFGATSAALQPEEEQEEDWLDDDSQQTVGQQDGSEDNQTITTIQTIVEVQPQLI  
DNQTITTIQTIVEVQPQLEMELTPVVQTIEVNSFSGYLKLTDNVYIKNADIVEEAKKVKPTVVVNAANVYLKHG  
VHHMELPTGVHAGTDLEGNFYGPFVDRQTAQAAGDITITVNVLAWLYAAVINGDRWFLNRFTTTLNDFN

ARAGKASCTLSEQLDFIDTKRGVYCCREHEHEIAWYTERSEKSYELQTPFEIKLAKKFDTFNGECPNFVPLNSII

IFFASFYYVWKSIVHVV DGCNSSTCMICYKRN RATRVECTTIVNGVRRSFYVYANGGKGFCKLHNWNCVN  
IFFASFYYVWKSIVHVV DGCNSSTCMICYKRN RATRVECTTIVNGVRRSFYVYANGGKGFCKLHNWNCVN  
STFISDEVARDLSLQFKRPINPTDQSSYIVDSVTVKNGSIHLYFDKAGQKTYERHSLSHFVNLDNLRANNTKGS

ARAGKASCTLSEQLDFIDTKRGVYCCREHEHEIAWYTERSEKSYELQTPFEIKLAKKFDTFNGECPNFVPLNSII  
INLVRDLPQGFSALEPLVDLPIGINITRFQTLALHRSYLTPGDSSSGWTAGAAAYVGYLQPRTFLLKYNENGTI  
DNIALLVQ\*

DNQTTTIQTIVEVQPQLEMELTPVVQTIEVNSFSGYLKLTDNVYIKNADIVEEAKKVKPTVVVNAANVYLKHG

DNIALLVQ\*

IVTRDIASDTTCFANKHADFDTWFSQRGGSYTNDKACPLIAAVITREVGFFVPGLPGTILRTTNGDFLHFLPRVI

rst AUG position is the same as a known sgmRNA.

LPINVIVFDGKSKCEESSAKSASVYYSQLMCQPILLLDQALVSDVGDSAEVAVKMFDAYVNTFSSTFNVPMEK

FFASFYYVWKSYPVHVDGCNSSTCMMCYKRNRRATRVECTTIVNGVRRSFYVYANGGKGFCKLHNWNCVNC

RTILGSALLEDEFTPFDVVRQCSGVTFQSAVKRTIKGTHHWLLLILTSLLVLVQSTQWSLFFFLYENAFLPFAM

QKEKVNINIVGDFKLNEEIAIILASFSASTSAFVETVKGLDYKAFKQIVESCNGFKVTKGKAKKGAWNIGEQSIL

VGHTDLMAAYVDNSSLTIKKPNELSRVLGLKTLATHGLAAVNSVPWDTIANYAKPFLNKVVSTTTNIVTRCLN

EMELTPVVQTIEVNSFSGYLKLTDNVYIKNADIVEEAKKVKPTVVVNAANVYLKHGGGVAGALNKATNNAMC  
EMELTPVVQTIEVNSFSGYLKLTDNVYIKNADIVEEAKKVKPTVVVNAANVYLKHGGGVAGALNKATNNAMC

LLKYNENGTITDAVDCALDPLSETKCTLKSFTVEKGIYQTSNFRVQPTESIVRFPNITNLCPFGEVFNATRFASVY,

QKEKVNINIVGDFKLNEEIAIILASFSASTSAFVETVKGLDYKAFKQIVESCNGFKVTKGKAKKGAWNIGEQSIL

ITDAVDCALDPLSETKCTLKSFTVEKGIYQTSNFRVQPTESIVRFPNITNLCPFGEVFNATRFASVYAWNRKRIS



FSAVGNICYTPSKLIEYTD FATSACVLAAECTIFKDASGKPVPCYD TNVLEGSVAYESLRPDTRYV LMDGSI IQF

AVTAYNGYLTSSSKTPEEHFIETISLAGSYKDWSYSGQSTQLGIEFLKRGDKSVYYTSNPTTFHLDGEVITFDNLK

FFASFYYVWKSYPVHVVDGCNSSTCMMCYKRN RATRVECTIVNGVRRSFYVYANGGKGFCKLHNWNCVNC

!LTLGVYDYLVSTQEF RYMNSQGLLPPKNSIDAFKLN ILLGVGGKPCIKVATVQSKMSDVKCTSVVLLSVLQQI  
KLQNNELSPVALRQM SCAAGTTQTACTDDNALAYYNTTKGGRFVLALLSDLQDLKWARFPKSDGTGTIYTEL  
KLQNNELSPVALRQM SCAAGTTQTACTDDNALAYYNTTKGGRFVLALLSDLQDLKWARFPKSDGTGTIYTEL

QKEKVNINIVGDFKLN EEAIIILASFSASTSAFVETVKGLDYKAFKQIVESCGNFKVTKGKAKKGAWNIGE QKSIL

ETMSYLFQHANLDSCKRVLNVVCKTCGQQQTTLKGVEAVMYMGTLSEYQFKKGVQIPCTCGKQATKYLVQI  
VGHDLMAAYVDNSSLTIKKPNELSRVLGLKTLATHGLAAVNSVPWDTIANYAKPFLNKVVSTTTNIVTRCLN

QKEKVNINIVGDFKLNEEIAIILASFSASTSAFVETVKGLDYKAFKQIVESCNGFKVTKGKAKKGAWNIGEQSIL

EMELTPVVQTIEVNSFSGYLKLTDNVYIKNADIVEEAKKVKPTVVVNAANVYLKHGGGVAGALNKATNNAMC  
GGVAGALNKATNNAMQVESDDYIATNGPLKVGGSVLSGHNLAHCLHVVGPNVNGEDIQLLSAYENFI  
LVAMKYNYEPLTQDHVDILGPLSAQTGIAVLDMCASLKELLQNGMNGRTILGSALLEDEFTPFDVVRQCSGV

KTIQPRVEKKKLDGFMGRIRSVYPVAVSPNECNQMCLSTLMKCDHCGETSWQTGDFVKATCEFCGTENLTKEI

CDTFCAGSTFISDEVARDLSLQFKRPINPTDQSSYIVDSVTVKNGSIHLYFDKAGQKTYERHSLSHFVNLDNLRA  
CDTFCAGSTFISDEVARDLSLQFKRPINPTDQSSYIVDSVTVKNGSIHLYFDKAGQKTYERHSLSHFVNLDNLRA  
LPINVIVFDGKSKCEESSAKSASVYYSQLMCQPILLDQALVSDVGDSAEVAVKMFDAYVNTFSSTFNVPMEK

KTIQPRVEKKKLDGFMGRIRSVYPVASPNECNQMCLSTLMKCDHCGETSWQTGDFVKATCEFCGTENLTKEI  
ITDAVDCALDPLSETKCTLKSFTVEKGIYQTSNFRVQPTESIVRFPNITNLCPFGEVFNATRFASVYAWNRKRIS

GGVAGALNKATNNAMQVESDDYIATNGPLKVGGSVLSGHNLAHCLHVVGPVNVKGEDIQLLKSAYENFI

FSAVGNICYTPSKLIEYDFATSACVLAAECTIFKDASGKVPYCYDTNVLEGSVAYESLRPDTRYVLMDGSIQF

LKTLVATAEAEAKNVSLDNVLSTFISAARQGFVDSVETKDVVECLKLSHQSDIEVTGDSCNNYMLTYNKVEI

∩DTFCAGSTFISDEVARDLSLQFKRPINPTDQSSYIVDSVTVKNGSIHLYFDKAGQKTYERHSLSHFVNLDNLRAI

1GIIAMSAFAMMFVKHKHAFLLCLFLLPSLATVAYFNMVYMPASWVMRIMTWLDMVDTSLSGFKLKDCVMY

SPLYAFASEAARVVRSIFSRTLETAQNSVRVLQKAAITILDGISQYSLRLIDAMMFTSDLATNNLVVMAYITGG\

IRVCTNYMPYFFTLQLCTFTRSTNSRIKASMPPTIAKNTVKSVMKFCLEASFNYLKSPNFSKLINIIWFLLSVC

∩VESDDYIATNGPLKVGGSVLSGHNLAKHCLHVVGPNVKNKGEDIQLLKSAYENFNQHEVLLAPLLSAGIFGAI

∩VESDDYIATNGPLKVGGSVLSGHNLAKHCLHVVGPNVKNKGEDIQLLKSAYENFNQHEVLLAPLLSAGIFGAI

AWNRKRISNCVADYSVLYNSASFSTFKCYGVSPTKLNLDLCFTNVYADSFVIRGDEVQRQIAPGQTGKIADYNYKI

SPLYAFASEAARVVRSIFSRTLETAQNSVRVLQKAAITILDGISQYSLRLIDAMMFTSDLATNNLVVMAYITGG\

∩CVADYSVLYNSASFSTFKCYGVSPTKLNLDLCFTNVYADSFVIRGDEVQRQIAPGQTGKIADYNYKLPDDFTGCV

PNTYLEGSRVVVTTFDSEYCRHGTCERSEAGVCVSTSGRWVLNNDYYRSLPGVFCGVDAVNLLTNMFTPLIQ

CTLLSLREVRTIKVFTTVDNINLHTQVVDMSTYGGQFGPTYLDGADVTKIKPHNSHEGKTFYVLPNDLRLV

CDTFCAGSTFISDEVARDLSLQFKRPINPTDQSSYIVDSVTVKNGSIHLYFDKAGQKTYERHSLSHFVNLDNLRAI

.RVESSKLWAQCVQLHNDILLAKDTTEAFEKMSVLLSVLLSMQGAVDINKLCEEMLDNRATLQAIASEFSSLP  
.EPPCRFVTDTPKGPKVKYLYFIKGLNNLNRGMVLGSLAATVRLQAGNATEVPANSTVLSFCFAVDAAKAYKI  
.EPPCRFVTDTPKGPKVKYLYFIKGLNNLNRGMVLGSLAATVRLQAGNATEVPANSTVLSFCFAVDAAKAYKI

SPLYAFASEAARVVRSIFSRTLETAQNSVRVLQKAAITILDGISQYSLRLIDAMMFTSDLATNNLVVMAYITGGV

QESPFVMMMSAPPAQYELKHGTFTCASEYTGNYQCGHYKHITSKETLYCIDGALLTKSSEYKGPITDVFYKENSY  
IRVCTNYMPYFFTLQLCTFTRSTNSRIKASMPPTIAKNTVKSVMKFCLEASFNYLKSPNFSKLINIIWFLLSVC

SPLYAFASEAARVVRSIFSRTLETAQNSVRVLQKAAITLDGISQYSLRLIDAMMFTSDLATNNLVVMAYITGGV

QVESDDYIATNGPLKVGGSCVLSGHNLAHCLHVVGPNVKNKGEDIQLLKSAYENFNQHEVLLAPLLSAGIFGAI  
NQHEVLLAPLLSAGIFGADPIHSLRVCVDTVRTNVYLAVFDKNLYDKLVSSFLEMKSEKQVEQKIAEIPKEEVKPI  
TFQSAVKRTIKGTHHWLLLILTSLLVLVQSTQWSLFFFLYENAFLPFAMGIIAMSAFAMMFVKHKAFLCLFL

GATTCGYLPQNAVVKIYCPACHNSEVGPESHSLAEYHNESGLKTILRKGGRRTIAFGGCVFSYVGCHNKAYWVF

NNTKGSLPINVIVFDGKSKCEESSAKSASVYYSQLMCQPILLDQALVSDVGDSA EVAVKMF DAYVNTFSSTFI  
NNTKGSLPINVIVFDGKSKCEESSAKSASVYYSQLMCQPILLDQALVSDVGDSA EVAVKMF DAYVNTFSSTFI  
LKTLVATAEAEELAKNVSLDNVLSTFISAARQGFVDSVETKDVVECLKLSHQSDIEVTGDSCNNYMLTYNKVEI

GATTCGYLPQNAVVKIYCPACHNSEVGPESHSLAEYHNESGLKTILRKGGRRTIAFGGCVFSYVGCHNKAYWVF  
VCVADYSVLYNSASFSTFKCYGVSPTKLNLCFTNVYADSFVIRGDEVQRQIAPGQTGKIADYNYKLPDDFTGCV

VQHEVLLAPLLSAGIFGADPIHSLRVCVDTVRTNVYLAVFDKNLYDKLVSSFLEMKSEKQVEQKIAEIPKEEVKPI

PNTYLEGSRVVTTFDSEYCRHGTCERSEAGVCVSTSGRWVLNNDYYRSLPGVFCGVDAVNLLTNMFTPLIQ

NMTPRDLGACIDCSARHINAQVAKSHNIALIWNVVKDFMSLSEQLRKQIRSAAKKNNLPFKLTCATTRQVVNV'

NNTKGSLPINVIVFDGKSKCEESSAKSASVYYSQLMCQPILLDDQALVSDVGDSAEVAVKMFDAYVNTFSSTFM

(ASAVVLLILMTARTVYDDGARRVWTLMNVLTLVYKVVYGNALDQAISMWALIISVTSNYSGVVTTVMFLAR)

/VQLTSQWLTNIFGTVYEKLPVLDWLEEKFKEGVEFLRDGWEIVKFISTCACEIVGGQIVTCAKEIKESVQTFFI

LGSLIYSTAALGVLMSNLGMPSTYCTGYREGYLNSTNVTIATYCTGSIPCSVCLSGLDSLDTYPSLETIQITISSFKW

DPIHSLRVCVDTVRTNVYLAVFDKNLYDKLVSSFLEMKSEKQVEQKIAEIPKEEVKPFITESKPSVEQRKQDDKK  
DPIHSLRVCVDTVRTNVYLAVFDKNLYDKLVSSFLEMKSEKQVEQKIAEIPKEEVKPFITESKPSVEQRKQDDKK

LPDDFTGCVIAWNSNNLDSKVGGNYNYLYRLFRKSNLKPFERDISTEIQAGSTPCNGVEGFNCYFPLQSYGFC

/VQLTSQWLTNIFGTVYEKLPVLDWLEEKFKEGVEFLRDGWEIVKFISTCACEIVGGQIVTCAKEIKESVQTFFI

IAWNSNNLDSKVGGNYNYLYRLFRKSNLKPFERDISTEIQAGSTPCNGVEGFNCYFPLQSYGFQPTNGVGYC



PIGALDISASIVAGGIVAIIVTCLAYYFMRFRRAFGEYSHVAFNTLLFLMSFTVLCLTPVYSFLPGVYSVIYLYLT!

EAFEYYHTTDPNFLGRYMSALNHTKKWKYPQVNGLTSLKWADNNCYLATALLTLQQIELKFNPPALQDAYYR/

NNTKGSPLINVIVFDGKSKCEESSAKSASVYYSQLMCQPILLDQALVSDVGDSA EVAVKMF DAYVNTFSSTF!

SYAAFATAQEAYEQAVANGDSEVVLKLLKSLNVAKSEFDRDAAMQRKLEKMADQAMTQMYKQARSEDK  
DYLASGGQPITNCVKMLCTHTGTGQAITVTPEANMDQESFGGASCCLYCRCHIDHPNPKGFCDLKGKYVQIP  
DYLASGGQPITNCVKMLCTHTGTGQAITVTPEANMDQESFGGASCCLYCRCHIDHPNPKGFCDLKGKYVQIP

/VQLTSQWL TNIFGTVYEKLPVLDWLEEKFKEGVEFLRDGWEIVKFISTCACEIVGGQIVTCAKEIKESVQTF!

TTTIKPVTYKLDGVVCTEIDPKLDNYYKKDNSYFTEQPIDLVPNQYPNASFDNFKFVCDNIKFADDLNQLTGYI  
LGSLIYSTAALGVLMSNLGMPSTYCTGYREGYLNSTNVTIATYCTGSIPCSVCLSGLDSDTYPSELETIQITISSFKW

/VQLTSQWLTNIFGTVYEKLPVLDWLEEKFKEGVEFLRDGWEIVKFIKSTCACEIVGGQIVTCAKEIKESVQTFFI

DPIHSLRVCVDTVRTNVYLAVFDKNLYDKLVSSFLEMKSEKQVEQKIAEIPKEEVKPFITESKPSVEQRKQDDKK  
FITESKPSVEQRKQDDKKIKACVEEVTTTTLEETKFLTENLLLYIDINGNLHPDSATLVSDIDITFLKKDAPYIVGDVA  
.LPSLATVAYFNMVYMPASWVMRIMTWLDMVDTSLSGFKLKDCVMYASAVLLILMTARTVYDDGARRVW

PRASANIGCNHTGVVGESEGLNDNLLEILQKEKVNINIVGDFKLNEEIAIILASFSASTSAFVETVKGLDYKAFKI

VVPMEKLTAVATAEAEELAKNVSLDNVLSFISAARQGFVSDVETKDVVECLKLSHQSDIEVTGDSCNNYML  
VVPMEKLTAVATAEAEELAKNVSLDNVLSFISAARQGFVSDVETKDVVECLKLSHQSDIEVTGDSCNNYML  
VMTPRDLGACIDCSARHINAQVAKSHNIALIWNVVKDFMSLSEQLRKQIRSAKKNLFPKLTATTRQVVNV'

PRASANIGCNHTGVVGESEGLNDNLEILQKEKVNINIVGDFKLNEEIAIILASFSASTSAFVETVKGLDYKAFK  
IAWNSNNLDSKVGGNYNYLYRLFRKSNLKPFERDISTEIYQAGSTPCNGVEGFNCYFPLQSYGFQPTNGVGYC

FITESKPSVEQRKQDDKKIKACVEEVTTTLEETKFLTENLLLYIDINGNLHPDSATLVSDIDITFLKKDAPYIVGDVA

PIGALDISASIVAGGIVAIVVTCLAYYFMRFRRAFGEYSHVAFNTLLFLMSFTVLCLTPVYSFLPGVYSVIYLYLTI

VTTKIALKGGKIVNNWLKQLIKVTLVFLFVAAIFYLITPVHVMSKHTDFSSEIIGYKAIDGGVTRDIASDTDCFANI

∩VPMKELKTLVATAEAEELAKNVSLDNVLSTFISAARQGFVDSVETKDVVECLKLSHQSDIEVTGDSCNNYML

GIVFMCVEYCPIFFITGNTLQCIMLVYCFGLGYFCTCYFGLFCLLNRYFRLTLGVYDYLSTQEFRYMNSQGLLPPH

<LVNKFLALCADSIIIGGAKLKALNLGETFVTHSKGLYRKC VKSREETGLLMPLKAPKEIIFLEGETLPTEVLTEEVV

/DLTAFGLVAEWFLAYILFTRFFYVLGLAAIMQLFFSYFAVHFISNSWLMWLIINLVQMAPISAMVRMYIFFASI

IKACVEEVTTTLEETKFLTENLLLYIDINGNLHPDSATLVSDIDITFLKKDAPYIVGDVVQEGVLTAVVIPTKKAGC  
IKACVEEVTTTLEETKFLTENLLLYIDINGNLHPDSATLVSDIDITFLKKDAPYIVGDVVQEGVLTAVVIPTKKAGC

∩PTNGVGYPYRVVLSFELLHAPATVCGPKKSTNLVKNKCVNFNFNGLTGTGVLTESNKKFLPFQQFGRDIA

<LVNKFLALCADSIIIGGAKLKALNLGETFVTHSKGLYRKC VKSREETGLLMPLKAPKEIIFLEGETLPTEVLTEEVV

∩PYRVVLSFELLHAPATVCGPKKSTNLVKNKCVNFNFNGLTGTGVLTESNKKFLPFQQFGRDIADTTDAVRDI

FYLTNDVSFLAHIQWMVMFTPLVPFWITIAIYIICISTKHFYWFFSNYLKRRVVFNGVSFSTFEEAALCTFLLNKEI

ARAGEAANFCALILAYCNKTVGELGDVRETMSYLFQHANLDSCKRVLNVVCKTCGQQQTTLKGVEAVMYMC

IVPMEKLTLVATAEAEELAKNVSLDNVLSTFISAARQGFVDSVETKDVVECLKLSHQSDIEVTGDSCNNYML

IRAKVTSAMQTMFTMLRKLDNDALNNIINNARDGCVPLNIIPLTAAKLMVVIPDYNTYKNTCDGTTFTYAS,

TTCANDPVGFTLKNTVCTVCGMWKGYGCSCDQLREPMLQSADAQSFLNGFAV\*

TTCANDPVGFTLKNTVCTVCGMWKGYGCSCDQLREPMLQSADAQSFLNGFAV\*

GLVNFALCADSIIIGGAKLKALNLGETFVTHSKGLYRKC VKSREETGLLMPLKAPKEIIFLEGETLPTEVLTEEVV

KKPASRELKVTFFPDNLNGDVVAIDYKHYTPSFKKGAKLLHKPIVWHVNNATNKATYKPNTWCIRCLWSTKPVE  
/DLTAFGLVAEWFLAYILFTRFFYVLGLAAIMQLFFSYFAVHFISNSWLMWLIINLVQMAPISAMVRMYIFFASI

<LVNKFLALCADSIIIGGAKLKALNLGETFVTHSKGLYRKC VKSREETGLLMPLKAPKEIIFLEGETLPTEVLTEEVV

IKACVEEVTTTLEETKFLTENLLLYIDINGNLHPDSATLVSDIDITFLKKDAPYIVGDVVQEGVLTAVVIPTKKAGC  
/QEGVLTAVVIPTKKAGGTTEMLAKALRKVPTDNYITTPGQGLNGYTVEEAKTVLKKCKSAFYILPSIISNEKQE  
/TLMNVLT LVYKVVYGNALDQAISMWALIISVTSNYSGVVTTVMFLARGIVFMCVEYCPIFFITGNTLQCIMLV

QIVESC GNFKVTKGKAKKGAWNIGE QKSILSPLYAFASEAARVRSIFSRTLETAQNSVRVLQKAAITILDGISQY

.TYNKVENMTPRDLGACIDCSARHINAQVAKSHNIALIWNVKDFMSLSEQLRKQIRSAAKNNLPFKLTCATTF  
.TYNKVENMTPRDLGACIDCSARHINAQVAKSHNIALIWNVKDFMSLSEQLRKQIRSAAKNNLPFKLTCATTF  
VTTKIALKGGKIVNNWLKQLIKVTLVFLFVAAIFYLITPVHVMSKHTDFSEIIGYKAIDGGVTRDIASDTDCFANI

QIVESCGNFKVTKGKAKKGAWNIGEQKSILSPLYAFASEAARVVRSIFSRTLETAQNSVRVLQKAAITILDGISQY  
QPYRVVLSFELLHAPATVCGPKKSTNLVKNKCVNFNFNGLTGTGVLTESNKKFLPFQQFGRDIADTTDAVRDI

/QEGVLTAVVIPTKKAGGTTEMLAKALRKVPTDNYITTYPGQGLNGYTVEEAKTVLKKCKSAFYILPSIISNEKQE

FYLTNDVSFLAHIQWMVMFTPLVPFWITIAYIICISTKHFYWFFSNYLKRRVVFNGVSFSTFEEAALCTFLLNKEI

<HADFDTWFSQRGGSYTNDKACPLIAAVITREVGFFVPLPGTILRTTNGDFLHFLPRVFSAVGNICYTPSKLIE

TYNKVENMTPRDLGACIDCSARHINAQVAKSHNIALIWNVVKDFMSLSEQLRKQIRSAAKKNNLPFKLTCATTR

<NSIDAFKLNILLGVGGKPCIKVATVQSKMSDVKCTSVVLLSVLQQLRVESSSKLWAQCVQLHNDILLAKDTTI

'LKTGDLQPLEQPTSEAVEAPLVGTPVCINGLMLEIKDTEKYCALAPNMMVTNNTFTLKGGAPTQVTFGDDT

FYYVWKSIVHVVDGCNSSTCMMCYKRNRRATRVECTIVNGVRRSFYVYANGGKGFCKLHNWNCVNCDTFC

¡TTEMLAKALRKVPTDNYITTPGQGLNGYTVVEAKTVLKKCKSAFYILPSIISNEKQEILGTVSWNLREMLAHA!

¡TTEMLAKALRKVPTDNYITTPGQGLNGYTVVEAKTVLKKCKSAFYILPSIISNEKQEILGTVSWNLREMLAHA!

.DTTDAVRDPQTLEILDITPCSFGGVSVITPGTNTSNQVAVLYQDVNCTEVPVAIHADQLTPTWRVYSTGSNVF

'LKTGDLQPLEQPTSEAVEAPLVGTPVCINGLMLEIKDTEKYCALAPNMMVTNNTFTLKGGAPTQVTFGDDT

PQTLLEILDITPCSFGGVSVITPGTNTSNQVAVLYQDVNCTEVPVAIHADQLTPTWRVYSTGSNVFQTRAGCLIC



MYLKLRSVDVLLPLTQYNRYLALYNKYKYFSGAMDTSYREAAACCHLAKALNDFSNSGSDVLYQPPQTSITSAVL

3TLYEQFKKGVQIPCTCGKQATKYLQVQESPFVMMMSAPPAQYELKHGTFTCASEYTGNYQCGHYKHITSKET

TYNKVENMTPRDLGACIDCSARHINAQVAKSHNIALIWNVKDFMSLSEQLRKQIRSAAKKNNLPFKLTCATTR

ALWEIQVVDADSKIVQLSEISMDNSPNLAWPLIVTALRANSVAVKLQNNELSPVALRQMCAAGTTQTACTI

'LKTGDLQPLEQPTSEAVEAPLVGTPVCINGLMLEIKDTEKYCALAPNMMVTNNTFTLKGGAFTKVTFGDDT

TSNSFDVLKSEDAQGMDNLACEDLKPVSEEVVENPTIQKDVLECNVKTTEVVGDIILKPANNSLKITEEVGHTI  
FYYVWKSYPVHVVDGCNSSTCMMCYKRNRRATRVECTIVNGVRRSFYVYANGGKGFCKLHNWNCVNCDFC

LKTGDLQPLEQPTSEAVEAPLVGTPVCINGLMLEIKDTEKYCALAPNMMVTNNTFTLKGGAFTKVTFGDDT

ITTEMLAKALRKVPTDNYITTPGQGLNGYTVEEAKTVLKKCKSAFYILPSIISNEKQEILGTVSWNLREMLAHA  
ILGTVSWNLREMLAHAEETRKLMPVCVETKAIVSTIQRKYKGIKIQEGVVDYGARFYFYSKTTVASLINTLND  
YFLGYFCTCYFGLFCLLNRYFRLTLGVYDYLSTQEFYMNNSQGLLPPKNSIDAFKLNKLLGVGGKPCIKVAT

SLRLIDAMMFTSDLATNNLVVMAYITGGVVQLTSQWLTNIFGTVYEKLPVLDWLEEKFKEGVEFLRDGWE

RQVNVVTTKIALKGGKIVNNWLKQLIKVTLVFLVAAIFYLITPVHVMKHTDFSSIEIGYKAIDGGVTRDIAS  
RQVNVVTTKIALKGGKIVNNWLKQLIKVTLVFLVAAIFYLITPVHVMKHTDFSSIEIGYKAIDGGVTRDIAS  
KHADFDTWFSQRGGSYTNDKACPLIAAVITREVGFFVPLPGTILRTTNGDFLHFLPRVFSAVGNICYTPSKLIE

/SLRLIDAMMFTSDLATNNLVVMAYITGGVVQLTSQWLTNIFGTVYEKLPVLDWLEEKFKEGVEFLRDGWE  
PQLEILDITPCSFGGVSVITPGTNTSNQVAVLYQDVNCTEVPVAIHADQLTPTWRVYSTGSNVFQTRAGCLIC

ILGTVSWNLREMLAHAEETRKLMPVCVETKAIVSTIQRKYKGIKIQEGVVDYGARFYFYSKTTVASLINTLND

MYLKLRSVLLPLTQYNRYLALYNKYKYFSGAMDTSYREAACCHLAKALNDFSNSGSDVLYQPPQTSITSAVL

YDFATSACVLAAECTIFKDASGKVPYCYDTNVLEGSVAYESLRPDTRYVLMDGSIQFPNTYLEGSVRVVTTF

QVVNVVTTKIALKGGKIVNNWLKQLIKVTLVFLFVAAIFYLITPVHVMSKHTDFSSEIIGYKAIDGGVTRDIASTI

EAFEKMOVSVLLSMQGAVDINKLCEEMLDNRATLQAIASEFSSLPYAAFATAQEAYEQAVANGDSEVVLK

VIEVQGYKSVNITFELDERIDKVLNEKCSAYTVELGTEVNEFACVVADAVIKTLQPVSELLTPLGIDLDEWSMAT

AGSTFISDEVARDLSLQFKRPINPTDQSSYIVDSVTVKNGSIHLYFDKAGQKTYERHSLSHFVNLDNLRANNTK

EETRKLMPVCVETKAIVSTIQRKYKGIKIQEGVVDYGARFYFYTSKTTVASLINTLNDLNETLVTMPLGYVTHGL

EETRKLMPVCVETKAIVSTIQRKYKGIKIQEGVVDYGARFYFYTSKTTVASLINTLNDLNETLVTMPLGYVTHGL

QTRAGCLIGAEHVNNSECDIPIGAGICASYQTQTNSPRRARSVASQSIIAYTMSLGAENSVAYSNNNSIAIPTN

VIEVQGYKSVNITFELDERIDKVLNEKCSAYTVELGTEVNEFACVVADAVIKTLQPVSELLTPLGIDLDEWSMAT

AEHVNNSECDIPIGAGICASYQTQTNSPRRARSVASQSIIAYTMSLGAENSVAYSNNNSIAIPTNFTISVTTEILP

.QSGFRKMAFPSGKVEGCMVQVTCGTTTTLNGLWLDDVVYCPRHVICTSEDMLNPNYEDLLIRKSNHNFLVQ/

'LYCIDGALLTKSSEYKGPITDVFYKENSYTTTIKPVTYKLDGVVCTEIDPKLDNYYKKDNSYFTEQPIDLVPNQPY

{QVVNVVTTKIALKGGKIVNNWLKQLIKVTLVFLFVAAIFYLITPVHVMSKHTDFSSEIIGYKAIDGGVTRDIASIT

DNALAYYNTTKGGRFVLALLSDLQDLKWARFPKSDGTGTIYTELEPPCRFVTDTPKGPKVKYLYFIKGLNNLNI

'VIEVQGYKSVNITFELDERIDKVLNEKCSAYTVELGTEVNEFACVVADAVIKTLQPVSELLTPLGIDLDEWSMAT

DLMAAYVDNSSLTIKKPNELSRVLGLKTLATHGLAAVNSVPWDTIANYAKPFLNKVVSTTTNIVTRCLNRVCTM  
AGSTFISDEVARDLSLQFKRPINPTDQSSYIVDSVTVKNGSIHLYFDKAGQKTYERHSLSHFVNLDNLRANNTK

VIEVQGYKSVNITFELDERIDKVLNEKCSAYTVELGTEVNEFACVVADAVIKTLQPVSELLTPLGIDLDEWSMAT

EETRKLMPVCVETKAIVSTIQRKYKGIKIQEGVVDYGARFYFYTSKTTVASLINTLNDLNETLVTMPLGYVTHGL  
LNETLVTMPLGYVTHGLNLEEAARYMRSKVPATVSVSSPDAVTAYNGYLTSSSKTPEEHFIETISLAGSYKDW  
/QSKMSDVKCTSVLLSVLQQLRVESSSKLWAQCVQLHNDILLAKDTTEAFEKMSVLLSVLLSMQGAVDINKL

IVKFISTCACEIVGGQIVTCAKEIKESVQTFKLVNKFLALCADSIIIGGAKLKALNLGETFVTHSKGLYRKCVKSRE

DTCFANKHADFDTWFSQRGGSYTNDKACPLIAAVITREVGFFVVPGLPGTILRTTNGDFLHFLPRVFSAVGNIC)  
DTCFANKHADFDTWFSQRGGSYTNDKACPLIAAVITREVGFFVVPGLPGTILRTTNGDFLHFLPRVFSAVGNIC)  
YDFATSACVLAAECTIFKDASGKVPYCYDTNVLEGSVAYESLRPDTRYVLMGDSIIQFPNTYLEGSVRVVTTF

IVKFISTCACEIVGGQIVTCAKEIKESVQTFKLVNKFLALCADSIIIGGAKLKALNLGETFVTHSKGLYRKCVKSRE  
;AEHVNNSYECDIPIGAGICASYQTQTNSPRRARSVASQSIIAYTMSLGAENSVAYSNNNSIAIPTNFTISVTTEILP

LNETLVTMPLGYVTHGLNLEEAARYMRSLKVPATVSVSSPDAVTAYNGYLTSSSKTPEEHFIETISLAGSYKDW

.QSGFRKMAFPSGKVEGCMVQVTCGTTTLNGLWLDDVVYCPRHVICTSEDMLNPNYEDLLIRKSNHNFLVQ/

FDSEYCRHGT CERSEAGVCVSTSGRWVLNNDYYRSLPGVFCGVDAVNLLTNMFTPLIQPIGALDISASIVAGGI

DTCFANKHADFDTWFSQRGGSYTNDKACPLIAAVITREVGFFVPLPGTILRTTNGDFLHFLPRVFSAVGNICY

IKLKKSLNVAKSEFDRDAAMQRKLEKMADQAMTQMYKQARSEDKRAKVTSAMQTMLFTMLRKLNDALN

FYYLFDESGEFKLASHMYCSFYPPDEDEEEGDCEEEEFEPSTQYEYGTEDDYQGKPLEFGATSAALQPEEEQEEI

IGSLPINVIVFDGKSKCEESSAKSASVYYSQLMCQPILLLDQALVSDVGDSA EVAVKMF DAYVNTFSSTFNVPM

NLEEAARYMRS LKVPATVSVSSPDAVTAYNGYLTSSSKTPEEHFIETISLAGSYKDWSYSGQSTQLGIEFLKRGD  
NLEEAARYMRS LKVPATVSVSSPDAVTAYNGYLTSSSKTPEEHFIETISLAGSYKDWSYSGQSTQLGIEFLKRGD

FTISVTTEILPVSM TKTSVDCTMYICGDSTECSNLLLQYGSFCTQLNRALTGI AVEQDKNTQE VFAQVKQIYKTF

FYYLFDESGEFKLASHMYCSFYPPDEDEEEGDCEEEEFEPSTQYEYGTEDDYQGKPLEFGATSAALQPEEEQEEI

IVSM TKTSVDCTMYICGDSTECSNLLLQYGSFCTQLNRALTGI AVEQDKNTQE VFAQVKQIYKTFPIKDFGGFN



AGNVQLRVIGHSMQNCVLLKLVDTANPKTPKYKFVRIQPGQTFVSVLACYNGSPSGVYQCAMRPNFTIKGSFLI

PNASFDNFKFVCDNIKFADDLNQLTGYKKPASRELKVTFPDLNGDVVAIDYKHYPSTFKKGAKLLHKPIVWH'

DTCFANKHADFDTWFSQRGGSYTNDKACPLIAAVITREVGFFVPGLPGTILRTTNGDFLHFLPRVFSAVGNICY

RGMVLGSLAATVRLQAGNATEVPANSTVLSFCAFAVDAAKAYKDYLASGGQPITNCVKMLCTHTGTGQAIT\

TYLFDESGEFKLASHMYCSFYPPDEDEEEGDCEEEEFEPSTQYEYGTEDDYQGKPLEFGATSAALQPEEEQEEI

NYMPYFFTLQLCTFTRSTNSRIKASMPPTIAKNTVKSVMKFCLEASFNKSPNFSKLINIIWFLLSVCLGSLIY  
'GSLPINVIVFDGKSKCEESSAKSASVYYSQLMCQPILLDDQALVSDVGDSEVAVKMFDAYVNTFSSTFNVPM

YFLDESGEFKLASHMYCSFYPPDEDEEEGDCEEEEFEPSTQYEYGTEDDYQGKPLEFGATSAAALQPEEEQEEI

NLEEAARYMRSKVPATVSVSSPDAVTAYNGYLTSSSKTPEEHFIETISLAGSYKDWSYSGQSTQLGIEFLKRGD  
'SYSGQSTQLGIEFLKRGDKSVYYTSNPTTFHLDGEVITFDNLKTLTSLREVRTIKVFTTVDNINLHTQVVDMSM'  
.CEEMLDNRATLQAIASEFSSLPSYAAFATAQEAYEQAVANGDSEVVLLKLLKSLNVAKSEFDRDAAMQRKLE

ETGLLMPLKAPKEIIFLEGETLPTEVLTEEVVLKTGDLQPLEQPTSEAVEAPLVGTPVCINGLMLEIKDTEKYCA

YTPSKLIEYDFATSACVLAAECTIFKDASGKVPYCYDTNVLEGSVAYESLRPDTRYVLMDGSIQFPNTYLEGS'  
YTPSKLIEYDFATSACVLAAECTIFKDASGKVPYCYDTNVLEGSVAYESLRPDTRYVLMDGSIQFPNTYLEGS'  
=DSEYCRHGTCESEAGVCVSTSGRWVLLNDYYRSLPGVFCGVDAVNLLTNMFTPLIQPIGALDISASIVAGGI

ETGLLMPLKAPKEIIFLEGETLPTEVLTEEVVLKTGDLQPLEQPTSEAVEAPLVGTPVCINGLMLEIKDTEKYCA  
VSMTKTSVDCTMYICGDSTECSNLLLQYGSFCTQLNRALTGIAVEQDKNTQEVFAQVKQIYKTPPIKDFGGFN

SYSGQSTQLGIEFLKRGDKSVYYTSNPTTFHLDGEVITFDNLKTLSSLREVRTIKVFVVVDNINLHTQVVDMSM

AGNVQLRVIGHSMQNCVLKLVDTANPKTPKYKRVRIQPGQTFVSVLACYNGSPSGVYQCAMRPNFTIKGSFLI

IVAIIVTCLAYYFMRFRRAFGEYSHVVAFNTLLFLMSFTVLCLTPVYSFLPGVYSVIYLYLTFYLTNDVSLAHIQW

(TPSKLIEYTDFAVSACVLAECTIFKDASGKVPYCYDTNVLEGSVAYESLRPDTRYVLMGSIQFPNTYLEGS)

INIINNARDGCVPLNIPLTTAAKLMVVIPDYNTYKNTCDGTTFTYASALWEIQVVDADSKIVQLSEISMDNSF

DWLDDDSQQTVGQQDGSEDNQTITTIQTIVEVQPQLEMELTPVVQTIEVNSFSGYLKLTDNVYIKNADIVEEA

IEKLTLVATAEAEELAKNVSLDNVLSTFISAARQGFVDSVETKDVVECLKLSHQSDIEVTGDSCNNYMLTYNK'

)KSVYYTSNPTTFHLDGEVITFDNLKTLSSLREVRTIKVFTTVDNINLHTQVVDMSMTYGQQFGPTYLDGADVT

)KSVYYTSNPTTFHLDGEVITFDNLKTLSSLREVRTIKVFTTVDNINLHTQVVDMSMTYGQQFGPTYLDGADVT

'PIKDFGGFNFSQILPDPSKPSKRSFIEDLLFNKVTLADAGFIKQYGDCLGDIARDLICAQKFNGLTVLPPLLTDE

DWLDDDSQQTVGQQDGSEDNQTITTIQTIVEVQPQLEMELTPVVQTIEVNSFSGYLKLTDNVYIKNADIVEEA

JFSQILPDPSKPSKRSFIEDLLFNKVTLADAGFIKQYGDCLGDIARDLICAQKFNGLTVLPPLLTDEMIAQYTSAI

NGSCGSVGFNIDYDCVSFCYMHHMELPTGVHAGTDLEGNFYGPFVDRQTAQAAGTDTTITVNVLAWLYAA'

VNNATNKATYKPNTWCIRCLWSTKPVETSNSFDVLKSEDAQGMDNLACEDLKPVSEEVVENPTIQKDVLECA'

(TPSKLIEYTDFAVSACVLAECTIFKDASGKVPYCYDTNVLEGSVAYESLRPDTRYVLMDGSIQFPNTYLEGS)

VTPEANMDQESFGGASCCLYCRCHIDHPNPKGFCDLKGKYVQIPTTCANDPVGFTLKNTVCTVCGMWKGYC

DWLDDDSQQTVGQQDGSEDNQTITIQTIVEVQPQLEMELTPVVQTIEVNSFSGYLKLTDNVYIKNADIVEEA

'STAALGVLMNSNLGMPSYCTGYREGYLNSTNVTIATYCTGSIPCSVCLSGLDSDTYPSELETIQITISSFKWDLTAF  
IEKLTLVATAEAEELAKNVSLDNVLSTFISAARQGFVDSVETKDVVECLKLSHQSDIEVTGDSCNNYMLTYNK'

DWLDDDSQQTVGQQDGSEDNQTITTIQITIVEVQPQLEMELTPVVQTIEVNSFSGYLKLTDNVYIKNADIVEEA

)KSVYYTSNPTTFHLDGEVITFDNLKTLSSLREVRTIKVFTTVDNINLHTQVVDMSMTYGQQFGPTYLDGADVT  
TYGQQFGPTYLDGADVTKIKPHNSHEGKTFYVLPNDDTLRVEAFEYHHTDPSFLGRYMSALNHTKKWKYPQ  
KMADQAMTQMYQARSEDKRAKVTSAMQTMLFTMLRKLDNDALNNIINNARDGCVPLNIPLTTAAKLM)

LAPNMMVTNNTFTLKGGAPTKVTFGDDTVIEVQGYKSVNITFELDERIDKVLNEKCSAYTVELGTEVNEFACV

VRVVTTFDSEYCRHGTCERSEAGVCVSTSGRWVLNNDYYRSLPGVFCGVDAVNLLTNMFTPLIQIPIGALDISA  
VRVVTTFDSEYCRHGTCERSEAGVCVSTSGRWVLNNDYYRSLPGVFCGVDAVNLLTNMFTPLIQIPIGALDISA  
|VAIVTCLAYYFMRFRRAFGEYSHVVAFNLLFLMSFTVLCLTPVYSFLPGVYSVIYLYLTFYLTNDVSFLAHIQV

LAPNMMVTNNTFTLKGGA<sup>P</sup>TKVTFGDDTVIEVQGYKSVNITFELDERIDKVLNEKCSAYTVELGTEVNEFACV  
JFSQILPDPSKPSKRSFIEDLLFNKVTLADAGFIKQYGDCLGDIAARDLICAQKFNGLTVLPPLLTDEMIAQYTSAI

TYGQQFGPTYLDGADVTKIKPHNSHEGKTFYVLPNDDTLRVEAFEYHHTDPSFLGRYMSALNHTKKWKYPQ

NGSCGSVGFNIDYDCVSFCYMHMELPTGVHAGTDLEGNFYGPFVDRQTAQAAGTDTTITVNVLAWLYAA'

VMVMFTPLVPFWITIAYIICISTKHFYWFFSNYLKRRVVFNGVSFSTFEEAALCTFLLNKEMYLKLRSDVLLPLTQ

VRVTTFDSEYCRHGTCERSEAGVCVSTSGRWVLNNDYYRSLPGVFCGVDAVNLLTNMFTPLIQPIGALDISA

PNLAWPLIVTALRANSAVKLQNNELSPVALRQMSCAAGTTQACTDDNALAYYNTTKGGRFVLALLSDLQDL

KKVKPTVVVNAANVYLKHGGGVAGALNKATNNAMQVESDDYIATNGPLKVGGSVLSGHNLAKHCLHVVC

VENMTPRDLGACIDCSARHINAQVAKSHNIALIWNVKDFMSLSEQLRKQIRSAAKNNLFPKLTCAATTRQVVI

TKIKPHNSHEGKTFYVLPNDDTLRVEAFEYHHTDPSFLGRYMSALNHTKKWKYPQVNGLTSIKWADNNCYLA

TKIKPHNSHEGKTFYVLPNDDTLRVEAFEYHHTDPSFLGRYMSALNHTKKWKYPQVNGLTSIKWADNNCYLA

IMIAQYTSALLAGTITSGWTFGAGAALQIPFAMQMAYRFNGIGVTQNVLYENQKLIANQFNSAIGKIQDSLSS

KKVKPTVVVNAANVYLKHGGGVAGALNKATNNAMQVESDDYIATNGPLKVGGSVLSGHNLAKHCLHVVC

LLAGTITSGWTFGAGAALQIPFAMQMAYRFNGIGVTQNVLYENQKLIANQFNSAIGKIQDSLSSSTASALGKLO



VINGDRWFLNRFTTTLNDFNLVAMKYNYEPLTQDHVDILGPLSAQTGIAVLDMCASLKELLQNGMNGRTILC

IVKTTEVVGDIILKPANNSLKITEEVGHTDLMAAYVDNSSLTIKKPNELSRVLGLKTLATHGLAAVNSVPWDTIA

VRVVTTFDSEYCRHGTCERSEAGVCVSTSGRWVLNNDYYRSLPGVFCGVDAVNLLTNMFTPLIQPIGALDISA

ICSCDQLREPMLQSADAQSFLNGFAV\*

KKVKPTVVVNAANVYLKHGGGVAGALNKATNNAMQVESDDYIATNGPLKVGGSVLSGHNLAKHCLHVVC

·GLVAEWFLAYILFTRFFYVLGLAAIMQLFFSYFAVHFISNSWLMWLIINLVQMAPISAMVRMYIFFASFYYVW  
VENMTPRDLGACIDCSARHINAQVAKSHNIALIWNVKDFMSLSEQLRKQIRSAAKNNLFPKLTATTRQVVI

KKVKPTVVVNAANVYLKHGGGVAGALNKATNNAMQVESDDYIATNGPLKVGGSCVLSGHNLAKHCLHVVC

·KIKPHNSHEGKTFYVLPNDDTLRVEAFEYHHTDPSFLGRYMSALNHTKKWKYPQVNGLTSIKWADNNCYLA  
·VNGLTSIKWADNNCYLATALLTQQIELKFNPPALQDAYRARAGEAANFCALILAYCNKTVGELGDVRETMŠ  
VVIPDYNTYKNTCDGTTFTYASALWEIQQVVDADSKIVQLSEISMDNSPNLAWPLIVTALRANSAVKLQNNEL

^VADAVIKTLQPVSELLTPLGIDLDEWSMATYYLFDSEGEFKLASHMYCSFYPPDEDEEEGDCEEEEFEPSTQYE

·SIVAGGIVAIIVTCLAYYFMRFRRAFGEYSHVVAFNLLFLMSFTVLCLTPVYSFLPGVYSVIYLYLTFYLTNDVSI  
·SIVAGGIVAIIVTCLAYYFMRFRRAFGEYSHVVAFNLLFLMSFTVLCLTPVYSFLPGVYSVIYLYLTFYLTNDVSI  
VMVMFTPLVPFWITIAYIICISTKHFYWFFSNYLRVVFNGVSFSTFEEAALCTFLLNKEMYLKLRSVLLPLTQ

VADAVIKTLQPVSELLTPLGIDLDEWSMATYYLFDESGEFKLASHMYCSFYPPDEDEEEGDCEEEEFEPSTQYE  
LLAGTITSGWTFGAGAALQIPFAMQMAYRFNGIGVTQNVLYENQKLIANQFNNSAIGKIQDLSSTASALGKLO

VNGLTSIKWADNNCYLATALLTQQIELKFNPPALQDAYYRARAGEAANFCALILAYCNKTVGELGDVRETMS

VINGDRWFLNRFTTTLNDFNLVAMKYNYEPLTQDHVDILGPLSAQTGIAVLDMCASLKELLQNGMNGRTILC

QYNRYLALYNKYKYFSGAMDTTSYREAACCHLAKALNDFSNSGSDVLYQPPQTSITSAVLQSGFRKMAFPSGK\

SIVAGGIVAIVVTCLAYYFMRFRRAFGEYSHVVAFNLLFLMSFTVLCLTPVYSFLPGVYSVIYLYLTFYLTND

.KWARFPKSDGTGTIYTELEPPCRFVTDTPKGPVKYLYFIKGLNNLNRGMVLGSLAATVRLQAGNATEVPAN!

3PNVNKGEDIQLLKSAYENFNQHEVLLAPLLSAGIFGADPIHSLRVCVDTVRTNVYLAVFDKNLYDKLVSSFLEN

NVVTTKIALKGGKIVNNWLKQLIKVTLVFLVAAIFYLITPVHVMSKHTDFSSEIIGYKAIDGGVTRDIASDTDCF/

^TALLTLQQIELKFNPPALQDAYRARAGEAANFCALILAYCNKTVGELGDVRETMSYLFQHANLDSCKRVLN\

^TALLTLQQIELKFNPPALQDAYRARAGEAANFCALILAYCNKTVGELGDVRETMSYLFQHANLDSCKRVLN\

TASALGKLQDVVNQNAQALNTLVKQLSSNFGAISSVLNDILSRLDKVEAEVQIDRLITGRLQSLQTYVTQQLIR/

3PNVNKGEDIQLLKSAYENFNQHEVLLAPLLSAGIFGADPIHSLRVCVDTVRTNVYLAVFDKNLYDKLVSSFLEN

QDVVNQNAQALNTLVKQLSSNFGAISSVLNDILSRLDKVEAEVQIDRLITGRLQSLQTYVTQQLIRAAEIRASANI

3SALLEDEFTPFDVVRQCSGVTFQSAVKRTIKGTHHWLLLILTSLLVLVQSTQWSLFFFLYENAFLPFAMGIIAN

4NYAKPFLNKVVSTTTNIVTRCLNRVCTNYMPYFFLLLQLCTFTRSTNSRIKASMPPTIAKNTVKSVMGKFCLEAS

SIVAGGIVAIVVTCLAYYFMRFRRAFGEYSHVAFNTLLFLMSFTVLCLTPVYSFLPGVYSVIYLYLTFYLTND

3PNVKNKEDIQLLKSAYENFNQHEVLLAPLLSAGIFGADPIHSLRVCVDTVRTNVYLAVFDPKNLYDKLVSSFLEN

'KSYVHVVDGCNSSTCMMCYKRNRRATRVECTTIVNGVRRSFYVYANGGKGFCKLHNWNCVNCDTFCAGSTF  
NVVTTKIALKGGKIVNNWLKQLIKVTLVFLFVAAIFYLITPVHVMSKHTDFSSEIIGYKAIDGGVTRDIASDTCF/

3PNVNKGEDIQLLKSAYENFNQHEVLLAPLLSAGIFGADPIHSLRVCVDTVRTNVYLAVFDKNLYDKLVSSFLEN

ATALLTQQIELKFNPPALQDAYRARAGEAANFCALILAYCNKTVGELGDVRETMSYLFQHANLDSCKRVLN  
SYLFQHANLDSCKRVLNVVCKTCGQQQTTLKGVEAVMYMGTLSEYEQFKKGVQIPCTCGKQATKYLQQESPI  
.SPVALRQMSCAAGTTQTACTDDNALAYYNTTKGGRFVLALLSDLQDLKWARFPKSDGTGTIYTELEPPCRFV

:YGTEDDYQGKPLEFGATSAAALQPEEEQEEDWLDDDSQQTVGQQDGSSEDNQTTTIQTIVEVQPQLEMELTP'

FLAHIQWMVMFTPLVPFWITIAIICISTKHFYWFFSNYLKRRVVFNGVSFSTFEEAALCTFLLNKEMYLK  
FLAHIQWMVMFTPLVPFWITIAIICISTKHFYWFFSNYLKRRVVFNGVSFSTFEEAALCTFLLNKEMYLK  
QYNRYLALYNKYKYFSGAMDTTSYREAACCHLAKALNDFSNVSGSDVLYQPPQTSITSAVLQSGFRKMAFPSGK\

YGTEDDYQGKPLEFGATSAALQPEEEQEEDWLDDDSQQTVGQQDGSSEDNQTTTIQTIVEVQPQLEMELTP'  
QDVVNQNAQALNTLVKQLSSNFGAISSVLNDILSRDKVEAEVQIDRLITGRQLQSLQTYVTQQLIRAAEIRASANI

SYLFQHANLDSCKRVLNVVCKTCGQQQTTLKGVEAVMYMGTLSEYEQFKKGVQIPCTCGKQATKYLVQQESPI

SSALLEDEFTPFVVRQCSGVTFQSAVKRTIKGTHHWLLLTLTSLLVLVQSTQWSLFFFLYENAFLPFAMGIIAN

√E

STVLSFCAFAVDAAKAYKDYLASGGQPIT

/KSEK

AN

/VCKT

/VCKT

A

/KSEK

L



MSAFAMMFV

SN

MSKSEK

ISDEVAR  
AN

AKSEK

VCKT

FVMMSAPPA

TDTPKGPVKYLYFIKGLNNLNRGMVLG

VVQTIE

VE

VVQTIE

L

FVMMSAPPA

MSAFAMMFV

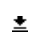

|          | subgenome | ref_leader_ei | peak_leader_ref | TRS_start | peak_TRS_start | peak_count    |
|----------|-----------|---------------|-----------------|-----------|----------------|---------------|
| Sample_1 | S         | 65            | 65              | 21552     | 21552          | 156(156,152,  |
|          | ORF3a     | 69            | 69              | 25385     | 25385          | 5(5,0,0,0)    |
|          | E         | 69            | 69              | 26237     | 26237          | 12(12,0,0,0)  |
|          | M         | 65            | 65              | 26469     | 26469          | 305(305,304,  |
|          | ORF6      | 69            | 69              | 27041     | 27041          | 136(131,135,  |
|          | ORF7a     | 69            | 0               | 27388     | 0              | 0             |
|          | ORF7b     | 65            | 0               | 27644     | 0              | 0             |
|          | ORF8      | 65            | 0               | 27884     | 0              | 0             |
|          | N         | 65            | 64              | 28256     | 28255          | 509(509,504,  |
|          | ORF10     | 65            | 0               | 29530     | 0              | 0             |
| Sample_2 | S         | 65            | 65              | 21552     | 21552          | 298(296,291,  |
|          | ORF3a     | 69            | 69              | 25385     | 25385          | 4(4,0,0,0)    |
|          | E         | 69            | 69              | 26237     | 26237          | 45(45,0,0,0)  |
|          | M         | 65            | 65              | 26469     | 26469          | 71(71,66,66,6 |
|          | ORF6      | 69            | 69              | 27041     | 27041          | 32(32,30,30,3 |
|          | ORF7a     | 69            | 69              | 27388     | 27388          | 1(1,0,0,0)    |
|          | ORF7b     | 65            | 0               | 27644     | 0              | 0             |
|          | ORF8      | 65            | 0               | 27884     | 0              | 0             |
|          | N         | 65            | 65              | 28256     | 28256          | 1996(1991,19  |
|          | ORF10     | 65            | 0               | 29530     | 0              | 0             |
| Sample_3 | S         | 65            | 65              | 21552     | 21552          | 1022(1007,96  |
|          | ORF3a     | 69            | 69              | 25385     | 25385          | 13(11,0,0,0)  |
|          | E         | 69            | 69              | 26237     | 26237          | 97(97,0,0,0)  |
|          | M         | 65            | 65              | 26469     | 26469          | 1384(1382,12  |
|          | ORF6      | 69            | 69              | 27041     | 27041          | 583(581,569,  |
|          | ORF7a     | 69            | 69              | 27388     | 27388          | 34(19,33,18,1 |
|          | ORF7b     | 65            | 0               | 27644     | 0              | 0             |
|          | ORF8      | 65            | 65              | 27884     | 27884          | 3(2,0,0,0)    |
|          | N         | 65            | 65              | 28256     | 28256          | 3462(3452,33  |
|          | ORF10     | 65            | 0               | 29530     | 0              | 0             |
| Sample_4 | S         | 65            | 0               | 21552     | 0              | 0             |
|          | ORF3a     | 69            | 0               | 25385     | 0              | 0             |
|          | E         | 69            | 0               | 26237     | 0              | 0             |
|          | M         | 65            | 65              | 26469     | 26469          | 276(276,276,  |
|          | ORF6      | 69            | 0               | 27041     | 0              | 0             |
|          | ORF7a     | 69            | 0               | 27388     | 0              | 0             |
|          | ORF7b     | 65            | 0               | 27644     | 0              | 0             |
|          | ORF8      | 65            | 0               | 27884     | 0              | 0             |
|          | N         | 65            | 0               | 28256     | 0              | 0             |
|          | ORF10     | 65            | 0               | 29530     | 0              | 0             |
|          | S         | 65            | 0               | 21552     | 0              | 0             |
|          | ORF3a     | 69            | 0               | 25385     | 0              | 0             |

|          |       |    |    |       |       |                |
|----------|-------|----|----|-------|-------|----------------|
| Sample_5 | E     | 69 | 0  | 26237 | 0     | 0              |
|          | M     | 65 | 0  | 26469 | 0     | 0              |
|          | ORF6  | 69 | 0  | 27041 | 0     | 0              |
|          | ORF7a | 69 | 0  | 27388 | 0     | 0              |
|          | ORF7b | 65 | 0  | 27644 | 0     | 0              |
|          | ORF8  | 65 | 0  | 27884 | 0     | 0              |
|          | N     | 65 | 64 | 28256 | 28255 | 433(432,431,   |
|          | ORF10 | 65 | 0  | 29530 | 0     | 0              |
|          | S     | 65 | 65 | 21552 | 21552 | 715(713,677,   |
|          | ORF3a | 69 | 69 | 25385 | 25385 | 5(5,0,0,0)     |
| Sample_6 | E     | 69 | 69 | 26237 | 26237 | 115(115,2,2,2  |
|          | M     | 65 | 65 | 26469 | 26469 | 1178(1176,11   |
|          | ORF6  | 69 | 69 | 27041 | 27041 | 410(409,403,   |
|          | ORF7a | 69 | 69 | 27388 | 27388 | 6(0,6,0,4)     |
|          | ORF7b | 65 | 0  | 27644 | 0     | 0              |
|          | ORF8  | 65 | 0  | 27884 | 0     | 0              |
|          | N     | 65 | 65 | 28256 | 28256 | 1135(1126,11   |
|          | ORF10 | 65 | 0  | 29530 | 0     | 0              |
|          | S     | 65 | 65 | 21552 | 21552 | 324(324,313,   |
|          | ORF3a | 69 | 69 | 25385 | 25385 | 7(7,0,0,0)     |
| Sample_7 | E     | 69 | 69 | 26237 | 26237 | 87(87,2,2,2)   |
|          | M     | 65 | 65 | 26469 | 26469 | 639(639,629,   |
|          | ORF6  | 69 | 69 | 27041 | 27041 | 486(485,471,   |
|          | ORF7a | 69 | 0  | 27388 | 0     | 0              |
|          | ORF7b | 65 | 0  | 27644 | 0     | 0              |
|          | ORF8  | 65 | 65 | 27884 | 27884 | 1(1,0,0,0)     |
|          | N     | 65 | 65 | 28256 | 28256 | 1847(1843,17   |
|          | ORF10 | 65 | 0  | 29530 | 0     | 0              |
|          | S     | 65 | 0  | 21552 | 0     | 0              |
|          | ORF3a | 69 | 0  | 25385 | 0     | 0              |
| Sample_8 | E     | 69 | 0  | 26237 | 0     | 0              |
|          | M     | 65 | 0  | 26469 | 0     | 0              |
|          | ORF6  | 69 | 0  | 27041 | 0     | 0              |
|          | ORF7a | 69 | 0  | 27388 | 0     | 0              |
|          | ORF7b | 65 | 0  | 27644 | 0     | 0              |
|          | ORF8  | 65 | 0  | 27884 | 0     | 0              |
|          | N     | 65 | 65 | 28256 | 28256 | 2502(2498,24   |
|          | ORF10 | 65 | 0  | 29530 | 0     | 0              |
|          | S     | 65 | 65 | 21552 | 21552 | 112(111,112,   |
|          | ORF3a | 69 | 69 | 25385 | 25385 | 4(4,0,0,0)     |
| Sample_9 | E     | 69 | 69 | 26237 | 26237 | 171(170,0,0,0) |
|          | M     | 65 | 65 | 26469 | 26469 | 993(993,983,   |
|          | ORF6  | 69 | 69 | 27041 | 27041 | 334(333,328,   |

|           |       |    |    |       |       |               |
|-----------|-------|----|----|-------|-------|---------------|
| Sample_7  | ORF7a | 69 | 69 | 27388 | 27388 | 8(1,7,0,2)    |
|           | ORF7b | 65 | 0  | 27644 | 0     | 0             |
|           | ORF8  | 65 | 0  | 27884 | 0     | 0             |
|           | N     | 65 | 65 | 28256 | 28256 | 11960(11926   |
|           | ORF10 | 65 | 0  | 29530 | 0     | 0             |
|           | S     | 65 | 65 | 21552 | 21552 | 656(655,617,  |
|           | ORF3a | 69 | 69 | 25385 | 25385 | 8(6,0,0,0)    |
|           | E     | 69 | 69 | 26237 | 26237 | 62(62,0,0,0)  |
|           | M     | 65 | 65 | 26469 | 26469 | 1549(1548,15  |
|           | ORF6  | 69 | 69 | 27041 | 27041 | 429(429,407,  |
| Sample_10 | ORF7a | 69 | 69 | 27388 | 27388 | 5(3,4,2,2)    |
|           | ORF7b | 65 | 0  | 27644 | 0     | 0             |
|           | ORF8  | 65 | 65 | 27884 | 27884 | 3(3,0,0,0)    |
|           | N     | 65 | 64 | 28256 | 28255 | 5681(5670,55  |
|           | ORF10 | 65 | 0  | 29530 | 0     | 0             |
|           | S     | 65 | 65 | 21552 | 21552 | 1283(1274,12  |
|           | ORF3a | 69 | 69 | 25385 | 25385 | 3(3,0,0,0)    |
|           | E     | 69 | 69 | 26237 | 26237 | 274(273,2,2,4 |
|           | M     | 65 | 65 | 26469 | 26469 | 2213(2212,20  |
|           | ORF6  | 69 | 69 | 27041 | 27041 | 925(924,904,  |
| Sample_11 | ORF7a | 69 | 69 | 27388 | 27388 | 30(3,29,2,2)  |
|           | ORF7b | 65 | 0  | 27644 | 0     | 0             |
|           | ORF8  | 65 | 0  | 27884 | 0     | 0             |
|           | N     | 65 | 65 | 28256 | 28256 | 8846(8822,86  |
|           | ORF10 | 65 | 0  | 29530 | 0     | 0             |
|           | S     | 65 | 65 | 21552 | 21552 | 641(639,593,  |
|           | ORF3a | 69 | 69 | 25385 | 25385 | 19(16,0,0,0)  |
|           | E     | 69 | 69 | 26237 | 26237 | 134(134,2,2,2 |
|           | M     | 65 | 65 | 26469 | 26469 | 1947(1943,18  |
|           | ORF6  | 69 | 69 | 27041 | 27041 | 796(795,758,  |
| Sample_12 | ORF7a | 69 | 69 | 27388 | 27388 | 10(9,3,2,2)   |
|           | ORF7b | 65 | 68 | 27644 | 27677 | 12(12,12,12,1 |
|           | ORF8  | 65 | 0  | 27884 | 0     | 0             |
|           | N     | 65 | 64 | 28256 | 28255 | 3861(3860,38  |
|           | ORF10 | 65 | 0  | 29530 | 0     | 0             |
|           | S     | 65 | 0  | 21552 | 0     | 0             |
|           | ORF3a | 69 | 0  | 25385 | 0     | 0             |
|           | E     | 69 | 0  | 26237 | 0     | 0             |
|           | M     | 65 | 0  | 26469 | 0     | 0             |
|           | ORF6  | 69 | 0  | 27041 | 0     | 0             |
| Sample_13 | ORF7a | 69 | 0  | 27388 | 0     | 0             |
|           | ORF7b | 65 | 0  | 27644 | 0     | 0             |
|           | ORF8  | 65 | 0  | 27884 | 0     | 0             |

|           |       |    |    |       |       |              |
|-----------|-------|----|----|-------|-------|--------------|
|           | N     | 65 | 65 | 28256 | 28256 | 1599(1594,15 |
|           | ORF10 | 65 | 0  | 29530 | 0     | 0            |
|           | S     | 65 | 65 | 21552 | 21552 | 711(710,703, |
|           | ORF3a | 69 | 69 | 25385 | 25385 | 0(0,0,0,0)   |
|           | E     | 69 | 0  | 26237 | 0     | 0            |
|           | M     | 65 | 65 | 26469 | 26469 | 1647(1647,16 |
| Sample_14 | ORF6  | 69 | 0  | 27041 | 0     | 0            |
|           | ORF7a | 69 | 0  | 27388 | 0     | 0            |
|           | ORF7b | 65 | 0  | 27644 | 0     | 0            |
|           | ORF8  | 65 | 0  | 27884 | 0     | 0            |
|           | N     | 65 | 65 | 28256 | 28256 | 1445(1440,14 |
|           | ORF10 | 65 | 0  | 29530 | 0     | 0            |
|           | S     | 65 | 65 | 21552 | 21552 | 325(325,324, |
|           | ORF3a | 69 | 69 | 25385 | 25385 | 3(3,0,0,0)   |
|           | E     | 69 | 69 | 26237 | 26237 | 43(43,0,0,0) |
|           | M     | 65 | 65 | 26469 | 26469 | 242(242,237, |
| Sample_15 | ORF6  | 69 | 0  | 27041 | 0     | 0            |
|           | ORF7a | 69 | 0  | 27388 | 0     | 0            |
|           | ORF7b | 65 | 0  | 27644 | 0     | 0            |
|           | ORF8  | 65 | 0  | 27884 | 0     | 0            |
|           | N     | 65 | 65 | 28256 | 28256 | 870(868,859, |
|           | ORF10 | 65 | 0  | 29530 | 0     | 0            |

The numbers in the bracket are (reads with left primers, reads with right primers, reads with both primers).  
Normalized count=(Read count/Total number of read mapped on reference genome)\*1000000.  
Total number of read mapped on reference genome is 1043447, 1313236, 3073041, 224581, 83  
“ref\_leader\_end” and “peak\_leader\_end” point to the reference position of the end of leader at





|                                                                       |   |   |
|-----------------------------------------------------------------------|---|---|
| 0                                                                     | 0 | 0 |
| 0                                                                     | 0 | 0 |
| 0                                                                     | 0 | 0 |
| 0                                                                     | 0 | 0 |
| 0                                                                     | 0 | 0 |
| 0                                                                     | 0 | 0 |
| 519.94(518.7 643(642,636, 772.11(770.91,763.71,762.51,763.71)         |   |   |
| 0                                                                     | 0 | 0 |
| 346.11(345.1 720(718,681, 348.53(347.56,329.65,328.68,330.13)         |   |   |
| 2.42(2.42,0.0 5(5,0,0,0) 2.42(2.42,0.00,0.00,0.00)                    |   |   |
| 55.67(55.67,( 115(115,2,2,255.67(55.67,0.97,0.97,0.97)                |   |   |
| 570.23(569.2 1179(1177,11570.71(569.74,552.80,551.83,527.63)          |   |   |
| 198.47(197.9 416(415,409, 201.37(200.89,197.98,197.50,184.91)         |   |   |
| 2.90(0.00,2.9 6(0,6,0,4) 2.90(0.00,2.90,0.00,1.94)                    |   |   |
| 0                                                                     | 0 | 0 |
| 0                                                                     | 0 | 0 |
| 549.41(545.0 1736(1722,16840.33(833.56,814.68,808.39,781.28)          |   |   |
| 0                                                                     | 0 | 0 |
| 149.46(149.4 343(343,332, 158.22(158.22,153.15,153.15,150.38)         |   |   |
| 3.23(3.23,0.0 7(7,0,0,0) 3.23(3.23,0.00,0.00,0.00)                    |   |   |
| 40.13(40.13,( 87(87,2,2,2) 40.13(40.13,0.92,0.92,0.92)                |   |   |
| 294.77(294.7 639(639,629, 294.77(294.77,290.15,290.15,286.92)         |   |   |
| 224.19(223.7 486(485,471, 224.19(223.73,217.27,216.81,216.81)         |   |   |
| 0                                                                     | 0 | 0 |
| 0                                                                     | 0 | 0 |
| 0.46(0.46,0.0 1(1,0,0,0) 0.46(0.46,0.00,0.00,0.00)                    |   |   |
| 852.01(850.1 3044(3037,291404.18(1400.95,1371.89,1369.12,1353.44)     |   |   |
| 0                                                                     | 0 | 0 |
| 0                                                                     | 0 | 0 |
| 0                                                                     | 0 | 0 |
| 0                                                                     | 0 | 0 |
| 0                                                                     | 0 | 0 |
| 0                                                                     | 0 | 0 |
| 0                                                                     | 0 | 0 |
| 0                                                                     | 0 | 0 |
| 0                                                                     | 0 | 0 |
| 0                                                                     | 0 | 0 |
| 25440.79(2542519(2515,2425613.65(25572.98,25288.27,25247.60,24220.61) |   |   |
| 0                                                                     | 0 | 0 |
| 79.33(78.62,7112(111,112, 79.33(78.62,79.33,78.62,79.33)              |   |   |
| 2.83(2.83,0.0 4(4,0,0,0) 2.83(2.83,0.00,0.00,0.00)                    |   |   |
| 121.12(120.4 171(170,0,0,( 121.12(120.41,0.00,0.00,0.00)              |   |   |
| 703.35(703.3 993(993,983, 703.35(703.35,696.27,696.27,685.64)         |   |   |
| 236.58(235.8 334(333,328, 236.58(235.87,232.33,231.62,230.91)         |   |   |



13108.17(1302485(2480,2420371.36(20330.37,20166.41,20125.43,19838.50)

0 0 0

574.31(573.5711(710,703, 574.31(573.50,567.85,567.04,562.19)

0.00(0.00,0.00(0,0,0,0) 0.00(0.00,0.00,0.00,0.00)

0 0 0

1330.36(13301647(1647,161330.36(1330.36,1307.74,1307.74,1282.70)

0 0 0

0 0 0

0 0 0

0 0 0

1167.19(11671452(1447,141172.85(1168.81,1161.54,1157.50,1143.77)

0 0 0

423.71(423.7325(325,324, 423.71(423.71,422.41,422.41,417.19)

3.91(3.91,0.00(3,0,0,0) 3.91(3.91,0.00,0.00,0.00)

56.06(56.06,0.00(43(43,0,0,0) 56.06(56.06,0.00,0.00,0.00)

315.50(315.5242(242,237, 315.50(315.50,308.98,308.98,305.07)

0 0 0

0 0 0

0 0 0

0 0 0

1134.24(11341880(878,869, 1147.28(1144.67,1132.94,1130.33,1079.48)

0 0 0

th primers, same junction on paired reads with at least a primer).

2781, 2065846, 2167817, 98346, 1411813, 2371630, 2350539, 2437210, 121985, 1238012 and 7  
nd the position of the end of leader identified in the most common reads (peak count) on the ref







'67034, excluding the mapped reads unpaired, not primary alignment and supplementary alignment, reference genome, and "ref\_TRS\_start" and "peak\_TRS\_start" refer to the reference position of the









ient.

the start of TRS and the position of the start of TRS identified in the most common reads (peak cou







nt) on the reference genome.

|          | subgenome | peak_leader_peak_TRS_start | ACGAAC | ATG_position | 20_leader_sequence |
|----------|-----------|----------------------------|--------|--------------|--------------------|
| Sample_1 | S         | 65                         | 21552  | yes          | 21563 ATCTCTTGTA   |
|          | ORF3a     | 69                         | 25385  | yes          | 25393 CTTGTAGATC   |
|          | E         | 69                         | 26237  | yes          | 26245 CTTGTAGATC   |
|          | M         | 65                         | 26469  | yes          | 26523 ATCTCTTGTA   |
|          | ORF6      | 69                         | 27041  | yes          | 27202 CTTGTAGATC   |
|          | N         | 64                         | 28255  | yes          | 28274 GATCTCTTGT   |
| Sample_2 | S         | 65                         | 21552  | yes          | 21563 ATCTCTTGTA   |
|          | ORF3a     | 69                         | 25385  | yes          | 25393 CTTGTAGATC   |
|          | E         | 69                         | 26237  | yes          | 26245 CTTGTAGATC   |
|          | M         | 65                         | 26469  | yes          | 26523 ATCTCTTGTA   |
|          | ORF6      | 69                         | 27041  | yes          | 27202 CTTGTAGATC   |
|          | ORF7a     | 69                         | 27388  | yes          | 27394 CTTGTAGATC   |
| Sample_3 | N         | 65                         | 28256  | yes          | 28274 ATCTCTTGTA   |
|          | S         | 65                         | 21552  | yes          | 21563 ATCTCTTGTA   |
|          | ORF3a     | 69                         | 25385  | yes          | 25393 CTTGTAGATC   |
|          | E         | 69                         | 26237  | yes          | 26245 CTTGTAGATC   |
|          | M         | 65                         | 26469  | yes          | 26523 ATCTCTTGTA   |
|          | ORF6      | 69                         | 27041  | yes          | 27202 CTTGTAGATC   |
| Sample_4 | ORF7a     | 69                         | 27388  | yes          | 27394 CTTGTAGATC   |
|          | ORF8      | 65                         | 27884  | yes          | 27894 ATCTCTTGTA   |
|          | N         | 65                         | 28256  | yes          | 28274 ATCTCTTGTA   |
| Sample_5 | M         | 65                         | 26469  | yes          | 26523 ATCTCTTGTA   |
| Sample_6 | N         | 64                         | 28255  | yes          | 28274 GATCTCTTGT   |
|          | S         | 65                         | 21552  | yes          | 21563 ATCTCTTGTA   |
|          | ORF3a     | 69                         | 25385  | yes          | 25393 CTTGTAGATC   |
|          | E         | 69                         | 26237  | yes          | 26245 CTTGTAGATC   |
|          | M         | 65                         | 26469  | yes          | 26523 ATCTCTTGTA   |
|          | ORF6      | 69                         | 27041  | yes          | 27202 CTTGTAGATC   |
| Sample_7 | ORF7a     | 69                         | 27388  | yes          | 27394 CTTGTAGATC   |
|          | N         | 65                         | 28256  | yes          | 28274 ATCTCTTGTA   |
|          | S         | 65                         | 21552  | yes          | 21563 ATCTCTTGTA   |
|          | ORF3a     | 69                         | 25385  | yes          | 25393 CTTGTAGATC   |
|          | E         | 69                         | 26237  | yes          | 26245 CTTGTAGATC   |
|          | M         | 65                         | 26469  | yes          | 26523 ATCTCTTGTA   |
| Sample_8 | ORF6      | 69                         | 27041  | yes          | 27202 CTTGTAGATC   |
|          | ORF8      | 65                         | 27884  | yes          | 27894 ATCTCTTGTA   |
|          | N         | 65                         | 28256  | yes          | 28274 ATCTCTTGTA   |
| Sample_9 | N         | 65                         | 28256  | yes          | 28274 ATCTCTTGTA   |
|          | S         | 65                         | 21552  | yes          | 21563 ATCTCTTGTA   |
|          | ORF3a     | 69                         | 25385  | yes          | 25393 CTTGTAGATC   |
| Sample_9 | E         | 69                         | 26237  | yes          | 26245 CTTGTAGATC   |
|          | M         | 65                         | 26469  | yes          | 26523 ATCTCTTGTA   |



|           |       |    |       |     |       |             |
|-----------|-------|----|-------|-----|-------|-------------|
|           | ORF6  | 69 | 27041 | yes | 27202 | CTTGTAGATC  |
|           | ORF7a | 69 | 27388 | yes | 27394 | CTTGTAGATC  |
|           | N     | 65 | 28256 | yes | 28274 | ATCTCTTGTAI |
|           | S     | 65 | 21552 | yes | 21563 | ATCTCTTGTAI |
|           | ORF3a | 69 | 25385 | yes | 25393 | CTTGTAGATC  |
|           | E     | 69 | 26237 | yes | 26245 | CTTGTAGATC  |
| Sample_10 | M     | 65 | 26469 | yes | 26523 | ATCTCTTGTAI |
|           | ORF6  | 69 | 27041 | yes | 27202 | CTTGTAGATC  |
|           | ORF7a | 69 | 27388 | yes | 27394 | CTTGTAGATC  |
|           | ORF8  | 65 | 27884 | yes | 27894 | ATCTCTTGTAI |
|           | N     | 64 | 28255 | yes | 28274 | GATCTCTTGT. |
|           | S     | 65 | 21552 | yes | 21563 | ATCTCTTGTAI |
|           | ORF3a | 69 | 25385 | yes | 25393 | CTTGTAGATC  |
|           | E     | 69 | 26237 | yes | 26245 | CTTGTAGATC  |
| Sample_11 | M     | 65 | 26469 | yes | 26523 | ATCTCTTGTAI |
|           | ORF6  | 69 | 27041 | yes | 27202 | CTTGTAGATC  |
|           | ORF7a | 69 | 27388 | yes | 27394 | CTTGTAGATC  |
|           | N     | 65 | 28256 | yes | 28274 | ATCTCTTGTAI |
|           | S     | 65 | 21552 | yes | 21563 | ATCTCTTGTAI |
|           | ORF3a | 69 | 25385 | yes | 25393 | CTTGTAGATC  |
|           | E     | 69 | 26237 | yes | 26245 | CTTGTAGATC  |
| Sample_12 | M     | 65 | 26469 | yes | 26523 | ATCTCTTGTAI |
|           | ORF6  | 69 | 27041 | yes | 27202 | CTTGTAGATC  |
|           | ORF7a | 69 | 27388 | yes | 27394 | CTTGTAGATC  |
|           | ORF7b | 68 | 27677 | no  | 27756 | TCTTGTAGAT  |
|           | N     | 64 | 28255 | yes | 28274 | GATCTCTTGT. |
| Sample_13 | N     | 65 | 28256 | yes | 28274 | ATCTCTTGTAI |
|           | S     | 65 | 21552 | yes | 21563 | ATCTCTTGTAI |
| Sample_14 | ORF3a | 69 | 25385 | yes | 25393 | CTTGTAGATC  |
|           | M     | 65 | 26469 | yes | 26523 | ATCTCTTGTAI |
|           | N     | 65 | 28256 | yes | 28274 | ATCTCTTGTAI |
|           | S     | 65 | 21552 | yes | 21563 | ATCTCTTGTAI |
|           | ORF3a | 69 | 25385 | yes | 25393 | CTTGTAGATC  |
| Sample_15 | E     | 69 | 26237 | yes | 26245 | CTTGTAGATC  |
|           | M     | 65 | 26469 | yes | 26523 | ATCTCTTGTAI |
|           | N     | 65 | 28256 | yes | 28274 | ATCTCTTGTAI |

“peak\_leader” and “peak\_TRS\_start” point to the leader-TRS junctions in sheet "known", “ACGA

TRS\_seq first\_orf\_aa  
CTAAACGAAC MFVFLVLLPLVSSQCVNLTRTQLPPAYTNSFTRGVYYPDKVFRSSVLHSTQDLFLPFFSNVTW  
ACGAACTT MDLFMRIFTIGTVTLKQGEIKDATPSDFVRATAPIQASLPFGWLIVGVALLAVFQSASKIITLK  
ACGAACTT MYSFVSEETGLIVNSVLLFLAFVVLLVTLAILTALRLCAYCCNIVNVSLVKPSFYVYSRVKNLNS  
CTAAACGAAC MADSNGTITVEELKKLLEQWNLVIGFLFTWICLLQFAYANRNRFLYIIKLIFLWLLWPVTLACF  
ACGAACGCTT MFHLVDFQVTIAEILLIIMRTFKVSIWNLDYIINLIKNLSKSLTENKYSQLDEEQPMEID\*  
TCTAAACGAA MSDNGPQNQRNAPRITFGGSPSDSTGSNQNNGERSGARSKQRRPQGLPNNTASWFTALTQHI  
CTAAACGAAC MFVFLVLLPLVSSQCVNLTRTQLPPAYTNSFTRGVYYPDKVFRSSVLHSTQDLFLPFFSNVTW  
ACGAACTT MDLFMRIFTIGTVTLKQGEIKDATPSDFVRATAPIQASLPFGWLIVGVALLAVFQSASKIITLK  
ACGAACTT MYSFVSEETGLIVNSVLLFLAFVVLLVTLAILTALRLCAYCCNIVNVSLVKPSFYVYSRVKNLNS  
CTAAACGAAC MADSNGTITVEELKKLLEQWNLVIGFLFTWICLLQFAYANRNRFLYIIKLIFLWLLWPVTLACF  
ACGAACGCTT MFHLVDFQVTIAEILLIIMRTFKVSIWNLDYIINLIKNLSKSLTENKYSQLDEEQPMEID\*  
ACGAAC MKIILFLALITLATCELYHYQECVRGTTVLLKEPCSSGTYEGNSPFHPLADNKFALTCFSTQFAFA  
CTAAACGAAC MSDNGPQNQRNAPRITFGGSPSDSTGSNQNNGERSGARSKQRRPQGLPNNTASWFTALTQHI  
CTAAACGAAC MFVFLVLLPLVSSQCVNLTRTQLPPAYTNSFTRGVYYPDKVFRSSVLHSTQDLFLPFFSNVTW  
ACGAACTT MDLFMRIFTIGTVTLKQGEIKDATPSDFVRATAPIQASLPFGWLIVGVALLAVFQSASKIITLK  
ACGAACTT MYSFVSEETGLIVNSVLLFLAFVVLLVTLAILTALRLCAYCCNIVNVSLVKPSFYVYSRVKNLNS  
CTAAACGAAC MADSNGTITVEELKKLLEQWNLVIGFLFTWICLLQFAYANRNRFLYIIKLIFLWLLWPVTLACF  
ACGAACGCTT MFHLVDFQVTIAEILLIIMRTFKVSIWNLDYIINLIKNLSKSLTENKYSQLDEEQPMEID\*  
ACGAAC MKIILFLALITLATCELYHYQECVRGTTVLLKEPCSSGTYEGNSPFHPLADNKFALTCFSTQFAFA  
CTAAACGAAC MKFLVFLGIITTVAAFHQECSLQSQCTQHQPYYVDDPCPIHFYSKWKYIRVGARKSAPLIELCVDE  
CTAAACGAAC MSDNGPQNQRNAPRITFGGSPSDSTGSNQNNGERSGARSKQRRPQGLPNNTASWFTALTQHI  
CTAAACGAAC MADSNGTITVEELKKLLEQWNLVIGFLFTWICLLQFAYANRNRFLYIIKLIFLWLLWPVTLACF  
TCTAAACGAA MSDNGPQNQRNAPRITFGGSPSDSTGSNQNNGERSGARSKQRRPQGLPNNTASWFTALTQHI  
CTAAACGAAC MFVFLVLLPLVSSQCVNLTRTQLPPAYTNSFTRGVYYPDKVFRSSVLHSTQDLFLPFFSNVTW  
ACGAACTT MDLFMRIFTIGTVTLKQGEIKDATPSDFVRATAPIQASLPFGWLIVGVALLAVFQSASKIITLK  
ACGAACTT MYSFVSEETGLIVNSVLLFLAFVVLLVTLAILTALRLCAYCCNIVNVSLVKPSFYVYSRVKNLNS  
CTAAACGAAC MADSNGTITVEELKKLLEQWNLVIGFLFTWICLLQFAYANRNRFLYIIKLIFLWLLWPVTLACF  
ACGAACGCTT MFHLVDFQVTIAEILLIIMRTFKVSIWNLDYIINLIKNLSKSLTENKYSQLDEEQPMEID\*  
ACGAAC MKIILFLALITLATCELYHYQECVRGTTVLLKEPCSSGTYEGNSPFHPLADNKFALTCFSTQFAFA  
CTAAACGAAC MSDNGPQNQRNAPRITFGGSPSDSTGSNQNNGERSGARSKQRRPQGLPNNTASWFTALTQHI  
CTAAACGAAC MFVFLVLLPLVSSQCVNLTRTQLPPAYTNSFTRGVYYPDKVFRSSVLHSTQDLFLPFFSNVTW  
ACGAACTT MDLFMRIFTIGTVTLKQGEIKDATPSDFVRATAPIQASLPFGWLIVGVALLAVFQSASKIITLK  
ACGAACTT MYSFVSEETGLIVNSVLLFLAFVVLLVTLAILTALRLCAYCCNIVNVSLVKPSFYVYSRVKNLNS  
CTAAACGAAC MADSNGTITVEELKKLLEQWNLVIGFLFTWICLLQFAYANRNRFLYIIKLIFLWLLWPVTLACF  
ACGAACGCTT MFHLVDFQVTIAEILLIIMRTFKVSIWNLDYIINLIKNLSKSLTENKYSQLDEEQPMEID\*  
CTAAACGAAC MKFLVFLGIITTVAAFHQECSLQSQCTQHQPYYVDDPCPIHFYSKWKYIRVGARKSAPLIELCVDE  
CTAAACGAAC MSDNGPQNQRNAPRITFGGSPSDSTGSNQNNGERSGARSKQRRPQGLPNNTASWFTALTQHI  
CTAAACGAAC MSDNGPQNQRNAPRITFGGSPSDSTGSNQNNGERSGARSKQRRPQGLPNNTASWFTALTQHI  
CTAAACGAAC MFVFLVLLPLVSSQCVNLTRTQLPPAYTNSFTRGVYYPDKVFRSSVLHSTQDLFLPFFSNVTW  
ACGAACTT MDLFMRIFTIGTVTLKQGEIKDATPSDFVRATAPIQASLPFGWLIVGVALLAVFQSASKIITLK  
ACGAACTT MYSFVSEETGLIVNSVLLFLAFVVLLVTLAILTALRLCAYCCNIVNVSLVKPSFYVYSRVKNLNS  
CTAAACGAAC MADSNGTITVEELKKLLEQWNLVIGFLFTWICLLQFAYANRNRFLYIIKLIFLWLLWPVTLACF

ACGAACGCTT MFHLVDFQVTIAEILLIMRTFKVSIWNLDYIINLIKNLSKSLTENKYSQLDEEQPMEID\*  
ACGAAC MKIILFLALITLATCELYHYQECVRGTTVLLKEPCSSGTYEGNSPFHPLADNKFALTCFSTQFAFA  
CTAAACGAAC MSDNGPQNQRNAPRITFGGPDSTGSGNQNNGERSGARSKQRRPQGLPNNNTASWFTALTQHI  
CTAAACGAAC MFVFLVLLPLVSSQCVNLTRTQLPPAYTNSFTRGVYYPDKVFRSSVLHSTQDLFLPFFSNVTW  
ACGAACTT MDLFMRIFTIGTVTLKQGEIKDATPSDFVRATATIPIQASLPFGWLIVGVALLAVFQSASKIITLK  
ACGAACTT MYSFVSEETGLIVNSVLLFLAFVVFLLVTLAILTALRLCAYCCNIVNVLVSKPSFYVYSRVKNLNS  
CTAAACGAAC MADSNGTITVEELKKLLEQWNLVIGFLFTWICLLQFAYANRNRFLYIIKLIFLWLLWPVTLACF  
ACGAACGCTT MFHLVDFQVTIAEILLIMRTFKVSIWNLDYIINLIKNLSKSLTENKYSQLDEEQPMEID\*  
ACGAAC MKIILFLALITLATCELYHYQECVRGTTVLLKEPCSSGTYEGNSPFHPLADNKFALTCFSTQFAFA  
CTAAACGAAC MKFLVFLGIITVAAFHQECSLQSQCTQHQPYYVDDPCPIHFYSKWYIRVGARKSAPLIELCVDE,  
TCTAAACGAAC MSDNGPQNQRNAPRITFGGPDSTGSGNQNNGERSGARSKQRRPQGLPNNNTASWFTALTQHI  
CTAAACGAAC MFVFLVLLPLVSSQCVNLTRTQLPPAYTNSFTRGVYYPDKVFRSSVLHSTQDLFLPFFSNVTW  
ACGAACTT MDLFMRIFTIGTVTLKQGEIKDATPSDFVRATATIPIQASLPFGWLIVGVALLAVFQSASKIITLK  
ACGAACTT MYSFVSEETGLIVNSVLLFLAFVVFLLVTLAILTALRLCAYCCNIVNVLVSKPSFYVYSRVKNLNS  
CTAAACGAAC MADSNGTITVEELKKLLEQWNLVIGFLFTWICLLQFAYANRNRFLYIIKLIFLWLLWPVTLACF  
ACGAACGCTT MFHLVDFQVTIAEILLIMRTFKVSIWNLDYIINLIKNLSKSLTENKYSQLDEEQPMEID\*  
ACGAAC MKIILFLALITLATCELYHYQECVRGTTVLLKEPCSSGTYEGNSPFHPLADNKFALTCFSTQFAFA  
CTAAACGAAC MSDNGPQNQRNAPRITFGGPDSTGSGNQNNGERSGARSKQRRPQGLPNNNTASWFTALTQHI  
CTAAACGAAC MFVFLVLLPLVSSQCVNLTRTQLPPAYTNSFTRGVYYPDKVFRSSVLHSTQDLFLPFFSNVTW  
ACGAACTT MDLFMRIFTIGTVTLKQGEIKDATPSDFVRATATIPIQASLPFGWLIVGVALLAVFQSASKIITLK  
ACGAACTT MYSFVSEETGLIVNSVLLFLAFVVFLLVTLAILTALRLCAYCCNIVNVLVSKPSFYVYSRVKNLNS  
CTAAACGAAC MADSNGTITVEELKKLLEQWNLVIGFLFTWICLLQFAYANRNRFLYIIKLIFLWLLWPVTLACF  
ACGAACGCTT MFHLVDFQVTIAEILLIMRTFKVSIWNLDYIINLIKNLSKSLTENKYSQLDEEQPMEID\*  
ACGAAC MKIILFLALITLATCELYHYQECVRGTTVLLKEPCSSGTYEGNSPFHPLADNKFALTCFSTQFAFA  
AACTTTACTC` MIELSLIDFYLCFLAFLFLVLIMLIIFWFSLELQDHNETCHA\*  
TCTAAACGAAC MSDNGPQNQRNAPRITFGGPDSTGSGNQNNGERSGARSKQRRPQGLPNNNTASWFTALTQHI  
CTAAACGAAC MSDNGPQNQRNAPRITFGGPDSTGSGNQNNGERSGARSKQRRPQGLPNNNTASWFTALTQHI  
CTAAACGAAC MFVFLVLLPLVSSQCVNLTRTQLPPAYTNSFTRGVYYPDKVFRSSVLHSTQDLFLPFFSNVTW  
ACGAACTT MDLFMRIFTIGTVTLKQGEIKDATPSDFVRATATIPIQASLPFGWLIVGVALLAVFQSASKIITLK  
CTAAACGAAC MADSNGTITVEELKKLLEQWNLVIGFLFTWICLLQFAYANRNRFLYIIKLIFLWLLWPVTLACF  
CTAAACGAAC MSDNGPQNQRNAPRITFGGPDSTGSGNQNNGERSGARSKQRRPQGLPNNNTASWFTALTQHI  
CTAAACGAAC MFVFLVLLPLVSSQCVNLTRTQLPPAYTNSFTRGVYYPDKVFRSSVLHSTQDLFLPFFSNVTW  
ACGAACTT MDLFMRIFTIGTVTLKQGEIKDATPSDFVRATATIPIQASLPFGWLIVGVALLAVFQSASKIITLK  
ACGAACTT MYSFVSEETGLIVNSVLLFLAFVVFLLVTLAILTALRLCAYCCNIVNVLVSKPSFYVYSRVKNLNS  
CTAAACGAAC MADSNGTITVEELKKLLEQWNLVIGFLFTWICLLQFAYANRNRFLYIIKLIFLWLLWPVTLACF  
CTAAACGAAC MSDNGPQNQRNAPRITFGGPDSTGSGNQNNGERSGARSKQRRPQGLPNNNTASWFTALTQHI  
AC" indicates if there is a ACGAAC sequence in the "TRS\_seq" (TRS sequences), "20\_leader\_seq"

/FHAIHVSGTNGTKRFDNPVLPFNDGVYFASTEKSNIIRGWIFGTTLDSKTQSLIVNNATNVVIKVCEFCNDI  
:KRWQLALSCKGVHFCNLLLLFVTVYSHLLLVAAGLEAPFLYLYALVYFLQSFVRIIMRLWLCWKCRSKNPLLYI  
;SRVPDLLV\*  
VLAAYRINWITGGIAIAMAACLVLGMWLSYFIASFRLFARTRSMWSFNPETNILLNVPLHGTILTRPPLLESELVIG

GKEDLKFPRGQGVPIINTNSSPDDQIGYYRRATRRIRGGDGKMKDLSRWYFYLLGTGPEAGLPYGANKDGIIM  
/FHAIHVSGTNGTKRFDNPVLPFNDGVYFASTEKSNIIRGWIFGTTLDSKTQSLIVNNATNVVIKVCEFCNDI  
:KRWQLALSCKGVHFCNLLLLFVTVYSHLLLVAAGLEAPFLYLYALVYFLQSFVRIIMRLWLCWKCRSKNPLLYI  
;SRVPDLLV\*  
VLAAYRINWITGGIAIAMAACLVLGMWLSYFIASFRLFARTRSMWSFNPETNILLNVPLHGTILTRPPLLESELVIG

.CPDGVKHVYQLRARSVSPKLFIRQEEVQELYSPIFLIVAAIVFITLCFTLKRKTE\*  
GKEDLKFPRGQGVPIINTNSSPDDQIGYYRRATRRIRGGDGKMKDLSRWYFYLLGTGPEAGLPYGANKDGIIM  
/FHAIHVSGTNGTKRFDNPVLPFNDGVYFASTEKSNIIRGWIFGTTLDSKTQSLIVNNATNVVIKVCEFCNDI  
:KRWQLALSCKGVHFCNLLLLFVTVYSHLLLVAAGLEAPFLYLYALVYFLQSFVRIIMRLWLCWKCRSKNPLLYI  
;SRVPDLLV\*  
VLAAYRINWITGGIAIAMAACLVLGMWLSYFIASFRLFARTRSMWSFNPETNILLNVPLHGTILTRPPLLESELVIG

.CPDGVKHVYQLRARSVSPKLFIRQEEVQELYSPIFLIVAAIVFITLCFTLKRKTE\*  
AGSKSPIQYIDIGNYTVSCLPFTINCQEPKLGSLVVRCSFYEDFLEYHDVRVLDI\*  
GKEDLKFPRGQGVPIINTNSSPDDQIGYYRRATRRIRGGDGKMKDLSRWYFYLLGTGPEAGLPYGANKDGIIM  
VLAAYRINWITGGIAIAMAACLVLGMWLSYFIASFRLFARTRSMWSFNPETNILLNVPLHGTILTRPPLLESELVIG  
GKEDLKFPRGQGVPIINTNSSPDDQIGYYRRATRRIRGGDGKMKDLSRWYFYLLGTGPEAGLPYGANKDGIIM  
/FHAIHVSGTNGTKRFDNPVLPFNDGVYFASTEKSNIIRGWIFGTTLDSKTQSLIVNNATNVVIKVCEFCNDI  
:KRWQLALSCKGVHFCNLLLLFVTVYSHLLLVAAGLEAPFLYLYALVYFLQSFVRIIMRLWLCWKCRSKNPLLYI  
;SRVPDLLV\*  
VLAAYRINWITGGIAIAMAACLVLGMWLSYFIASFRLFARTRSMWSFNPETNILLNVPLHGTILTRPPLLESELVIG

.CPDGVKHVYQLRARSVSPKLFIRQEEVQELYSPIFLIVAAIVFITLCFTLKRKTE\*  
GKEDLKFPRGQGVPIINTNSSPDDQIGYYRRATRRIRGGDGKMKDLSRWYFYLLGTGPEAGLPYGANKDGIIM  
/FHAIHVSGTNGTKRFDNPVLPFNDGVYFASTEKSNIIRGWIFGTTLDSKTQSLIVNNATNVVIKVCEFCNDI  
:KRWQLALSCKGVHFCNLLLLFVTVYSHLLLVAAGLEAPFLYLYALVYFLQSFVRIIMRLWLCWKCRSKNPLLYI  
;SRVPDLLV\*  
VLAAYRINWITGGIAIAMAACLVLGMWLSYFIASFRLFARTRSMWSFNPETNILLNVPLHGTILTRPPLLESELVIG

AGSKSPIQYIDIGNYTVSCLPFTINCQEPKLGSLVVRCSFYEDFLEYHDVRVLDI\*  
GKEDLKFPRGQGVPIINTNSSPDDQIGYYRRATRRIRGGDGKMKDLSRWYFYLLGTGPEAGLPYGANKDGIIM  
GKEDLKFPRGQGVPIINTNSSPDDQIGYYRRATRRIRGGDGKMKDLSRWYFYLLGTGPEAGLPYGANKDGIIM  
/FHAIHVSGTNGTKRFDNPVLPFNDGVYFASTEKSNIIRGWIFGTTLDSKTQSLIVNNATNVVIKVCEFCNDI  
:KRWQLALSCKGVHFCNLLLLFVTVYSHLLLVAAGLEAPFLYLYALVYFLQSFVRIIMRLWLCWKCRSKNPLLYI  
;SRVPDLLV\*  
VLAAYRINWITGGIAIAMAACLVLGMWLSYFIASFRLFARTRSMWSFNPETNILLNVPLHGTILTRPPLLESELVIG

.CPDGVKHVYQLRARSVSPKLFIRQEEVQELYSPIFLIVAAIVFITLCFTLKRKTE\*  
GKEDLKFPRGQGVPIINTNSSPDDQIGYYRRATRRIRGGDGKMKDLSRWYFYLLGTGPEAGLPYGANKDGIIM  
/FHAIHVSGTNGTKRFDNPVLPFNDGVYFASTEKSNIIRGWIFGTTLDSKTQSLIVNNATNVVIKVCEFCNDI  
:KRWQLALSCKGVHFCNLLLLFVTVYSHLLLVAAGLEAPFLYLYALVYFLOQINFRVRIIMRLWLCWKCRSKNPLLYI  
SRVPDLLV\*  
VLAAYRINWITGGIAIAMAACLGLMWLSYFIASFRLFARTRSMWSFNPETNILLNVPLHGTILTRPPLLESELVIG

.CPDGVKHVYQLRARSVSPKLFIRQEEVQELYSPIFLIVAAIVFITLCFTLKRKTE\*  
AGSKSPIQYIDIGNYTVSCLPFTINCQEPKLGSLVVRCSFYEDFLEYHDVRVLDI\*  
GKEDLKFPRGQGVPIINTNSSPDDQIGYYRRATRRIRGGDGKMKDLSRWYFYLLGTGPEAGLPYGANKDGIIM  
/FHAIHVSGTNGTKRFDNPVLPFNDGVYFASTEKSNIIRGWIFGTTLDSKTQSLIVNNATNVVIKVCEFCNDI  
:KRWQLALSCKGVHFCNLLLLFVTVYSHLLLVAAGLEAPFLYLYALVYFLOQINFRVRIIMRLWLCWKCRSKNPLLYI  
SRVPDLLV\*  
VLAAYRINWITGGIAIAMAACLGLMWLSYFIASFRLFARTRSMWSFNPETNILLNVPLHGTILTRPPLLESELVIG

.CPDGVKHVYQLRARSVSPKLFIRQEEVQELYSPIFLIVAAIVFITLCFTLKRKTE\*  
GKEDLKFPRGQGVPIINTNSSPDDQIGYYRRATRRIRGGDGKMKDLSRWYFYLLGTGPEAGLPYGANKDGIIM  
/FHAIHVSGTNGTKRFDNPVLPFNDGVYFASTEKSNIIRGWIFGTTLDSKTQSLIVNNATNVVIKVCEFCNDI  
:KRWQLALSCKGVHFCNLLLLFVTVYSHLLLVAAGLEAPFLYLYALVYFLOQINFRVRIIMRLWLCWKCRSKNPLLYI  
SRVPDLLV\*  
VLAAYRINWITGGIAIAMAACLGLMWLSYFIASFRLFARTRSMWSFNPETNILLNVPLHGTILTRPPLLESELVIG

.CPDGVKHVYQLRARSVSPKLFIRQEEVQELYSPIFLIVAAIVFITLCFTLKRKTE\*

GKEDLKFPRGQGVPIINTNSSPDDQIGYYRRATRRIRGGDGKMKDLSRWYFYLLGTGPEAGLPYGANKDGIIM  
GKEDLKFPRGQGVPIINTNSSPDDQIGYYRRATRRIRGGDGKMKDLSRWYFYLLGTGPEAGLPYGANKDGIIM  
/FHAIHVSGTNGTKRFDNPVLPFNDGVYFASTEKSNIIRGWIFGTTLDSKTQSLIVNNATNVVIKVCEFCNDI  
:KRWQLALSCKGVHFCNLLLLFVTVYSHLLLVAAGLEAPFLYLYALVYFLOQINFRVRIIMRLWLCWKCRSKNPLLYI  
VLAAYRINWITGGIAIAMAACLGLMWLSYFIASFRLFARTRSMWSFNPETNILLNVPLHGTILTRPPLLESELVIG  
GKEDLKFPRGQGVPIINTNSSPDDQIGYYRRATRRIRGGDGKMKDLSRWYFYLLGTGPEAGLPYGANKDGIIM  
/FHAIHVSGTNGTKRFDNPVLPFNDGVYFASTEKSNIIRGWIFGTTLDSKTQSLIVNNATNVVIKVCEFCNDI  
:KRWQLALSCKGVHFCNLLLLFVTVYSHLLLVAAGLEAPFLYLYALVYFLOQINFRVRIIMRLWLCWKCRSKNPLLYI  
SRVPDLLV\*

VLAAYRINWITGGIAIAMAACLGLMWLSYFIASFRLFARTRSMWSFNPETNILLNVPLHGTILTRPPLLESELVIG  
GKEDLKFPRGQGVPIINTNSSPDDQIGYYRRATRRIRGGDGKMKDLSRWYFYLLGTGPEAGLPYGANKDGIIM  
refers to the 20 nucleotides before the end of leader, and "AUG\_postion" and "first\_orf\_aa" ref

ǃFLGVVYHKNNKSWMESEFRVYSSANNCTFEYVSQPFLMDLEGKQGNFKNLREFVFKNIDGYFKIYSKHTPINL'  
ǃANYFLCWHTNCYDYCIPYNSVTSSIVITSGDGTTSPISEHDYQIGGYTEKWESGVKDCVVLHSYFTSDYYQLYST

ǃAVILRGHLRIAGHHLGRCDIKDLPKEITVATSRTLSTYYKLGASQRVAGDSGFAAYSRYRIGNYKLNTDHSSSSDNI

/VATEGALNTPKDHIGTRNPANNAIVLQLPQGTTLPKGFYAEGSRGGSQASSRSSSRNSSRNSTPGSSRGT:  
ǃFLGVVYHKNNKSWMESEFRVYSSANNCTFEYVSQPFLMDLEGKQGNFKNLREFVFKNIDGYFKIYSKHTPINL'  
ǃANYFLCWHTNCYDYCIPYNSVTSSIVITSGDGTTSPISEHDYQIGGYTEKWESGVKDCVVLHSYFTSDYYQLYST

ǃAVILRGHLRIAGHHLGRCDIKDLPKEITVATSRTLSTYYKLGASQRVAGDSGFAAYSRYRIGNYKLNTDHSSSSDNI

/VATEGALNTPKDHIGTRNPANNAIVLQLPQGTTLPKGFYAEGSRGGSQASSRSSSRNSSRNSTPGSSRGT:  
ǃFLGVVYHKNNKSWMESEFRVYSSANNCTFEYVSQPFLMDLEGKQGNFKNLREFVFKNIDGYFKIYSKHTPINL'  
ǃANYFLCWHTNCYDYCIPYNSVTSSIVITSGDGTTSPISEHDYQIGGYTEKWESGVKDCVVLHSYFTSDYYQLYST

ǃAVILRGHLRIAGHHLGRCDIKDLPKEITVATSRTLSTYYKLGASQRVAGDSGFAAYSRYRIGNYKLNTDHSSSSDNI

/VATEGALNTPKDHIGTRNPANNAIVLQLPQGTTLPKGFYAEGSRGGSQASSRSSSRNSSRNSTPGSSRGT:  
ǃAVILRGHLRIAGHHLGRCDIKDLPKEITVATSRTLSTYYKLGASQRVAGDSGFAAYSRYRIGNYKLNTDHSSSSDNI  
/VATEGALNTPKDHIGTRNPANNAIVLQLPQGTTLPKGFYAEGSRGGSQASSRSSSRNSSRNSTPGSSRGT:  
ǃFLGVVYHKNNKSWMESEFRVYSSANNCTFEYVSQPFLMDLEGKQGNFKNLREFVFKNIDGYFKIYSKHTPINL'  
ǃANYFLCWHTNCYDYCIPYNSVTSSIVITSGDGTTSPISEHDYQIGGYTEKWESGVKDCVVLHSYFTSDYYQLYST

ǃAVILRGHLRIAGHHLGRCDIKDLPKEITVATSRTLSTYYKLGASQRVAGDSGFAAYSRYRIGNYKLNTDHSSSSDNI

/VATEGALNTPKDHIGTRNPANNAIVLQLPQGTTLPKGFYAEGSRGGSQASSRSSSRNSSRNSTPGSSRGT:  
ǃFLGVVYHKNNKSWMESEFRVYSSANNCTFEYVSQPFLMDLEGKQGNFKNLREFVFKNIDGYFKIYSKHTPINL'  
ǃANYFLCWHTNCYDYCIPYNSVTSSIVITSGDGTTSPISEHDYQIGGYTEKWESGVKDCVVLHSYFTSDYYQLYST

ǃAVILRGHLRIAGHHLGRCDIKDLPKEITVATSRTLSTYYKLGASQRVAGDSGFAAYSRYRIGNYKLNTDHSSSSDNI

/VATEGALNTPKDHIGTRNPANNAIVLQLPQGTTLPKGFYAEGSRGGSQASSRSSSRNSSRNSTPGSSRGT:  
/VATEGALNTPKDHIGTRNPANNAIVLQLPQGTTLPKGFYAEGSRGGSQASSRSSSRNSSRNSTPGSSRGT:  
ǃFLGVVYHKNNKSWMESEFRVYSSANNCTFEYVSQPFLMDLEGKQGNFKNLREFVFKNIDGYFKIYSKHTPINL'  
ǃANYFLCWHTNCYDYCIPYNSVTSSIVITSGDGTTSPISEHDYQIGGYTEKWESGVKDCVVLHSYFTSDYYQLYST

ǃAVILRGHLRIAGHHLGRCDIKDLPKEITVATSRTLSTYYKLGASQRVAGDSGFAAYSRYRIGNYKLNTDHSSSSDNI

/VATEGALNTPKDHIGTRNPANNAIVLQLPQGTTLPKGFYAEGSRGGSQASSRSSSRN SSRN STPGSSRGT:  
PFLGVVYHKNKSWMESEFRVYSSANNCTFEYVSQPFLMDLEGKQGNFKNLREFVFKNIDGYFKIYSKHTPINL'  
DANYFLCWHTNCYDYCIPYNSVTSSIVITSGDGTTSPISEHDYQIGGYTEKWESGVKDCVVLHSYFTSDYYQLYST

AVILRGHLRIAGHHLGRCDIKDLPKEITVATSRTL SYYKLGASQRVAGDSGFAAYSRYRIGNYKLNTDHSSSSDNI

/VATEGALNTPKDHIGTRNPANNAIVLQLPQGTTLPKGFYAEGSRGGSQASSRSSSRN SSRN STPGSSRGT:  
PFLGVVYHKNKSWMESEFRVYSSANNCTFEYVSQPFLMDLEGKQGNFKNLREFVFKNIDGYFKIYSKHTPINL'  
DANYFLCWHTNCYDYCIPYNSVTSSIVITSGDGTTSPISEHDYQIGGYTEKWESGVKDCVVLHSYFTSDYYQLYST

AVILRGHLRIAGHHLGRCDIKDLPKEITVATSRTL SYYKLGASQRVAGDSGFAAYSRYRIGNYKLNTDHSSSSDNI

/VATEGALNTPKDHIGTRNPANNAIVLQLPQGTTLPKGFYAEGSRGGSQASSRSSSRN SSRN STPGSSRGT:  
PFLGVVYHKNKSWMESEFRVYSSANNCTFEYVSQPFLMDLEGKQGNFKNLREFVFKNIDGYFKIYSKHTPINL'  
DANYFLCWHTNCYDYCIPYNSVTSSIVITSGDGTTSPISEHDYQIGGYTEKWESGVKDCVVLHSYFTSDYYQLYST

AVILRGHLRIAGHHLGRCDIKDLPKEITVATSRTL SYYKLGASQRVAGDSGFAAYSRYRIGNYKLNTDHSSSSDNI

/VATEGALNTPKDHIGTRNPANNAIVLQLPQGTTLPKGFYAEGSRGGSQASSRSSSRN SSRN STPGSSRGT:  
/VATEGALNTPKDHIGTRNPANNAIVLQLPQGTTLPKGFYAEGSRGGSQASSRSSSRN SSRN STPGSSRGT:  
PFLGVVYHKNKSWMESEFRVYSSANNCTFEYVSQPFLMDLEGKQGNFKNLREFVFKNIDGYFKIYSKHTPINL'  
DANYFLCWHTNCYDYCIPYNSVTSSIVITSGDGTTSPISEHDYQIGGYTEKWESGVKDCVVLHSYFTSDYYQLYST

AVILRGHLRIAGHHLGRCDIKDLPKEITVATSRTL SYYKLGASQRVAGDSGFAAYSRYRIGNYKLNTDHSSSSDNI

/VATEGALNTPKDHIGTRNPANNAIVLQLPQGTTLPKGFYAEGSRGGSQASSRSSSRN SSRN STPGSSRGT:  
PFLGVVYHKNKSWMESEFRVYSSANNCTFEYVSQPFLMDLEGKQGNFKNLREFVFKNIDGYFKIYSKHTPINL'  
DANYFLCWHTNCYDYCIPYNSVTSSIVITSGDGTTSPISEHDYQIGGYTEKWESGVKDCVVLHSYFTSDYYQLYST

AVILRGHLRIAGHHLGRCDIKDLPKEITVATSRTL SYYKLGASQRVAGDSGFAAYSRYRIGNYKLNTDHSSSSDNI

/VATEGALNTPKDHIGTRNPANNAIVLQLPQGTTLPKGFYAEGSRGGSQASSRSSSRN SSRN STPGSSRGT:  
er to the first AUG position and translated orf of the sgmRNA.

VRDLPQGFSALEPLVDLPIGINITRFQTLALHRSYLTPGDSSSGWTAGAAAYVGYLQPRTFLLKYNENGTITDA  
┌QLSTDTGVEHVTFEYFNKIVDEPEEHVQIHTIDGSSGVVNPVMEPIYDEPTTTTTSVPL\*

ALLVQ\*

SPARMAGNGGDAALALLLDRLNQLESKMSGKGQQQQGQTVTKKSAAEASKKPRQKRTATKAYNVTQAFGI  
VRDLPQGFSALEPLVDLPIGINITRFQTLALHRSYLTPGDSSSGWTAGAAAYVGYLQPRTFLLKYNENGTITDA  
┌QLSTDTGVEHVTFEYFNKIVDEPEEHVQIHTIDGSSGVVNPVMEPIYDEPTTTTTSVPL\*

ALLVQ\*

SPARMAGNGGDAALALLLDRLNQLESKMSGKGQQQQGQTVTKKSAAEASKKPRQKRTATKAYNVTQAFGI  
VRDLPQGFSALEPLVDLPIGINITRFQTLALHRSYLTPGDSSSGWTAGAAAYVGYLQPRTFLLKYNENGTITDA  
┌QLSTDTGVEHVTFEYFNKIVDEPEEHVQIHTIDGSSGVVNPVMEPIYDEPTTTTTSVPL\*

ALLVQ\*

SPARMAGNGGDAALALLLDRLNQLESKMSGKGQQQQGQTVTKKSAAEASKKPRQKRTATKAYNVTQAFGI  
ALLVQ\*  
SPARMAGNGGDAALALLLDRLNQLESKMSGKGQQQQGQTVTKKSAAEASKKPRQKRTATKAYNVTQAFGI  
VRDLPQGFSALEPLVDLPIGINITRFQTLALHRSYLTPGDSSSGWTAGAAAYVGYLQPRTFLLKYNENGTITDA  
┌QLSTDTGVEHVTFEYFNKIVDEPEEHVQIHTIDGSSGVVNPVMEPIYDEPTTTTTSVPL\*

ALLVQ\*

SPARMAGNGGDAALALLLDRLNQLESKMSGKGQQQQGQTVTKKSAAEASKKPRQKRTATKAYNVTQAFGI  
VRDLPQGFSALEPLVDLPIGINITRFQTLALHRSYLTPGDSSSGWTAGAAAYVGYLQPRTFLLKYNENGTITDA  
┌QLSTDTGVEHVTFEYFNKIVDEPEEHVQIHTIDGSSGVVNPVMEPIYDEPTTTTTSVPL\*

ALLVQ\*

SPARMAGNGGDAALALLLDRLNQLESKMSGKGQQQQGQTVTKKSAAEASKKPRQKRTATKAYNVTQAFGI  
SPARMAGNGGDAALALLLDRLNQLESKMSGKGQQQQGQTVTKKSAAEASKKPRQKRTATKAYNVTQAFGI  
VRDLPQGFSALEPLVDLPIGINITRFQTLALHRSYLTPGDSSSGWTAGAAAYVGYLQPRTFLLKYNENGTITDA  
┌QLSTDTGVEHVTFEYFNKIVDEPEEHVQIHTIDGSSGVVNPVMEPIYDEPTTTTTSVPL\*

ALLVQ\*



SPARMAGNGGDAALALLLDRLNQLESKMSGKGQQQQGQTVTKKSAAEASKKPRQKRTATKAYNVTQAFGI  
VRDLPQGFSALEPLVDLPIGINITRFQTLALHRSYLTPGDSSSGWTAGAAAYVGYLQPRTFLLKYNENGTITDA  
[QLSTDTGVEHVTFEYFNKIVDEPEEHVQIHTIDGSSGVVNPVMEPIYDEPTTTTTSVPL\*

ALLVQ\*

SPARMAGNGGDAALALLLDRLNQLESKMSGKGQQQQGQTVTKKSAAEASKKPRQKRTATKAYNVTQAFGI  
VRDLPQGFSALEPLVDLPIGINITRFQTLALHRSYLTPGDSSSGWTAGAAAYVGYLQPRTFLLKYNENGTITDA  
[QLSTDTGVEHVTFEYFNKIVDEPEEHVQIHTIDGSSGVVNPVMEPIYDEPTTTTTSVPL\*

ALLVQ\*

SPARMAGNGGDAALALLLDRLNQLESKMSGKGQQQQGQTVTKKSAAEASKKPRQKRTATKAYNVTQAFGI  
VRDLPQGFSALEPLVDLPIGINITRFQTLALHRSYLTPGDSSSGWTAGAAAYVGYLQPRTFLLKYNENGTITDA  
[QLSTDTGVEHVTFEYFNKIVDEPEEHVQIHTIDGSSGVVNPVMEPIYDEPTTTTTSVPL\*

ALLVQ\*

SPARMAGNGGDAALALLLDRLNQLESKMSGKGQQQQGQTVTKKSAAEASKKPRQKRTATKAYNVTQAFGI  
SPARMAGNGGDAALALLLDRLNQLESKMSGKGQQQQGQTVTKKSAAEASKKPRQKRTATKAYNVTQAFGI  
VRDLPQGFSALEPLVDLPIGINITRFQTLALHRSYLTPGDSSSGWTAGAAAYVGYLQPRTFLLKYNENGTITDA  
[QLSTDTGVEHVTFEYFNKIVDEPEEHVQIHTIDGSSGVVNPVMEPIYDEPTTTTTSVPL\*

ALLVQ\*

SPARMAGNGGDAALALLLDRLNQLESKMSGKGQQQQGQTVTKKSAAEASKKPRQKRTATKAYNVTQAFGI  
VRDLPQGFSALEPLVDLPIGINITRFQTLALHRSYLTPGDSSSGWTAGAAAYVGYLQPRTFLLKYNENGTITDA  
[QLSTDTGVEHVTFEYFNKIVDEPEEHVQIHTIDGSSGVVNPVMEPIYDEPTTTTTSVPL\*

ALLVQ\*

SPARMAGNGGDAALALLLDRLNQLESKMSGKGQQQQGQTVTKKSAAEASKKPRQKRTATKAYNVTQAFGI

\VDCALDPLSETKCTLKSTVEKGIYQTSNFRVQPTESIVRFPNITNLCPFGEVFNATRFASVYAWNRKRISNCVA

RGPEQTQGNFGDQELIRQGTDYKHWPQIAQFAPSASAFFGMSRIGMEVTPSGTWLTYTGAIKLDDKDPNFK  
\VDCALDPLSETKCTLKSTVEKGIYQTSNFRVQPTESIVRFPNITNLCPFGEVFNATRFASVYAWNRKRISNCVA

RGPEQTQGNFGDQELIRQGTDYKHWPQIAQFAPSASAFFGMSRIGMEVTPSGTWLTYTGAIKLDDKDPNFK  
\VDCALDPLSETKCTLKSTVEKGIYQTSNFRVQPTESIVRFPNITNLCPFGEVFNATRFASVYAWNRKRISNCVA

RGPEQTQGNFGDQELIRQGTDYKHWPQIAQFAPSASAFFGMSRIGMEVTPSGTWLTYTGAIKLDDKDPNFK

RGPEQTQGNFGDQELIRQGTDYKHWPQIAQFAPSASAFFGMSRIGMEVTPSGTWLTYTGAIKLDDKDPNFK  
\VDCALDPLSETKCTLKSTVEKGIYQTSNFRVQPTESIVRFPNITNLCPFGEVFNATRFASVYAWNRKRISNCVA

RGPEQTQGNFGDQELIRQGTDYKHWPQIAQFAPSASAFFGMSRIGMEVTPSGTWLTYTGAIKLDDKDPNFK  
\VDCALDPLSETKCTLKSTVEKGIYQTSNFRVQPTESIVRFPNITNLCPFGEVFNATRFASVYAWNRKRISNCVA

RGPEQTQGNFGDQELIRQGTDYKHWPQIAQFAPSASAFFGMSRIGMEVTPSGTWLTYTGAIKLDDKDPNFK  
RGPEQTQGNFGDQELIRQGTDYKHWPQIAQFAPSASAFFGMSRIGMEVTPSGTWLTYTGAIKLDDKDPNFK  
\VDCALDPLSETKCTLKSTVEKGIYQTSNFRVQPTESIVRFPNITNLCPFGEVFNATRFASVYAWNRKRISNCVA

RGPEQTQGNFGDQELIRQGTDYKHWPQIAQFAPSASAFFGMSRIGMEVTPSGTWLTYTGAIKLDDKDPNFK  
VDCALDPLSETKCTLSFTVEKGIYQTSNFRVQPTESIVRFPNITNLCPFGEVFNATRFASVYAWNRKRISNCVA

RGPEQTQGNFGDQELIRQGTDYKHWPQIAQFAPSASAFFGMSRIGMEVTPSGTWLTYTGAIKLDDKDPNFK  
VDCALDPLSETKCTLSFTVEKGIYQTSNFRVQPTESIVRFPNITNLCPFGEVFNATRFASVYAWNRKRISNCVA

RGPEQTQGNFGDQELIRQGTDYKHWPQIAQFAPSASAFFGMSRIGMEVTPSGTWLTYTGAIKLDDKDPNFK  
VDCALDPLSETKCTLSFTVEKGIYQTSNFRVQPTESIVRFPNITNLCPFGEVFNATRFASVYAWNRKRISNCVA

RGPEQTQGNFGDQELIRQGTDYKHWPQIAQFAPSASAFFGMSRIGMEVTPSGTWLTYTGAIKLDDKDPNFK  
RGPEQTQGNFGDQELIRQGTDYKHWPQIAQFAPSASAFFGMSRIGMEVTPSGTWLTYTGAIKLDDKDPNFK  
VDCALDPLSETKCTLSFTVEKGIYQTSNFRVQPTESIVRFPNITNLCPFGEVFNATRFASVYAWNRKRISNCVA

RGPEQTQGNFGDQELIRQGTDYKHWPQIAQFAPSASAFFGMSRIGMEVTPSGTWLTYTGAIKLDDKDPNFK  
VDCALDPLSETKCTLSFTVEKGIYQTSNFRVQPTESIVRFPNITNLCPFGEVFNATRFASVYAWNRKRISNCVA

RGPEQTQGNFGDQELIRQGTDYKHWPQIAQFAPSASAFFGMSRIGMEVTPSGTWLTYTGAIKLDDKDPNFK

DYSVLYNSASFSTFKCYGVSPKLNLCFTNVYADSFVIRGDEVQRQIAPGQTGKIADYNYKLPDDFTGCVIAWN:

{DQVILLNKHIDAYKTFPPTPEPKDKKKKKADETQALPQRQKKQQTVTLLPAADLDDFSKQLQQSMSSADSTQA}  
DYSVLYNSASFSTFKCYGVSPKLNLCFTNVYADSFVIRGDEVQRQIAPGQTGKIADYNYKLPDDFTGCVIAWN:

{DQVILLNKHIDAYKTFPPTPEPKDKKKKKADETQALPQRQKKQQTVTLLPAADLDDFSKQLQQSMSSADSTQA}  
DYSVLYNSASFSTFKCYGVSPKLNLCFTNVYADSFVIRGDEVQRQIAPGQTGKIADYNYKLPDDFTGCVIAWN:

{DQVILLNKHIDAYKTFPPTPEPKDKKKKKADETQALPQRQKKQQTVTLLPAADLDDFSKQLQQSMSSADSTQA}

{DQVILLNKHIDAYKTFPPTPEPKDKKKKKADETQALPQRQKKQQTVTLLPAADLDDFSKQLQQSMSSADSTQA}  
DYSVLYNSASFSTFKCYGVSPKLNLCFTNVYADSFVIRGDEVQRQIAPGQTGKIADYNYKLPDDFTGCVIAWN:

{DQVILLNKHIDAYKTFPPTPEPKDKKKKKADETQALPQRQKKQQTVTLLPAADLDDFSKQLQQSMSSADSTQA}  
DYSVLYNSASFSTFKCYGVSPKLNLCFTNVYADSFVIRGDEVQRQIAPGQTGKIADYNYKLPDDFTGCVIAWN:

{DQVILLNKHIDAYKTFPPTPEPKDKKKKKADETQALPQRQKKQQTVTLLPAADLDDFSKQLQQSMSSADSTQA}  
{DQVILLNKHIDAYKTFPPTPEPKDKKKKKADETQALPQRQKKQQTVTLLPAADLDDFSKQLQQSMSSADSTQA}  
DYSVLYNSASFSTFKCYGVSPKLNLCFTNVYADSFVIRGDEVQRQIAPGQTGKIADYNYKLPDDFTGCVIAWN:

{DQVILLNKHIDAYKTFPPTEPKKDKKKKKADETQALPQRQKKQQTVTLLPAADLDDFSKQLQQSMSSADSTQA}  
DYSVLYNSASFSTFKCYGVSPTKLNLCFTNVYADSFVIRGDEVQRQIAPGQTGKIADYNYKLPDDFTGCVIAWN!

{DQVILLNKHIDAYKTFPPTEPKKDKKKKKADETQALPQRQKKQQTVTLLPAADLDDFSKQLQQSMSSADSTQA}  
DYSVLYNSASFSTFKCYGVSPTKLNLCFTNVYADSFVIRGDEVQRQIAPGQTGKIADYNYKLPDDFTGCVIAWN!

{DQVILLNKHIDAYKTFPPTEPKKDKKKKKADETQALPQRQKKQQTVTLLPAADLDDFSKQLQQSMSSADSTQA}  
DYSVLYNSASFSTFKCYGVSPTKLNLCFTNVYADSFVIRGDEVQRQIAPGQTGKIADYNYKLPDDFTGCVIAWN!

{DQVILLNKHIDAYKTFPPTEPKKDKKKKKADETQALPQRQKKQQTVTLLPAADLDDFSKQLQQSMSSADSTQA}  
{DQVILLNKHIDAYKTFPPTEPKKDKKKKKADETQALPQRQKKQQTVTLLPAADLDDFSKQLQQSMSSADSTQA}  
DYSVLYNSASFSTFKCYGVSPTKLNLCFTNVYADSFVIRGDEVQRQIAPGQTGKIADYNYKLPDDFTGCVIAWN!

{DQVILLNKHIDAYKTFPPTEPKKDKKKKKADETQALPQRQKKQQTVTLLPAADLDDFSKQLQQSMSSADSTQA}  
DYSVLYNSASFSTFKCYGVSPTKLNLCFTNVYADSFVIRGDEVQRQIAPGQTGKIADYNYKLPDDFTGCVIAWN!

{DQVILLNKHIDAYKTFPPTEPKKDKKKKKADETQALPQRQKKQQTVTLLPAADLDDFSKQLQQSMSSADSTQA}

SNNLDSKVGGNYNYLYRLFRKSNLKPFERDISTEIYQAGSTPCNGVEGFNCYFPLQSYGFQPTNGVGYQPVRVV

\*

SNNLDSKVGGNYNYLYRLFRKSNLKPFERDISTEIYQAGSTPCNGVEGFNCYFPLQSYGFQPTNGVGYQPVRVV

\*

SNNLDSKVGGNYNYLYRLFRKSNLKPFERDISTEIYQAGSTPCNGVEGFNCYFPLQSYGFQPTNGVGYQPVRVV

\*

\*

SNNLDSKVGGNYNYLYRLFRKSNLKPFERDISTEIYQAGSTPCNGVEGFNCYFPLQSYGFQPTNGVGYQPVRVV

\*

SNNLDSKVGGNYNYLYRLFRKSNLKPFERDISTEIYQAGSTPCNGVEGFNCYFPLQSYGFQPTNGVGYQPVRVV

\*

\*

SNNLDSKVGGNYNYLYRLFRKSNLKPFERDISTEIYQAGSTPCNGVEGFNCYFPLQSYGFQPTNGVGYQPVRVV

\*

SNNLDSKVGGNYNYLYRLFRKSNLKPFERDISTEIYQAGSTPCNGVEGFNCYFPLQSYGFQPTNGVGYQPVRVV

\*

SNNLDSKVGGNYNYLYRLFRKSNLKPFERDISTEIYQAGSTPCNGVEGFNCYFPLQSYGFQPTNGVGYQPVRVV

\*

SNNLDSKVGGNYNYLYRLFRKSNLKPFERDISTEIYQAGSTPCNGVEGFNCYFPLQSYGFQPTNGVGYQPVRVV

\*

\*

SNNLDSKVGGNYNYLYRLFRKSNLKPFERDISTEIYQAGSTPCNGVEGFNCYFPLQSYGFQPTNGVGYQPVRVV

\*

SNNLDSKVGGNYNYLYRLFRKSNLKPFERDISTEIYQAGSTPCNGVEGFNCYFPLQSYGFQPTNGVGYQPVRVV

\*

'VLSFELLHAPATVCGPKKSTNLVKNKCVNFNFNGLTGTGVLTESNKKFLPFQQFGRDIADTTDAVRDPQTLEILI

'VLSFELLHAPATVCGPKKSTNLVKNKCVNFNFNGLTGTGVLTESNKKFLPFQQFGRDIADTTDAVRDPQTLEILI

'VLSFELLHAPATVCGPKKSTNLVKNKCVNFNFNGLTGTGVLTESNKKFLPFQQFGRDIADTTDAVRDPQTLEILI

'VLSFELLHAPATVCGPKKSTNLVKNKCVNFNFNGLTGTGVLTESNKKFLPFQQFGRDIADTTDAVRDPQTLEILI

'VLSFELLHAPATVCGPKKSTNLVKNKCVNFNFNGLTGTGVLTESNKKFLPFQQFGRDIADTTDAVRDPQTLEILI

'VLSFELLHAPATVCGPKKSTNLVKNKCVNFNFNGLTGTGVLTESNKKFLPFQQFGRDIADTTDAVRDPQTLEILI



'VLSFELLHAPATVCGPKKSTNLVKNKCVNFNFNGLTGTGVLTESNKKFLPFQQFGRDIADTTDAVRDPQTLEILI

'VLSFELLHAPATVCGPKKSTNLVKNKCVNFNFNGLTGTGVLTESNKKFLPFQQFGRDIADTTDAVRDPQTLEILI

'VLSFELLHAPATVCGPKKSTNLVKNKCVNFNFNGLTGTGVLTESNKKFLPFQQFGRDIADTTDAVRDPQTLEILI

'VLSFELLHAPATVCGPKKSTNLVKNKCVNFNFNGLTGTGVLTESNKKFLPFQQFGRDIADTTDAVRDPQTLEILI

'VLSFELLHAPATVCGPKKSTNLVKNKCVNFNFNGLTGTGVLTESNKKFLPFQQFGRDIADTTDAVRDPQTLEILI

DITPCSFGGVSVITPGTNTSNQVAVLYQDVNCTEVPVAIHADQLTPTWRVYSTGSNVFQTRAGCLIGAEHVNN

ISYECDIPIGAGICASYQTQTNSPRRARSVASQSIIAYTMSLGAENSVAYSNNSIAIPTNFTISVTTEILPVSMTKTS

VDCTMYICGDSTECSNLLLQYGSFCTQLNRALTGIAVEQDKNTQEVFAQVKQIYKTPPIKDFGGFNFSQILPDPS

.KPSKRSFIEDLLFNKVTLADAGFIKQYGDCLGDIAARDLICAQKFNGLTVLPPLTDEMIAQYTSALLAGTITSGW

.KPSKRSFIEDLLFNKVTLADAGFIKQYGDCLGDIAARDLICAQKFNGLTVLPPLTDEMIAQYTSALLAGTITSGW

.KPSKRSFIEDLLFNKVTLADAGFIKQYGDCLGDIAARDLICAQKFNGLTVLPPLTDEMIAQYTSALLAGTITSGW

.KPSKRSFIEDLLFNKVTLADAGFIKQYGDCLGDIAARDLICAQKFNGLTVLPPLTDEMIAQYTSALLAGTITSGW

.KPSKRSFIEDLLFNKVTLADAGFIKQYGDCLGDIAARDLICAQKFNGLTVLPPLTDEMIAQYTSALLAGTITSGW

.KPSKRSFIEDLLFNKVTLADAGFIKQYGDCLGDIAARDLICAQKFNGLTVLPPLTDEMIAQYTSALLAGTITSGW



.KPSKRSFIEDLLFNKVTLADAGFIKQYGDCLGDIAARDLICAQKFNGLTVLPPLTDEMIAQYTSALLAGTITSGW

.KPSKRSFIEDLLFNKVTLADAGFIKQYGDCLGDIAARDLICAQKFNGLTVLPPLTDEMIAQYTSALLAGTITSGW

.KPSKRSFIEDLLFNKVTLADAGFIKQYGDCLGDIAARDLICAQKFNGLTVLPPLTDEMIAQYTSALLAGTITSGW

.KPSKRSFIEDLLFNKVTLADAGFIKQYGDCLGDIAARDLICAQKFNGLTVLPPLTDEMIAQYTSALLAGTITSGW

.KPSKRSFIEDLLFNKVTLADAGFIKQYGDCLGDIAARDLICAQKFNGLTVLPPLTDEMIAQYTSALLAGTITSGW

'TFGAGAALQIPFAMQMAYRFNGIGVTQNVLYENQKLIANQFNSAIGKIQDSLSSTASALGKLQDVVNQNAQ/

'TFGAGAALQIPFAMQMAYRFNGIGVTQNVLYENQKLIANQFNSAIGKIQDSLSSTASALGKLQDVVNQNAQ/

'TFGAGAALQIPFAMQMAYRFNGIGVTQNVLYENQKLIANQFNSAIGKIQDSLSSTASALGKLQDVVNQNAQ/

'TFGAGAALQIPFAMQMAYRFNGIGVTQNVLYENQKLIANQFNSAIGKIQDSLSSTASALGKLQDVVNQNAQ/

'TFGAGAALQIPFAMQMAYRFNGIGVTQNVLYENQKLIANQFNSAIGKIQDSLSSTASALGKLQDVVNQNAQ/

'TFGAGAALQIPFAMQMAYRFNGIGVTQNVLYENQKLIANQFNSAIGKIQDSLSSTASALGKLQDVVNQNAQ/

'TFGAGAALQIPFAMQMAYRFNGIGVTQNVLYENQKLIANQFNSAIGKIQDLSSTASALGKLQDVVNQNAQ/

'TFGAGAALQIPFAMQMAYRFNGIGVTQNVLYENQKLIANQFNSAIGKIQDLSSTASALGKLQDVVNQNAQ/

'TFGAGAALQIPFAMQMAYRFNGIGVTQNVLYENQKLIANQFNSAIGKIQDLSSTASALGKLQDVVNQNAQ/

'TFGAGAALQIPFAMQMAYRFNGIGVTQNVLYENQKLIANQFNSAIGKIQDLSSTASALGKLQDVVNQNAQ/

'TFGAGAALQIPFAMQMAYRFNGIGVTQNVLYENQKLIANQFNSAIGKIQDLSSTASALGKLQDVVNQNAQ/

ALNTLVKQLSSNFGAISSVLNDILSRDKVEAEVQIDRLITGRLQSLQTYVTQQLIRAAEIRASANL

ALNTLVKQLSSNFGAISSVLNDILSRDKVEAEVQIDRLITGRLQSLQTYVTQQLIRAAEIRASANL

ALNTLVKQLSSNFGAISSVLNDILSRDKVEAEVQIDRLITGRLQSLQTYVTQQLIRAAEIRASANL

ALNTLVKQLSSNFGAISSVLNDILSRDKVEAEVQIDRLITGRLQSLQTYVTQQLIRAAEIRASANL

ALNTLVKQLSSNFGAISSVLNDILSRDKVEAEVQIDRLITGRLQSLQTYVTQQLIRAAEIRASANL

ALNTLVKQLSSNFGAISSVLNDILSRDKVEAEVQIDRLITGRLQSLQTYVTQQLIRAAEIRASANL

\LNTLVKQLSSNFGAISSVLNDILSRDKVEAEVQIDRLITGRLQSLQTYVTQQLIRAAEIRASANL

\LNTLVKQLSSNFGAISSVLNDILSRDKVEAEVQIDRLITGRLQSLQTYVTQQLIRAAEIRASANL

\LNTLVKQLSSNFGAISSVLNDILSRDKVEAEVQIDRLITGRLQSLQTYVTQQLIRAAEIRASANL

\LNTLVKQLSSNFGAISSVLNDILSRDKVEAEVQIDRLITGRLQSLQTYVTQQLIRAAEIRASANL

\LNTLVKQLSSNFGAISSVLNDILSRDKVEAEVQIDRLITGRLQSLQTYVTQQLIRAAEIRASANL

|           | subgenome | leader_end | TRS_start | nb_count                                 | normalized_count |
|-----------|-----------|------------|-----------|------------------------------------------|------------------|
| Sample_1  | 1         | 70         | 2794      | 16(16,16,16,115.33(15.33,15.33,15.33,13  |                  |
|           | 2         | 74         | 21058     | 12(12,12,12,111.50(11.50,11.50,11.50,9.! |                  |
| Sample_2  | 1         | 67         | 25800     | 12(12,10,10,13.90(3.90,3.25,3.25,3.90)   |                  |
|           | 2         | 69         | 7503      | 34(34,34,34,3.11.06(11.06,11.06,11.06,11 |                  |
| Sample_3  | 3         | 48         | 26443     | 14(14,14,14,14.56(4.56,4.56,4.56,4.56)   |                  |
|           | 4         | 74         | 21058     | 50(48,50,48,4.16.27(15.62,16.27,15.62,15 |                  |
|           | 5         | 75         | 28265     | 11(11,11,11,11.3.58(3.58,3.58,3.58,2.60) |                  |
| Sample_4  | subgenome | leader_end | TRS_start | nb_count                                 | normalized_count |
| Sample_5  | subgenome | leader_end | TRS_start | nb_count                                 | normalized_count |
| Sample_6  | 1         | 48         | 26443     | 12(12,12,12,15.81(5.81,5.81,5.81,5.81)   |                  |
|           | 2         | 74         | 21058     | 14(14,14,14,16.78(6.78,6.78,6.78,5.81)   |                  |
| Sample_8  | 1         | 70         | 2794      | 42(42,42,42,4.19.37(19.37,19.37,19.37,18 |                  |
| Sample_9  | subgenome | leader_end | TRS_start | nb_count                                 | normalized_count |
| Sample_10 | 1         | 72         | 22107     | 13(7,6,0,12) 5.48(2.95,2.53,0.00,5.06)   |                  |
|           | 2         | 74         | 4555      | 16(16,16,16,16.75(6.75,6.75,6.75,5.90)   |                  |
|           | 3         | 74         | 21058     | 40(40,40,40,4.16.87(16.87,16.87,16.87,16 |                  |
|           | 4         | 63         | 5785      | 22(22,22,22,2.9.28(9.28,9.28,9.28,9.28)  |                  |
| Sample_12 | 1         | 67         | 4018      | 30(30,30,30,3.12.31(12.31,12.31,12.31,12 |                  |
|           | 2         | 68         | 4580      | 80(80,74,74,7.32.82(32.82,30.36,30.36,31 |                  |
| Sample_14 | 3         | 75         | 26486     | 40(40,40,40,3.16.41(16.41,16.41,16.41,15 |                  |
|           | 4         | 63         | 5785      | 28(28,26,26,2.11.49(11.49,10.67,10.67,10 |                  |
| Sample_17 |           |            |           |                                          |                  |
| Sample_18 |           |            |           |                                          |                  |
| Sample_19 |           |            |           |                                          |                  |

The numbers in the bracket are (reads with left primers, reads with right primers, reads with both primers, normalized count).  
Normalized count=(Read count/Total number of read mapped on reference genome)\*1000000.  
Total number of read mapped on reference genome is 1043447, 1313236, 3073041, 224581, 83  
“leader\_end” and “TRS\_start” refer to the position of the end of leader and the position of the s

1.42)  
58)

..06)

1.62)

1.45)

1.87)

1.31)

..18)

1.59)

1.67)

th primers, same junction on paired reads with at least a primer).

2781, 2065846, 2167817, 98346, 1411813, 2371630, 2350539, 2437210, 121985, 1238012 and 7  
start of TRS identified in the reads >10.

'67034, excluding the mapped reads unpaired, not primary alignment and supplementary alignm



ient.

|           | subgenome | leader_end | TRS_start | ACGAAC | ATG_postion | known_ATG |
|-----------|-----------|------------|-----------|--------|-------------|-----------|
| Sample_1  | 1         | 70         | 2794      | no     | 2802        | -         |
|           | 2         | 74         | 21058     | no     | 21071       | -         |
| Sample_2  | 1         | 67         | 25800     | no     | 25814       | -         |
|           | 2         | 69         | 7503      | no     | 7531        | -         |
| Sample_3  | 3         | 48         | 26443     | yes    | 26523       | M         |
|           | 4         | 74         | 21058     | no     | 21071       | -         |
|           | 5         | 75         | 28265     | no     | 28274       | N         |
| Sample_4  |           |            |           |        |             |           |
| Sample_5  |           |            |           |        |             |           |
| Sample_6  | 1         | 48         | 26443     | yes    | 26523       | M         |
|           | 2         | 74         | 21058     | no     | 21071       | -         |
| Sample_8  |           |            |           |        |             |           |
| Sample_9  | 1         | 70         | 2794      | no     | 2802        | -         |
| Sample_10 |           |            |           |        |             |           |
| Sample_11 | 1         | 72         | 22107     | no     | 22155       | -         |
|           | 2         | 74         | 4555      | no     | 4590        | -         |
|           | 3         | 74         | 21058     | no     | 21071       | -         |
|           | 4         | 63         | 5785      | no     | 5859        | -         |
| Sample_12 |           |            |           |        |             |           |
| Sample_14 | 1         | 67         | 4018      | no     | 4044        | -         |
|           | 2         | 68         | 4580      | no     | 4590        | -         |
|           | 3         | 75         | 26486     | no     | 26523       | M         |
|           | 4         | 63         | 5785      | no     | 5859        | -         |
| Sample_17 |           |            |           |        |             |           |
| Sample_18 |           |            |           |        |             |           |
| Sample_19 |           |            |           |        |             |           |

“peak\_leader” and “peak\_TRS\_start” point to the leader-TRS junctions in sheet "novel", “ACGAA

20\_leader\_se TRS\_seq first\_orf\_aa  
TTGTAGATCT TGAACCTG MKGLIKYLMRSALPIQLNSVQK\*  
AGATCTGTTT CCTAAGACTA MLQKKMTLKRVSFLTFVGLYNKS\*

CTCTTG TAGA AAACCCATTA MMPTIFFAGILIVTTIVYLTIV\*  
CTTG TAGATC ACAAACGTA MYNYC\*  
AAACCAACCA TCTTCTAGAG MADSNGTITVEELKKLLEQWNLVIGFLFTWICLLQFAYANRRNFLYIIKLIFLM  
AGATCTGTTT CCTAAGACTA MLQKKMTLKRVSFLTFVGLYNKS\*  
GATCTGTTCT CAAACTAAA MSDNGPQNQRNAPRITFGGSDSTGSNQNNGERSGARSKQRRPQGLPNNT,

AAACCAACCA TCTTCTAGAG MADSNGTITVEELKKLLEQWNLVIGFLFTWICLLQFAYANRRNFLYIIKLIFLM  
AGATCTGTTT CCTAAGACTA MLQKKMTLKRVSFLTFVGLYNKS\*

TTGTAGATCT TGAACCTG MKGLIKYLMRSALPIQLNSVQK\*

G TAGATCTGT AACAGGGTA MVILKYILSTRLLI\*  
AGATCTGTTT TG TAGCGTCA MKLLLQCHLAM\*  
AGATCTGTTT CCTAAGACTA MLQKKMTLKRVSFLTFVGLYNKS\*  
CGATCTCTTG TTCTAAAGAA MFSTKKTVTQQP\*

CTCTTG TAGA AAACCTGTTA MAIFIQILPLLLVTLTSL\*  
TCTTG TAGAT AACGATCTAA MKLLLQCHLAM\*  
GATCTGTTCT TATATTAGTT MADSNGTITVEELKKLLEQWNLVIGFLFTWICLLQFAYANRRNFLYIIKLIFLM  
CGATCTCTTG TTCTAAAGAA MFSTKKTVTQQP\*

“C” indicates if there is a ACGAAC sequences in the “TRS\_seq” (TRS sequences), “20\_leader\_seq”

/LLWPVTLACFVLAAYRINWITGGIAIAMAACLVGLMWLSYFIASFRLFARTRSMWSFNPETNILLNVPLHGTIL

ASWFTALTQHGKEDLKFRGQGVPIINTNSSPDDQIGYRRATRRIRGGDGKMKDLSRWFYFYLLGTGPEAGLI

/LLWPVTLACFVLAAYRINWITGGIAIAMAACLVGLMWLSYFIASFRLFARTRSMWSFNPETNILLNVPLHGTIL

/LLWPVTLACFVLAAYRINWITGGIAIAMAACLVGLMWLSYFIASFRLFARTRSMWSFNPETNILLNVPLHGTIL

refers to the 20 sequences before the end of the leader, "AUG\_postion" and "first\_orf\_aa" refer

TRP LLESELVIGAVILRGHLRIAGHHLGRCDIKDLPKEITVATSRTL SYYKLGASQRVAGDSGFAAYSRYRIGNYKLI

PYGANKDGIIWVATEGALNTPKDHIGTRNPANNA AIVLQLPQGTTLPKGFYAEGSRGGSQASSR SSSRSRNSSF

TRP LLESELVIGAVILRGHLRIAGHHLGRCDIKDLPKEITVATSRTL SYYKLGASQRVAGDSGFAAYSRYRIGNYKLI

TRP LLESELVIGAVILRGHLRIAGHHLGRCDIKDLPKEITVATSRTL SYYKLGASQRVAGDSGFAAYSRYRIGNYKLI

· to the first AUG position and translated orf of the sgmRNA, and “known\_ATG” indicates if the fi

NTDHSSSSDNIALLVQ\*

{NSTPGSSRGTS PARMAGNGGDAALALLLDRLNQLESKMSGKGQQQGQTVTKKSAAEASKKPRQKRTAT}

NTDHSSSSDNIALLVQ\*

NTDHSSSSDNIALLVQ\*

rst AUG position is the same as a known sgmRNA.

◁AYNVTQAFGRRGPEQTQGNFGDQELIRQGTDYKHWPQIAQFAPSASAFFGMSRIGMEVTPSGTWLTYTGA

.IKLDDKDPNFKDQVILLNKHIDAYKTFPPTPEPKKDKKKKADETQALPQRQKKQQTVLLPAADLDDFSKQLQQ:



SMSSADSTQA\*



|         | subgenome | ref_leader_ei | peak_leader_ref_TRS_start | peak_TRS_start |       |
|---------|-----------|---------------|---------------------------|----------------|-------|
| S1-Day1 | S         | 65            | 0                         | 21552          | 0     |
|         | ORF3a     | 69            | 0                         | 25385          | 0     |
|         | E         | 69            | 0                         | 26237          | 0     |
|         | M         | 65            | 65                        | 26469          | 26469 |
|         | ORF6      | 69            | 0                         | 27041          | 0     |
|         | ORF7a     | 69            | 69                        | 27388          | 27388 |
|         | ORF7b     | 65            | 0                         | 27644          | 0     |
|         | ORF8      | 65            | 0                         | 27884          | 0     |
|         | N         | 65            | 65                        | 28256          | 28256 |
|         | ORF10     | 65            | 0                         | 29530          | 0     |
| S2-Day2 | S         | 65            | 0                         | 21552          | 0     |
|         | ORF3a     | 69            | 69                        | 25385          | 25385 |
|         | E         | 69            | 0                         | 26237          | 0     |
|         | M         | 65            | 64                        | 26469          | 26468 |
|         | ORF6      | 69            | 0                         | 27041          | 0     |
|         | ORF7a     | 69            | 69                        | 27388          | 27388 |
|         | ORF7b     | 65            | 0                         | 27644          | 0     |
|         | ORF8      | 65            | 65                        | 27884          | 27884 |
|         | N         | 65            | 64                        | 28256          | 28255 |
|         | ORF10     | 65            | 0                         | 29530          | 0     |
| S3-Day3 | S         | 65            | 65                        | 21552          | 21552 |
|         | ORF3a     | 69            | 69                        | 25385          | 25385 |
|         | E         | 69            | 69                        | 26237          | 26237 |
|         | M         | 65            | 64                        | 26469          | 26468 |
|         | ORF6      | 69            | 69                        | 27041          | 27041 |
|         | ORF7a     | 69            | 69                        | 27388          | 27388 |
|         | ORF7b     | 65            | 65                        | 27644          | 27644 |
|         | ORF8      | 65            | 65                        | 27884          | 27884 |
|         | N         | 65            | 64                        | 28256          | 28255 |
|         | ORF10     | 65            | 0                         | 29530          | 0     |
| S1-Day4 | S         | 65            | 65                        | 21552          | 21552 |
|         | ORF3a     | 69            | 69                        | 25385          | 25385 |
|         | E         | 69            | 69                        | 26237          | 26237 |
|         | M         | 65            | 65                        | 26469          | 26469 |
|         | ORF6      | 69            | 69                        | 27041          | 27041 |
|         | ORF7a     | 69            | 69                        | 27388          | 27388 |
|         | ORF7b     | 65            | 65                        | 27644          | 27644 |
|         | ORF8      | 65            | 65                        | 27884          | 27884 |
|         | N         | 65            | 64                        | 28256          | 28255 |
|         | ORF10     | 65            | 0                         | 29530          | 0     |
|         | S         | 65            | 65                        | 21552          | 21552 |
|         | ORF3a     | 69            | 69                        | 25385          | 25385 |

|          |       |    |    |       |       |
|----------|-------|----|----|-------|-------|
| S2-Day5  | E     | 69 | 0  | 26237 | 0     |
|          | M     | 65 | 65 | 26469 | 26469 |
|          | ORF6  | 69 | 0  | 27041 | 0     |
|          | ORF7a | 69 | 0  | 27388 | 0     |
|          | ORF7b | 65 | 0  | 27644 | 0     |
|          | ORF8  | 65 | 0  | 27884 | 0     |
|          | N     | 65 | 65 | 28256 | 28256 |
|          | ORF10 | 65 | 0  | 29530 | 0     |
|          | S     | 65 | 65 | 21552 | 21552 |
|          | ORF3a | 69 | 69 | 25385 | 25385 |
| S3-Day6  | E     | 69 | 0  | 26237 | 0     |
|          | M     | 65 | 65 | 26469 | 26469 |
|          | ORF6  | 69 | 69 | 27041 | 27041 |
|          | ORF7a | 69 | 69 | 27388 | 27388 |
|          | ORF7b | 65 | 65 | 27644 | 27644 |
|          | ORF8  | 65 | 65 | 27884 | 27884 |
|          | N     | 65 | 63 | 28256 | 28254 |
|          | ORF10 | 65 | 0  | 29530 | 0     |
|          | S     | 65 | 0  | 21552 | 0     |
|          | ORF3a | 69 | 0  | 25385 | 0     |
| S2-Day8  | E     | 69 | 0  | 26237 | 0     |
|          | M     | 65 | 0  | 26469 | 0     |
|          | ORF6  | 69 | 0  | 27041 | 0     |
|          | ORF7a | 69 | 69 | 27388 | 27388 |
|          | ORF7b | 65 | 0  | 27644 | 0     |
|          | ORF8  | 65 | 0  | 27884 | 0     |
|          | N     | 65 | 65 | 28256 | 28256 |
|          | ORF10 | 65 | 0  | 29530 | 0     |
|          | S     | 65 | 0  | 21552 | 0     |
|          | ORF3a | 69 | 0  | 25385 | 0     |
| S3-Day9  | E     | 69 | 0  | 26237 | 0     |
|          | M     | 65 | 0  | 26469 | 0     |
|          | ORF6  | 69 | 69 | 27041 | 27041 |
|          | ORF7a | 69 | 0  | 27388 | 0     |
|          | ORF7b | 65 | 0  | 27644 | 0     |
|          | ORF8  | 65 | 0  | 27884 | 0     |
|          | N     | 65 | 65 | 28256 | 28256 |
|          | ORF10 | 65 | 0  | 29530 | 0     |
|          | S     | 65 | 0  | 21552 | 0     |
|          | ORF3a | 69 | 0  | 25385 | 0     |
| S2-Day11 | E     | 69 | 0  | 26237 | 0     |
|          | M     | 65 | 65 | 26469 | 26469 |
|          | ORF6  | 69 | 69 | 27041 | 27041 |

|          |       |    |    |       |       |
|----------|-------|----|----|-------|-------|
| S2-Day11 | ORF7a | 69 | 0  | 27388 | 0     |
|          | ORF7b | 65 | 65 | 27644 | 27644 |
|          | ORF8  | 65 | 0  | 27884 | 0     |
|          | N     | 65 | 64 | 28256 | 28255 |
|          | ORF10 | 65 | 0  | 29530 | 0     |
|          | S     | 65 | 0  | 21552 | 0     |
|          | ORF3a | 69 | 0  | 25385 | 0     |
|          | E     | 69 | 0  | 26237 | 0     |
|          | M     | 65 | 65 | 26469 | 26469 |
|          | ORF6  | 69 | 0  | 27041 | 0     |
| S3-Day12 | ORF7a | 69 | 0  | 27388 | 0     |
|          | ORF7b | 65 | 0  | 27644 | 0     |
|          | ORF8  | 65 | 0  | 27884 | 0     |
|          | N     | 65 | 65 | 28256 | 28256 |
|          | ORF10 | 65 | 0  | 29530 | 0     |
|          | S     | 65 | 0  | 21552 | 0     |
|          | ORF3a | 69 | 69 | 25385 | 25385 |
|          | E     | 69 | 0  | 26237 | 0     |
|          | M     | 65 | 0  | 26469 | 0     |
|          | ORF6  | 69 | 0  | 27041 | 0     |
| S3-Day19 | ORF7a | 69 | 0  | 27388 | 0     |
|          | ORF7b | 65 | 0  | 27644 | 0     |
|          | ORF8  | 65 | 0  | 27884 | 0     |
|          | N     | 65 | 0  | 28256 | 0     |
|          | ORF10 | 65 | 0  | 29530 | 0     |
|          |       |    |    |       |       |

The numbers in the bracket are (reads with left primers, reads with right primers, read  
Normalized count=(Read count/Total number of read mapped on reference genome)\*  
Total number of read mapped on reference genome is 32903734, 33694953, 3340048  
“ref\_leader\_end” and “peak\_leader\_end” point to the reference position of the end o

| peak_count                     | peak_normalized_count              | cluster_count                  |
|--------------------------------|------------------------------------|--------------------------------|
| 0                              | 0                                  | 0                              |
| 0                              | 0                                  | 0                              |
| 0                              | 0                                  | 0                              |
| 196(195,194,193,190)           | 5.96(5.93,5.90,5.87,5.77)          | 204(203,202,201,196)           |
| 0                              | 0                                  | 0                              |
| 1(1,0,0,0)                     | 0.03(0.03,0.00,0.00,0.00)          | 1(1,0,0,0)                     |
| 0                              | 0                                  | 0                              |
| 0                              | 0                                  | 0                              |
| 20(8,20,8,8)                   | 0.61(0.24,0.61,0.24,0.24)          | 22(10,22,10,10)                |
| 0                              | 0                                  | 0                              |
| 0                              | 0                                  | 0                              |
| 1382(1368,0,0,30)              | 41.02(40.60,0.00,0.00,0.89)        | 1388(1374,0,0,30)              |
| 0                              | 0                                  | 0                              |
| 6874(6868,6701,6697,6852)      | 204.01(203.83,198.87,198.75,203.8) | 8414(8402,8188,8179,8342)      |
| 0                              | 0                                  | 0                              |
| 259(13,256,10,32)              | 7.69(0.39,7.60,0.30,0.95)          | 259(13,256,10,32)              |
| 0                              | 0                                  | 0                              |
| 12(12,0,0,0)                   | 0.36(0.36,0.00,0.00,0.00)          | 12(12,0,0,0)                   |
| 2463(2457,2436,2430,2438)      | 73.10(72.92,72.30,72.12,72.36)     | 3884(3874,3838,3828,3818)      |
| 0                              | 0                                  | 0                              |
| 5259(5236,3453,3442,3664)      | 157.45(156.76,103.38,103.05,109.5) | 5347(5323,3498,3486,3674)      |
| 2548(2490,0,0,42)              | 76.29(74.55,0.00,0.00,1.26)        | 2681(2620,0,0,46)              |
| 2824(2797,4,4,32)              | 84.55(83.74,0.12,0.12,0.96)        | 2825(2798,4,4,32)              |
| 9355(9343,8993,8984,9280)      | 280.09(279.73,269.25,268.98,277.7) | 10837(10820,10377,10367,10677) |
| 2893(2876,2560,2550,2612)      | 86.62(86.11,76.65,76.35,78.20)     | 2976(2959,2635,2625,2672)      |
| 61(50,15,4,4)                  | 1.83(1.50,0.45,0.12,0.12)          | 62(51,15,4,4)                  |
| 2(2,0,0,0)                     | 0.06(0.06,0.00,0.00,0.00)          | 2(2,0,0,0)                     |
| 183(183,0,0,4)                 | 5.48(5.48,0.00,0.00,0.12)          | 183(183,0,0,4)                 |
| 22082(22010,21900,21853,21800) | 661.13(658.97,655.68,654.27,654.1) | 23693(23612,23459,23404,23250) |
| 0                              | 0                                  | 0                              |
| 4751(4736,3166,3155,2084)      | 145.35(144.89,96.86,96.52,63.76)   | 6150(6127,4390,4373,2128)      |
| 1431(1414,0,0,26)              | 43.78(43.26,0.00,0.00,0.80)        | 1435(1418,0,0,26)              |
| 4766(4753,0,0,26)              | 145.81(145.41,0.00,0.00,0.80)      | 4768(4754,0,0,26)              |
| 2267(2264,2170,2170,2194)      | 69.36(69.26,66.39,66.39,67.12)     | 2347(2344,2247,2247,2262)      |
| 5600(5576,5275,5252,5312)      | 171.32(170.59,161.38,160.68,162.1) | 5638(5614,5311,5288,5334)      |
| 26(25,3,2,4)                   | 0.80(0.76,0.09,0.06,0.12)          | 26(25,3,2,4)                   |
| 2(2,0,0,2)                     | 0.06(0.06,0.00,0.00,0.06)          | 2(2,0,0,2)                     |
| 140(135,0,0,0)                 | 4.28(4.13,0.00,0.00,0.00)          | 140(135,0,0,0)                 |
| 31082(31046,30667,30631,30700) | 950.90(949.80,938.21,937.11,940.1) | 32535(32488,32095,32048,31900) |
| 0                              | 0                                  | 0                              |
| 1(1,0,0,0)                     | 0.06(0.06,0.00,0.00,0.00)          | 1(1,0,0,0)                     |
| 94(91,0,0,0)                   | 5.51(5.34,0.00,0.00,0.00)          | 95(92,0,0,0)                   |

|                              |                                    |                             |
|------------------------------|------------------------------------|-----------------------------|
| 0                            | 0                                  | 0                           |
| 2(2,2,2,2)                   | 0.12(0.12,0.12,0.12,0.12)          | 2(2,2,2,2)                  |
| 0                            | 0                                  | 0                           |
| 0                            | 0                                  | 0                           |
| 0                            | 0                                  | 0                           |
| 0                            | 0                                  | 0                           |
| 12(2,12,2,2)                 | 0.70(0.12,0.70,0.12,0.12)          | 16(4,16,4,6)                |
| 0                            | 0                                  | 0                           |
| 8903(8893,7853,7843,8088)    | 270.90(270.60,238.95,238.65,246.1) | 8960(8950,7896,7886,8092)   |
| 2718(2687,0,0,42)            | 82.70(81.76,0.00,0.00,1.28)        | 2747(2695,0,0,42)           |
| 0                            | 0                                  | 0                           |
| 340(340,328,328,324)         | 10.35(10.35,9.98,9.98,9.86)        | 428(427,411,410,398)        |
| 7227(7210,6907,6890,6968)    | 219.90(219.39,210.17,209.65,212.1) | 7257(7240,6937,6920,6978)   |
| 43(38,12,7,18)               | 1.31(1.16,0.37,0.21,0.55)          | 43(38,12,7,18)              |
| 1(1,0,0,0)                   | 0.03(0.03,0.00,0.00,0.00)          | 1(1,0,0,0)                  |
| 41(41,0,0,0)                 | 1.25(1.25,0.00,0.00,0.00)          | 41(41,0,0,0)                |
| 36127(36101,35933,35908,348) | 1099.28(1098.49,1093.37,1092.61,   | 64772(64692,64000,63922,617 |
| 0                            | 0                                  | 0                           |
| 0                            | 0                                  | 0                           |
| 0                            | 0                                  | 0                           |
| 0                            | 0                                  | 0                           |
| 0                            | 0                                  | 0                           |
| 0                            | 0                                  | 0                           |
| 10(9,1,0,2)                  | 0.74(0.67,0.07,0.00,0.15)          | 10(9,1,0,2)                 |
| 0                            | 0                                  | 0                           |
| 0                            | 0                                  | 0                           |
| 4(2,4,2,2)                   | 0.30(0.15,0.30,0.15,0.15)          | 4(2,4,2,2)                  |
| 0                            | 0                                  | 0                           |
| 0                            | 0                                  | 0                           |
| 0                            | 0                                  | 0                           |
| 0                            | 0                                  | 0                           |
| 0                            | 0                                  | 0                           |
| 8006(7996,7805,7795,7796)    | 501.90(501.27,489.30,488.67,488.1) | 8025(8015,7824,7814,7796)   |
| 0                            | 0                                  | 0                           |
| 0                            | 0                                  | 0                           |
| 0                            | 0                                  | 0                           |
| 4(2,4,2,2)                   | 0.25(0.13,0.25,0.13,0.13)          | 4(2,4,2,2)                  |
| 0                            | 0                                  | 0                           |
| 0                            | 0                                  | 0                           |
| 0                            | 0                                  | 0                           |
| 0                            | 0                                  | 0                           |
| 2(2,2,2,2)                   | 0.20(0.20,0.20,0.20,0.20)          | 2(2,2,2,2)                  |
| 41847(41781,41584,41518,410) | 4230.09(4223.42,4203.50,4196.83,   | 41993(41927,41730,41664,410 |

|                                                                                         |                           |            |
|-----------------------------------------------------------------------------------------|---------------------------|------------|
| 0                                                                                       | 0                         | 0          |
| 1(1,0,0,0)                                                                              | 0.10(0.10,0.00,0.00,0.00) | 1(1,0,0,0) |
| 0                                                                                       | 0                         | 0          |
| 210234(210002,209510,209285,21251.43(21227.97,21178.24,2115215169(214896,214384,214111) |                           |            |
| 0                                                                                       | 0                         | 0          |
| 0                                                                                       | 0                         | 0          |
| 0                                                                                       | 0                         | 0          |
| 0                                                                                       | 0                         | 0          |
| 1(1,0,0,0)                                                                              | 0.07(0.07,0.00,0.00,0.00) | 1(1,0,0,0) |
| 0                                                                                       | 0                         | 0          |
| 0                                                                                       | 0                         | 0          |
| 0                                                                                       | 0                         | 0          |
| 0                                                                                       | 0                         | 0          |
| 2(2,2,2,2)                                                                              | 0.14(0.14,0.14,0.14,0.14) | 2(2,2,2,2) |
| 0                                                                                       | 0                         | 0          |
| 0                                                                                       | 0                         | 0          |
| 1(0,0,0,0)                                                                              | 0.06(0.00,0.00,0.00,0.00) | 1(0,0,0,0) |
| 0                                                                                       | 0                         | 0          |
| 0                                                                                       | 0                         | 0          |
| 0                                                                                       | 0                         | 0          |
| 0                                                                                       | 0                         | 0          |
| 0                                                                                       | 0                         | 0          |
| 0                                                                                       | 0                         | 0          |
| 0                                                                                       | 0                         | 0          |
| 0                                                                                       | 0                         | 0          |

Is with both primers, same junction on paired reads with at least a primer).

1000000.

5, 32686824, 17052923, 32864351, 13447115, 15951471, 9892701, 13862861, 12570298 and 1565  
of leader and the position of the end of leader identified in the most common reads (peak count) or

cluster\_normalized\_count  
0  
0  
0  
6.20(6.17,6.14,6.11,5.96)  
0  
0.03(0.03,0.00,0.00,0.00)  
0  
0  
0.67(0.30,0.67,0.30,0.30)  
0  
0  
41.19(40.78,0.00,0.00,0.89)  
0  
249.71(249.35,243.00,242.74,247.57)  
0  
7.69(0.39,7.60,0.30,0.95)  
0  
0.36(0.36,0.00,0.00,0.00)  
115.27(114.97,113.90,113.61,113.31)  
0  
160.09(159.37,104.73,104.37,110.00)  
80.27(78.44,0.00,0.00,1.38)  
84.58(83.77,0.12,0.12,0.96)  
324.46(323.95,310.68,310.38,318.44)  
89.10(88.59,78.89,78.59,80.00)  
1.86(1.53,0.45,0.12,0.12)  
0.06(0.06,0.00,0.00,0.00)  
5.48(5.48,0.00,0.00,0.12)  
709.36(706.94,702.36,700.71,695.68)  
0  
188.15(187.45,134.30,133.78,65.10)  
43.90(43.38,0.00,0.00,0.80)  
145.87(145.44,0.00,0.00,0.80)  
71.80(71.71,68.74,68.74,69.20)  
172.49(171.75,162.48,161.78,163.19)  
0.80(0.76,0.09,0.06,0.12)  
0.06(0.06,0.00,0.00,0.06)  
4.28(4.13,0.00,0.00,0.00)  
995.36(993.92,981.89,980.46,976.17)  
0  
0.06(0.06,0.00,0.00,0.00)  
5.57(5.39,0.00,0.00,0.00)



0  
0.12(0.12,0.12,0.12,0.12)  
0  
0  
0  
0  
0.94(0.23,0.94,0.23,0.35)  
0  
272.64(272.33,240.26,239.96,246.22)  
83.59(82.00,0.00,0.00,1.28)  
0  
13.02(12.99,12.51,12.48,12.11)  
220.82(220.30,211.08,210.56,212.33)  
1.31(1.16,0.37,0.21,0.55)  
0.03(0.03,0.00,0.00,0.00)  
1.25(1.25,0.00,0.00,0.00)  
1970.89(1968.46,1947.40,1945.03,1880.15)  
0  
0  
0  
0  
0  
0  
0  
0.74(0.67,0.07,0.00,0.15)  
0  
0  
0.30(0.15,0.30,0.15,0.15)  
0  
0  
0  
0  
0  
0  
503.09(502.46,490.49,489.86,488.73)  
0  
0  
0  
0.25(0.13,0.25,0.13,0.13)  
0  
0  
0  
0  
0.20(0.20,0.20,0.20,0.20)  
4244.85(4238.18,4218.26,4211.59,4149.73)

0  
0.10(0.10,0.00,0.00,0.00)  
0  
21750.28(21722.68,21670.93,21644.14,21514.85)  
0  
0  
0  
0  
0.07(0.07,0.00,0.00,0.00)  
0  
0  
0  
0  
0.14(0.14,0.14,0.14,0.14)  
0  
0  
0.06(0.00,0.00,0.00,0.00)  
0  
0  
0  
0  
0  
0  
0  
0

53045, excluding the mapped reads unpaired, not primary alignment and supplementary alignment.  
1 the reference genome, and "ref\_TRS\_start" and "peak\_TRS\_start" refer to the reference position of t





the start of TRS and the position of the start of TRS identified in the most common reads (peak cc





ount) on the reference genome.



|         | subgenome | ref_leader_ei | peak_leader_ref | TRS_start | TRS_start    | peak_count    |
|---------|-----------|---------------|-----------------|-----------|--------------|---------------|
| S1-Day1 | S         | 65            | 65              | 21552     | 21552        | 2928(2926,21  |
|         | ORF3a     | 69            | 69              | 25385     | 25385        | 578(573,0,0,1 |
|         | E         | 69            | 69              | 26237     | 26237        | 2276(2273,2,  |
|         | M         | 65            | 65              | 26469     | 26469        | 607(607,555,  |
|         | ORF6      | 69            | 0               | 27041     | 0            | 0             |
|         | ORF7a     | 69            | 0               | 27388     | 0            | 0             |
|         | ORF7b     | 65            | 0               | 27644     | 0            | 0             |
|         | ORF8      | 65            | 0               | 27884     | 0            | 0             |
|         | N         | 65            | 64              | 28256     | 28255        | 3772(3770,37  |
|         | ORF10     | 65            | 0               | 29530     | 0            | 0             |
| S2-Day2 | S         | 65            | 65              | 21552     | 21552        | 5529(5523,45  |
|         | ORF3a     | 69            | 69              | 25385     | 25385        | 1176(1168,0,  |
|         | E         | 69            | 69              | 26237     | 26237        | 2138(2133,4,  |
|         | M         | 65            | 64              | 26469     | 26468        | 4176(4172,39  |
|         | ORF6      | 69            | 69              | 27041     | 27041        | 2267(2265,21  |
|         | ORF7a     | 69            | 69              | 27388     | 27388        | 12(9,5,2,6)   |
|         | ORF7b     | 65            | 0               | 27644     | 0            | 0             |
|         | ORF8      | 65            | 0               | 27884     | 0            | 0             |
|         | N         | 65            | 64              | 28256     | 28255        | 29251(29214   |
|         | ORF10     | 65            | 0               | 29530     | 0            | 0             |
| S3-Day3 | S         | 65            | 65              | 21552     | 21552        | 1191(1189,90  |
|         | ORF3a     | 69            | 69              | 25385     | 25385        | 326(321,0,0,1 |
|         | E         | 69            | 0               | 26237     | 0            | 0             |
|         | M         | 65            | 65              | 26469     | 26469        | 1170(1170,10  |
|         | ORF6      | 69            | 69              | 27041     | 27041        | 647(647,592,  |
|         | ORF7a     | 69            | 69              | 27388     | 27388        | 7(6,1,0,0)    |
|         | ORF7b     | 65            | 0               | 27644     | 0            | 0             |
|         | ORF8      | 65            | 65              | 27884     | 27884        | 15(15,0,0,0)  |
|         | N         | 65            | 64              | 28256     | 28255        | 4046(4042,40  |
|         | ORF10     | 65            | 0               | 29530     | 0            | 0             |
| S1-Day4 | S         | 65            | 65              | 21552     | 21552        | 2958(2951,25  |
|         | ORF3a     | 69            | 69              | 25385     | 25385        | 100(98,0,0,2) |
|         | E         | 69            | 0               | 26237     | 0            | 0             |
|         | M         | 65            | 65              | 26469     | 26469        | 5063(5061,49  |
|         | ORF6      | 69            | 69              | 27041     | 27041        | 4627(4620,44  |
|         | ORF7a     | 69            | 69              | 27388     | 27388        | 9(8,1,0,0)    |
|         | ORF7b     | 65            | 65              | 27644     | 27644        | 1(1,0,0,0)    |
|         | ORF8      | 65            | 65              | 27884     | 27884        | 8(8,0,0,0)    |
|         | N         | 65            | 64              | 28256     | 28255        | 30869(30831   |
|         | ORF10     | 65            | 0               | 29530     | 0            | 0             |
| S       | 65        | 65            | 21552           | 21552     | 6764(6763,61 |               |
| ORF3a   | 69        | 0             | 25385           | 0         | 0            |               |

|          |       |    |    |       |       |                   |
|----------|-------|----|----|-------|-------|-------------------|
| S2-Day5  | E     | 69 | 0  | 26237 | 0     | 0                 |
|          | M     | 65 | 65 | 26469 | 26469 | 2376(2376,2376)   |
|          | ORF6  | 69 | 0  | 27041 | 0     | 0                 |
|          | ORF7a | 69 | 0  | 27388 | 0     | 0                 |
|          | ORF7b | 65 | 65 | 27644 | 27644 | 2(2,0,0,2)        |
|          | ORF8  | 65 | 0  | 27884 | 0     | 0                 |
|          | N     | 65 | 68 | 28256 | 28263 | 36092(36037)      |
|          | ORF10 | 65 | 0  | 29530 | 0     | 0                 |
|          | S     | 65 | 65 | 21552 | 21552 | 2400(2399,2400)   |
|          | ORF3a | 69 | 69 | 25385 | 25385 | 1122(1108,0,1122) |
| S3-Day6  | E     | 69 | 69 | 26237 | 26237 | 2721(2716,6,2721) |
|          | M     | 65 | 64 | 26469 | 26468 | 8639(8632,8639)   |
|          | ORF6  | 69 | 69 | 27041 | 27041 | 4390(4378,41)     |
|          | ORF7a | 69 | 69 | 27388 | 27388 | 29(17,12,0,14)    |
|          | ORF7b | 65 | 0  | 27644 | 0     | 0                 |
|          | ORF8  | 65 | 65 | 27884 | 27884 | 29(29,0,0,0)      |
|          | N     | 65 | 65 | 28256 | 28256 | 6048(6022,59)     |
|          | ORF10 | 65 | 0  | 29530 | 0     | 0                 |
|          | S     | 65 | 0  | 21552 | 0     | 0                 |
|          | ORF3a | 69 | 69 | 25385 | 25385 | 286(283,0,0,2)    |
| S2-Day8  | E     | 69 | 0  | 26237 | 0     | 0                 |
|          | M     | 65 | 0  | 26469 | 0     | 0                 |
|          | ORF6  | 69 | 0  | 27041 | 0     | 0                 |
|          | ORF7a | 69 | 69 | 27388 | 27388 | 12(10,2,0,8)      |
|          | ORF7b | 65 | 0  | 27644 | 0     | 0                 |
|          | ORF8  | 65 | 0  | 27884 | 0     | 0                 |
|          | N     | 65 | 65 | 28256 | 28256 | 68(7,68,7,26)     |
|          | ORF10 | 65 | 0  | 29530 | 0     | 0                 |
|          | S     | 65 | 0  | 21552 | 0     | 0                 |
|          | ORF3a | 69 | 0  | 25385 | 0     | 0                 |
| S3-Day9  | E     | 69 | 0  | 26237 | 0     | 0                 |
|          | M     | 65 | 65 | 26469 | 26469 | 92(91,90,89,92)   |
|          | ORF6  | 69 | 0  | 27041 | 0     | 0                 |
|          | ORF7a | 69 | 0  | 27388 | 0     | 0                 |
|          | ORF7b | 65 | 0  | 27644 | 0     | 0                 |
|          | ORF8  | 65 | 0  | 27884 | 0     | 0                 |
|          | N     | 65 | 65 | 28256 | 28256 | 5(4,5,4,4)        |
|          | ORF10 | 65 | 0  | 29530 | 0     | 0                 |
|          | S     | 65 | 0  | 21552 | 0     | 0                 |
|          | ORF3a | 69 | 69 | 25385 | 25385 | 1(0,0,0,0)        |
| S2-Day11 | E     | 69 | 0  | 26237 | 0     | 0                 |
|          | M     | 65 | 65 | 26469 | 26469 | 2(2,2,2,2)        |
|          | ORF6  | 69 | 0  | 27041 | 0     | 0                 |

|          |       |    |    |       |       |            |
|----------|-------|----|----|-------|-------|------------|
| S2-Day11 | ORF7a | 69 | 0  | 27388 | 0     | 0          |
|          | ORF7b | 65 | 0  | 27644 | 0     | 0          |
|          | ORF8  | 65 | 0  | 27884 | 0     | 0          |
|          | N     | 65 | 0  | 28256 | 0     | 0          |
|          | ORF10 | 65 | 0  | 29530 | 0     | 0          |
|          | S     | 65 | 0  | 21552 | 0     | 0          |
|          | ORF3a | 69 | 0  | 25385 | 0     | 0          |
|          | E     | 69 | 0  | 26237 | 0     | 0          |
|          | M     | 65 | 0  | 26469 | 0     | 0          |
|          | ORF6  | 69 | 0  | 27041 | 0     | 0          |
| S3-Day12 | ORF7a | 69 | 0  | 27388 | 0     | 0          |
|          | ORF7b | 65 | 0  | 27644 | 0     | 0          |
|          | ORF8  | 65 | 0  | 27884 | 0     | 0          |
|          | N     | 65 | 65 | 28256 | 28256 | 1(0,1,0,0) |
|          | ORF10 | 65 | 0  | 29530 | 0     | 0          |
|          | S     | 65 | 0  | 21552 | 0     | 0          |
|          | ORF3a | 69 | 69 | 25385 | 25385 | 1(0,0,0,0) |
|          | E     | 69 | 0  | 26237 | 0     | 0          |
|          | M     | 65 | 0  | 26469 | 0     | 0          |
|          | ORF6  | 69 | 69 | 27041 | 27041 | 2(2,2,2,2) |
| S3-Day15 | ORF7a | 69 | 69 | 27388 | 27388 | 1(0,1,0,0) |
|          | ORF7b | 65 | 0  | 27644 | 0     | 0          |
|          | ORF8  | 65 | 0  | 27884 | 0     | 0          |
|          | N     | 65 | 65 | 28256 | 28256 | 2(2,2,2,0) |
|          | ORF10 | 65 | 0  | 29530 | 0     | 0          |

The numbers in the bracket are (reads with left primers, reads with right primers, reads with both primers, reads with no primers)  
Normalized count=(Read count/Total number of read mapped on reference genome)\*1000000.  
Total number of read mapped on reference genome is 40751196, 34608693, 32168622, 322809  
“ref\_leader\_end” and “peak\_leader\_end” point to the reference position of the end of leader ar

| peak_normal                                                  | cluster_count | cluster_normalized_count |
|--------------------------------------------------------------|---------------|--------------------------|
| 71.85(71.80,52948(2946,2272.34(72.29,54.23,54.18,59.34)      |               |                          |
| 14.18(14.06,0581(576,0,0,114.26(14.13,0.00,0.00,0.29)        |               |                          |
| 55.85(55.78,02276(2273,2,55.85(55.78,0.05,0.05,0.25)         |               |                          |
| 14.90(14.90,1618(618,565,15.17(15.17,13.86,13.86,14.48)      |               |                          |
| 0                                                            | 0             | 0                        |
| 0                                                            | 0             | 0                        |
| 0                                                            | 0             | 0                        |
| 0                                                            | 0             | 0                        |
| 92.56(92.51,94254(4250,41104.39(104.29,102.43,102.33,103.16) |               |                          |
| 0                                                            | 0             | 0                        |
| 159.76(159.55568(5562,45160.88(160.71,132.08,131.93,140.25)  |               |                          |
| 33.98(33.75,01180(1172,0,34.10(33.86,0.00,0.00,1.10)         |               |                          |
| 61.78(61.63,02138(2133,4,61.78(61.63,0.12,0.12,0.69)         |               |                          |
| 120.66(120.57998(7987,75231.10(230.78,219.42,219.28,226.13)  |               |                          |
| 65.50(65.45,02278(2276,2165.82(65.76,62.44,62.44,62.18)      |               |                          |
| 0.35(0.26,0.112(9,5,2,6)0.35(0.26,0.14,0.06,0.17)            |               |                          |
| 0                                                            | 0             | 0                        |
| 0                                                            | 0             | 0                        |
| 845.19(844.131113(31065898.99(897.61,884.63,883.25,887.18)   |               |                          |
| 0                                                            | 0             | 0                        |
| 37.02(36.96,21199(1197,9037.27(37.21,28.10,28.04,30.15)      |               |                          |
| 10.13(9.98,0.327(322,0,0,110.17(10.01,0.00,0.00,0.31)        |               |                          |
| 0                                                            | 0             | 0                        |
| 36.37(36.37,01180(1180,1036.68(36.68,34.04,34.04,36.00)      |               |                          |
| 20.11(20.11,1652(652,596,20.27(20.27,18.53,18.53,18.65)      |               |                          |
| 0.22(0.19,0.07(6,1,0,0)0.22(0.19,0.03,0.00,0.00)             |               |                          |
| 0                                                            | 0             | 0                        |
| 0.47(0.47,0.015(15,0,0,0)0.47(0.47,0.00,0.00,0.00)           |               |                          |
| 125.77(125.64226(4215,41131.37(131.03,129.82,129.51,129.38)  |               |                          |
| 0                                                            | 0             | 0                        |
| 91.63(91.42,72976(2969,2592.19(91.97,79.99,79.80,82.77)      |               |                          |
| 3.10(3.04,0.0100(98,0,0,2)3.10(3.04,0.00,0.00,0.06)          |               |                          |
| 0                                                            | 0             | 0                        |
| 156.84(156.75129(5127,49158.89(158.82,153.90,153.90,154.95)  |               |                          |
| 143.34(143.14655(4648,44144.20(143.99,137.85,137.64,139.65)  |               |                          |
| 0.28(0.25,0.09(8,1,0,0)0.28(0.25,0.03,0.00,0.00)             |               |                          |
| 0.03(0.03,0.01(1,0,0,0)0.03(0.03,0.00,0.00,0.00)             |               |                          |
| 0.25(0.25,0.08(8,0,0,0)0.25(0.25,0.00,0.00,0.00)             |               |                          |
| 956.26(955.031777(31713984.39(982.41,963.97,962.02,971.60)   |               |                          |
| 0                                                            | 0             | 0                        |
| 236.54(236.56806(6805,62238.01(237.98,217.66,217.62,213.53)  |               |                          |
| 0                                                            | 0             | 0                        |

|                             |                                          |   |
|-----------------------------|------------------------------------------|---|
| 0                           | 0                                        | 0 |
| 83.09(83.09,€ 2516(2515,24  | 87.99(87.95,85.71,85.68,84.91)           |   |
| 0                           | 0                                        | 0 |
| 0                           | 0                                        | 0 |
| 0.07(0.07,0.0 2(2,0,0,2)    | 0.07(0.07,0.00,0.00,0.07)                |   |
| 0                           | 0                                        | 0 |
| 1262.17(126( 45257(45180    | 1582.68(1579.99,1568.03,1565.37,1531.59) |   |
| 0                           | 0                                        | 0 |
| 79.85(79.82,€ 2419(2418,2(  | 80.48(80.45,68.84,68.80,70.07)           |   |
| 37.33(36.86,( 1123(1109,0,  | 37.36(36.90,0.00,0.00,0.60)              |   |
| 90.53(90.36,( 2721(2716,6,  | 90.53(90.36,0.20,0.20,0.47)              |   |
| 287.43(287.1 8851(8844,8€   | 294.48(294.25,287.96,287.79,292.18)      |   |
| 146.06(145.6 4411(4399,41   | 146.76(146.36,138.44,138.07,138.67)      |   |
| 0.96(0.57,0.4 29(17,12,0,14 | 0.96(0.57,0.40,0.00,0.47)                |   |
| 0                           | 0                                        | 0 |
| 0.96(0.96,0.0 29(29,0,0,0)  | 0.96(0.96,0.00,0.00,0.00)                |   |
| 201.22(200.3 7381(7353,72   | 245.57(244.64,240.41,239.52,180.46)      |   |
| 0                           | 0                                        | 0 |
| 0                           | 0                                        | 0 |
| 9.70(9.60,0.0 288(285,0,0,2 | 9.77(9.67,0.00,0.00,0.07)                |   |
| 0                           | 0                                        | 0 |
| 0                           | 0                                        | 0 |
| 0                           | 0                                        | 0 |
| 0.41(0.34,0.0 12(10,2,0,8)  | 0.41(0.34,0.07,0.00,0.27)                |   |
| 0                           | 0                                        | 0 |
| 0                           | 0                                        | 0 |
| 2.31(0.24,2.3 72(8,72,8,26) | 2.44(0.27,2.44,0.27,0.88)                |   |
| 0                           | 0                                        | 0 |
| 0                           | 0                                        | 0 |
| 0                           | 0                                        | 0 |
| 0                           | 0                                        | 0 |
| 4.99(4.94,4.8 109(108,107,  | 5.92(5.86,5.81,5.75,5.64)                |   |
| 0                           | 0                                        | 0 |
| 0                           | 0                                        | 0 |
| 0                           | 0                                        | 0 |
| 0                           | 0                                        | 0 |
| 0.27(0.22,0.2 5(4,5,4,4)    | 0.27(0.22,0.27,0.22,0.22)                |   |
| 0                           | 0                                        | 0 |
| 0                           | 0                                        | 0 |
| 0.06(0.00,0.0 1(0,0,0,0)    | 0.06(0.00,0.00,0.00,0.00)                |   |
| 0                           | 0                                        | 0 |
| 0.11(0.11,0.1 2(2,2,2,2)    | 0.11(0.11,0.11,0.11,0.11)                |   |
| 0                           | 0                                        | 0 |

|               |            |                           |
|---------------|------------|---------------------------|
| 0             | 0          | 0                         |
| 0             | 0          | 0                         |
| 0             | 0          | 0                         |
| 0             | 0          | 0                         |
| 0             | 0          | 0                         |
| 0             | 0          | 0                         |
| 0             | 0          | 0                         |
| 0             | 0          | 0                         |
| 0             | 0          | 0                         |
| 0             | 0          | 0                         |
| 0             | 0          | 0                         |
| 0             | 0          | 0                         |
| 0             | 0          | 0                         |
| 0.09(0.00,0.0 | 1(0,1,0,0) | 0.09(0.00,0.09,0.00,0.00) |
| 0             | 0          | 0                         |
| 0             | 0          | 0                         |
| 0.08(0.00,0.0 | 1(0,0,0,0) | 0.08(0.00,0.00,0.00,0.00) |
| 0             | 0          | 0                         |
| 0             | 0          | 0                         |
| 0.16(0.16,0.1 | 2(2,2,2,2) | 0.16(0.16,0.16,0.16,0.16) |
| 0.08(0.00,0.0 | 1(0,1,0,0) | 0.08(0.00,0.08,0.00,0.00) |
| 0             | 0          | 0                         |
| 0             | 0          | 0                         |
| 0.16(0.16,0.1 | 2(2,2,2,0) | 0.16(0.16,0.16,0.16,0.00) |
| 0             | 0          | 0                         |

th primers, same junction on paired reads with at least a primer).

32, 28595139, 30056513, 29481101, 18427015, 17677974, 11329365, 10742292 and 1278665  
 rd the position of the end of leader identified in the most common reads (peak count) on the i







5, excluding the mapped reads unpaired, not primary alignment and supplementary alignment.  
reference genome, and “ref\_TRS\_start” and “peak\_TRS\_start” refer to the reference position of





the start of TRS and the position of the start of TRS identified in the most common reads (peak c





ount) on the reference genome.

|         | subgenome | peak_leader_peak_TRS_st | ACGAAC    | ATG_postion |
|---------|-----------|-------------------------|-----------|-------------|
| S1-Day1 | M         | 65                      | 26469 yes | 26523       |
|         | ORF7a     | 69                      | 27388 yes | 27394       |
|         | N         | 65                      | 28256 yes | 28274       |
|         | ORF3a     | 69                      | 25385 yes | 25393       |
| S2-Day2 | M         | 64                      | 26468 yes | 26523       |
|         | ORF7a     | 69                      | 27388 yes | 27394       |
|         | ORF8      | 65                      | 27884 yes | 27894       |
|         | N         | 64                      | 28255 yes | 28274       |
|         | S         | 65                      | 21552 yes | 21563       |
|         | ORF3a     | 69                      | 25385 yes | 25393       |
|         | E         | 69                      | 26237 yes | 26245       |
| S3-Day3 | M         | 64                      | 26468 yes | 26523       |
|         | ORF6      | 69                      | 27041 yes | 27202       |
|         | ORF7a     | 69                      | 27388 yes | 27394       |
|         | ORF7b     | 65                      | 27644 no  | 27756       |
|         | ORF8      | 65                      | 27884 yes | 27894       |
|         | N         | 64                      | 28255 yes | 28274       |
|         | S         | 65                      | 21552 yes | 21563       |
|         | ORF3a     | 69                      | 25385 yes | 25393       |
|         | E         | 69                      | 26237 yes | 26245       |
|         | M         | 65                      | 26469 yes | 26523       |
| S1-Day4 | ORF6      | 69                      | 27041 yes | 27202       |
|         | ORF7a     | 69                      | 27388 yes | 27394       |
|         | ORF7b     | 65                      | 27644 no  | 27756       |
|         | ORF8      | 65                      | 27884 yes | 27894       |
|         | N         | 64                      | 28255 yes | 28274       |
|         | S         | 65                      | 21552 yes | 21563       |
|         | ORF3a     | 69                      | 25385 yes | 25393       |
| S2-Day5 | M         | 65                      | 26469 yes | 26523       |
|         | N         | 65                      | 28256 yes | 28274       |
|         | S         | 65                      | 21552 yes | 21563       |
|         | ORF3a     | 69                      | 25385 yes | 25393       |
|         | M         | 65                      | 26469 yes | 26523       |
|         | ORF6      | 69                      | 27041 yes | 27202       |
| S3-Day6 | ORF7a     | 69                      | 27388 yes | 27394       |
|         | ORF7b     | 65                      | 27644 no  | 27756       |
|         | ORF8      | 65                      | 27884 yes | 27894       |
|         | N         | 63                      | 28254 yes | 28274       |
|         | ORF7a     | 69                      | 27388 yes | 27394       |
| S2-Day8 | N         | 65                      | 28256 yes | 28274       |
|         | ORF6      | 69                      | 27041 yes | 27202       |
| S3-Day9 | N         | 65                      | 28256 yes | 28274       |



|          |       |    |           |       |
|----------|-------|----|-----------|-------|
|          | M     | 65 | 26469 yes | 26523 |
| S2-Day11 | ORF6  | 69 | 27041 yes | 27202 |
|          | ORF7b | 65 | 27644 no  | 27756 |
|          | N     | 64 | 28255 yes | 28274 |
| S3-Day12 | M     | 65 | 26469 yes | 26523 |
|          | N     | 65 | 28256 yes | 28274 |
| S3-Day19 | ORF3a | 69 | 25385 yes | 25393 |

“peak\_leader” and “peak\_TRS\_start” point to the leader-TRS junctions in sheet "known", “ACGAA



ATCTCTTAGATCTGTTCT  
CTTAGATCTGTTCTCTAA  
ATCTCTTAGATCTGTTCT  
GATCTCTTAGATCTGTTCT  
ATCTCTTAGATCTGTTCT  
ATCTCTTAGATCTGTTCT  
CTTAGATCTGTTCTCTAA

CTAACGAAK MADSNGTITVEELKKLLEQWNLVIGFLFTW  
ACGAACGCTI MFHLVDFQVTIAEILLIIMRTFKVSIWNLDYIII  
CTAAACTGTT MIELSLIDFYLCFLAFLFLVLIIMLIIFWFSLELQ  
TCTAACGAAK MSDNGPQNQRNAPRITFGGPSDSTGSNQN  
CTAACGAAK MADSNGTITVEELKKLLEQWNLVIGFLFTW  
CTAACGAAK MSDNGPQNQRNAPRITFGGPSDSTGSNQN  
ACGAACTT MDLFMRIFTIGTVTLKQGEIKDATPSDFVRAI

"C" indicates if there is a ACGAAC sequence in the "TRS\_seq" (TRS sequences), "20\_leader\_seq"

'ICLLQFAYANRNRFLYIIKLIFLWLLWPVTLACFVLAAYRINWITGGIAIAMAACLVGLMWLSYFIASFRLFARTF  
PSSGTYEGNSPFHPLADNKFALTCFSTQFAFACPDGVKHVYQLRARSVSPKLFIRQEEVQELYSPIFLIVAAIVFI  
IGERSGARSKQRRPQGLPNNTASWFTALTQHKGEDLKFRGQGVPIINTNSSPDDQIGYYRRATRRIRGGDGK  
TATIPIQASLPFGWLIVGVALLAVFQSASKIITLKKRWQLALSCKGVHFVCNLLLLFVTVYSHLLLVAAGLEAPFLYL  
'ICLLQFAYANRNRFLYIIKLIFLWLLWPVTLACFVLAAYRINWITGGIAIAMAACLVGLMWLSYFIASFRLFARTF  
PSSGTYEGNSPFHPLADNKFALTCFSTQFAFACPDGVKHVYQLRARSVSPKLFIRQEEVQELYSPIFLIVAAIVFI  
VDDPCPIHFYSKWYIRVGARKSAPLIELCVDEAGSKSPIQYIDIGNYTVSCLPFTINCQEPKLGSLVVRCSFYEDF  
IGERSGARSKQRRPQGLPNNTASWFTALTQHKGEDLKFRGQGVPIINTNSSPDDQIGYYRRATRRIRGGDGK  
TRGVYYPDKVFRSSVLHSTQDLFLPFFSNVTWFHAIHVSGTNGTKRFDNPVLPFNDGVYFASTEKSNIIRGWII  
TATIPIQASLPFGWLIVGVALLAVFQSASKIITLKKRWQLALSCKGVHFVCNLLLLFVTVYSHLLLVAAGLEAPFLYL  
TALRLCAYCCNIVNVSLVKPSFYVYSRVKNLNSSRVPDLLV\*  
'ICLLQFAYANRNRFLYIIKLIFLWLLWPVTLACFVLAAYRINWITGGIAIAMAACLVGLMWLSYFIASFRLFARTF  
NLIKNLSKSLTENKYSQLDEEQPMEID\*  
PSSGTYEGNSPFHPLADNKFALTCFSTQFAFACPDGVKHVYQLRARSVSPKLFIRQEEVQELYSPIFLIVAAIVFI  
DHNETCHA\*  
VDDPCPIHFYSKWYIRVGARKSAPLIELCVDEAGSKSPIQYIDIGNYTVSCLPFTINCQEPKLGSLVVRCSFYEDF  
IGERSGARSKQRRPQGLPNNTASWFTALTQHKGEDLKFRGQGVPIINTNSSPDDQIGYYRRATRRIRGGDGK  
TRGVYYPDKVFRSSVLHSTQDLFLPFFSNVTWFHAIHVSGTNGTKRFDNPVLPFNDGVYFASTEKSNIIRGWII  
TATIPIQASLPFGWLIVGVALLAVFQSASKIITLKKRWQLALSCKGVHFVCNLLLLFVTVYSHLLLVAAGLEAPFLYL  
TALRLCAYCCNIVNVSLVKPSFYVYSRVKNLNSSRVPDLLV\*  
'ICLLQFAYANRNRFLYIIKLIFLWLLWPVTLACFVLAAYRINWITGGIAIAMAACLVGLMWLSYFIASFRLFARTF  
NLIKNLSKSLTENKYSQLDEEQPMEID\*  
PSSGTYEGNSPFHPLADNKFALTCFSTQFAFACPDGVKHVYQLRARSVSPKLFIRQEEVQELYSPIFLIVAAIVFI  
DHNETCHA\*  
VDDPCPIHFYSKWYIRVGARKSAPLIELCVDEAGSKSPIQYIDIGNYTVSCLPFTINCQEPKLGSLVVRCSFYEDF  
IGERSGARSKQRRPQGLPNNTASWFTALTQHKGEDLKFRGQGVPIINTNSSPDDQIGYYRRATRRIRGGDGK  
TRGVYYPDKVFRSSVLHSTQDLFLPFFSNVTWFHAIHVSGTNGTKRFDNPVLPFNDGVYFASTEKSNIIRGWII  
TATIPIQASLPFGWLIVGVALLAVFQSASKIITLKKRWQLALSCKGVHFVCNLLLLFVTVYSHLLLVAAGLEAPFLYL  
'ICLLQFAYANRNRFLYIIKLIFLWLLWPVTLACFVLAAYRINWITGGIAIAMAACLVGLMWLSYFIASFRLFARTF  
IGERSGARSKQRRPQGLPNNTASWFTALTQHKGEDLKFRGQGVPIINTNSSPDDQIGYYRRATRRIRGGDGK  
TRGVYYPDKVFRSSVLHSTQDLFLPFFSNVTWFHAIHVSGTNGTKRFDNPVLPFNDGVYFASTEKSNIIRGWII  
TATIPIQASLPFGWLIVGVALLAVFQSASKIITLKKRWQLALSCKGVHFVCNLLLLFVTVYSHLLLVAAGLEAPFLYL  
'ICLLQFAYANRNRFLYIIKLIFLWLLWPVTLACFVLAAYRINWITGGIAIAMAACLVGLMWLSYFIASFRLFARTF  
NLIKNLSKSLTENKYSQLDEEQPMEID\*  
PSSGTYEGNSPFHPLADNKFALTCFSTQFAFACPDGVKHVYQLRARSVSPKLFIRQEEVQELYSPIFLIVAAIVFI  
DHNETCHA\*  
VDDPCPIHFYSKWYIRVGARKSAPLIELCVDEAGSKSPIQYIDIGNYTVSCLPFTINCQEPKLGSLVVRCSFYEDF  
IGERSGARSKQRRPQGLPNNTASWFTALTQHKGEDLKFRGQGVPIINTNSSPDDQIGYYRRATRRIRGGDGK  
PSSGTYEGNSPFHPLADNKFALTCFSTQFAFACPDGVKHVYQLRARSVSPKLFIRQEEVQELYSPIFLIVAAIVFI  
IGERSGARSKQRRPQGLPNNTASWFTALTQHKGEDLKFRGQGVPIINTNSSPDDQIGYYRRATRRIRGGDGK  
NLIKNLSKSLTENKYSQLDEEQPMEID\*  
IGERSGARSKQRRPQGLPNNTASWFTALTQHKGEDLKFRGQGVPIINTNSSPDDQIGYYRRATRRIRGGDGK

'ICLLQFAYANRNRFLYIIKLIFLWLLWPVTLACFVLAAYRINWITGGIAIAMAACLVGLMWLSYFIASFRLFARTF  
NLIKNLSKSLTENKYSQLDEEQPMEID\*

!DHNETCHA\*

IGERSGARSKQRRPQGLPNNTASWFTALTQHGKEDLKFPRGQGVPIINTNSSPDDQIGYYRRATRRIRGGDGK

'ICLLQFAYANRNRFLYIIKLIFLWLLWPVTLACFVLAAYRINWITGGIAIAMAACLVGLMWLSYFIASFRLFARTF

IGERSGARSKQRRPQGLPNNTASWFTALTQHGKEDLKFPRGQGVPIINTNSSPDDQIGYYRRATRRIRGGDGK

TATIPIQASLPFGWLIVGVALLAVFQSASKIITLKKRWQLALSKGVHFVCNLLLLFVTVYSHLLLVAAGLEAPFLYL

” refers to the 20 nucleotides before the end of leader, and “AUG\_postion” and “first\_orf\_aa” |

SMWSFNPETNILLNVPLHGTILTRP LLESELVIGAVILRGHLRIAGHHLGRCDIKDLPKEITVATSRTLSYYKLGAS!  
ITLCFTLKRKTE\*

.MKDLSPRWYFYLLGTGPEAGLPYGANKDGIWVATEGALNTPKDHIGTRNPANNAIIVLQLPQGTTLPKGF)  
.YALVYFLQSINFVRIIMRLWLCWKCRSKNPLLYDANYFLCWHTNCYDYCIPYNSVTSSIVITSGDGTTSPISEHD

SMWSFNPETNILLNVPLHGTILTRP LLESELVIGAVILRGHLRIAGHHLGRCDIKDLPKEITVATSRTLSYYKLGAS!  
ITLCFTLKRKTE\*

LEYHDVRRVLDIFI\*

.MKDLSPRWYFYLLGTGPEAGLPYGANKDGIWVATEGALNTPKDHIGTRNPANNAIIVLQLPQGTTLPKGF)  
FGTTLDSKTQSLIVNNATNVVIVKVEFCNDPFLGVVYHKNKSWMESEFRVYSSANNCTFEYVSQPFLMI  
.YALVYFLQSINFVRIIMRLWLCWKCRSKNPLLYDANYFLCWHTNCYDYCIPYNSVTSSIVITSGDGTTSPISEHD

SMWSFNPETNILLNVPLHGTILTRP LLESELVIGAVILRGHLRIAGHHLGRCDIKDLPKEITVATSRTLSYYKLGAS!  
ITLCFTLKRKTE\*

LEYHDVRRVLDIFI\*

.MKDLSPRWYFYLLGTGPEAGLPYGANKDGIWVATEGALNTPKDHIGTRNPANNAIIVLQLPQGTTLPKGF)  
FGTTLDSKTQSLIVNNATNVVIVKVEFCNDPFLGVVYHKNKSWMESEFRVYSSANNCTFEYVSQPFLMI  
.YALVYFLQSINFVRIIMRLWLCWKCRSKNPLLYDANYFLCWHTNCYDYCIPYNSVTSSIVITSGDGTTSPISEHD

SMWSFNPETNILLNVPLHGTILTRP LLESELVIGAVILRGHLRIAGHHLGRCDIKDLPKEITVATSRTLSYYKLGAS!  
ITLCFTLKRKTE\*

LEYHDVRRVLDIFI\*

.MKDLSPRWYFYLLGTGPEAGLPYGANKDGIWVATEGALNTPKDHIGTRNPANNAIIVLQLPQGTTLPKGF)  
FGTTLDSKTQSLIVNNATNVVIVKVEFCNDPFLGVVYHKNKSWMESEFRVYSSANNCTFEYVSQPFLMI  
.YALVYFLQSINFVRIIMRLWLCWKCRSKNPLLYDANYFLCWHTNCYDYCIPYNSVTSSIVITSGDGTTSPISEHD

SMWSFNPETNILLNVPLHGTILTRP LLESELVIGAVILRGHLRIAGHHLGRCDIKDLPKEITVATSRTLSYYKLGAS!  
.MKDLSPRWYFYLLGTGPEAGLPYGANKDGIWVATEGALNTPKDHIGTRNPANNAIIVLQLPQGTTLPKGF)

FGTTLDSKTQSLIVNNATNVVIVKVEFCNDPFLGVVYHKNKSWMESEFRVYSSANNCTFEYVSQPFLMI  
.YALVYFLQSINFVRIIMRLWLCWKCRSKNPLLYDANYFLCWHTNCYDYCIPYNSVTSSIVITSGDGTTSPISEHD  
SMWSFNPETNILLNVPLHGTILTRP LLESELVIGAVILRGHLRIAGHHLGRCDIKDLPKEITVATSRTLSYYKLGAS!

ITLCFTLKRKTE\*

LEYHDVRRVLDIFI\*

.MKDLSPRWYFYLLGTGPEAGLPYGANKDGIWVATEGALNTPKDHIGTRNPANNAIIVLQLPQGTTLPKGF)  
ITLCFTLKRKTE\*

.MKDLSPRWYFYLLGTGPEAGLPYGANKDGIWVATEGALNTPKDHIGTRNPANNAIIVLQLPQGTTLPKGF)

.MKDLSPRWYFYLLGTGPEAGLPYGANKDGIWVATEGALNTPKDHIGTRNPANNAIIVLQLPQGTTLPKGF)

SMWSFNPETNILLNVPLHGTILTRP LLESELVIGAVILRGHLRIAGHHLGRCDIKDLPKEITVATSRTLSYYKLGA

MKDLSPRWYFYLLGTGPEAGLPYGANKDGIWVATEGALNTPKDHIGTRNPANNAIVLQLPQGTTLPKGF

SMWSFNPETNILLNVPLHGTILTRP LLESELVIGAVILRGHLRIAGHHLGRCDIKDLPKEITVATSRTLSYYKLGA

MKDLSPRWYFYLLGTGPEAGLPYGANKDGIWVATEGALNTPKDHIGTRNPANNAIVLQLPQGTTLPKGF

YALVYFLQSINFVRIIMRLWLCWKCRSKNPLLYDANYFLCWHTNCYDYCIPYNSVTSSIVITSGDGTTSPISEHD

refer to the first AUG position and translated orf of the sgmRNA.

SQRVAGDSGFAAYSRYRIGNYKLNTDHSSSSDNIALLVQ\*

YAEGRGGSQASSRSSSRNRNSTRNTPGSSRGTSPARMAGNGGDAALALLLDRLNQLESKMSGKGQQQQ  
YQIGGYTEKWESGVKDCVVLHSYFTSDYYQLYSTQLSTDTGVEHVTFIYNKIVDEPEEHVQIHTIDGSSGVVN  
SQRVAGDSGFAAYSRYRIGNYKLNTDHSSSSDNIALLVQ\*

YAEGRGGSQASSRSSSRNRNSTRNTPGSSRGTSPARMAGNGGDAALALLLDRLNQLESKMSGKGQQQQ  
DLEGKQGNFKNLREFVFNIDGYFKIYSKHTPINLVRDLPQGFSALEPLVDLPIGINITRFQTLALHRSYLTPGDS  
YQIGGYTEKWESGVKDCVVLHSYFTSDYYQLYSTQLSTDTGVEHVTFIYNKIVDEPEEHVQIHTIDGSSGVVN

SQRVAGDSGFAAYSRYRIGNYKLNTDHSSSSDNIALLVQ\*

YAEGRGGSQASSRSSSRNRNSTRNTPGSSRGTSPARMAGNGGDAALALLLDRLNQLESKMSGKGQQQQ  
DLEGKQGNFKNLREFVFNIDGYFKIYSKHTPINLVRDLPQGFSALEPLVDLPIGINITRFQTLALHRSYLTPGDS  
YQIGGYTEKWESGVKDCVVLHSYFTSDYYQLYSTQLSTDTGVEHVTFIYNKIVDEPEEHVQIHTIDGSSGVVN

SQRVAGDSGFAAYSRYRIGNYKLNTDHSSSSDNIALLVQ\*

YAEGRGGSQASSRSSSRNRNSTRNTPGSSRGTSPARMAGNGGDAALALLLDRLNQLESKMSGKGQQQQ  
DLEGKQGNFKNLREFVFNIDGYFKIYSKHTPINLVRDLPQGFSALEPLVDLPIGINITRFQTLALHRSYLTPGDS  
YQIGGYTEKWESGVKDCVVLHSYFTSDYYQLYSTQLSTDTGVEHVTFIYNKIVDEPEEHVQIHTIDGSSGVVN  
SQRVAGDSGFAAYSRYRIGNYKLNTDHSSSSDNIALLVQ\*

YAEGRGGSQASSRSSSRNRNSTRNTPGSSRGTSPARMAGNGGDAALALLLDRLNQLESKMSGKGQQQQ  
DLEGKQGNFKNLREFVFNIDGYFKIYSKHTPINLVRDLPQGFSALEPLVDLPIGINITRFQTLALHRSYLTPGDS  
YQIGGYTEKWESGVKDCVVLHSYFTSDYYQLYSTQLSTDTGVEHVTFIYNKIVDEPEEHVQIHTIDGSSGVVN  
SQRVAGDSGFAAYSRYRIGNYKLNTDHSSSSDNIALLVQ\*

YAEGRGGSQASSRSSSRNRNSTRNTPGSSRGTSPARMAGNGGDAALALLLDRLNQLESKMSGKGQQQQ

YAEGRGGSQASSRSSSRNRNSTRNTPGSSRGTSPARMAGNGGDAALALLLDRLNQLESKMSGKGQQQQ

YAEGRGGSQASSRSSSRNRNSTRNTPGSSRGTSPARMAGNGGDAALALLLDRLNQLESKMSGKGQQQQ



SQRVAGDSGFAAYSRYRIGNYKLNTDHSSSDNIALLVQ\*

YAEGRGGSQASSRSSSRNSSRNSTPGSSRGTSPARMAGNGGDAALALLLDRLNQLESKMSGKGQQQQ

SQRVAGDSGFAAYSRYRIGNYKLNTDHSSSDNIALLVQ\*

YAEGRGGSQASSRSSSRNSSRNSTPGSSRGTSPARMAGNGGDAALALLLDRLNQLESKMSGKGQQQQ

YQIGGYTEKWESGVKDCVVLHSYFTSDYYQLYSTQLSTDTGVEHVTFIYNKIVDEPEEHVQIHTIDGSSGVVN

.GQTVTKKSAAEASKKPRQKRTATKAYNVTQAFGRRGPEQTQGNFGDQELIRQGTDYKHWPQIAQFAPSAS/  
PVMEPIYDEPTTTTTSVPL\*

.GQTVTKKSAAEASKKPRQKRTATKAYNVTQAFGRRGPEQTQGNFGDQELIRQGTDYKHWPQIAQFAPSAS/  
;SSGWTAGAAAYVGYLQPRTFLLKYNENGTITDAVDCALDPLSETKCTLSFTVEKGIYQTSNFRVQPTESIVR  
PVMEPIYDEPTTTTTSVPL\*

.GQTVTKKSAAEASKKPRQKRTATKAYNVTQAFGRRGPEQTQGNFGDQELIRQGTDYKHWPQIAQFAPSAS/  
;SSGWTAGAAAYVGYLQPRTFLLKYNENGTITDAVDCALDPLSETKCTLSFTVEKGIYQTSNFRVQPTESIVR  
PVMEPIYDEPTTTTTSVPL\*

.GQTVTKKSAAEASKKPRQKRTATKAYNVTQAFGRRGPEQTQGNFGDQELIRQGTDYKHWPQIAQFAPSAS/  
;SSGWTAGAAAYVGYLQPRTFLLKYNENGTITDAVDCALDPLSETKCTLSFTVEKGIYQTSNFRVQPTESIVR  
PVMEPIYDEPTTTTTSVPL\*

.GQTVTKKSAAEASKKPRQKRTATKAYNVTQAFGRRGPEQTQGNFGDQELIRQGTDYKHWPQIAQFAPSAS/  
;SSGWTAGAAAYVGYLQPRTFLLKYNENGTITDAVDCALDPLSETKCTLSFTVEKGIYQTSNFRVQPTESIVR  
PVMEPIYDEPTTTTTSVPL\*

.GQTVTKKSAAEASKKPRQKRTATKAYNVTQAFGRRGPEQTQGNFGDQELIRQGTDYKHWPQIAQFAPSAS/

.GQTVTKKSAAEASKKPRQKRTATKAYNVTQAFGRRGPEQTQGNFGDQELIRQGTDYKHWPQIAQFAPSAS/

.GQTVTKKSAAEASKKPRQKRTATKAYNVTQAFGRRGPEQTQGNFGDQELIRQGTDYKHWPQIAQFAPSAS/

.GQTVTKKSAAEASKKPRQKRTATKAYNVTQAFGRRGPEQTQGNFGDQELIRQGTDYKHWPQIAQFAPSAS/

.GQTVTKKSAAEASKKPRQKRTATKAYNVTQAFGRRGPEQTQGNFGDQELIRQGTDYKHWPQIAQFAPSAS/  
PVMEPIYDEPTTTTSVPL\*

AFFGMSRIGMEVTPSGTWLTYTGAIKLDDKDPNFKDQVILLNKHIDAYKTFPPTTEPKDKKKKKADETQALPQR

AFFGMSRIGMEVTPSGTWLTYTGAIKLDDKDPNFKDQVILLNKHIDAYKTFPPTTEPKDKKKKKADETQALPQR  
FPNITNLCPFGEVFNATRFASVYAWNRKRISNCVADYSVLYNSASFSTFKCYGVSPKLNLDLFTNVYADSFVII

AFFGMSRIGMEVTPSGTWLTYTGAIKLDDKDPNFKDQVILLNKHIDAYKTFPPTTEPKDKKKKKADETQALPQR  
FPNITNLCPFGEVFNATRFASVYAWNRKRISNCVADYSVLYNSASFSTFKCYGVSPKLNLDLFTNVYADSFVII

AFFGMSRIGMEVTPSGTWLTYTGAIKLDDKDPNFKDQVILLNKHIDAYKTFPPTTEPKDKKKKKADETQALPQR  
FPNITNLCPFGEVFNATRFASVYAWNRKRISNCVADYSVLYNSASFSTFKCYGVSPKLNLDLFTNVYADSFVII

AFFGMSRIGMEVTPSGTWLTYTGAIKLDDKDPNFKDQVILLNKHIDAYKTFPPTTEPKDKKKKKADETQALPQR  
FPNITNLCPFGEVFNATRFASVYAWNRKRISNCVADYSVLYNSASFSTFKCYGVSPKLNLDLFTNVYADSFVII

AFFGMSRIGMEVTPSGTWLTYTGAIKLDDKDPNFKDQVILLNKHIDAYKTFPPTTEPKDKKKKKADETQALPQR

AFFGMSRIGMEVTPSGTWLTYTGAIKLDDKDPNFKDQVILLNKHIDAYKTFPPTTEPKDKKKKKADETQALPQR

AFFGMSRIGMEVTPSGTWLTYTGAIKLDDKDPNFKDQVILLNKHIDAYKTFPPTTEPKDKKKKKADETQALPQR

AFFGMSRIGMEVTPSGTWLTYTGAIKLDDKDPNFKDQVILLNKHIDAYKTFPPTPEPKDKKKKKADETQALPQR

AFFGMSRIGMEVTPSGTWLTYTGAIKLDDKDPNFKDQVILLNKHIDAYKTFPPTPEPKDKKKKKADETQALPQR

QKKQQTVTLLPAADLDDFSKQLQQSMSSADSTQA\*

QKKQQTVTLLPAADLDDFSKQLQQSMSSADSTQA\*

RGDEVRQIAPGQTGKIADYNYKLPDDFTGCVIAWNSNNLDSKVGGNYNLYRLFRKSNLKPFERDISTEIQAC

QKKQQTVTLLPAADLDDFSKQLQQSMSSADSTQA\*

RGDEVRQIAPGQTGKIADYNYKLPDDFTGCVIAWNSNNLDSKVGGNYNLYRLFRKSNLKPFERDISTEIQAC

QKKQQTVTLLPAADLDDFSKQLQQSMSSADSTQA\*

RGDEVRQIAPGQTGKIADYNYKLPDDFTGCVIAWNSNNLDSKVGGNYNLYRLFRKSNLKPFERDISTEIQAC

QKKQQTVTLLPAADLDDFSKQLQQSMSSADSTQA\*

RGDEVRQIAPGQTGKIADYNYKLPDDFTGCVIAWNSNNLDSKVGGNYNLYRLFRKSNLKPFERDISTEIQAC

QKKQQTVTLLPAADLDDFSKQLQQSMSSADSTQA\*

QKKQQTVTLLPAADLDDFSKQLQQSMSSADSTQA\*

QKKQQTVTLLPAADLDDFSKQLQQSMSSADSTQA\*

QKKQQTVLLPAADLDDFSKQLQQSMSSADSTQA\*

QKKQQTVLLPAADLDDFSKQLQQSMSSADSTQA\*

3STPCNGVEGFNCYFPLQSYGFQPTNGVGYQPYRVVVLSFELLHAPATVCGPKKSTNLVKNKCVNFNFNGLT(

3STPCNGVEGFNCYFPLQSYGFQPTNGVGYQPYRVVVLSFELLHAPATVCGPKKSTNLVKNKCVNFNFNGLT(

3STPCNGVEGFNCYFPLQSYGFQPTNGVGYQPYRVVVLSFELLHAPATVCGPKKSTNLVKNKCVNFNFNGLT(

3STPCNGVEGFNCYFPLQSYGFQPTNGVGYQPYRVVVLSFELLHAPATVCGPKKSTNLVKNKCVNFNFNGLT(





GTGVLTESNKKFLPFQQFGRDIADTTDAVRDPQTLEILDITPCSFGGVSVITPGTNTSNQVAVLYQDVNCTEVP

GTGVLTESNKKFLPFQQFGRDIADTTDAVRDPQTLEILDITPCSFGGVSVITPGTNTSNQVAVLYQDVNCTEVP

GTGVLTESNKKFLPFQQFGRDIADTTDAVRDPQTLEILDITPCSFGGVSVITPGTNTSNQVAVLYQDVNCTEVP

GTGVLTESNKKFLPFQQFGRDIADTTDAVRDPQTLEILDITPCSFGGVSVITPGTNTSNQVAVLYQDVNCTEVP



'VAIHADQLTPTWRVYSTGSNVFQTRAGCLIGAEHVNNSYECDIPIGAGICASYQTQTNSPRRARSVASQSIIA\

'VAIHADQLTPTWRVYSTGSNVFQTRAGCLIGAEHVNNSYECDIPIGAGICASYQTQTNSPRRARSVASQSIIA\

'VAIHADQLTPTWRVYSTGSNVFQTRAGCLIGAEHVNNSYECDIPIGAGICASYQTQTNSPRRARSVASQSIIA\

'VAIHADQLTPTWRVYSTGSNVFQTRAGCLIGAEHVNNSYECDIPIGAGICASYQTQTNSPRRARSVASQSIIA\



Y T M S L G A E N S V A Y S N N S I A I P T N F T I S V T T E I L P V S M T K T S V D C T M Y I C G D S T E C S N L L L Q Y G S F C T Q L N R A L T G I

Y T M S L G A E N S V A Y S N N S I A I P T N F T I S V T T E I L P V S M T K T S V D C T M Y I C G D S T E C S N L L L Q Y G S F C T Q L N R A L T G I

Y T M S L G A E N S V A Y S N N S I A I P T N F T I S V T T E I L P V S M T K T S V D C T M Y I C G D S T E C S N L L L Q Y G S F C T Q L N R A L T G I

Y T M S L G A E N S V A Y S N N S I A I P T N F T I S V T T E I L P V S M T K T S V D C T M Y I C G D S T E C S N L L L Q Y G S F C T Q L N R A L T G I



IAVEQDKNTQEVFAQVKQIYKTPPIKDFGGFNFSQILPDPSKPSKRSFIEDLLFNKVTLADAGFIKQYGDCLGDI/

IAVEQDKNTQEVFAQVKQIYKTPPIKDFGGFNFSQILPDPSKPSKRSFIEDLLFNKVTLADAGFIKQYGDCLGDI/

IAVEQDKNTQEVFAQVKQIYKTPPIKDFGGFNFSQILPDPSKPSKRSFIEDLLFNKVTLADAGFIKQYGDCLGDI/

IAVEQDKNTQEVFAQVKQIYKTPPIKDFGGFNFSQILPDPSKPSKRSFIEDLLFNKVTLADAGFIKQYGDCLGDI/





\ARDLICAQKFNGLTVLPPLTDEMIAQYTSALLAGTITSGWTFGAGAALQIPFAMQMAYRFNGIGVTQNVLY

\ARDLICAQKFNGLTVLPPLTDEMIAQYTSALLAGTITSGWTFGAGAALQIPFAMQMAYRFNGIGVTQNVLY

\ARDLICAQKFNGLTVLPPLTDEMIAQYTSALLAGTITSGWTFGAGAALQIPFAMQMAYRFNGIGVTQNVLY

\ARDLICAQKFNGLTVLPPLTDEMIAQYTSALLAGTITSGWTFGAGAALQIPFAMQMAYRFNGIGVTQNVLY



YENQKLIANQFNSAIGKIQDLSSTASALGKLQDVVNQNAQALNTLVKQLSSNFGAISSVLNDILSRDKVEAEV

YENQKLIANQFNSAIGKIQDLSSTASALGKLQDVVNQNAQALNTLVKQLSSNFGAISSVLNDILSRDKVEAEV

YENQKLIANQFNSAIGKIQDLSSTASALGKLQDVVNQNAQALNTLVKQLSSNFGAISSVLNDILSRDKVEAEV

YENQKLIANQFNSAIGKIQDLSSTASALGKLQDVVNQNAQALNTLVKQLSSNFGAISSVLNDILSRDKVEAEV



/QIDRLITGRLQSLQTYVTQQLIRAAEIRASANL

/QIDRLITGRLQSLQTYVTQQLIRAAEIRASANL

/QIDRLITGRLQSLQTYVTQQLIRAAEIRASANL

/QIDRLITGRLQSLQTYVTQQLIRAAEIRASANL

|         | subgenome | peak_leader_peak_TRS_start | ACGAAC | ATG_position | 20_leader_sequence |            |
|---------|-----------|----------------------------|--------|--------------|--------------------|------------|
| S1-Day1 | S         | 65                         | 21552  | yes          | 21563              | ATCTCTTGTA |
|         | ORF3a     | 69                         | 25385  | yes          | 25393              | CTTGTAGATC |
|         | E         | 69                         | 26237  | yes          | 26245              | CTTGTAGATC |
|         | M         | 65                         | 26469  | yes          | 26523              | ATCTCTTGTA |
|         | N         | 64                         | 28255  | yes          | 28274              | GATCTCTTGT |
| S2-Day2 | S         | 65                         | 21552  | yes          | 21563              | ATCTCTTGTA |
|         | ORF3a     | 69                         | 25385  | yes          | 25393              | CTTGTAGATC |
|         | E         | 69                         | 26237  | yes          | 26245              | CTTGTAGATC |
|         | M         | 64                         | 26468  | yes          | 26523              | GATCTCTTGT |
|         | ORF6      | 69                         | 27041  | yes          | 27202              | CTTGTAGATC |
| S3-Day3 | ORF7a     | 69                         | 27388  | yes          | 27394              | CTTGTAGATC |
|         | N         | 64                         | 28255  | yes          | 28274              | GATCTCTTGT |
|         | S         | 65                         | 21552  | yes          | 21563              | ATCTCTTGTA |
|         | ORF3a     | 69                         | 25385  | yes          | 25393              | CTTGTAGATC |
|         | M         | 65                         | 26469  | yes          | 26523              | ATCTCTTGTA |
| S1-Day4 | ORF6      | 69                         | 27041  | yes          | 27202              | CTTGTAGATC |
|         | ORF7a     | 69                         | 27388  | yes          | 27394              | CTTGTAGATC |
|         | ORF7b     | 65                         | 27644  | no           | 27756              | ATCTCTTGTA |
|         | ORF8      | 65                         | 27884  | yes          | 27894              | ATCTCTTGTA |
|         | N         | 64                         | 28255  | yes          | 28274              | GATCTCTTGT |
| S2-Day5 | S         | 65                         | 21552  | yes          | 21563              | ATCTCTTGTA |
|         | M         | 65                         | 26469  | yes          | 26523              | ATCTCTTGTA |
|         | ORF7b     | 65                         | 27644  | no           | 27756              | ATCTCTTGTA |
| S3-Day6 | N         | 68                         | 28263  | no           | 28274              | TCTTGAGAT  |
|         | S         | 65                         | 21552  | yes          | 21563              | ATCTCTTGTA |
|         | ORF3a     | 69                         | 25385  | yes          | 25393              | CTTGTAGATC |
|         | E         | 69                         | 26237  | yes          | 26245              | CTTGTAGATC |
|         | M         | 64                         | 26468  | yes          | 26523              | GATCTCTTGT |
| S2-Day8 | ORF6      | 69                         | 27041  | yes          | 27202              | CTTGTAGATC |
|         | ORF7a     | 69                         | 27388  | yes          | 27394              | CTTGTAGATC |
|         | ORF8      | 65                         | 27884  | yes          | 27894              | ATCTCTTGTA |
|         | N         | 65                         | 28256  | yes          | 28274              | ATCTCTTGTA |
|         | ORF3a     | 69                         | 25385  | yes          | 25393              | CTTGTAGATC |
| S2-Day8 | ORF7a     | 69                         | 27388  | yes          | 27394              | CTTGTAGATC |
|         | N         | 65                         | 28256  | yes          | 28274              | ATCTCTTGTA |

|          |       |    |       |     |       |            |
|----------|-------|----|-------|-----|-------|------------|
| S3-Day9  | M     | 65 | 26469 | yes | 26523 | ATCTCTTGTA |
|          | N     | 65 | 28256 | yes | 28274 | ATCTCTTGTA |
| S2-Day11 | ORF3a | 69 | 25385 | yes | 25393 | CTTGTAGATC |
|          | M     | 65 | 26469 | yes | 26523 | ATCTCTTGTA |
| S3-Day12 | N     | 65 | 28256 | yes | 28274 | ATCTCTTGTA |
|          | ORF3a | 69 | 25385 | yes | 25393 | CTTGTAGATC |
| S3-Day15 | ORF6  | 69 | 27041 | yes | 27202 | CTTGTAGATC |
|          | ORF7a | 69 | 27388 | yes | 27394 | CTTGTAGATC |
|          | N     | 65 | 28256 | yes | 28274 | ATCTCTTGTA |

“peak\_leader” and “peak\_TRS\_start” point to the leader-TRS junctions in sheet "known", “ACG,



TRS\_seq first\_orf\_aa

CTAAACGAAC MFVFLVLLPLVSSQCVNLTRTQLPPAYTNSFTRGVYYPDKVFRSSVLHSTQDLFLPFFSNVTV  
ACGAACTT MDLFMRIFTIGTVTLKQGEIKDATPSDFVRATATIPIQASLPFGWLIVGVALLAVFQSASKIITLI  
ACGAACTT MYSFVSEETGLIVNSVLLFLAFVVFLVTLAILTALRLCAYCCNIVNVSLVKPSFYVYSRVKLN  
CTAAACGAAC MADSNGTITVEELKKLLEQWNLVIGFLFTWICLLQFAYANRNRFLYIIKLIFLWLLWPVTLACI  
TCTAAACGAAC MSDNGPQNQRNAPRITFGGSPDSTGSNQNNGERSGARSKQRRPQGLPNNNTASWFTALTQF  
CTAAACGAAC MFVFLVLLPLVSSQCVNLTRTQLPPAYTNSFTRGVYYPDKVFRSSVLHSTQDLFLPFFSNVTV  
ACGAACTT MDLFMRIFTIGTVTLKQGEIKDATPSDFVRATATIPIQASLPFGWLIVGVALLAVFQSASKIITLI  
ACGAACTT MYSFVSEETGLIVNSVLLFLAFVVFLVTLAILTALRLCAYCCNIVNVSLVKPSFYVYSRVKLN  
TCTAAACGAAC MADSNGTITVEELKKLLEQWNLVIGFLFTWICLLQFAYANRNRFLYIIKLIFLWLLWPVTLACI  
ACGAACGCTT MFHLVDFQVTIAEILLIIMRTFKVSIWNLDYIINLIKNLSKSLTENKYSQLDEEQPMEID\*  
ACGAAC MKIILFLALITLATCELYHYQECVRGTTVLLKEPCSSGTYEGNSPFHPLADNKFALTCFSTQFAF/  
TCTAAACGAAC MSDNGPQNQRNAPRITFGGSPDSTGSNQNNGERSGARSKQRRPQGLPNNNTASWFTALTQF  
CTAAACGAAC MFVFLVLLPLVSSQCVNLTRTQLPPAYTNSFTRGVYYPDKVFRSSVLHSTQDLFLPFFSNVTV  
ACGAACTT MDLFMRIFTIGTVTLKQGEIKDATPSDFVRATATIPIQASLPFGWLIVGVALLAVFQSASKIITLI  
CTAAACGAAC MADSNGTITVEELKKLLEQWNLVIGFLFTWICLLQFAYANRNRFLYIIKLIFLWLLWPVTLACI  
ACGAACGCTT MFHLVDFQVTIAEILLIIMRTFKVSIWNLDYIINLIKNLSKSLTENKYSQLDEEQPMEID\*  
ACGAAC MKIILFLALITLATCELYHYQECVRGTTVLLKEPCSSGTYEGNSPFHPLADNKFALTCFSTQFAF/  
CTAAACGAAC MKFLVFLGIITTVAAAFHQECSLQSQCTQHQPYYVDDPCPIHFYSKWYIRVGARKSAPLIELCVDE  
TCTAAACGAAC MSDNGPQNQRNAPRITFGGSPDSTGSNQNNGERSGARSKQRRPQGLPNNNTASWFTALTQF  
CTAAACGAAC MFVFLVLLPLVSSQCVNLTRTQLPPAYTNSFTRGVYYPDKVFRSSVLHSTQDLFLPFFSNVTV  
ACGAACTT MDLFMRIFTIGTVTLKQGEIKDATPSDFVRATATIPIQASLPFGWLIVGVALLAVFQSASKIITLI  
CTAAACGAAC MADSNGTITVEELKKLLEQWNLVIGFLFTWICLLQFAYANRNRFLYIIKLIFLWLLWPVTLACI  
ACGAACGCTT MFHLVDFQVTIAEILLIIMRTFKVSIWNLDYIINLIKNLSKSLTENKYSQLDEEQPMEID\*  
ACGAAC MKIILFLALITLATCELYHYQECVRGTTVLLKEPCSSGTYEGNSPFHPLADNKFALTCFSTQFAF/  
CTAAACTGTT MIELSLIDFYLCFLAFLFLVLIIMLIIFWFSLELQDHNETCHA\*  
CTAAACGAAC MKFLVFLGIITTVAAAFHQECSLQSQCTQHQPYYVDDPCPIHFYSKWYIRVGARKSAPLIELCVDE  
TCTAAACGAAC MSDNGPQNQRNAPRITFGGSPDSTGSNQNNGERSGARSKQRRPQGLPNNNTASWFTALTQF  
CTAAACGAAC MFVFLVLLPLVSSQCVNLTRTQLPPAYTNSFTRGVYYPDKVFRSSVLHSTQDLFLPFFSNVTV  
CTAAACGAAC MADSNGTITVEELKKLLEQWNLVIGFLFTWICLLQFAYANRNRFLYIIKLIFLWLLWPVTLACI  
CTAAACTGTT MIELSLIDFYLCFLAFLFLVLIIMLIIFWFSLELQDHNETCHA\*  
AACAACTAAAC MSDNGPQNQRNAPRITFGGSPDSTGSNQNNGERSGARSKQRRPQGLPNNNTASWFTALTQF  
CTAAACGAAC MFVFLVLLPLVSSQCVNLTRTQLPPAYTNSFTRGVYYPDKVFRSSVLHSTQDLFLPFFSNVTV  
ACGAACTT MDLFMRIFTIGTVTLKQGEIKDATPSDFVRATATIPIQASLPFGWLIVGVALLAVFQSASKIITLI  
ACGAACTT MYSFVSEETGLIVNSVLLFLAFVVFLVTLAILTALRLCAYCCNIVNVSLVKPSFYVYSRVKLN  
TCTAAACGAAC MADSNGTITVEELKKLLEQWNLVIGFLFTWICLLQFAYANRNRFLYIIKLIFLWLLWPVTLACI  
ACGAACGCTT MFHLVDFQVTIAEILLIIMRTFKVSIWNLDYIINLIKNLSKSLTENKYSQLDEEQPMEID\*  
ACGAAC MKIILFLALITLATCELYHYQECVRGTTVLLKEPCSSGTYEGNSPFHPLADNKFALTCFSTQFAF/  
CTAAACGAAC MKFLVFLGIITTVAAAFHQECSLQSQCTQHQPYYVDDPCPIHFYSKWYIRVGARKSAPLIELCVDE  
CTAAACGAAC MSDNGPQNQRNAPRITFGGSPDSTGSNQNNGERSGARSKQRRPQGLPNNNTASWFTALTQF  
ACGAACTT MDLFMRIFTIGTVTLKQGEIKDATPSDFVRATATIPIQASLPFGWLIVGVALLAVFQSASKIITLI  
ACGAAC MKIILFLALITLATCELYHYQECVRGTTVLLKEPCSSGTYEGNSPFHPLADNKFALTCFSTQFAF/  
CTAAACGAAC MSDNGPQNQRNAPRITFGGSPDSTGSNQNNGERSGARSKQRRPQGLPNNNTASWFTALTQF

CTAAACGAAC(MADSNGTITVEELKKLLEQWNLVIGFLFTWICLLQFAYANRNRFLYIIKLIFLWLLWPVTLACI  
CTAAACGAAC(MSDNGPQNQRNAPRITFGGSPDSTGSNQNGERSGARSKQRRPQGLPNNTASWFTALTQF  
ACGAAC TT MDLFMRIFTIGTVTLKQGEIKDATPSDFVRATATIPIQASLPFGWLIVGVALLAVFQSASKIITL  
CTAAACGAAC(MADSNGTITVEELKKLLEQWNLVIGFLFTWICLLQFAYANRNRFLYIIKLIFLWLLWPVTLACI  
CTAAACGAAC(MSDNGPQNQRNAPRITFGGSPDSTGSNQNGERSGARSKQRRPQGLPNNTASWFTALTQF  
ACGAAC TT MDLFMRIFTIGTVTLKQGEIKDATPSDFVRATATIPIQASLPFGWLIVGVALLAVFQSASKIITL  
ACGAACGCTT MFHLVDFQVTIAEILLIIMRTFKVSIWNLDYIINLIKNLSKSLTENKYSQLDEEQPMEID\*  
ACGAAC MKIILFLALITLATCELYHYQECVRGTTVLLKEPCSSGTYEGNSPFHPLADNKFALTCFSTQFAF/  
CTAAACGAAC(MSDNGPQNQRNAPRITFGGSPDSTGSNQNGERSGARSKQRRPQGLPNNTASWFTALTQF  
AAC” indicates if there is a ACGAAC sequence in the “TRS\_seq” (TRS sequences), “20\_leader\_seq

MFHAIHVSGTNGTKRFDNPVLPFNDGVYFASTEKSNIIRGWIFGTTLDSKTQSLIVNNATNVVIKVCEFQFCNI  
KKRWQLALSkgVHFVCNLLLLFVTVYSHLLLVAAGLEAPFLYLYALVYFLQSINFVRIIMRLWLCWKCRSKNPLL  
ISSRVPDLLV\*

FVLAAYRINWITGGIAIAMAACLVLGMWLSYFIASFRLFARTRSMWSFNPETNILLNVPLHGTILTRPPESELV  
†GKEDLKFPRGQGVPIINTNSSPDDQIGYYRRATRRIRGGDGKMKDLSRWYFYLLGTGPEAGLPYGANKDGI  
MFHAIHVSGTNGTKRFDNPVLPFNDGVYFASTEKSNIIRGWIFGTTLDSKTQSLIVNNATNVVIKVCEFQFCNI  
KKRWQLALSkgVHFVCNLLLLFVTVYSHLLLVAAGLEAPFLYLYALVYFLQSINFVRIIMRLWLCWKCRSKNPLL  
ISSRVPDLLV\*

FVLAAYRINWITGGIAIAMAACLVLGMWLSYFIASFRLFARTRSMWSFNPETNILLNVPLHGTILTRPPESELV

ACPDGVKHHVYQLRARSVSPKLFIRQEEVQELYSPIFLIVAAIVFITLCFTLKRKTE\*  
†GKEDLKFPRGQGVPIINTNSSPDDQIGYYRRATRRIRGGDGKMKDLSRWYFYLLGTGPEAGLPYGANKDGI  
MFHAIHVSGTNGTKRFDNPVLPFNDGVYFASTEKSNIIRGWIFGTTLDSKTQSLIVNNATNVVIKVCEFQFCNI  
KKRWQLALSkgVHFVCNLLLLFVTVYSHLLLVAAGLEAPFLYLYALVYFLQSINFVRIIMRLWLCWKCRSKNPLL  
FVLAAYRINWITGGIAIAMAACLVLGMWLSYFIASFRLFARTRSMWSFNPETNILLNVPLHGTILTRPPESELV

ACPDGVKHHVYQLRARSVSPKLFIRQEEVQELYSPIFLIVAAIVFITLCFTLKRKTE\*  
‡AGSKSPIQYIDIGNYTVSCLPFTINCQEPKLGSLVVRCSFYEDFLEYHDVRVVLDFI\*  
†GKEDLKFPRGQGVPIINTNSSPDDQIGYYRRATRRIRGGDGKMKDLSRWYFYLLGTGPEAGLPYGANKDGI  
MFHAIHVSGTNGTKRFDNPVLPFNDGVYFASTEKSNIIRGWIFGTTLDSKTQSLIVNNATNVVIKVCEFQFCNI  
KKRWQLALSkgVHFVCNLLLLFVTVYSHLLLVAAGLEAPFLYLYALVYFLQSINFVRIIMRLWLCWKCRSKNPLL  
FVLAAYRINWITGGIAIAMAACLVLGMWLSYFIASFRLFARTRSMWSFNPETNILLNVPLHGTILTRPPESELV

ACPDGVKHHVYQLRARSVSPKLFIRQEEVQELYSPIFLIVAAIVFITLCFTLKRKTE\*  
‡AGSKSPIQYIDIGNYTVSCLPFTINCQEPKLGSLVVRCSFYEDFLEYHDVRVVLDFI\*  
†GKEDLKFPRGQGVPIINTNSSPDDQIGYYRRATRRIRGGDGKMKDLSRWYFYLLGTGPEAGLPYGANKDGI  
MFHAIHVSGTNGTKRFDNPVLPFNDGVYFASTEKSNIIRGWIFGTTLDSKTQSLIVNNATNVVIKVCEFQFCNI  
FVLAAYRINWITGGIAIAMAACLVLGMWLSYFIASFRLFARTRSMWSFNPETNILLNVPLHGTILTRPPESELV

†GKEDLKFPRGQGVPIINTNSSPDDQIGYYRRATRRIRGGDGKMKDLSRWYFYLLGTGPEAGLPYGANKDGI  
MFHAIHVSGTNGTKRFDNPVLPFNDGVYFASTEKSNIIRGWIFGTTLDSKTQSLIVNNATNVVIKVCEFQFCNI  
KKRWQLALSkgVHFVCNLLLLFVTVYSHLLLVAAGLEAPFLYLYALVYFLQSINFVRIIMRLWLCWKCRSKNPLL  
ISSRVPDLLV\*

FVLAAYRINWITGGIAIAMAACLVLGMWLSYFIASFRLFARTRSMWSFNPETNILLNVPLHGTILTRPPESELV

ACPDGVKHHVYQLRARSVSPKLFIRQEEVQELYSPIFLIVAAIVFITLCFTLKRKTE\*  
‡AGSKSPIQYIDIGNYTVSCLPFTINCQEPKLGSLVVRCSFYEDFLEYHDVRVVLDFI\*  
†GKEDLKFPRGQGVPIINTNSSPDDQIGYYRRATRRIRGGDGKMKDLSRWYFYLLGTGPEAGLPYGANKDGI  
KKRWQLALSkgVHFVCNLLLLFVTVYSHLLLVAAGLEAPFLYLYALVYFLQSINFVRIIMRLWLCWKCRSKNPLL  
ACPDGVKHHVYQLRARSVSPKLFIRQEEVQELYSPIFLIVAAIVFITLCFTLKRKTE\*  
†GKEDLKFPRGQGVPIINTNSSPDDQIGYYRRATRRIRGGDGKMKDLSRWYFYLLGTGPEAGLPYGANKDGI

FVLAAYRINWITGGIAIAMAACLVGLMWLSYFIASFRLFARTRSMWSFNPETNILLNVPLHGTILTRP LLESELV  
HGKEDLKFPRGQGV PINTNSSPDDQIGYYRRATRIRGGDGKMKDLSRWYFYLLGTGPEAGLPYGANKDGII  
KKRWQLALSKGVHFVCNLLLLFVTVYSHLLLVAAGLEAPFLYLYALVYFLQSINFVRIIMRLWLCWKCRSKNPLL  
FVLAAYRINWITGGIAIAMAACLVGLMWLSYFIASFRLFARTRSMWSFNPETNILLNVPLHGTILTRP LLESELV  
HGKEDLKFPRGQGV PINTNSSPDDQIGYYRRATRIRGGDGKMKDLSRWYFYLLGTGPEAGLPYGANKDGII  
KKRWQLALSKGVHFVCNLLLLFVTVYSHLLLVAAGLEAPFLYLYALVYFLQSINFVRIIMRLWLCWKCRSKNPLL

ACPDGVKHVYQLRARSVSPKLFIRQEEVQELYSPIFLIVAAIVFITLCFTLKRKTE\*

HGKEDLKFPRGQGV PINTNSSPDDQIGYYRRATRIRGGDGKMKDLSRWYFYLLGTGPEAGLPYGANKDGII

q” refers to the 20 nucleotides before the end of leader, and “AUG\_ postion” and “first\_orf\_aa”

DPFLGVYYHKNNKSWMESEFRVYSSANNCTFEYVSQPFLMDLEGKQGNFKNLREFVFKNIDGYFKIYSKHTPI  
.YDANYFLCWHTNCYDYCIPYNSVTSSIVITSGDGTTSPISEHDYQIGGYTEKWESGVKDCVVLHSYFTSDYYQL'

IGAVILRGHLRIAGHHLGRCDIKDLPKEITVATSRTLSYYKLGASQRVAGDSGFAAYSRYRIGNYKLNTDHSSSSSE  
IWWATEGALNTPKDHIGTRNPANNAIIVLQLPQGTTLPKGFYAEGSRGGSQASSRSSSRNSSRNSTPGSSR  
DPFLGVYYHKNNKSWMESEFRVYSSANNCTFEYVSQPFLMDLEGKQGNFKNLREFVFKNIDGYFKIYSKHTPI  
.YDANYFLCWHTNCYDYCIPYNSVTSSIVITSGDGTTSPISEHDYQIGGYTEKWESGVKDCVVLHSYFTSDYYQL'

IGAVILRGHLRIAGHHLGRCDIKDLPKEITVATSRTLSYYKLGASQRVAGDSGFAAYSRYRIGNYKLNTDHSSSSSE

IWWATEGALNTPKDHIGTRNPANNAIIVLQLPQGTTLPKGFYAEGSRGGSQASSRSSSRNSSRNSTPGSSR  
DPFLGVYYHKNNKSWMESEFRVYSSANNCTFEYVSQPFLMDLEGKQGNFKNLREFVFKNIDGYFKIYSKHTPI  
.YDANYFLCWHTNCYDYCIPYNSVTSSIVITSGDGTTSPISEHDYQIGGYTEKWESGVKDCVVLHSYFTSDYYQL'  
IGAVILRGHLRIAGHHLGRCDIKDLPKEITVATSRTLSYYKLGASQRVAGDSGFAAYSRYRIGNYKLNTDHSSSSSE

IWWATEGALNTPKDHIGTRNPANNAIIVLQLPQGTTLPKGFYAEGSRGGSQASSRSSSRNSSRNSTPGSSR  
DPFLGVYYHKNNKSWMESEFRVYSSANNCTFEYVSQPFLMDLEGKQGNFKNLREFVFKNIDGYFKIYSKHTPI  
.YDANYFLCWHTNCYDYCIPYNSVTSSIVITSGDGTTSPISEHDYQIGGYTEKWESGVKDCVVLHSYFTSDYYQL'  
IGAVILRGHLRIAGHHLGRCDIKDLPKEITVATSRTLSYYKLGASQRVAGDSGFAAYSRYRIGNYKLNTDHSSSSSE

IWWATEGALNTPKDHIGTRNPANNAIIVLQLPQGTTLPKGFYAEGSRGGSQASSRSSSRNSSRNSTPGSSR  
DPFLGVYYHKNNKSWMESEFRVYSSANNCTFEYVSQPFLMDLEGKQGNFKNLREFVFKNIDGYFKIYSKHTPI  
IGAVILRGHLRIAGHHLGRCDIKDLPKEITVATSRTLSYYKLGASQRVAGDSGFAAYSRYRIGNYKLNTDHSSSSSE

IWWATEGALNTPKDHIGTRNPANNAIIVLQLPQGTTLPKGFYAEGSRGGSQASSRSSSRNSSRNSTPGSSR  
DPFLGVYYHKNNKSWMESEFRVYSSANNCTFEYVSQPFLMDLEGKQGNFKNLREFVFKNIDGYFKIYSKHTPI  
.YDANYFLCWHTNCYDYCIPYNSVTSSIVITSGDGTTSPISEHDYQIGGYTEKWESGVKDCVVLHSYFTSDYYQL'

IGAVILRGHLRIAGHHLGRCDIKDLPKEITVATSRTLSYYKLGASQRVAGDSGFAAYSRYRIGNYKLNTDHSSSSSE

IWWATEGALNTPKDHIGTRNPANNAIIVLQLPQGTTLPKGFYAEGSRGGSQASSRSSSRNSSRNSTPGSSR  
.YDANYFLCWHTNCYDYCIPYNSVTSSIVITSGDGTTSPISEHDYQIGGYTEKWESGVKDCVVLHSYFTSDYYQL'

IWWATEGALNTPKDHIGTRNPANNAIIVLQLPQGTTLPKGFYAEGSRGGSQASSRSSSRNSSRNSTPGSSR

IGAVILRGHLRIAGHHLGRCDIKDLPKEITVATSRTLSYYKLGASQRVAGDSGFAAYSRYRIGNYKLNTDHSSSSSE  
I WVATEGALNTPKDHIGTRNPANNAIVLQLPQGTTLPKGFYAEGSRGGSQASSRSSSRN SSRNSTPGSSR  
.YDANYFLCWHTNCYDYCIPYNSVTSSIVITSGDGTTSPISEHDYQIGGYTEKWESGVKDCVVLHSYFTSDYYQL'  
IGAVILRGHLRIAGHHLGRCDIKDLPKEITVATSRTLSYYKLGASQRVAGDSGFAAYSRYRIGNYKLNTDHSSSSSE  
I WVATEGALNTPKDHIGTRNPANNAIVLQLPQGTTLPKGFYAEGSRGGSQASSRSSSRN SSRNSTPGSSR  
.YDANYFLCWHTNCYDYCIPYNSVTSSIVITSGDGTTSPISEHDYQIGGYTEKWESGVKDCVVLHSYFTSDYYQL'

I WVATEGALNTPKDHIGTRNPANNAIVLQLPQGTTLPKGFYAEGSRGGSQASSRSSSRN SSRNSTPGSSR  
refer to the first AUG position and translated orf of the sgmRNA.

INLVRDLPQGFSALEPLVDLPIGINITRFQTLALHRSYLTGDSGGWTAGAAAYVGYLQPRTFLLKYNENGTI  
YSTQLSTDTGVEHVTFEYFNKIVDEPEEHVQIHTIDGSSGVVNPVMEPIYDEPTTTTTSVPL\*

DNIALLVQ\*

GTSPARMAGNGGDAALALLLDRLNQLESKMSGKGQQQGGQTVTKKSAEASKKPRQKRTATKAYNVTQ/  
INLVRDLPQGFSALEPLVDLPIGINITRFQTLALHRSYLTGDSGGWTAGAAAYVGYLQPRTFLLKYNENGTI  
YSTQLSTDTGVEHVTFEYFNKIVDEPEEHVQIHTIDGSSGVVNPVMEPIYDEPTTTTTSVPL\*

DNIALLVQ\*

GTSPARMAGNGGDAALALLLDRLNQLESKMSGKGQQQGGQTVTKKSAEASKKPRQKRTATKAYNVTQ/  
INLVRDLPQGFSALEPLVDLPIGINITRFQTLALHRSYLTGDSGGWTAGAAAYVGYLQPRTFLLKYNENGTI  
YSTQLSTDTGVEHVTFEYFNKIVDEPEEHVQIHTIDGSSGVVNPVMEPIYDEPTTTTTSVPL\*

DNIALLVQ\*

GTSPARMAGNGGDAALALLLDRLNQLESKMSGKGQQQGGQTVTKKSAEASKKPRQKRTATKAYNVTQ/  
INLVRDLPQGFSALEPLVDLPIGINITRFQTLALHRSYLTGDSGGWTAGAAAYVGYLQPRTFLLKYNENGTI  
YSTQLSTDTGVEHVTFEYFNKIVDEPEEHVQIHTIDGSSGVVNPVMEPIYDEPTTTTTSVPL\*

DNIALLVQ\*

GTSPARMAGNGGDAALALLLDRLNQLESKMSGKGQQQGGQTVTKKSAEASKKPRQKRTATKAYNVTQ/  
INLVRDLPQGFSALEPLVDLPIGINITRFQTLALHRSYLTGDSGGWTAGAAAYVGYLQPRTFLLKYNENGTI  
DNIALLVQ\*

GTSPARMAGNGGDAALALLLDRLNQLESKMSGKGQQQGGQTVTKKSAEASKKPRQKRTATKAYNVTQ/  
INLVRDLPQGFSALEPLVDLPIGINITRFQTLALHRSYLTGDSGGWTAGAAAYVGYLQPRTFLLKYNENGTI  
YSTQLSTDTGVEHVTFEYFNKIVDEPEEHVQIHTIDGSSGVVNPVMEPIYDEPTTTTTSVPL\*

DNIALLVQ\*

GTSPARMAGNGGDAALALLLDRLNQLESKMSGKGQQQGGQTVTKKSAEASKKPRQKRTATKAYNVTQ/  
YSTQLSTDTGVEHVTFEYFNKIVDEPEEHVQIHTIDGSSGVVNPVMEPIYDEPTTTTTSVPL\*

GTSPARMAGNGGDAALALLLDRLNQLESKMSGKGQQQGGQTVTKKSAEASKKPRQKRTATKAYNVTQ/

NIALLVQ\*

GTSPARMAGNGGDAALALLLDRLNQLESKMSGKGQQQGGQTVTKKSAAEASKKPRQKRTATKAYNVTQ/  
YSTQLSTDTGVEHVTFEYKIVDEPEEHVQIHTIDGSSGVVNPVMEPIYDEPTTTTSVPL\*

NIALLVQ\*

GTSPARMAGNGGDAALALLLDRLNQLESKMSGKGQQQGGQTVTKKSAAEASKKPRQKRTATKAYNVTQ/  
YSTQLSTDTGVEHVTFEYKIVDEPEEHVQIHTIDGSSGVVNPVMEPIYDEPTTTTSVPL\*

GTSPARMAGNGGDAALALLLDRLNQLESKMSGKGQQQGGQTVTKKSAAEASKKPRQKRTATKAYNVTQ/



ITDAVDCALDPLSETKCTLKSFTVEKGIYQTSNFRVQPTESIVRFPNITNLCPFGEVFNATRFASVYAWNRKRIS

AFGRRGPEQTQGNFGDQELIRQGTDYKHWPQIAQFAPSASAFFGMSRIGMEVTPSGTWLTYTGAIKLDDKD  
ITDAVDCALDPLSETKCTLKSFTVEKGIYQTSNFRVQPTESIVRFPNITNLCPFGEVFNATRFASVYAWNRKRIS

AFGRRGPEQTQGNFGDQELIRQGTDYKHWPQIAQFAPSASAFFGMSRIGMEVTPSGTWLTYTGAIKLDDKD  
ITDAVDCALDPLSETKCTLKSFTVEKGIYQTSNFRVQPTESIVRFPNITNLCPFGEVFNATRFASVYAWNRKRIS

AFGRRGPEQTQGNFGDQELIRQGTDYKHWPQIAQFAPSASAFFGMSRIGMEVTPSGTWLTYTGAIKLDDKD  
ITDAVDCALDPLSETKCTLKSFTVEKGIYQTSNFRVQPTESIVRFPNITNLCPFGEVFNATRFASVYAWNRKRIS

AFGRRGPEQTQGNFGDQELIRQGTDYKHWPQIAQFAPSASAFFGMSRIGMEVTPSGTWLTYTGAIKLDDKD  
ITDAVDCALDPLSETKCTLKSFTVEKGIYQTSNFRVQPTESIVRFPNITNLCPFGEVFNATRFASVYAWNRKRIS

AFGRRGPEQTQGNFGDQELIRQGTDYKHWPQIAQFAPSASAFFGMSRIGMEVTPSGTWLTYTGAIKLDDKD  
ITDAVDCALDPLSETKCTLKSFTVEKGIYQTSNFRVQPTESIVRFPNITNLCPFGEVFNATRFASVYAWNRKRIS

AFGRRGPEQTQGNFGDQELIRQGTDYKHWPQIAQFAPSASAFFGMSRIGMEVTPSGTWLTYTGAIKLDDKD

AFGRRGPEQTQGNFGDQELIRQGTDYKHWPQIAQFAPSASAFFGMSRIGMEVTPSGTWLTYTGAIKLDDKD

AFGRRGPEQTQGNFGDQELIRQGTDYKHWPQIAQFAPSASAFFGMSRIGMEVTPSGTWLTYTGAIKLDDKD

AFGRRGPEQTQGNFGDQELIRQGTDYKHWPQIAQFAPSASAFFGMSRIGMEVTPSGTWLTYTGAIKLDDKD

AFGRRGPEQTQGNFGDQELIRQGTDYKHWPQIAQFAPSASAFFGMSRIGMEVTPSGTWLTYTGAIKLDDKD

√CVADYSVLYNSASFSTFKCYGVSPKLNLCFTNVYADSFVIRGDEVQRQIAPGQTGKIADYNYKLPDDFTGCV

√PNFKDQVILLNKHIDAYKTFPPTPEPKDKKKKKADETQALPQRQKKQQTVTLLPAADLDDFSKQLQQSMSSAD  
√CVADYSVLYNSASFSTFKCYGVSPKLNLCFTNVYADSFVIRGDEVQRQIAPGQTGKIADYNYKLPDDFTGCV

√PNFKDQVILLNKHIDAYKTFPPTPEPKDKKKKKADETQALPQRQKKQQTVTLLPAADLDDFSKQLQQSMSSAD  
√CVADYSVLYNSASFSTFKCYGVSPKLNLCFTNVYADSFVIRGDEVQRQIAPGQTGKIADYNYKLPDDFTGCV

√PNFKDQVILLNKHIDAYKTFPPTPEPKDKKKKKADETQALPQRQKKQQTVTLLPAADLDDFSKQLQQSMSSAD  
√CVADYSVLYNSASFSTFKCYGVSPKLNLCFTNVYADSFVIRGDEVQRQIAPGQTGKIADYNYKLPDDFTGCV

√PNFKDQVILLNKHIDAYKTFPPTPEPKDKKKKKADETQALPQRQKKQQTVTLLPAADLDDFSKQLQQSMSSAD  
√CVADYSVLYNSASFSTFKCYGVSPKLNLCFTNVYADSFVIRGDEVQRQIAPGQTGKIADYNYKLPDDFTGCV

√PNFKDQVILLNKHIDAYKTFPPTPEPKDKKKKKADETQALPQRQKKQQTVTLLPAADLDDFSKQLQQSMSSAD  
√CVADYSVLYNSASFSTFKCYGVSPKLNLCFTNVYADSFVIRGDEVQRQIAPGQTGKIADYNYKLPDDFTGCV

√PNFKDQVILLNKHIDAYKTFPPTPEPKDKKKKKADETQALPQRQKKQQTVTLLPAADLDDFSKQLQQSMSSAD

√PNFKDQVILLNKHIDAYKTFPPTPEPKDKKKKKADETQALPQRQKKQQTVTLLPAADLDDFSKQLQQSMSSAD

PNFKDQVILLNKHIDAYKTFPPTEPKKDKKKKADETQALPQRQKKQQTVTLLPAADLDDFSKQLQQSMSSAD

PNFKDQVILLNKHIDAYKTFPPTEPKKDKKKKADETQALPQRQKKQQTVTLLPAADLDDFSKQLQQSMSSAD

PNFKDQVILLNKHIDAYKTFPPTEPKKDKKKKADETQALPQRQKKQQTVTLLPAADLDDFSKQLQQSMSSAD

IAWNSNNLDSKVGGNYNYLYRLFRKSNLKPFERDISTEIQAGSTPCNGVEGFNCYFPLQSYGFQPTNGVGYC

STQA\*

IAWNSNNLDSKVGGNYNYLYRLFRKSNLKPFERDISTEIQAGSTPCNGVEGFNCYFPLQSYGFQPTNGVGYC

STQA\*

IAWNSNNLDSKVGGNYNYLYRLFRKSNLKPFERDISTEIQAGSTPCNGVEGFNCYFPLQSYGFQPTNGVGYC

STQA\*

IAWNSNNLDSKVGGNYNYLYRLFRKSNLKPFERDISTEIQAGSTPCNGVEGFNCYFPLQSYGFQPTNGVGYC

STQA\*

IAWNSNNLDSKVGGNYNYLYRLFRKSNLKPFERDISTEIQAGSTPCNGVEGFNCYFPLQSYGFQPTNGVGYC

STQA\*

IAWNSNNLDSKVGGNYNYLYRLFRKSNLKPFERDISTEIQAGSTPCNGVEGFNCYFPLQSYGFQPTNGVGYC

STQA\*

STQA\*

STQA\*

STQA\*

STQA\*

QPYRVVLSFELLHAPATVCGPKKSTNLVKNKCVNFNFNGLTGTGVLTESNKKFLPFQQFGRDIADTTDAVRDI

QPYRVVLSFELLHAPATVCGPKKSTNLVKNKCVNFNFNGLTGTGVLTESNKKFLPFQQFGRDIADTTDAVRDI

QPYRVVLSFELLHAPATVCGPKKSTNLVKNKCVNFNFNGLTGTGVLTESNKKFLPFQQFGRDIADTTDAVRDI

QPYRVVLSFELLHAPATVCGPKKSTNLVKNKCVNFNFNGLTGTGVLTESNKKFLPFQQFGRDIADTTDAVRDI

QPYRVVLSFELLHAPATVCGPKKSTNLVKNKCVNFNFNGLTGTGVLTESNKKFLPFQQFGRDIADTTDAVRDI

QPYRVVLSFELLHAPATVCGPKKSTNLVKNKCVNFNFNGLTGTGVLTESNKKFLPFQQFGRDIADTTDAVRDI





PQLEILDITPCSFGGVSVITPGTNTSNQVAVLYQDVNCTEVPVAIHADQLTPTWRVYSTGSNVFQTRAGCLIC

PQLEILDITPCSFGGVSVITPGTNTSNQVAVLYQDVNCTEVPVAIHADQLTPTWRVYSTGSNVFQTRAGCLIC

PQLEILDITPCSFGGVSVITPGTNTSNQVAVLYQDVNCTEVPVAIHADQLTPTWRVYSTGSNVFQTRAGCLIC

PQLEILDITPCSFGGVSVITPGTNTSNQVAVLYQDVNCTEVPVAIHADQLTPTWRVYSTGSNVFQTRAGCLIC

PQLEILDITPCSFGGVSVITPGTNTSNQVAVLYQDVNCTEVPVAIHADQLTPTWRVYSTGSNVFQTRAGCLIC

PQLEILDITPCSFGGVSVITPGTNTSNQVAVLYQDVNCTEVPVAIHADQLTPTWRVYSTGSNVFQTRAGCLIC



3AEHVNNSYECDIPIGAGICASYQTQTNSPRRARSVASQSIIAYTMSLGAENSVAYSNNSIAIPTNFTISVTTEILP

3AEHVNNSYECDIPIGAGICASYQTQTNSPRRARSVASQSIIAYTMSLGAENSVAYSNNSIAIPTNFTISVTTEILP

3AEHVNNSYECDIPIGAGICASYQTQTNSPRRARSVASQSIIAYTMSLGAENSVAYSNNSIAIPTNFTISVTTEILP

3AEHVNNSYECDIPIGAGICASYQTQTNSPRRARSVASQSIIAYTMSLGAENSVAYSNNSIAIPTNFTISVTTEILP

3AEHVNNSYECDIPIGAGICASYQTQTNSPRRARSVASQSIIAYTMSLGAENSVAYSNNSIAIPTNFTISVTTEILP

3AEHVNNSYECDIPIGAGICASYQTQTNSPRRARSVASQSIIAYTMSLGAENSVAYSNNSIAIPTNFTISVTTEILP



'VSMTKTSVDCTMYICGDSTECSNLLLQYGSFCTQLNRALTGIAVEQDKNTQEVFAQVKQIYKTPPIKDFGGFN

'VSMTKTSVDCTMYICGDSTECSNLLLQYGSFCTQLNRALTGIAVEQDKNTQEVFAQVKQIYKTPPIKDFGGFN

'VSMTKTSVDCTMYICGDSTECSNLLLQYGSFCTQLNRALTGIAVEQDKNTQEVFAQVKQIYKTPPIKDFGGFN

'VSMTKTSVDCTMYICGDSTECSNLLLQYGSFCTQLNRALTGIAVEQDKNTQEVFAQVKQIYKTPPIKDFGGFN

'VSMTKTSVDCTMYICGDSTECSNLLLQYGSFCTQLNRALTGIAVEQDKNTQEVFAQVKQIYKTPPIKDFGGFN

'VSMTKTSVDCTMYICGDSTECSNLLLQYGSFCTQLNRALTGIAVEQDKNTQEVFAQVKQIYKTPPIKDFGGFN



JFSQILPDPSKPSKRSFIEDLLFNKVTLADAGFIKQYGDCLGDIAARDLICAQKFNGLTVLPPLLTDEMIAQYTSAL

JFSQILPDPSKPSKRSFIEDLLFNKVTLADAGFIKQYGDCLGDIAARDLICAQKFNGLTVLPPLLTDEMIAQYTSAL

JFSQILPDPSKPSKRSFIEDLLFNKVTLADAGFIKQYGDCLGDIAARDLICAQKFNGLTVLPPLLTDEMIAQYTSAL

JFSQILPDPSKPSKRSFIEDLLFNKVTLADAGFIKQYGDCLGDIAARDLICAQKFNGLTVLPPLLTDEMIAQYTSAL

JFSQILPDPSKPSKRSFIEDLLFNKVTLADAGFIKQYGDCLGDIAARDLICAQKFNGLTVLPPLLTDEMIAQYTSAL

JFSQILPDPSKPSKRSFIEDLLFNKVTLADAGFIKQYGDCLGDIAARDLICAQKFNGLTVLPPLLTDEMIAQYTSAL





LLAGTITSGWTFGAGAALQIPFAMQMAYRFNGIGVTQNVLYENQKLIANQFNSAIGKIQDLSSTASALGKLO

LLAGTITSGWTFGAGAALQIPFAMQMAYRFNGIGVTQNVLYENQKLIANQFNSAIGKIQDLSSTASALGKLO

LLAGTITSGWTFGAGAALQIPFAMQMAYRFNGIGVTQNVLYENQKLIANQFNSAIGKIQDLSSTASALGKLO

LLAGTITSGWTFGAGAALQIPFAMQMAYRFNGIGVTQNVLYENQKLIANQFNSAIGKIQDLSSTASALGKLO

LLAGTITSGWTFGAGAALQIPFAMQMAYRFNGIGVTQNVLYENQKLIANQFNSAIGKIQDLSSTASALGKLO

LLAGTITSGWTFGAGAALQIPFAMQMAYRFNGIGVTQNVLYENQKLIANQFNSAIGKIQDLSSTASALGKLO



!DVVNQNAQALNTLVKQLSSNFGAISSVLNDILSRLDKVEAEVQIDRLITGRLQSLQTYVTQQLIRAAEIRASANI

!DVVNQNAQALNTLVKQLSSNFGAISSVLNDILSRLDKVEAEVQIDRLITGRLQSLQTYVTQQLIRAAEIRASANI

!DVVNQNAQALNTLVKQLSSNFGAISSVLNDILSRLDKVEAEVQIDRLITGRLQSLQTYVTQQLIRAAEIRASANI

!DVVNQNAQALNTLVKQLSSNFGAISSVLNDILSRLDKVEAEVQIDRLITGRLQSLQTYVTQQLIRAAEIRASANI

!DVVNQNAQALNTLVKQLSSNFGAISSVLNDILSRLDKVEAEVQIDRLITGRLQSLQTYVTQQLIRAAEIRASANI

!DVVNQNAQALNTLVKQLSSNFGAISSVLNDILSRLDKVEAEVQIDRLITGRLQSLQTYVTQQLIRAAEIRASANI



L

L

L

L

L

L

|          | subgenome | leader_end | TRS_start       | nb_count                  |
|----------|-----------|------------|-----------------|---------------------------|
| S1-Day1  | 1         | 74         | 21058           | 5381(5374,5368,5361,5332) |
| S2-Day2  | 1         | 46         | 26422           | 13(13,13,13,12)           |
|          | 2         | 48         | 26443           | 22(22,22,22,22)           |
| S3-Day3  | 1         | 46         | 26422           | 25(25,25,25,24)           |
|          | 2         | 58         | 26917           | 24(23,0,0,0)              |
|          | 3         | 63         | 5785            | 146(146,140,140,136)      |
|          | 4         | 65         | 10377           | 16(16,0,0,0)              |
|          | 5         | 65         | 10595           | 27(27,12,12,12)           |
|          | 6         | 47         | 26421           | 19(19,19,19,18)           |
|          | 7         | 68         | 5789            | 155(155,146,146,146)      |
|          | 8         | 69         | 3816            | 76(76,0,0,6)              |
|          | 9         | 69         | 13619           | 117(117,112,112,110)      |
|          | 10        | 69         | 19112           | 303(299,300,296,290)      |
|          | 11        | 70         | 13426           | 35(31,0,0,4)              |
|          | 12        | 70         | 14372           | 39(38,1,0,2)              |
|          | 13        | 48         | 26443           | 109(109,109,109,104)      |
|          | 14        | 70         | 17878           | 27(27,24,24,24)           |
|          | 15        | 70         | 22502           | 55(53,0,0,6)              |
|          | 16        | 71         | 5594            | 152(152,0,0,0)            |
|          | 17        | 71         | 5708            | 103(56,47,0,4)            |
|          | 18        | 71         | 22409           | 69(69,0,0,0)              |
| 19       | 74        | 15866      | 360(360,0,0,4)  |                           |
| 20       | 74        | 21058      | 84(84,82,82,82) |                           |
| S1-Day4  | 1         | 46         | 26422           | 18(18,18,18,18)           |
|          | 2         | 68         | 4580            | 453(450,439,436,440)      |
|          | 3         | 68         | 15777           | 434(433,5,4,6)            |
|          | 4         | 70         | 22502           | 151(151,0,0,4)            |
|          | 5         | 73         | 23098           | 1199(1194,2,2,16)         |
| S2-Day5  | 1         | 46         | 26422           | 14(14,14,14,14)           |
|          | 2         | 59         | 24304           | 13(13,0,0,0)              |
|          | 3         | 67         | 22503           | 304(303,1,1,6)            |
|          | 4         | 68         | 2689            | 113(94,112,93,84)         |
| S3-Day6  | 5         | 71         | 22409           | 669(669,0,0,6)            |
|          | 6         | 74         | 21058           | 1796(1793,1790,1787,1770) |
|          | 7         | 48         | 26443           | 40(40,40,40,40)           |
|          | 8         | 48         | 28184           | 22(22,0,0,0)              |
|          | 9         | 52         | 28249           | 384(293,382,291,2)        |
| S2-Day8  | 1         | 58         | 29871           | 17(0,0,0,0)               |
| S3-Day9  |           |            |                 |                           |
| S2-Day11 | 1         | 76         | 28267           | 13(12,12,11,0)            |
|          | 2         | 78         | 28269           | 29(29,29,29,0)            |

S3-Day12

S3-Day19    1                    58                    29871                    124(41,0,0,22)

The numbers in the bracket are (reads with left primers, reads with right primers, re:

Normalized count=(Read count/Total number of read mapped on reference genome

Total number of read mapped on reference genome is 32903734, 33694953, 334004

“leader\_end” and “TRS\_start” refer to the position of the end of leader and the posi

normalized\_count

163.54(163.32,163.14,162.93,162.05)

0.39(0.39,0.39,0.39,0.36)

0.65(0.65,0.65,0.65,0.65)

0.75(0.75,0.75,0.75,0.72)

0.72(0.69,0.00,0.00,0.00)

4.37(4.37,4.19,4.19,4.07)

0.48(0.48,0.00,0.00,0.00)

0.81(0.81,0.36,0.36,0.36)

0.57(0.57,0.57,0.57,0.54)

4.64(4.64,4.37,4.37,4.37)

2.28(2.28,0.00,0.00,0.18)

3.50(3.50,3.35,3.35,3.29)

9.07(8.95,8.98,8.86,8.68)

1.05(0.93,0.00,0.00,0.12)

1.17(1.14,0.03,0.00,0.06)

3.26(3.26,3.26,3.26,3.11)

0.81(0.81,0.72,0.72,0.72)

1.65(1.59,0.00,0.00,0.18)

4.55(4.55,0.00,0.00,0.00)

3.08(1.68,1.41,0.00,0.12)

2.07(2.07,0.00,0.00,0.00)

10.78(10.78,0.00,0.00,0.12)

2.51(2.51,2.46,2.46,2.46)

0.55(0.55,0.55,0.55,0.55)

13.86(13.77,13.43,13.34,13.46)

13.28(13.25,0.15,0.12,0.18)

4.62(4.62,0.00,0.00,0.12)

36.68(36.53,0.06,0.06,0.49)

0.43(0.43,0.43,0.43,0.43)

0.40(0.40,0.00,0.00,0.00)

9.25(9.22,0.03,0.03,0.18)

3.44(2.86,3.41,2.83,2.56)

20.36(20.36,0.00,0.00,0.18)

54.65(54.56,54.47,54.38,53.86)

1.22(1.22,1.22,1.22,1.22)

0.67(0.67,0.00,0.00,0.00)

11.68(8.92,11.62,8.85,0.06)

1.26(0.00,0.00,0.00,0.00)

1.31(1.21,1.21,1.11,0.00)

2.93(2.93,2.93,2.93,0.00)



7.92(2.62,0.00,0.00,1.41)

ads with both primers, same junction on paired reads with at least a primer).

)\*1000000.

485, 32686824, 17052923, 32864351, 13447115, 15951471, 9892701, 13862861, 12570298 and 15  
tion of the start of TRS identified in the reads >10.



653045, excluding the mapped reads unpaired, not primary alignment and supplementary align



ment.

|          | subgenome | leader_end | TRS_start | nb_count           | normalized_count            |
|----------|-----------|------------|-----------|--------------------|-----------------------------|
| S1-Day1  | 1         | 65         | 8436      | 64(64,8,8,56)      | 1.57(1.57,0.20,0.20,1.37)   |
|          | 2         | 65         | 10766     | 18(18,0,0,0)       | 0.44(0.44,0.00,0.00,0.00)   |
|          | 3         | 68         | 15777     | 573(573,0,0,0)     | 14.06(14.06,0.00,0.00,0.20) |
|          | 4         | 71         | 10772     | 368(368,0,0,0)     | 9.03(9.03,0.00,0.00,0.10)   |
| S2-Day2  | 1         | 46         | 26422     | 23(23,23,23,23)    | 0.66(0.66,0.66,0.66,0.64)   |
|          | 2         | 47         | 26421     | 14(14,14,14,14)    | 0.40(0.40,0.40,0.40,0.40)   |
|          | 3         | 75         | 26486     | 2311(2307,2166,78) | 66.66(62.67,62.61,64)       |
|          | 4         | 48         | 26443     | 34(34,34,34,34)    | 0.98(0.98,0.98,0.98,0.98)   |
| S3-Day3  | 1         | 62         | 3808      | 12(12,0,0,0)       | 0.37(0.37,0.00,0.00,0.00)   |
|          | 2         | 63         | 23922     | 72(64,8,0,0)       | 2.24(1.99,0.25,0.00,0.00)   |
|          | 3         | 66         | 14252     | 21(21,20,20,10)    | 0.65(0.65,0.62,0.62,0.56)   |
|          | 4         | 67         | 21083     | 84(84,84,84,84)    | 2.61(2.61,2.61,2.61,2.61)   |
|          | 5         | 69         | 3816      | 133(133,0,0,0)     | 4.13(4.13,0.00,0.00,0.19)   |
|          | 6         | 69         | 7186      | 224(224,4,4,2)     | 6.96(6.96,0.12,0.12,0.06)   |
|          | 7         | 69         | 18554     | 197(197,182,6)     | 6.12(6.12,5.66,5.66,6.03)   |
|          | 8         | 71         | 8201      | 212(212,206,6)     | 6.59(6.59,6.40,6.40,6.40)   |
|          | 9         | 48         | 26443     | 14(14,14,14,14)    | 0.44(0.44,0.44,0.44,0.44)   |
|          | 10        | 54         | 11370     | 28(19,0,0,0)       | 0.87(0.59,0.00,0.00,0.00)   |
| S1-Day4  | 1         | 46         | 26422     | 14(14,14,14,14)    | 0.43(0.43,0.43,0.43,0.43)   |
|          | 2         | 71         | 5594      | 1610(1610,2,49)    | 49.87(49.87,0.06,0.06,0.50) |
|          | 3         | 76         | 28267     | 12(12,11,11,11)    | 0.37(0.37,0.34,0.34,0.12)   |
|          | 4         | 48         | 26443     | 28(28,28,28,28)    | 0.87(0.87,0.87,0.87,0.87)   |
|          | 5         | 48         | 28184     | 18(18,0,0,0)       | 0.56(0.56,0.00,0.00,0.00)   |
| S2-Day5  | 1         | 48         | 28184     | 15(15,0,0,0)       | 0.52(0.52,0.00,0.00,0.00)   |
| S3-Day6  | 1         | 46         | 26422     | 20(20,20,20,20)    | 0.67(0.67,0.67,0.67,0.67)   |
|          | 2         | 71         | 27762     | 29(29,10,10,10)    | 0.96(0.96,0.33,0.33,0.40)   |
| S2-Day8  |           |            |           |                    |                             |
| S3-Day9  | 1         | 57         | 12988     | 31(29,30,28,11)    | 1.68(1.57,1.63,1.52,0.76)   |
|          | 2         | 58         | 12989     | 20151(19897,1093)  | 56(1079.77,1041.35,1)       |
| S2-Day11 |           |            |           |                    |                             |
| S3-Day12 |           |            |           |                    |                             |
| S3-Day15 |           |            |           |                    |                             |

The numbers in the bracket are (reads with left primers, reads with right primers, reads with both primers, reads with no primers).  
Normalized count=(Read count/Total number of read mapped on reference genome)\*1000000.  
Total number of read mapped on reference genome is 40751196, 34608693, 32168622, 322809  
“leader\_end” and “TRS\_start” refer to the position of the end of leader and the position of the start of TRS.

)

l.43)

)

.028.06,1045.20)

th primers, same junction on paired reads with at least a primer).

32, 28595139, 30056513, 29481101, 18427015, 17677974, 11329365, 10742292 and 12786655,  
start of TRS identified in the reads >10.

excluding the mapped reads unpaired, not primary alignment and supplementary alignment.



|          | subgenome | leader_end | TRS_start | ACGAAC | ATG_postion |
|----------|-----------|------------|-----------|--------|-------------|
| S1-Day1  | 1         | 74         | 21058     | no     | 21071       |
| S2-Day2  | 1         | 46         | 26422     | yes    | 26523       |
|          | 2         | 48         | 26443     | yes    | 26523       |
| S3-Day3  | 1         | 46         | 26422     | yes    | 26523       |
|          | 2         | 58         | 26917     | yes    | 27202       |
|          | 3         | 63         | 5785      | no     | 5859        |
|          | 4         | 65         | 10377     | no     | 10410       |
|          | 5         | 65         | 10595     | no     | 10599       |
|          | 6         | 47         | 26421     | yes    | 26523       |
|          | 7         | 68         | 5789      | no     | 5859        |
|          | 8         | 69         | 3816      | no     | 3842        |
|          | 9         | 69         | 13619     | no     | 13625       |
|          | 10        | 69         | 19112     | no     | 19148       |
|          | 11        | 70         | 13426     | no     | 13433       |
|          | 12        | 70         | 14372     | no     | 14381       |
|          | 13        | 48         | 26443     | yes    | 26523       |
|          | 14        | 70         | 17878     | no     | 17906       |
|          | 15        | 70         | 22502     | no     | 22614       |
|          | 16        | 71         | 5594      | no     | 5681        |
|          | 17        | 71         | 5708      | no     | 5718        |
|          | 18        | 71         | 22409     | no     | 22422       |
|          | 19        | 74         | 15866     | no     | 15869       |
| 20       | 74        | 21058      | no        | 21071  |             |
| S1-Day4  | 1         | 46         | 26422     | yes    | 26523       |
|          | 2         | 68         | 4580      | no     | 4590        |
|          | 3         | 68         | 15777     | no     | 15812       |
|          | 4         | 70         | 22502     | no     | 22614       |
|          | 5         | 73         | 23098     | no     | 23118       |
| S2-Day5  | 1         | 46         | 26422     | yes    | 26523       |
|          | 2         | 59         | 24304     | no     | 24312       |
|          | 3         | 67         | 22503     | no     | 22614       |
|          | 4         | 68         | 2689      | no     | 2745        |
| S3-Day6  | 5         | 71         | 22409     | no     | 22422       |
|          | 6         | 74         | 21058     | no     | 21071       |
|          | 7         | 48         | 26443     | yes    | 26523       |
|          | 8         | 48         | 28184     | no     | 28207       |
|          | 9         | 52         | 28249     | yes    | 28274       |
| S2-Day8  | 1         | 58         | 29871     | -      | -           |
| S3-Day9  |           |            |           |        |             |
| S2-Day11 | 1         | 76         | 28267     | no     | 28274       |
|          | 2         | 78         | 28269     | no     | 28274       |

S3-Day12

S3-Day19    1                            58                            29871                            -                            -

“peak\_leader” and “peak\_TRS\_start” point to the leader-TRS junctions in sheet "novel", “ACGAAC

| known_ATG | 20_leader_se         | TRS_seq     | first_orf_aa                       |
|-----------|----------------------|-------------|------------------------------------|
| -         | AGATCTGTTCCCTAAGACTA | MLQKKMTLKR  | VSLTFVGLYNKS*                      |
| M         | ACAAACCAAC           | TCTCGTGTTA  | MADSNGTITVEELKKLLEQWNLVIGFLFTW     |
| M         | AAACCAACC            | TCTTCTAGAG  | MADSNGTITVEELKKLLEQWNLVIGFLFTW     |
| M         | ACAAACCAAC           | TCTCGTGTTA  | MADSNGTITVEELKKLLEQWNLVIGFLFTW     |
| ORF6      | ACTTTCGATC           | CGCTTCTAGA  | MFHLVDFQVTIAEILLIIMRTFKVSIWNLDYIII |
| -         | CGATCTCTTG           | TTCTAAAGAA  | MFSTKKTVTQQP*                      |
| -         | ATCTCTTGTA           | CAGGACAGA   | MVHHLVFTNVL*                       |
| -         | ATCTCTTGTA           | TTTT        | MDLLLTGKQHKQLVRTQLLQLMF*           |
| M         | CAAACCAACC           | CTCTCGTGTT  | MADSNGTITVEELKKLLEQWNLVIGFLFTW     |
| -         | TCTTGATAGAT          | AAAGAACTI   | MFSTKKTVTQQP*                      |
| -         | CTTGATAGATC          | ACAACTTGT   | MKSEKQVEQKIAEIPKEEVKPFITESKPSVEQI  |
| -         | CTTGATAGATC          | ACGAAG      | MTI*                               |
| -         | CTTGATAGATC          | ACAAAGCTTA  | MPHILTNMQMVYAYFGIAMSIDILLIPLFVDL   |
| -         | TTGTAGATCT           | CGAACCC     | MLQSADAQSFLNGFAV*                  |
| -         | TTGTAGATCT           | CAAACCTTA   | MFYSLQCSHLQVLDH*                   |
| M         | AAACCAACC            | TCTTCTAGAG  | MADSNGTITVEELKKLLEQWNLVIGFLFTW     |
| -         | TTGTAGATCT           | CAAACCACTC  | M*                                 |
| -         | TTGTAGATCT           | CAAACCTCTA  | MLGTGRESATVLLIILSYIIPHHFPLLSVMECLI |
| -         | TGTAGATCTC           | GAACAATTTA  | MMSAPPAQYELKHGTFTCASEYTGNYQCGI     |
| -         | TGTAGATCTC           | GAACTTAAGC  | MVHLLVLVSTLIVTSVVTINI*             |
| -         | TGTAGATCTC           | GGAACCATT   | ML*                                |
| -         | AGATCTGTTCC          | CTC         | MNFALNIQC*                         |
| -         | AGATCTGTTCCCTAAGACTA | MLQKKMTLKR  | VSLTFVGLYNKS*                      |
| M         | ACAAACCAAC           | TCTCGTGTTA  | MADSNGTITVEELKKLLEQWNLVIGFLFTW     |
| -         | TCTTGATAGAT          | AACGATCTAA  | MKLLLQCHLAM*                       |
| -         | TCTTGATAGAT          | AAAGAACTTI  | MFLCLKQNVGLRLTLKDLMNFALNIQC*       |
| -         | TTGTAGATCT           | CAAACCTCTA  | MLGTGRESATVLLIILSYIIPHHFPLLSVMECLI |
| -         | TAGATCTGTT           | ACTTTCTTTT  | CMHQQLFVDLKSLLIWLKTNVSISTSMV*      |
| M         | ACAAACCAAC           | TCTCGTGTTA  | MADSNGTITVEELKKLLEQWNLVIGFLFTW     |
| -         | CTTTCGATCT           | TGTTCTCT    | MRTKN*                             |
| -         | CTCTTGATAGAA         | AACTTCTAA   | MLGTGRESATVLLIILSYIIPHHFPLLSVMECLI |
| -         | TCTTGATAGAT          | AACAAACAAI  | MTL*                               |
| -         | TGTAGATCTC           | GGAACCATT   | ML*                                |
| -         | AGATCTGTTCCCTAAGACTA | MLQKKMTLKR  | VSLTFVGLYNKS*                      |
| M         | AAACCAACC            | TCTTCTAGAG  | MADSNGTITVEELKKLLEQWNLVIGFLFTW     |
| -         | AAACCAACC            | TCTTGATAGTG | MKTF*                              |
| N         | CAACCAACTT           | ATTTTCATCTA | MSDNGPQNQRNAPRITFGGPSDSTGNSQN      |
| -         | -                    | -           | -                                  |
| N         | ATCTGTTCTC           | AACTAAA     | MSDNGPQNQRNAPRITFGGPSDSTGNSQN      |
| N         | CTGTTCTCTA           | CTAAA       | MSDNGPQNQRNAPRITFGGPSDSTGNSQN      |

- - - -  
" indicates if there is a ACGAAC sequences in the "TRS\_seq" (TRS sequences), "20\_leader\_seq" r

'ICLLQFAYANRNRFLYIIKLIFLWLLWPVTLACFVLAAYRINWITGGIAIAMAACLVGLMWLSYFIASFRLFARTF  
'ICLLQFAYANRNRFLYIIKLIFLWLLWPVTLACFVLAAYRINWITGGIAIAMAACLVGLMWLSYFIASFRLFARTF  
'ICLLQFAYANRNRFLYIIKLIFLWLLWPVTLACFVLAAYRINWITGGIAIAMAACLVGLMWLSYFIASFRLFARTF  
NLIKNLSKSLTENKYSQLDEEQPMEID\*

'ICLLQFAYANRNRFLYIIKLIFLWLLWPVTLACFVLAAYRINWITGGIAIAMAACLVGLMWLSYFIASFRLFARTF  
  
RKQDDKKIKACVEEVTTTLEETKFLTENLLLYIDINGNLHPDSATLVSDIDITFLKKDAPYIVGDVVGQEGVLTAVVI  
  
TLECYLTLTCLVVMVAVCM\*

'ICLLQFAYANRNRFLYIIKLIFLWLLWPVTLACFVLAAYRINWITGGIAIAMAACLVGLMWLSYFIASFRLFARTF  
  
.LN\*  
-YKHITSKETLYCIDGALLTKSSEYKGPITDVFYKENSYTTTIKPVTYKLDGVVCTEIDPKLDNYYKKDNSYFTEQPI

'ICLLQFAYANRNRFLYIIKLIFLWLLWPVTLACFVLAAYRINWITGGIAIAMAACLVGLMWLSYFIASFRLFARTF  
  
.LN\*

'ICLLQFAYANRNRFLYIIKLIFLWLLWPVTLACFVLAAYRINWITGGIAIAMAACLVGLMWLSYFIASFRLFARTF  
  
.LN\*

'ICLLQFAYANRNRFLYIIKLIFLWLLWPVTLACFVLAAYRINWITGGIAIAMAACLVGLMWLSYFIASFRLFARTF  
  
IGERSGARSKQRRPQGLPNNTASWFTALTQHGKEDLKFPRGQGVPIINTNSSPDDQIGYYRRATRRIRGGDGK

IGERSGARSKQRRPQGLPNNTASWFTALTQHGKEDLKFPRGQGVPIINTNSSPDDQIGYYRRATRRIRGGDGK  
IGERSGARSKQRRPQGLPNNTASWFTALTQHGKEDLKFPRGQGVPIINTNSSPDDQIGYYRRATRRIRGGDGK

efers to the 20 sequences before the end of the leader, "AUG\_postion" and "first\_orf\_aa" refer

ϻSMWSFNPETNILLNVPLHGTILTRP LLESELVIGAVILRGHLRIAGHHLGRCDIKDLPKEITVATSRTLSYYKLGA!  
ϻSMWSFNPETNILLNVPLHGTILTRP LLESELVIGAVILRGHLRIAGHHLGRCDIKDLPKEITVATSRTLSYYKLGA!  
ϻSMWSFNPETNILLNVPLHGTILTRP LLESELVIGAVILRGHLRIAGHHLGRCDIKDLPKEITVATSRTLSYYKLGA!

ϻSMWSFNPETNILLNVPLHGTILTRP LLESELVIGAVILRGHLRIAGHHLGRCDIKDLPKEITVATSRTLSYYKLGA!  
IPTKKAGGTTEMLAKALRKVPTDNYITTPGQGLNGYTVEEAKTVLKKCKSAFYILPSIISNEKQEILGTVSWNLF

ϻSMWSFNPETNILLNVPLHGTILTRP LLESELVIGAVILRGHLRIAGHHLGRCDIKDLPKEITVATSRTLSYYKLGA!  
IDLVPNQYPNASFDNFKFVCDNIK FADDLNQLTG YKKPASRELKVTFPPDLNGDVVAIDYKHYTPSFKKGAKL

ϻSMWSFNPETNILLNVPLHGTILTRP LLESELVIGAVILRGHLRIAGHHLGRCDIKDLPKEITVATSRTLSYYKLGA!

ϻSMWSFNPETNILLNVPLHGTILTRP LLESELVIGAVILRGHLRIAGHHLGRCDIKDLPKEITVATSRTLSYYKLGA!

ϻSMWSFNPETNILLNVPLHGTILTRP LLESELVIGAVILRGHLRIAGHHLGRCDIKDLPKEITVATSRTLSYYKLGA!  
:MKDLSPRWYFYLLGTGPEAGLPYGANKDGI IWWVATEGALNTPKDHIGTRNPANNA AIVLQLPQGTTLPKGF)

:MKDLSPRWYFYLLGTGPEAGLPYGANKDGI IWWVATEGALNTPKDHIGTRNPANNA AIVLQLPQGTTLPKGF)  
:MKDLSPRWYFYLLGTGPEAGLPYGANKDGI IWWVATEGALNTPKDHIGTRNPANNA AIVLQLPQGTTLPKGF)

to the first AUG position and translated orf of the sgRNA, and "known\_ATG" indicates if the fi



SQRVAGDSGFAAYSRYRIGNYKLNTDHSSSSDNIALLVQ\*  
SQRVAGDSGFAAYSRYRIGNYKLNTDHSSSSDNIALLVQ\*  
SQRVAGDSGFAAYSRYRIGNYKLNTDHSSSSDNIALLVQ\*

SQRVAGDSGFAAYSRYRIGNYKLNTDHSSSSDNIALLVQ\*

REMLAHAEETRKLMPVCVETKAIVSTIQRKYKGIKIQEGVVDYGARFYFYTSKTTVASLINTLNDLNETLVTMPL

SQRVAGDSGFAAYSRYRIGNYKLNTDHSSSSDNIALLVQ\*

.LHKPIVWHVNNATNKATYKPNTWCIRCLWSTKPVETSNSFDVLKSEDAQGMDNLACEDLKPVSEEVVENPT

SQRVAGDSGFAAYSRYRIGNYKLNTDHSSSSDNIALLVQ\*

SQRVAGDSGFAAYSRYRIGNYKLNTDHSSSSDNIALLVQ\*

SQRVAGDSGFAAYSRYRIGNYKLNTDHSSSSDNIALLVQ\*

YAEGRGGSQASSRSSSRN SSRNSTPGSSRGTSPARMAGNGGDAALALLLDRLNQLESKMSGKGQQQQ

YAEGRGGSQASSRSSSRN SSRNSTPGSSRGTSPARMAGNGGDAALALLLDRLNQLESKMSGKGQQQQ  
YAEGRGGSQASSRSSSRN SSRNSTPGSSRGTSPARMAGNGGDAALALLLDRLNQLESKMSGKGQQQQ

irst AUG position is the same as a known sgmRNA.

GYVTHGLNLEEAAARYMRSLKVPATVSVSSPDAVTAYNGYLTSSSKTPEEHFIETISLAGSYKDWSYSGQSTQLG

PIQKDVLECNVKTTEVVGDIIKPANNSLKITEEVGHTDLMAAYVDNSSLTIKPNELSRVLGLKTLATHGLAAVI

.GQTVTKKSAAEASKKPRQKRTATKAYNVTQAFGRRGPEQTQGNFGDQELIRQGTDYKHWPQIAQFAPSAS/

.GQTVTKKSAAEASKKPRQKRTATKAYNVTQAFGRRGPEQTQGNFGDQELIRQGTDYKHWPQIAQFAPSAS/  
.GQTVTKKSAAEASKKPRQKRTATKAYNVTQAFGRRGPEQTQGNFGDQELIRQGTDYKHWPQIAQFAPSAS/



IEFLKRGDKSVYYTSNPTTFHLDGEVITFDNLKTLSSLREVRTIKVFTTVDNINLHTQVVDMSMTYGQQFGPTY

NSVPWDTIANYAKPFLNKVVSTTTNIVTRCLNRVCTNYMPYFFTLQLCTFTRSTNSRIKASMPPTIAKNTVKS

AFFGMSRIGMEVTPSGTWLTYTGAIKLDDKDPNFKDQVILLNKHIDAYKTFPPTPEPKDKKKKKADETQALPQR

AFFGMSRIGMEVTPSGTWLTYTGAIKLDDKDPNFKDQVILLNKHIDAYKTFPPTPEPKDKKKKKADETQALPQR  
AFFGMSRIGMEVTPSGTWLTYTGAIKLDDKDPNFKDQVILLNKHIDAYKTFPPTPEPKDKKKKKADETQALPQR



LDGADVTKIKPHNSHEGKTFYVLPNDDTLRVEAFEYHHTDPSFLGRYMSALNHTKKWKYPQVNGLTSIKWA

SVGKFCLEASFNYLKSPNFSKLINIIWFLLSVCLGSLIYSTAALGVLMNSNLGMPSYCTGYREGYLNSTNVTIATY(

QKKQQTVTLLPAADLDDFSKQLQQSMSSADSTQA\*

QKKQQTVTLLPAADLDDFSKQLQQSMSSADSTQA\*

QKKQQTVTLLPAADLDDFSKQLQQSMSSADSTQA\*





LDNNCYLATALLTQQIELKFNPPALQDAYRARAGEAANFCALILAYCNKTVGELGDVRETMSYLFQHANLDS

CTGSIPCSVCLSGLDSDLTYPSELETIQITISSFKWDLTAFGLVAEWFLAYILFTRFFYVLGLAAIMQLFFSYFAVHFI!



5CKRVLNVVCKTCGQQQTTLKGVEAVMYMGTLSEYEQFKKGVQIPCTCGKQATKYLQQESPVMMSAPPAI

SNSWLMWLIINLVQMAPISAMVRMYIFFASFYYVWKSYPHVVDGCNSSTCMMCYKRNRRATRVECTTIVNG



QYELKHGTFTCASEYTGNYQCGHYKHITSKETLYCIDGALLTKSSEYKGPITDVFYKENSYTTTIKPVTYKLDGVV

VRRSFYVYANGGKGFCKLHNWNCVNCDTFCAGSTFISDEVARDLSLQFKRPINPTDQSSYIVDSVTVKNGSIH



CTEIDPKLDNYYKKDNSYFTEQPIDLVPNQYPNASFDNFKFVCDNIKFADDLNQLTGYKKPASRELKVTFPPD

LYFDKAGQKTYERHSLSHFVNLDNLRANNTKGSLPINVIVFDGKSKCEESSAKSASVYYSQLMCQPILLDQAL'





LNGDVVAIDYKHYTPSFKKGAKLLHKPIVWHVNNATNKATYKPNTWCIRCLWSTKPVETSNSFDVLKSEDAQ

VSDVGDSAEVAVKMFDAYVNTFSSTFNVPMEKCLKLVATAEAEELAKNVSLDNVLSTFISAARQGFVDSVETI



!GMDNLACEDLKPVSEEVVENPTIQKDVLECNVKTTEVVGDIILKPANNSLKITEEVGHTDLMAAYVDNSSLTI!

⟨DVVECLKLSHQSDIEVTGDSCNNYMLTYNKVENMTPRDLGACIDCSARHINAQVAKSHNIALIWNVKDFM⟩



<KPNELSRVLGLKTLATHGLAAVNSVPWDTIANYAKPFLNKVVSTTTNIVTRCLNRVCTNYMPYFFLLLQLCTI

5LSEQLRKQIRSAAKKNLPPFLTCATTRQVVNVVTTKIALKGGKIVNNWLKQLIKVTLVFLFVAAIFYLITPVHV



FTRSTNSRIKASMPPTIAKNTVKSVMKFCLEASFN

MSKHTDFSSEIIGYKAIDGGVTRDIASDTDCFAN

|          | subgenome | leader_end | TRS_start | ACGAAC | ATG_postion | known_ATG |
|----------|-----------|------------|-----------|--------|-------------|-----------|
| S1-Day1  | 1         | 65         | 8436      | no     | 8494        | -         |
|          | 2         | 65         | 10766     | no     | 10770       | -         |
|          | 3         | 68         | 15777     | no     | 15812       | -         |
|          | 4         | 71         | 10772     | no     | 10791       | -         |
| S2-Day2  | 1         | 46         | 26422     | yes    | 26523       | M         |
|          | 2         | 47         | 26421     | yes    | 26523       | M         |
|          | 3         | 75         | 26486     | no     | 26523       | M         |
|          | 4         | 48         | 26443     | yes    | 26523       | M         |
| S3-Day3  | 1         | 62         | 3808      | no     | 3813        | -         |
|          | 2         | 63         | 23922     | no     | 24051       | -         |
|          | 3         | 66         | 14252     | no     | 14258       | -         |
|          | 4         | 67         | 21083     | no     | 21086       | -         |
|          | 5         | 69         | 3816      | no     | 3842        | -         |
|          | 6         | 69         | 7186      | no     | 7210        | -         |
|          | 7         | 69         | 18554     | no     | 18594       | -         |
|          | 8         | 71         | 8201      | no     | 8214        | -         |
|          | 9         | 48         | 26443     | yes    | 26523       | M         |
|          | 10        | 54         | 11370     | no     | 11370       | -         |
| S1-Day4  | 1         | 46         | 26422     | yes    | 26523       | M         |
|          | 2         | 71         | 5594      | no     | 5681        | -         |
|          | 3         | 76         | 28267     | no     | 28274       | N         |
|          | 4         | 48         | 26443     | yes    | 26523       | M         |
|          | 5         | 48         | 28184     | no     | 28207       | -         |
| S2-Day5  | 1         | 48         | 28184     | no     | 28207       | -         |
| S3-Day6  | 1         | 46         | 26422     | yes    | 26523       | M         |
|          | 2         | 71         | 27762     | no     | 27825       | -         |
| S2-Day8  |           |            |           |        |             |           |
| S3-Day9  | 1         | 57         | 12988     | no     | 13032       | -         |
|          | 2         | 58         | 12989     | no     | 13032       | -         |
| S2-Day11 |           |            |           |        |             |           |
| S3-Day12 |           |            |           |        |             |           |
| S3-Day15 |           |            |           |        |             |           |

“peak\_leader” and “peak\_TRS\_start” point to the leader-TRS junctions in sheet "novel", “ACGAA



20\_leader\_seq TRS\_seq first\_orf\_aa  
 ATCTCTTGTA AACTACGAA MCNY\*  
 ATCTCTTGTA AATT MNL\*  
 TCTTGATAGAT AAAGAACTTT MFLCLKQNVGLRLTLKDL MNFALNIQC\*  
 TGATAGATCTG GAACCTCTAA MLTY\*  
 ACAACCAAC TCTCGTGTTA. MADSNGTITVEELKKLLEQWNLVIGFLFTWICLLQFAYANRNRFLYIIKLIFLW  
 CAAACCAACC CTCTCGTGTT, MADSNGTITVEELKKLLEQWNLVIGFLFTWICLLQFAYANRNRFLYIIKLIFLW  
 GATCTGTTCT TATATTAGTT MADSNGTITVEELKKLLEQWNLVIGFLFTWICLLQFAYANRNRFLYIIKLIFLW  
 AAACCAACCA TCTTCTAGAG MADSNGTITVEELKKLLEQWNLVIGFLFTWICLLQFAYANRNRFLYIIKLIFLW  
 TCGATCTCTT TCTCT MTNLFQAFWK\*  
 CGATCTCTTG AAATTTACAA MLASSNNMVIALVILLLETSFVHKSLTALLFCHLCSQMK\*  
 TCTCTTGTAG TAAAAT MTSRKRK\*  
 CTCTTGTAGA AAA MTLKRVFSLTFVGLYNKS\*  
 CTTGTAGATC ACAAACTTGT MKSEKQVEQKIAEIPKEEVKPFITESKPSVEQRKQDDKKIKACVEEVTTTLEETI  
 CTTGTAGATC ACAAAATTACC MGFNCFWLSCRVVFGIYSFH\*  
 CTTGTAGATC ACACACTTAA MGTWL\*  
 TGATAGATCTG GTAGAAACT MLLNVLNCHINLT\*  
 AAACCAACCA TCTTCTAGAG MADSNGTITVEELKKLLEQWNLVIGFLFTWICLLQFAYANRNRFLYIIKLIFLW  
 ACCAACTTTC - MMVLGECGHL\*  
 ACAACCAAC TCTCGTGTTA. MADSNGTITVEELKKLLEQWNLVIGFLFTWICLLQFAYANRNRFLYIIKLIFLW  
 TGATAGATCTG GAACAATTTA MMSAPPAQYELKHGTFTCASEYTGNYQCGHYKHITSKETLYCIDGALLTKSSE  
 ATCTGTTCT AACTAAA MSDNGPQNQRNAPRITFGGSPDSTGSNQNNGERSGARSKQRRPQGLPNNT/  
 AAACCAACCA TCTTCTAGAG MADSNGTITVEELKKLLEQWNLVIGFLFTWICLLQFAYANRNRFLYIIKLIFLW  
 AAACCAACCA TCTTGATAGTG MKTF\*  
 AAACCAACCA TCTTGATAGTG MKTF\*  
 ACAACCAAC TCTCGTGTTA. MADSNGTITVEELKKLLEQWNLVIGFLFTWICLLQFAYANRNRFLYIIKLIFLW  
 TGATAGATCTG GAACCTTCAT MLIIFWFSLELQDHNETCHA\*  
  
 AACTTTCGAT GGTACTTGGT MQQKCLPIQLYYLSVLLL\*  
 ACTTTCGATC GTACTTGGTA MQQKCLPIQLYYLSVLLL\*

“C” indicates if there is a ACGAAC sequences in the “TRS\_seq” (TRS sequences), “20\_leader\_seq”

/LLWPVTLACFVLAAYRINWITGGIAIAMAACLVGLMWLSYFIASFRLFARTRSMWSFNPETNILLNVPLHGTIL`  
/LLWPVTLACFVLAAYRINWITGGIAIAMAACLVGLMWLSYFIASFRLFARTRSMWSFNPETNILLNVPLHGTIL`  
/LLWPVTLACFVLAAYRINWITGGIAIAMAACLVGLMWLSYFIASFRLFARTRSMWSFNPETNILLNVPLHGTIL`  
/LLWPVTLACFVLAAYRINWITGGIAIAMAACLVGLMWLSYFIASFRLFARTRSMWSFNPETNILLNVPLHGTIL`

<FLTENLLLYIDINGNLHPDSATLVSDIDITFLKKDAPYIVGDVVQEGVLTAVVIPTKKAGGTTEMLAKALRKVPTL

/LLWPVTLACFVLAAYRINWITGGIAIAMAACLVGLMWLSYFIASFRLFARTRSMWSFNPETNILLNVPLHGTIL`

/LLWPVTLACFVLAAYRINWITGGIAIAMAACLVGLMWLSYFIASFRLFARTRSMWSFNPETNILLNVPLHGTIL`  
:YKGPITDVFYKENSYTTTTIKPVTYKLDGVVCTEIDPKLDNYYKKDNSYFTEQPIDLVPNQYPNASFDNFKFVCDI  
ASWFTALTQHGKEDLKFRGQGVPIINTNSSPDDQIGYYRRATRRIRGGDGKMKDLSRWYFYLLGTGPEAGLI  
/LLWPVTLACFVLAAYRINWITGGIAIAMAACLVGLMWLSYFIASFRLFARTRSMWSFNPETNILLNVPLHGTIL`

/LLWPVTLACFVLAAYRINWITGGIAIAMAACLVGLMWLSYFIASFRLFARTRSMWSFNPETNILLNVPLHGTIL`

refers to the 20 sequences before the end of the leader, "AUG\_postion" and "first\_orf\_aa" refer

TRP LLESELVIGAVILRGHLRIAGHHLGRCDIKDLPKEITVATSRTL SYYKLGASQRVAGDSGFAAYSRYRIGNYKLI  
TRP LLESELVIGAVILRGHLRIAGHHLGRCDIKDLPKEITVATSRTL SYYKLGASQRVAGDSGFAAYSRYRIGNYKLI  
TRP LLESELVIGAVILRGHLRIAGHHLGRCDIKDLPKEITVATSRTL SYYKLGASQRVAGDSGFAAYSRYRIGNYKLI  
TRP LLESELVIGAVILRGHLRIAGHHLGRCDIKDLPKEITVATSRTL SYYKLGASQRVAGDSGFAAYSRYRIGNYKLI

NYITTPGQGLNGYTV EEAKTVLKKCKSAFYILPSIISNEKQEILGTVSWNLREMLAHA EETRKLMPVCVETKAI

TRP LLESELVIGAVILRGHLRIAGHHLGRCDIKDLPKEITVATSRTL SYYKLGASQRVAGDSGFAAYSRYRIGNYKLI

TRP LLESELVIGAVILRGHLRIAGHHLGRCDIKDLPKEITVATSRTL SYYKLGASQRVAGDSGFAAYSRYRIGNYKLI  
NIK FADDLNQLTG YKKPASRELKVTF PDLNGDVVAIDYKHYTP SFKKGAKLLHKPIVWHVNNATNKATYKPNT  
PYGANKDGI IWWATEGALNTPKDHIGTRNPANNA AIVLQLPQGTTLPKGFYAEGSRGGSQASSR SSSRSRNSSF  
TRP LLESELVIGAVILRGHLRIAGHHLGRCDIKDLPKEITVATSRTL SYYKLGASQRVAGDSGFAAYSRYRIGNYKLI

TRP LLESELVIGAVILRGHLRIAGHHLGRCDIKDLPKEITVATSRTL SYYKLGASQRVAGDSGFAAYSRYRIGNYKLI

· to the first AUG position and translated orf of the sgmRNA, and “known\_ATG” indicates if the fii

NTDHSSSSDNIALLVQ\*  
NTDHSSSSDNIALLVQ\*  
NTDHSSSSDNIALLVQ\*  
NTDHSSSSDNIALLVQ\*

VSTIQRKYKGIKIQEGVVDYGARFYFYTSKTTVASLINTLNDLNETLVTMPLGYVTHGLNLEEAAARYMRSCLKVPAI

NTDHSSSSDNIALLVQ\*

NTDHSSSSDNIALLVQ\*  
WCIRCLWSTKPVETSNSFDVLKSEDAQGMDNLACEDLKPVSEEVVENPTIQKDVLECNVKTTEVVGDIIKPAI  
{NSTPGSSRGTSPARMAGNGGDAALALLLDRLNQLESKMSGKGGQQGQTVTKKSAAEASKKPRQKRTATI  
NTDHSSSSDNIALLVQ\*

NTDHSSSSDNIALLVQ\*

rst AUG position is the same as a known sgmRNA.

TVSVSSPDAVTAYNGYLTSSSKTPEEHFIETISLAGSYKDWSYSGQSTQLGIEFLKRGDKSVYYTSNPTTFHLDGE\

\NSLKITEEVGHTDLMAAYVDNSSLTIKKPNELSRVLGLKTLATHGLAAVNSVPWDTIANYAKPFLNKVVSTTTM  
<AYNVTQAFGRRGPEQTQGNFGDQELIRQGTDYKHWPQIAQFAPSASAFFGMSRIGMEVTPSGTWLTYTGA

/ITFDNLKTLLSLREVRTIKVFTTVDNINLHTQVVDMSMTYGQQFGPTYLDGADVTKIKPHNSHEGKTFYVLPNI

IVTRCLNRVCTNYMPYFFLLLQLCTFTRSTNSRIKASMPPTIAKNTVKSVMKFCLEASFNYLKSPNFSKLINIIWI  
IKLDDKDPNFKDQVILLNKHIDAYKTFPPTEPKKDKKKKADETQALPQRQKKQQTVLLPAADLDDFSKQLQQS

DDTLRVEAFEYYHTTDPDFLGRYMSALNHTKKWKYPQVNGLTSLIKWADNNCYLATALLTLQQLKFNPPALQI

FLLSVCLGSLIYSTAALGVLMNSNLGMPSYCTGYREGYLNSTNVTIATYCTGSIPCSVCLSGLDSDTYPSELETIQIT  
SMSSADSTQA\*

DAYRARAGEAANFCALILAYCNKTVGELGDVRETMSYLFQHANLDSCKRVLNVVCKTCGQQQTTLKGVEAVI

ISSFKWDLTAFGLVAEWFLAYILFTRFFYVLGLAAIMQLFFSYFAVHFISNSWLMWLIINLVQMAPISAMVRMY



VIYMGTLSEYEQFKKGVQIPCTCGKQATKYLQQESPFVMMMSAPPAQYELKHGTFTCASEYTGNYQCGHYKHIT

IFFASFYYVWKSIVHVVDGCNSSTCMMCYKRNRATRVECTTIVNGVRRSFYVYANGGKGFCKLHNWNCVNC

SKETLYCIDGALLTKSSEYKGPITDVFYKENSYTTTIKPVTYKLDGVVCTEIDPKLDNYYKKDNSYFTEQPIDLVPNC

DTFCAGSTFISDEVARDLSLQFKRPINPTDQSSYIVDSVTVKNGSIHLYFDKAGQKTYERHSLSHFVNLDNLRANI

QPYPNASFDNFKFVCDNIKFADDLNQLTGYKKPASRELKVTFFPDLNGDVVAIDYKHYPSPFKKGAKLLHKPIVM

NTKGLPINVIVFDGKSKCEESSAKSASVYYSQLMCQPILLDQALVSDVGDSAEVAVKMFDAYVNTFSSTFNVI

VHVNNATNKATYKPNTWCIRCLWSTKPVETSNSFDVLKSEDAQGMDNLACEDLKPVSEEVVENPTIQKDVLEC

³MEKLTLVATAEAELAKNVSLDNVLSTFISAARQGFVDSVETKDVVECLKLSHQSDIEVTGDSCNNYMLTYN

ENVKTTEVVGDIILKPANNSLKITEEVGHTDLMAAYVDNSSLTIKKPNELSRVLGLKTLATHGLAAVNSVPWDTI/

KVENMTPRDLGACIDCSARHINAQVAKSHNIALIWNVKDFMSLSEQLRKQIRSAKKNNLPFKLTCATTRQVV

ANYAKPFLNKVVSTTTNIVTRCLNRVCTNYMPYFFLLLQLCTFTRSTNSRIKASMPPTIAKNTVKSVMKFCLEAS

NVVTTKIALKGGKIVNNWLKQLIKVTLVFLFVAAIFYLITPVHVMSKHTDFSSEIIGYKAIDGGVTRDIASTDTCFA

FN

IN

|         | subgenome | ref_leader_end | peak_leader_end | ref_TRS_start |
|---------|-----------|----------------|-----------------|---------------|
| S1-Day1 | S         | 65             | 65              | 21552         |
|         | ORF3a     | 69             | 69              | 25385         |
|         | E         | 69             | 69              | 26237         |
|         | M         | 65             | 65              | 26469         |
|         | ORF6      | 69             | 69              | 27041         |
|         | ORF7a     | 69             | 69              | 27388         |
|         | ORF7b     | 65             | 0               | 27644         |
|         | ORF8      | 65             | 65              | 27884         |
|         | N         | 65             | 64              | 28256         |
|         | ORF10     | 65             | 0               | 29530         |
| S2-Day2 | S         | 65             | 65              | 21552         |
|         | ORF3a     | 69             | 69              | 25385         |
|         | E         | 69             | 69              | 26237         |
|         | M         | 65             | 65              | 26469         |
|         | ORF6      | 69             | 69              | 27041         |
|         | ORF7a     | 69             | 69              | 27388         |
|         | ORF7b     | 65             | 0               | 27644         |
|         | ORF8      | 65             | 65              | 27884         |
|         | N         | 65             | 64              | 28256         |
|         | ORF10     | 65             | 0               | 29530         |
| S3-Day3 | S         | 65             | 65              | 21552         |
|         | ORF3a     | 69             | 69              | 25385         |
|         | E         | 69             | 69              | 26237         |
|         | M         | 65             | 65              | 26469         |
|         | ORF6      | 69             | 69              | 27041         |
|         | ORF7a     | 69             | 69              | 27388         |
|         | ORF7b     | 65             | 0               | 27644         |
|         | ORF8      | 65             | 0               | 27884         |
|         | N         | 65             | 64              | 28256         |
|         | ORF10     | 65             | 0               | 29530         |
| S1-Day4 | S         | 65             | 65              | 21552         |
|         | ORF3a     | 69             | 69              | 25385         |
|         | E         | 69             | 0               | 26237         |
|         | M         | 65             | 64              | 26469         |
|         | ORF6      | 69             | 69              | 27041         |
|         | ORF7a     | 69             | 69              | 27388         |
|         | ORF7b     | 65             | 0               | 27644         |
|         | ORF8      | 65             | 65              | 27884         |
|         | N         | 65             | 64              | 28256         |
|         | ORF10     | 65             | 0               | 29530         |
|         | S         | 65             | 65              | 21552         |
|         | ORF3a     | 69             | 69              | 25385         |



|          |       |    |    |       |
|----------|-------|----|----|-------|
| S2-Day5  | E     | 69 | 69 | 26237 |
|          | M     | 65 | 64 | 26469 |
|          | ORF6  | 69 | 0  | 27041 |
|          | ORF7a | 69 | 69 | 27388 |
|          | ORF7b | 65 | 65 | 27644 |
|          | ORF8  | 65 | 65 | 27884 |
|          | N     | 65 | 64 | 28256 |
|          | ORF10 | 65 | 0  | 29530 |
|          | S     | 65 | 0  | 21552 |
|          | ORF3a | 69 | 0  | 25385 |
| S3-Day6  | E     | 69 | 69 | 26237 |
|          | M     | 65 | 0  | 26469 |
|          | ORF6  | 69 | 69 | 27041 |
|          | ORF7a | 69 | 69 | 27388 |
|          | ORF7b | 65 | 0  | 27644 |
|          | ORF8  | 65 | 0  | 27884 |
|          | N     | 65 | 65 | 28256 |
|          | ORF10 | 65 | 0  | 29530 |
|          | S     | 65 | 0  | 21552 |
|          | ORF3a | 69 | 0  | 25385 |
| S2-Day8  | E     | 69 | 0  | 26237 |
|          | M     | 65 | 0  | 26469 |
|          | ORF6  | 69 | 69 | 27041 |
|          | ORF7a | 69 | 0  | 27388 |
|          | ORF7b | 65 | 0  | 27644 |
|          | ORF8  | 65 | 65 | 27884 |
|          | N     | 65 | 65 | 28256 |
|          | ORF10 | 65 | 65 | 29530 |
|          | S     | 65 | 0  | 21552 |
|          | ORF3a | 69 | 0  | 25385 |
| S3-Day9  | E     | 69 | 0  | 26237 |
|          | M     | 65 | 65 | 26469 |
|          | ORF6  | 69 | 0  | 27041 |
|          | ORF7a | 69 | 0  | 27388 |
|          | ORF7b | 65 | 0  | 27644 |
|          | ORF8  | 65 | 0  | 27884 |
|          | N     | 65 | 65 | 28256 |
|          | ORF10 | 65 | 0  | 29530 |
|          | S     | 65 | 0  | 21552 |
|          | ORF3a | 69 | 69 | 25385 |
| S2-Day11 | E     | 69 | 69 | 26237 |
|          | M     | 65 | 65 | 26469 |
|          | ORF6  | 69 | 69 | 27041 |

|          |       |    |    |       |
|----------|-------|----|----|-------|
| S3-Day11 | ORF7a | 69 | 0  | 27388 |
|          | ORF7b | 65 | 0  | 27644 |
|          | ORF8  | 65 | 0  | 27884 |
|          | N     | 65 | 65 | 28256 |
|          | ORF10 | 65 | 0  | 29530 |
|          | S     | 65 | 65 | 21552 |
|          | ORF3a | 69 | 69 | 25385 |
|          | E     | 69 | 0  | 26237 |
|          | M     | 65 | 0  | 26469 |
|          | ORF6  | 69 | 69 | 27041 |
| S3-Day12 | ORF7a | 69 | 0  | 27388 |
|          | ORF7b | 65 | 0  | 27644 |
|          | ORF8  | 65 | 0  | 27884 |
|          | N     | 65 | 64 | 28256 |
|          | ORF10 | 65 | 0  | 29530 |
|          | S     | 65 | 0  | 21552 |
|          | ORF3a | 69 | 0  | 25385 |
|          | E     | 69 | 0  | 26237 |
|          | M     | 65 | 65 | 26469 |
|          | ORF6  | 69 | 0  | 27041 |
| S3-Day14 | ORF7a | 69 | 0  | 27388 |
|          | ORF7b | 65 | 0  | 27644 |
|          | ORF8  | 65 | 0  | 27884 |
|          | N     | 65 | 65 | 28256 |
|          | ORF10 | 65 | 0  | 29530 |

The numbers in the bracket are (reads with left primers, reads with right primers, reads with both primers).  
Normalized count=(Read count/Total number of read mapped on reference genome)\*1000000.  
Total number of read mapped on reference genome is 36593897, 37733596, 33222295, 3394950:  
“ref\_leader\_end” and “peak\_leader\_end” point to the reference position of the end of leader and peak respectively.

| peak_TRS_start | peak_count             | peak_normalized_count    | cluster_count        |
|----------------|------------------------|--------------------------|----------------------|
| 21552          | 1697(1696,1320,1319,1) | 46.37(46.35,36.07,36.0)  | 1706(1705,1327,1326) |
| 25385          | 1339(1279,0,0,18)      | 36.59(34.95,0.00,0.00,1) | 1343(1283,0,0,18)    |
| 26237          | 512(506,0,0,6)         | 13.99(13.83,0.00,0.00,1) | 515(508,0,0,6)       |
| 26469          | 3076(3073,2952,2949,2) | 84.06(83.98,80.67,80.5)  | 3181(3178,3041,3038) |
| 27041          | 3670(3662,3298,3291,3) | 100.29(100.07,90.12,8)   | 3704(3696,3332,3325) |
| 27388          | 42(42,2,2,8)           | 1.15(1.15,0.05,0.05,0.2) | 42(42,2,2,8)         |
| 0              | 0                      | 0                        | 0                    |
| 27884          | 405(405,0,0,4)         | 11.07(11.07,0.00,0.00,1) | 406(406,0,0,4)       |
| 28255          | 4861(4853,4796,4788,4) | 132.84(132.62,131.06,)   | 6447(6435,6362,6350) |
| 0              | 0                      | 0                        | 0                    |
| 21552          | 4522(4515,3287,3282,3) | 119.84(119.65,87.11,8)   | 4552(4545,3297,3292) |
| 25385          | 2661(2598,0,0,24)      | 70.52(68.85,0.00,0.00,1) | 2745(2681,0,0,24)    |
| 26237          | 1630(1612,3,3,18)      | 43.20(42.72,0.08,0.08,1) | 1632(1614,3,3,18)    |
| 26469          | 679(679,637,637,648)   | 17.99(17.99,16.88,16.8)  | 931(929,873,872,864) |
| 27041          | 6163(6144,5492,5473,5) | 163.33(162.83,145.55,)   | 6229(6209,5550,5531) |
| 27388          | 56(53,4,1,0)           | 1.48(1.40,0.11,0.03,0.0) | 56(53,4,1,0)         |
| 0              | 0                      | 0                        | 0                    |
| 27884          | 200(200,0,0,0)         | 5.30(5.30,0.00,0.00,0.0) | 200(200,0,0,0)       |
| 28255          | 36388(36328,35987,359) | 964.34(962.75,953.71,)   | 37914(37830,37462,3) |
| 0              | 0                      | 0                        | 0                    |
| 21552          | 3906(3899,3358,3351,3) | 117.57(117.36,101.08,)   | 3930(3923,3377,3370) |
| 25385          | 212(212,0,0,4)         | 6.38(6.38,0.00,0.00,0.1) | 212(212,0,0,4)       |
| 26237          | 5208(5203,2,2,36)      | 156.76(156.61,0.06,0.0)  | 5208(5203,2,2,36)    |
| 26469          | 7037(7027,6807,6798,6) | 211.82(211.51,204.89,)   | 7085(7074,6852,6842) |
| 27041          | 11089(11078,10731,107) | 333.78(333.45,323.01,)   | 11119(11108,10761,1) |
| 27388          | 2(2,0,0,0)             | 0.06(0.06,0.00,0.00,0.0) | 2(2,0,0,0)           |
| 0              | 0                      | 0                        | 0                    |
| 0              | 0                      | 0                        | 0                    |
| 28255          | 27632(27607,27286,272) | 831.73(830.98,821.32,)   | 28304(28266,27942,2) |
| 0              | 0                      | 0                        | 0                    |
| 21552          | 0(0,0,0,0)             | 0.00(0.00,0.00,0.00,0.0) | 0(0,0,0,0)           |
| 25385          | 298(296,0,0,6)         | 8.78(8.72,0.00,0.00,0.1) | 298(296,0,0,6)       |
| 0              | 0                      | 0                        | 0                    |
| 26468          | 3815(3815,3714,3714,3) | 112.37(112.37,109.40,)   | 6375(6371,6193,6189) |
| 27041          | 11235(11220,10744,107) | 330.93(330.49,316.47,)   | 11285(11270,10792,1) |
| 27388          | 8(8,0,0,0)             | 0.24(0.24,0.00,0.00,0.0) | 8(8,0,0,0)           |
| 0              | 0                      | 0                        | 0                    |
| 27884          | 116(116,0,0,4)         | 3.42(3.42,0.00,0.00,0.1) | 116(116,0,0,4)       |
| 28255          | 32243(32207,31567,315) | 949.73(948.67,929.82,)   | 37100(37053,36346,3) |
| 0              | 0                      | 0                        | 0                    |
| 21552          | 2(2,2,2,2)             | 0.07(0.07,0.07,0.07,0.0) | 2(2,2,2,2)           |
| 25385          | 1086(1077,0,0,20)      | 38.48(38.16,0.00,0.00,1) | 1089(1080,0,0,20)    |

|       |                       |                             |                     |
|-------|-----------------------|-----------------------------|---------------------|
| 26237 | 862(860,0,0,2)        | 30.55(30.47,0.00,0.00,0.00) | 862(860,0,0,2)      |
| 26468 | 5952(5952,5840,5840,5 | 210.91(210.91,206.95,:      | 8897(8897,8702,8702 |
|       | 0                     | 0                           | 0                   |
| 27388 | 5(4,1,0,2)            | 0.18(0.14,0.04,0.00,0.00)   | 5(4,1,0,2)          |
| 27644 | 1(1,0,0,0)            | 0.04(0.04,0.00,0.00,0.00)   | 1(1,0,0,0)          |
| 27884 | 1(1,0,0,0)            | 0.04(0.04,0.00,0.00,0.00)   | 1(1,0,0,0)          |
| 28255 | 51775(51734,51281,512 | 1834.69(1833.24,1817.55     | 251(55188,54723,5   |
|       | 0                     | 0                           | 0                   |
|       | 0                     | 0                           | 0                   |
|       | 0                     | 0                           | 0                   |
| 26237 | 1(0,0,0,0)            | 0.03(0.00,0.00,0.00,0.00)   | 1(0,0,0,0)          |
|       | 0                     | 0                           | 0                   |
| 27041 | 2(2,2,2,2)            | 0.07(0.07,0.07,0.07,0.00)   | 2(2,2,2,2)          |
| 27388 | 4(4,0,0,2)            | 0.14(0.14,0.00,0.00,0.00)   | 4(4,0,0,2)          |
|       | 0                     | 0                           | 0                   |
|       | 0                     | 0                           | 0                   |
| 28256 | 9(4,9,4,4)            | 0.31(0.14,0.31,0.14,0.19)   | 9(4,9,4,4)          |
|       | 0                     | 0                           | 0                   |
|       | 0                     | 0                           | 0                   |
|       | 0                     | 0                           | 0                   |
|       | 0                     | 0                           | 0                   |
|       | 0                     | 0                           | 0                   |
| 27041 | 2(2,2,2,2)            | 0.12(0.12,0.12,0.12,0.12)   | 2(2,2,2,2)          |
|       | 0                     | 0                           | 0                   |
|       | 0                     | 0                           | 0                   |
| 27884 | 117(111,0,0,0)        | 7.29(6.92,0.00,0.00,0.00)   | 117(111,0,0,0)      |
| 28256 | 2(0,2,0,0)            | 0.12(0.00,0.12,0.00,0.00)   | 2(0,2,0,0)          |
| 29530 | 1(0,0,0,0)            | 0.06(0.00,0.00,0.00,0.00)   | 1(0,0,0,0)          |
|       | 0                     | 0                           | 0                   |
|       | 0                     | 0                           | 0                   |
|       | 0                     | 0                           | 0                   |
| 26469 | 1789(1787,1780,1778,1 | 138.15(137.99,137.45,:      | 1798(1796,1789,1787 |
|       | 0                     | 0                           | 0                   |
|       | 0                     | 0                           | 0                   |
|       | 0                     | 0                           | 0                   |
|       | 0                     | 0                           | 0                   |
| 28256 | 6(2,6,2,2)            | 0.46(0.15,0.46,0.15,0.16)   | 6(2,6,2,2)          |
|       | 0                     | 0                           | 0                   |
|       | 0                     | 0                           | 0                   |
| 25385 | 2(0,0,0,0)            | 0.12(0.00,0.00,0.00,0.00)   | 2(0,0,0,0)          |
| 26237 | 1(1,0,0,0)            | 0.06(0.06,0.00,0.00,0.00)   | 1(1,0,0,0)          |
| 26469 | 4(4,4,4,4)            | 0.23(0.23,0.23,0.23,0.24)   | 4(4,4,4,4)          |
| 27041 | 2(2,2,2,0)            | 0.12(0.12,0.12,0.12,0.00)   | 2(2,2,2,0)          |

|       |                                     |                                      |                         |
|-------|-------------------------------------|--------------------------------------|-------------------------|
| 0     | 0                                   | 0                                    | 0                       |
| 0     | 0                                   | 0                                    | 0                       |
| 0     | 0                                   | 0                                    | 0                       |
| 28256 | 16(16,16,16,16)                     | 0.92(0.92,0.92,0.92,0.92)            | 16(16,16,16,16)         |
| 0     | 0                                   | 0                                    | 0                       |
| 21552 | 21437(21418,21323,21512,21544)      | 1258.82(1257.70,1252.21,1258.82)     | 21420,21420,21420,21420 |
| 25385 | 1(0,0,0,0)                          | 0.06(0.00,0.00,0.00,0.00)            | 1(0,0,0,0)              |
| 0     | 0                                   | 0                                    | 0                       |
| 0     | 0                                   | 0                                    | 0                       |
| 27041 | 78468(78373,77971,77846,78719)      | 4607.78(4602.20,4578.78,4607.78)     | 78221,78221,78221,78221 |
| 0     | 0                                   | 0                                    | 0                       |
| 0     | 0                                   | 0                                    | 0                       |
| 0     | 0                                   | 0                                    | 0                       |
| 28255 | 299498(299228,298519,298519,305621) | 17587.04(17571.19,17587.04,17587.04) | 30456,30456,30456,30456 |
| 0     | 0                                   | 0                                    | 0                       |
| 0     | 0                                   | 0                                    | 0                       |
| 0     | 0                                   | 0                                    | 0                       |
| 0     | 0                                   | 0                                    | 0                       |
| 26469 | 4(4,4,4,2)                          | 0.39(0.39,0.39,0.39,0.24)            | 4(4,4,4,2)              |
| 0     | 0                                   | 0                                    | 0                       |
| 0     | 0                                   | 0                                    | 0                       |
| 0     | 0                                   | 0                                    | 0                       |
| 0     | 0                                   | 0                                    | 0                       |
| 28256 | 2(2,2,2,2)                          | 0.20(0.20,0.20,0.20,0.22)            | 2(2,2,2,2)              |
| 0     | 0                                   | 0                                    | 0                       |

primers, same junction on paired reads with at least a primer).

3, 28220017, 28624584, 16048939, 12949851, 17312079, 17029467, 20512435 and 101435. The position of the end of leader identified in the most common reads (peak count) on the

cluster\_normalized\_count  
46.62(46.59,36.26,36.24,37.82)  
36.70(35.06,0.00,0.00,0.49)  
14.07(13.88,0.00,0.00,0.16)  
86.93(86.85,83.10,83.02,83.68)  
101.22(101.00,91.05,90.86,94.22)  
1.15(1.15,0.05,0.05,0.22)  
0  
11.09(11.09,0.00,0.00,0.11)  
176.18(175.85,173.85,173.53,140.24)  
0  
120.64(120.45,87.38,87.24,94.82)  
72.75(71.05,0.00,0.00,0.64)  
43.25(42.77,0.08,0.08,0.48)  
24.67(24.62,23.14,23.11,22.90)  
165.08(164.55,147.08,146.58,150.26)  
1.48(1.40,0.11,0.03,0.00)  
0  
5.30(5.30,0.00,0.00,0.00)  
1004.78(1002.55,992.80,990.74,986.81)  
0  
118.29(118.08,101.65,101.44,104.33)  
6.38(6.38,0.00,0.00,0.12)  
156.76(156.61,0.06,0.06,1.08)  
213.26(212.93,206.25,205.95,207.99)  
334.68(334.35,323.91,323.58,322.43)  
0.06(0.06,0.00,0.00,0.00)  
0  
0  
851.96(850.81,841.06,839.95,840.52)  
0  
0.00(0.00,0.00,0.00,0.00)  
8.78(8.72,0.00,0.00,0.18)  
0  
187.78(187.66,182.42,182.30,185.75)  
332.41(331.96,317.88,317.44,321.18)  
0.24(0.24,0.00,0.00,0.00)  
0  
3.42(3.42,0.00,0.00,0.12)  
1092.80(1091.42,1070.59,1069.21,1022.17)  
0  
0.07(0.07,0.07,0.07,0.07)  
38.59(38.27,0.00,0.00,0.71)

30.55(30.47,0.00,0.00,0.07)  
315.27(315.27,308.36,308.36,312.26)  
0  
0.18(0.14,0.04,0.00,0.07)  
0.04(0.04,0.00,0.00,0.00)  
0.04(0.04,0.00,0.00,0.00)  
1957.87(1955.63,1939.16,1937.03,1932.60)  
0  
0  
0  
0.03(0.00,0.00,0.00,0.00)  
0  
0.07(0.07,0.07,0.07,0.07)  
0.14(0.14,0.00,0.00,0.07)  
0  
0  
0.31(0.14,0.31,0.14,0.14)  
0  
0  
0  
0  
0  
0.12(0.12,0.12,0.12,0.12)  
0  
0  
7.29(6.92,0.00,0.00,0.00)  
0.12(0.00,0.12,0.00,0.00)  
0.06(0.00,0.00,0.00,0.00)  
0  
0  
0  
138.84(138.69,138.15,137.99,136.06)  
0  
0  
0  
0  
0.46(0.15,0.46,0.15,0.15)  
0  
0  
0.12(0.00,0.00,0.00,0.00)  
0.06(0.06,0.00,0.00,0.00)  
0.23(0.23,0.23,0.23,0.23)  
0.12(0.12,0.12,0.12,0.00)

0  
0  
0  
0.92(0.92,0.92,0.92,0.92)  
0  
1265.10(1263.93,1257.82,1256.65,1219.18)  
0.06(0.00,0.00,0.00,0.00)  
0  
0  
4622.52(4616.88,4593.27,4587.69,4547.18)  
0  
0  
0  
17946.60(17927.10,17884.71,17865.97,17724.57)  
0  
0  
0  
0  
0.39(0.39,0.39,0.39,0.20)  
0  
0  
0  
0  
0.20(0.20,0.20,0.20,0.20)  
0

3083, excluding the mapped reads unpaired, not primary alignment and supplementary alignment to the reference genome, and "ref\_TRS\_start" and "peak\_TRS\_start" refer to the reference position.







nent.

on of the start of TRS and the position of the start of TRS identified in the most common reads (





peak count) on the reference genome.

|         | subgenome | ref_leader_end | peak_leader_ref_TRS_start | peak_TRS_start |
|---------|-----------|----------------|---------------------------|----------------|
| S1-Day1 | S         | 65             | 0                         | 21552          |
|         | ORF3a     | 69             | 69                        | 25385          |
|         | E         | 69             | 0                         | 26237          |
|         | M         | 65             | 65                        | 26469          |
|         | ORF6      | 69             | 0                         | 27041          |
|         | ORF7a     | 69             | 0                         | 27388          |
|         | ORF7b     | 65             | 0                         | 27644          |
|         | ORF8      | 65             | 65                        | 27884          |
|         | N         | 65             | 65                        | 28256          |
|         | ORF10     | 65             | 0                         | 29530          |
| S2-Day2 | S         | 65             | 65                        | 21552          |
|         | ORF3a     | 69             | 69                        | 25385          |
|         | E         | 69             | 69                        | 26237          |
|         | M         | 65             | 65                        | 26469          |
|         | ORF6      | 69             | 69                        | 27041          |
|         | ORF7a     | 69             | 69                        | 27388          |
|         | ORF7b     | 65             | 65                        | 27644          |
|         | ORF8      | 65             | 65                        | 27884          |
|         | N         | 65             | 64                        | 28256          |
|         | ORF10     | 65             | 0                         | 29530          |
| S3-Day3 | S         | 65             | 0                         | 21552          |
|         | ORF3a     | 69             | 69                        | 25385          |
|         | E         | 69             | 0                         | 26237          |
|         | M         | 65             | 65                        | 26469          |
|         | ORF6      | 69             | 0                         | 27041          |
|         | ORF7a     | 69             | 69                        | 27388          |
|         | ORF7b     | 65             | 0                         | 27644          |
|         | ORF8      | 65             | 65                        | 27884          |
|         | N         | 65             | 64                        | 28256          |
|         | ORF10     | 65             | 0                         | 29530          |
| S1-Day4 | S         | 65             | 0                         | 21552          |
|         | ORF3a     | 69             | 69                        | 25385          |
|         | E         | 69             | 69                        | 26237          |
|         | M         | 65             | 65                        | 26469          |
|         | ORF6      | 69             | 0                         | 27041          |
|         | ORF7a     | 69             | 69                        | 27388          |
|         | ORF7b     | 65             | 0                         | 27644          |
|         | ORF8      | 65             | 0                         | 27884          |
|         | N         | 65             | 64                        | 28256          |
|         | ORF10     | 65             | 0                         | 29530          |
| S       | 65        | 65             | 21552                     |                |
| ORF3a   | 69        | 69             | 25385                     |                |

|          |       |    |    |       |       |
|----------|-------|----|----|-------|-------|
| S2-Day5  | E     | 69 | 69 | 26237 | 26237 |
|          | M     | 65 | 64 | 26469 | 26468 |
|          | ORF6  | 69 | 69 | 27041 | 27041 |
|          | ORF7a | 69 | 69 | 27388 | 27388 |
|          | ORF7b | 65 | 65 | 27644 | 27644 |
|          | ORF8  | 65 | 65 | 27884 | 27884 |
|          | N     | 65 | 64 | 28256 | 28255 |
|          | ORF10 | 65 | 0  | 29530 | 0     |
|          | S     | 65 | 0  | 21552 | 0     |
|          | ORF3a | 69 | 69 | 25385 | 25385 |
| S3-Day6  | E     | 69 | 69 | 26237 | 26237 |
|          | M     | 65 | 65 | 26469 | 26469 |
|          | ORF6  | 69 | 69 | 27041 | 27041 |
|          | ORF7a | 69 | 69 | 27388 | 27388 |
|          | ORF7b | 65 | 0  | 27644 | 0     |
|          | ORF8  | 65 | 0  | 27884 | 0     |
|          | N     | 65 | 64 | 28256 | 28255 |
|          | ORF10 | 65 | 0  | 29530 | 0     |
|          | S     | 65 | 65 | 21552 | 21552 |
|          | ORF3a | 69 | 69 | 25385 | 25385 |
| S2-Day8  | E     | 69 | 69 | 26237 | 26237 |
|          | M     | 65 | 64 | 26469 | 26468 |
|          | ORF6  | 69 | 69 | 27041 | 27041 |
|          | ORF7a | 69 | 69 | 27388 | 27388 |
|          | ORF7b | 65 | 0  | 27644 | 0     |
|          | ORF8  | 65 | 65 | 27884 | 27884 |
|          | N     | 65 | 64 | 28256 | 28255 |
|          | ORF10 | 65 | 0  | 29530 | 0     |
|          | S     | 65 | 0  | 21552 | 0     |
|          | ORF3a | 69 | 69 | 25385 | 25385 |
| S3-Day9  | E     | 69 | 0  | 26237 | 0     |
|          | M     | 65 | 0  | 26469 | 0     |
|          | ORF6  | 69 | 0  | 27041 | 0     |
|          | ORF7a | 69 | 0  | 27388 | 0     |
|          | ORF7b | 65 | 0  | 27644 | 0     |
|          | ORF8  | 65 | 0  | 27884 | 0     |
|          | N     | 65 | 65 | 28256 | 28256 |
|          | ORF10 | 65 | 0  | 29530 | 0     |
|          | S     | 65 | 0  | 21552 | 0     |
|          | ORF3a | 69 | 0  | 25385 | 0     |
| S2-Day11 | E     | 69 | 0  | 26237 | 0     |
|          | M     | 65 | 0  | 26469 | 0     |
|          | ORF6  | 69 | 0  | 27041 | 0     |



|          |       |    |    |       |       |
|----------|-------|----|----|-------|-------|
| S3-Day11 | ORF7a | 69 | 0  | 27388 | 0     |
|          | ORF7b | 65 | 0  | 27644 | 0     |
|          | ORF8  | 65 | 0  | 27884 | 0     |
|          | N     | 65 | 65 | 28256 | 28256 |
|          | ORF10 | 65 | 0  | 29530 | 0     |
|          | S     | 65 | 0  | 21552 | 0     |
|          | ORF3a | 69 | 0  | 25385 | 0     |
|          | E     | 69 | 0  | 26237 | 0     |
|          | M     | 65 | 0  | 26469 | 0     |
|          | ORF6  | 69 | 0  | 27041 | 0     |
| S3-Day12 | ORF7a | 69 | 0  | 27388 | 0     |
|          | ORF7b | 65 | 0  | 27644 | 0     |
|          | ORF8  | 65 | 0  | 27884 | 0     |
|          | N     | 65 | 65 | 28256 | 28256 |
|          | ORF10 | 65 | 0  | 29530 | 0     |
|          | S     | 65 | 0  | 21552 | 0     |
|          | ORF3a | 69 | 0  | 25385 | 0     |
|          | E     | 69 | 0  | 26237 | 0     |
|          | M     | 65 | 0  | 26469 | 0     |
|          | ORF6  | 69 | 69 | 27041 | 27041 |
| S3-Day18 | ORF7a | 69 | 0  | 27388 | 0     |
|          | ORF7b | 65 | 0  | 27644 | 0     |
|          | ORF8  | 65 | 0  | 27884 | 0     |
|          | N     | 65 | 65 | 28256 | 28256 |
|          | ORF10 | 65 | 0  | 29530 | 0     |
|          |       |    |    |       |       |

The numbers in the bracket are (reads with left primers, reads with right primers, reads with both primers, reads with no primers)  
Normalized count=(Read count/Total number of read mapped on reference genome)\*100  
Total number of read mapped on reference genome is 17428684, 35949645, 26863662, 28256  
“ref\_leader\_end” and “peak\_leader\_end” point to the reference position of the end of leader

| peak_count    | peak_normal   | cluster_count | cluster_normalized_count            |
|---------------|---------------|---------------|-------------------------------------|
| 0             | 0             | 0             | 0                                   |
| 56(56,0,0,2)  | 3.21(3.21,0.0 | 56(56,0,0,2)  | 3.21(3.21,0.00,0.00,0.11)           |
| 0             | 0             | 0             | 0                                   |
| 1027(1026,1   | 58.93(58.87,5 | 1078(1077,1   | 61.85(61.79,60.88,60.82,59.90)      |
| 0             | 0             | 0             | 0                                   |
| 0             | 0             | 0             | 0                                   |
| 0             | 0             | 0             | 0                                   |
| 86(85,0,0,0)  | 4.93(4.88,0.0 | 86(85,0,0,0)  | 4.93(4.88,0.00,0.00,0.00)           |
| 19(14,19,14,1 | 1.09(0.80,1.0 | 19(14,19,14,1 | 1.09(0.80,1.09,0.80,0.80)           |
| 0             | 0             | 0             | 0                                   |
| 8162(8096,6   | 227.04(225.2  | 8232(8166,6   | 228.99(227.15,187.18,186.29,197.72) |
| 3285(3192,0,  | 91.38(88.79,  | 3322(3216,0,  | 92.41(89.46,0.00,0.00,2.67)         |
| 4011(3981,3,  | 111.57(110.7  | 4011(3981,3,  | 111.57(110.74,0.08,0.08,1.39)       |
| 3865(3864,3   | 107.51(107.4  | 3999(3992,3   | 111.24(111.04,106.45,106.32,107.59) |
| 5071(5054,4   | 141.06(140.5  | 5116(5099,4   | 142.31(141.84,132.94,132.55,133.30) |
| 42(35,18,12,1 | 1.17(0.97,0.5 | 43(36,18,12,1 | 1.20(1.00,0.50,0.33,0.39)           |
| 2(2,0,0,0)    | 0.06(0.06,0.0 | 2(2,0,0,0)    | 0.06(0.06,0.00,0.00,0.00)           |
| 105(105,0,0,  | 2.92(2.92,0.0 | 106(105,0,0,  | 2.95(2.92,0.00,0.00,0.00)           |
| 15018(14971   | 417.75(416.4  | 23046(22968   | 641.06(638.89,630.24,628.13,484.34) |
| 0             | 0             | 0             | 0                                   |
| 0             | 0             | 0             | 0                                   |
| 1449(1443,0,  | 53.94(53.72,  | 1459(1452,0,  | 54.31(54.05,0.00,0.00,0.22)         |
| 0             | 0             | 0             | 0                                   |
| 3151(3147,31  | 117.30(117.1  | 3151(3147,31  | 117.30(117.15,115.92,115.81,115.17) |
| 0             | 0             | 0             | 0                                   |
| 26(26,4,4,18) | 0.97(0.97,0.1 | 26(26,4,4,18) | 0.97(0.97,0.15,0.15,0.67)           |
| 0             | 0             | 0             | 0                                   |
| 3(3,0,0,0)    | 0.11(0.11,0.0 | 3(3,0,0,0)    | 0.11(0.11,0.00,0.00,0.00)           |
| 8355(8346,8   | 311.01(310.6  | 12284(12268   | 457.27(456.68,453.55,452.99,444.99) |
| 0             | 0             | 0             | 0                                   |
| 0             | 0             | 0             | 0                                   |
| 1273(1266,0,  | 44.32(44.07,  | 1275(1268,0,  | 44.39(44.14,0.00,0.00,0.84)         |
| 2274(2273,0,  | 79.16(79.13,  | 2274(2273,0,  | 79.16(79.13,0.00,0.00,0.70)         |
| 2032(2030,2   | 70.74(70.67,  | 2123(2121,2   | 73.91(73.84,73.07,73.00,71.71)      |
| 0             | 0             | 0             | 0                                   |
| 11(11,0,0,6)  | 0.38(0.38,0.0 | 11(11,0,0,6)  | 0.38(0.38,0.00,0.00,0.21)           |
| 0             | 0             | 0             | 0                                   |
| 0             | 0             | 0             | 0                                   |
| 3165(3161,31  | 110.18(110.0  | 3375(3370,3   | 117.49(117.32,115.58,115.40,115.71) |
| 0             | 0             | 0             | 0                                   |
| 6105(6088,51  | 166.30(165.8  | 6142(6125,51  | 167.31(166.84,139.90,139.50,146.22) |
| 1744(1696,0,  | 47.51(46.20,  | 1748(1700,0,  | 47.62(46.31,0.00,0.00,0.93)         |



|              |               |              |                           |
|--------------|---------------|--------------|---------------------------|
| 0            | 0             | 0            | 0                         |
| 0            | 0             | 0            | 0                         |
| 0            | 0             | 0            | 0                         |
| 2(2,2,2,2)   | 0.13(0.13,0.1 | 2(2,2,2,2)   | 0.13(0.13,0.13,0.13,0.13) |
| 0            | 0             | 0            | 0                         |
| 0            | 0             | 0            | 0                         |
| 0            | 0             | 0            | 0                         |
| 0            | 0             | 0            | 0                         |
| 0            | 0             | 0            | 0                         |
| 0            | 0             | 0            | 0                         |
| 0            | 0             | 0            | 0                         |
| 0            | 0             | 0            | 0                         |
| 0            | 0             | 0            | 0                         |
| 18(2,18,2,2) | 1.41(0.16,1.4 | 18(2,18,2,2) | 1.41(0.16,1.41,0.16,0.16) |
| 0            | 0             | 0            | 0                         |
| 0            | 0             | 0            | 0                         |
| 0            | 0             | 0            | 0                         |
| 0            | 0             | 0            | 0                         |
| 0            | 0             | 0            | 0                         |
| 2(2,2,2,2)   | 0.13(0.13,0.1 | 2(2,2,2,2)   | 0.13(0.13,0.13,0.13,0.13) |
| 0            | 0             | 0            | 0                         |
| 0            | 0             | 0            | 0                         |
| 0            | 0             | 0            | 0                         |
| 2(2,2,2,2)   | 0.13(0.13,0.1 | 2(2,2,2,2)   | 0.13(0.13,0.13,0.13,0.13) |
| 0            | 0             | 0            | 0                         |

th both primers, same junction on paired reads with at least a primer).

0000.

725840, 36710848, 25324959, 30161120, 22185877, 15869342, 12758257, 18881995 and 15093  
der and the position of the end of leader identified in the most common reads (peak count) on tl





3231, excluding the mapped reads unpaired, not primary alignment and supplementary alignment to the reference genome, and "ref\_TRS\_start" and "peak\_TRS\_start" refer to the reference position







it.

of the start of TRS and the position of the start of TRS identified in the most common reads (pea





k count) on the reference genome.

|         | subgenome | peak_leader_peak_TRS_start | ACGAAC | ATG_position |       |
|---------|-----------|----------------------------|--------|--------------|-------|
| S1-Day1 | S         | 65                         | 21552  | yes          | 21563 |
|         | ORF3a     | 69                         | 25385  | yes          | 25393 |
|         | E         | 69                         | 26237  | yes          | 26245 |
|         | M         | 65                         | 26469  | yes          | 26523 |
|         | ORF6      | 69                         | 27041  | yes          | 27202 |
|         | ORF7a     | 69                         | 27388  | yes          | 27394 |
|         | ORF8      | 65                         | 27884  | yes          | 27894 |
|         | N         | 64                         | 28255  | yes          | 28274 |
| S2-Day2 | S         | 65                         | 21552  | yes          | 21563 |
|         | ORF3a     | 69                         | 25385  | yes          | 25393 |
|         | E         | 69                         | 26237  | yes          | 26245 |
|         | M         | 65                         | 26469  | yes          | 26523 |
|         | ORF6      | 69                         | 27041  | yes          | 27202 |
|         | ORF7a     | 69                         | 27388  | yes          | 27394 |
|         | ORF8      | 65                         | 27884  | yes          | 27894 |
|         | N         | 64                         | 28255  | yes          | 28274 |
| S3-Day3 | S         | 65                         | 21552  | yes          | 21563 |
|         | ORF3a     | 69                         | 25385  | yes          | 25393 |
|         | E         | 69                         | 26237  | yes          | 26245 |
|         | M         | 65                         | 26469  | yes          | 26523 |
|         | ORF6      | 69                         | 27041  | yes          | 27202 |
|         | ORF7a     | 69                         | 27388  | yes          | 27394 |
|         | N         | 64                         | 28255  | yes          | 28274 |
|         | S         | 65                         | 21552  | yes          | 21563 |
| S1-Day4 | ORF3a     | 69                         | 25385  | yes          | 25393 |
|         | M         | 64                         | 26468  | yes          | 26523 |
|         | ORF6      | 69                         | 27041  | yes          | 27202 |
|         | ORF7a     | 69                         | 27388  | yes          | 27394 |
|         | ORF8      | 65                         | 27884  | yes          | 27894 |
|         | N         | 64                         | 28255  | yes          | 28274 |
|         | S         | 65                         | 21552  | yes          | 21563 |
|         | ORF3a     | 69                         | 25385  | yes          | 25393 |
| S2-Day5 | E         | 69                         | 26237  | yes          | 26245 |
|         | M         | 64                         | 26468  | yes          | 26523 |
|         | ORF7a     | 69                         | 27388  | yes          | 27394 |
|         | ORF7b     | 65                         | 27644  | no           | 27756 |
|         | ORF8      | 65                         | 27884  | yes          | 27894 |
|         | N         | 64                         | 28255  | yes          | 28274 |
|         | E         | 69                         | 26237  | yes          | 26245 |
|         | ORF6      | 69                         | 27041  | yes          | 27202 |
| S3-Day6 | ORF7a     | 69                         | 27388  | yes          | 27394 |
|         | N         | 65                         | 28256  | yes          | 28274 |

|          |       |    |       |     |       |
|----------|-------|----|-------|-----|-------|
|          | ORF6  | 69 | 27041 | yes | 27202 |
| S2-Day8  | ORF8  | 65 | 27884 | yes | 27894 |
|          | N     | 65 | 28256 | yes | 28274 |
|          | ORF10 | 65 | 29530 | no  | 29538 |
| S3-Day9  | M     | 65 | 26469 | yes | 26523 |
|          | N     | 65 | 28256 | yes | 28274 |
|          | ORF3a | 69 | 25385 | yes | 25393 |
|          | E     | 69 | 26237 | yes | 26245 |
| S2-Day11 | M     | 65 | 26469 | yes | 26523 |
|          | ORF6  | 69 | 27041 | yes | 27202 |
|          | N     | 65 | 28256 | yes | 28274 |
|          | S     | 65 | 21552 | yes | 21563 |
| S3-Day12 | ORF3a | 69 | 25385 | yes | 25393 |
|          | ORF6  | 69 | 27041 | yes | 27202 |
|          | N     | 64 | 28255 | yes | 28274 |
| S3-Day14 | M     | 65 | 26469 | yes | 26523 |
|          | N     | 65 | 28256 | yes | 28274 |

“peak\_leader” and “peak\_TRS\_start” point to the leader-TRS junctions in sheet "kr

The numbers in the bracket are (reads with left primers, reads with right primers, 1  
Normalized count=(Read count/Total number of read mapped on reference genom  
Total number of read mapped on reference genome is 36593897, 37733596, 3322



| 20_leader_seq         | TRS_seq         | first_orf_aa                       |
|-----------------------|-----------------|------------------------------------|
| ATCTCTTGATAGATCTGTTCT | CTAAACGAACA     | MFVFLVLLPLVSSQCVNLTRTQLPPAYTNSF    |
| CTTGATAGATCTGTTCTCTAA | ACGAACTT        | MDLFMRIFTIGTVTLKQGEIKDATPSDFVRAI   |
| CTTGATAGATCTGTTCTCTAA | ACGAACTT        | MYSFVSEETGTLIVNSVLLFLAFVVFLVTLAIL  |
| ATCTCTTGATAGATCTGTTCT | CTAAACGAAC      | MADSNNGTITVEELKKLLEQWNLVIGFLFTW    |
| CTTGATAGATCTGTTCTCTAA | ACGAACTT        | MFHLVDFQVTIAEILLIIMRTFKVSIWNLDYIII |
| CTTGATAGATCTGTTCTCTAA | ACGAACTT        | MKIIIFLALITLATCELYHYQECVRGTTVLLKEF |
| ATCTCTTGATAGATCTGTTCT | CTAAACGAAC      | MKFLVFLGIITVAAFHQECSLQSQCTQHQPYP   |
| GATCTCTTGATAGATCTGTTC | TCTAAACGAACAAAC | MSDNGPQNQRNAPRITFGGSPDSTGNSQN      |
| ATCTCTTGATAGATCTGTTCT | CTAAACGAACA     | MFVFLVLLPLVSSQCVNLTRTQLPPAYTNSF    |
| CTTGATAGATCTGTTCTCTAA | ACGAACTT        | MDLFMRIFTIGTVTLKQGEIKDATPSDFVRAI   |
| CTTGATAGATCTGTTCTCTAA | ACGAACTT        | MYSFVSEETGTLIVNSVLLFLAFVVFLVTLAIL  |
| ATCTCTTGATAGATCTGTTCT | CTAAACGAAC      | MADSNNGTITVEELKKLLEQWNLVIGFLFTW    |
| CTTGATAGATCTGTTCTCTAA | ACGAACTT        | MFHLVDFQVTIAEILLIIMRTFKVSIWNLDYIII |
| CTTGATAGATCTGTTCTCTAA | ACGAACTT        | MKIIIFLALITLATCELYHYQECVRGTTVLLKEF |
| ATCTCTTGATAGATCTGTTCT | CTAAACGAAC      | MKFLVFLGIITVAAFHQECSLQSQCTQHQPYP   |
| GATCTCTTGATAGATCTGTTC | TCTAAACGAACAAAC | MSDNGPQNQRNAPRITFGGSPDSTGNSQN      |
| ATCTCTTGATAGATCTGTTCT | CTAAACGAACA     | MFVFLVLLPLVSSQCVNLTRTQLPPAYTNSF    |
| CTTGATAGATCTGTTCTCTAA | ACGAACTT        | MDLFMRIFTIGTVTLKQGEIKDATPSDFVRAI   |
| CTTGATAGATCTGTTCTCTAA | ACGAACTT        | MYSFVSEETGTLIVNSVLLFLAFVVFLVTLAIL  |
| ATCTCTTGATAGATCTGTTCT | CTAAACGAAC      | MADSNNGTITVEELKKLLEQWNLVIGFLFTW    |
| CTTGATAGATCTGTTCTCTAA | ACGAACTT        | MFHLVDFQVTIAEILLIIMRTFKVSIWNLDYIII |
| CTTGATAGATCTGTTCTCTAA | ACGAACTT        | MKIIIFLALITLATCELYHYQECVRGTTVLLKEF |
| ATCTCTTGATAGATCTGTTCT | CTAAACGAAC      | MKFLVFLGIITVAAFHQECSLQSQCTQHQPYP   |
| GATCTCTTGATAGATCTGTTC | TCTAAACGAACAAAC | MSDNGPQNQRNAPRITFGGSPDSTGNSQN      |
| ATCTCTTGATAGATCTGTTCT | CTAAACGAACA     | MFVFLVLLPLVSSQCVNLTRTQLPPAYTNSF    |
| CTTGATAGATCTGTTCTCTAA | ACGAACTT        | MDLFMRIFTIGTVTLKQGEIKDATPSDFVRAI   |
| CTTGATAGATCTGTTCTCTAA | ACGAACTT        | MYSFVSEETGTLIVNSVLLFLAFVVFLVTLAIL  |
| ATCTCTTGATAGATCTGTTCT | CTAAACGAAC      | MADSNNGTITVEELKKLLEQWNLVIGFLFTW    |
| CTTGATAGATCTGTTCTCTAA | ACGAACTT        | MFHLVDFQVTIAEILLIIMRTFKVSIWNLDYIII |
| CTTGATAGATCTGTTCTCTAA | ACGAACTT        | MKIIIFLALITLATCELYHYQECVRGTTVLLKEF |
| ATCTCTTGATAGATCTGTTCT | CTAAACGAAC      | MKFLVFLGIITVAAFHQECSLQSQCTQHQPYP   |
| GATCTCTTGATAGATCTGTTC | TCTAAACGAACAAAC | MSDNGPQNQRNAPRITFGGSPDSTGNSQN      |
| CTTGATAGATCTGTTCTCTAA | ACGAACTT        | MYSFVSEETGTLIVNSVLLFLAFVVFLVTLAIL  |
| CTTGATAGATCTGTTCTCTAA | ACGAACTT        | MFHLVDFQVTIAEILLIIMRTFKVSIWNLDYIII |
| CTTGATAGATCTGTTCTCTAA | ACGAACTT        | MKIIIFLALITLATCELYHYQECVRGTTVLLKEF |
| ATCTCTTGATAGATCTGTTCT | CTAAACGAACAAAC  | MSDNGPQNQRNAPRITFGGSPDSTGNSQN      |

|                       |                                                    |
|-----------------------|----------------------------------------------------|
| CTTGATAGATCTGTTCTCTAA | ACGAACGCTTTCTTA MFHLVDFQVTIAEILLIIMRTFKVSIWNLDYIII |
| ATCTCTTGATAGATCTGTTCT | CTAAACGAAC MKFLVFLGIITTVAAFHQECSLQSQCTQHQPYN       |
| ATCTCTTGATAGATCTGTTCT | CTAAACGAACAAACI MSDNGPQNQRNAPRITFGGPSDSTGNSQN      |
| ATCTCTTGATAGATCTGTTCT | CTAAACTC MQTTQGRWAI*                               |
| ATCTCTTGATAGATCTGTTCT | CTAAACGAACATAAAT MADSNGTITVEELKKLLEQWNLVIGFLFTW    |
| ATCTCTTGATAGATCTGTTCT | CTAAACGAACAAACI MSDNGPQNQRNAPRITFGGPSDSTGNSQN      |
| CTTGATAGATCTGTTCTCTAA | ACGAACTT MDLFMRIFTIGTVTLKQGEIKDATPSDFVRAI          |
| CTTGATAGATCTGTTCTCTAA | ACGAACTT MYSFVSEETGTLIVNSVLLFLAFVVFLLVTLAIL        |
| ATCTCTTGATAGATCTGTTCT | CTAAACGAACATAAAT MADSNGTITVEELKKLLEQWNLVIGFLFTW    |
| CTTGATAGATCTGTTCTCTAA | ACGAACGCTTTCTTA MFHLVDFQVTIAEILLIIMRTFKVSIWNLDYIII |
| ATCTCTTGATAGATCTGTTCT | CTAAACGAACAAACI MSDNGPQNQRNAPRITFGGPSDSTGNSQN      |
| ATCTCTTGATAGATCTGTTCT | CTAAACGAACA MFVFLVLLPLVSSQCVNLTRTQLPPAYTNSF        |
| CTTGATAGATCTGTTCTCTAA | ACGAACTT MDLFMRIFTIGTVTLKQGEIKDATPSDFVRAI          |
| CTTGATAGATCTGTTCTCTAA | ACGAACGCTTTCTTA MFHLVDFQVTIAEILLIIMRTFKVSIWNLDYIII |
| GATCTCTTGATAGATCTGTTC | TCTAAACGAACAAAC MSDNGPQNQRNAPRITFGGPSDSTGNSQN      |
| ATCTCTTGATAGATCTGTTCT | CTAAACGAACATAAAT MADSNGTITVEELKKLLEQWNLVIGFLFTW    |
| ATCTCTTGATAGATCTGTTCT | CTAAACGAACAAACI MSDNGPQNQRNAPRITFGGPSDSTGNSQN      |

rown", "ACGAAC" indicates if there is a ACGAAC sequence in the "TRS\_seq" (TRS sequences), '

reads with both primers, same junction on paired reads with at least a primer).

ne)\*1000000.

2295, 33949503, 28220017, 28624584, 16048939, 12949851, 17312079, 17029467, 2051243!

TRGVVYYPDKVFRSSVLHSTQDLFLPFFSNVTWFHAIHVSGTNGTKRFDNPVLPFNDGVVFASTTEKSNIIRGWII  
TATIPIQASLPGWLIVGVALLAVFQSASKIITLKKRWQLALSCKGVHFVCNLLLLFVTVYSHLLLVAAGLEAPFLYL  
\_TALRLCAYCCNIVNVSLVKPSFYVYSRVKNLNSSRVPDLLV\*  
'ICLLQFAYANRNRFLYIIKLIFLWLLWPVTLACFVLAAYRINWITGGIAIAMAACLVGLMWLSYFIASFRLFARTF  
NLIKNLSKSLTENKYSQLDEEQPMEID\*  
PSSGTYEGNSPFHPLADNKFALTCFSTQFAFACPDGVKHVYQLRARSVSPKLFIRQEEVQELYSPIFLIVAAIVFI  
VDDPCPIHFYSKWYIRVGARKSAPLIELCVDEAGSKSPIQYIDIGNYTVSCLPFTINCQEPKLGSLVVRCSFYEDF  
IGERSGARKSQRPPQGLPNNTASWFTALTQHGKEDLKFPRGQGVPIINTNSSPDDQIGYYRRATRRIRGGDGK  
TRGVVYYPDKVFRSSVLHSTQDLFLPFFSNVTWFHAIHVSGTNGTKRFDNPVLPFNDGVVFASTTEKSNIIRGWII  
TATIPIQASLPGWLIVGVALLAVFQSASKIITLKKRWQLALSCKGVHFVCNLLLLFVTVYSHLLLVAAGLEAPFLYL  
\_TALRLCAYCCNIVNVSLVKPSFYVYSRVKNLNSSRVPDLLV\*  
'ICLLQFAYANRNRFLYIIKLIFLWLLWPVTLACFVLAAYRINWITGGIAIAMAACLVGLMWLSYFIASFRLFARTF  
NLIKNLSKSLTENKYSQLDEEQPMEID\*  
PSSGTYEGNSPFHPLADNKFALTCFSTQFAFACPDGVKHVYQLRARSVSPKLFIRQEEVQELYSPIFLIVAAIVFI  
VDDPCPIHFYSKWYIRVGARKSAPLIELCVDEAGSKSPIQYIDIGNYTVSCLPFTINCQEPKLGSLVVRCSFYEDF  
IGERSGARKSQRPPQGLPNNTASWFTALTQHGKEDLKFPRGQGVPIINTNSSPDDQIGYYRRATRRIRGGDGK  
TRGVVYYPDKVFRSSVLHSTQDLFLPFFSNVTWFHAIHVSGTNGTKRFDNPVLPFNDGVVFASTTEKSNIIRGWII  
TATIPIQASLPGWLIVGVALLAVFQSASKIITLKKRWQLALSCKGVHFVCNLLLLFVTVYSHLLLVAAGLEAPFLYL  
\_TALRLCAYCCNIVNVSLVKPSFYVYSRVKNLNSSRVPDLLV\*  
'ICLLQFAYANRNRFLYIIKLIFLWLLWPVTLACFVLAAYRINWITGGIAIAMAACLVGLMWLSYFIASFRLFARTF  
NLIKNLSKSLTENKYSQLDEEQPMEID\*  
PSSGTYEGNSPFHPLADNKFALTCFSTQFAFACPDGVKHVYQLRARSVSPKLFIRQEEVQELYSPIFLIVAAIVFI  
VDDPCPIHFYSKWYIRVGARKSAPLIELCVDEAGSKSPIQYIDIGNYTVSCLPFTINCQEPKLGSLVVRCSFYEDF  
IGERSGARKSQRPPQGLPNNTASWFTALTQHGKEDLKFPRGQGVPIINTNSSPDDQIGYYRRATRRIRGGDGK  
TRGVVYYPDKVFRSSVLHSTQDLFLPFFSNVTWFHAIHVSGTNGTKRFDNPVLPFNDGVVFASTTEKSNIIRGWII  
TATIPIQASLPGWLIVGVALLAVFQSASKIITLKKRWQLALSCKGVHFVCNLLLLFVTVYSHLLLVAAGLEAPFLYL  
\_TALRLCAYCCNIVNVSLVKPSFYVYSRVKNLNSSRVPDLLV\*  
'ICLLQFAYANRNRFLYIIKLIFLWLLWPVTLACFVLAAYRINWITGGIAIAMAACLVGLMWLSYFIASFRLFARTF  
NLIKNLSKSLTENKYSQLDEEQPMEID\*  
PSSGTYEGNSPFHPLADNKFALTCFSTQFAFACPDGVKHVYQLRARSVSPKLFIRQEEVQELYSPIFLIVAAIVFI  
DHNETCHA\*  
VDDPCPIHFYSKWYIRVGARKSAPLIELCVDEAGSKSPIQYIDIGNYTVSCLPFTINCQEPKLGSLVVRCSFYEDF  
IGERSGARKSQRPPQGLPNNTASWFTALTQHGKEDLKFPRGQGVPIINTNSSPDDQIGYYRRATRRIRGGDGK  
\_TALRLCAYCCNIVNVSLVKPSFYVYSRVKNLNSSRVPDLLV\*  
NLIKNLSKSLTENKYSQLDEEQPMEID\*  
PSSGTYEGNSPFHPLADNKFALTCFSTQFAFACPDGVKHVYQLRARSVSPKLFIRQEEVQELYSPIFLIVAAIVFI  
IGERSGARKSQRPPQGLPNNTASWFTALTQHGKEDLKFPRGQGVPIINTNSSPDDQIGYYRRATRRIRGGDGK

NLIKNLSKSLTENKYSQLDEEQPMEID\*  
JVDDPCPIHFYSKWYIRVGARKSAPLIELCVDEAGSKSPIQYIDIGNYTVSCLPFTINCQEPKLGSLVVRCSFYEDF  
IGERSGARSKQRRPQGLPNNTASWFTALTQHGKEDLKFPRGQGVPIINTNSSPDDQIGYYRRATRRIRGGDGK

'ICLLQFAYANRNRFLYIIKLIFLWLLWPVTLACFVLAAYRINWITGGIAIAMAACLVGLMWLSYFIASFRLFARTF  
IGERSGARSKQRRPQGLPNNTASWFTALTQHGKEDLKFPRGQGVPIINTNSSPDDQIGYYRRATRRIRGGDGK  
TATIPIQASLPFGWLIVGVALLAVFQSASKIITLKKRWQLALSkgVHFVCNLLLLFVTVYSHLLLVAAGLEAPFLYL  
\_TALRLCAYCCNIVNVSLVKPSFYVYSRVKNLNSSRVPDLLV\*

'ICLLQFAYANRNRFLYIIKLIFLWLLWPVTLACFVLAAYRINWITGGIAIAMAACLVGLMWLSYFIASFRLFARTF  
NLIKNLSKSLTENKYSQLDEEQPMEID\*

IGERSGARSKQRRPQGLPNNTASWFTALTQHGKEDLKFPRGQGVPIINTNSSPDDQIGYYRRATRRIRGGDGK  
=TRGVYYPDKVFRSSVLHSTQDLFLPFFSNVTWFHAIHVSGTNGTKRFDNPVLPFNDGVYFASTEKSNIIRGWII  
TATIPIQASLPFGWLIVGVALLAVFQSASKIITLKKRWQLALSkgVHFVCNLLLLFVTVYSHLLLVAAGLEAPFLYL  
NLIKNLSKSLTENKYSQLDEEQPMEID\*

IGERSGARSKQRRPQGLPNNTASWFTALTQHGKEDLKFPRGQGVPIINTNSSPDDQIGYYRRATRRIRGGDGK

'ICLLQFAYANRNRFLYIIKLIFLWLLWPVTLACFVLAAYRINWITGGIAIAMAACLVGLMWLSYFIASFRLFARTF  
IGERSGARSKQRRPQGLPNNTASWFTALTQHGKEDLKFPRGQGVPIINTNSSPDDQIGYYRRATRRIRGGDGK  
"20\_leader\_seq" refers to the 20 nucleotides before the end of leader, and "AUG\_postion" and

5 and 10143083, excluding the mapped reads unpaired, not primary alignment and supplement

FGTTLDSKTQSLIVNNATNVVIVKVEFQFCNDPFLGVVYHKNKSWMESEFRVYSSANNCTFEYVSQPFLMI  
.YALVYFLQSINFVRIIMRLWLCWKCRSKNPLLYDANYFLCWHTNCYDYCIPYNSVTSSIVITSGDGTTSPISEHD

SMWSFNPETNILLNVPLHGTILTRPPESELVIGAVILRGHLRIAGHHLGRCDIKDLPKEITVATSRTLSYYKLAGA

ITLCFTLKRKTE\*

LEYHDVRVVLDFI\*

MKDLSRWWYFYLLGTGPEAGLPYGANKDGIWVATEGALNTPKDHIGTRNPANNAIIVLQLPQGTTLPKGF)  
FGTTLDSKTQSLIVNNATNVVIVKVEFQFCNDPFLGVVYHKNKSWMESEFRVYSSANNCTFEYVSQPFLMI  
.YALVYFLQSINFVRIIMRLWLCWKCRSKNPLLYDANYFLCWHTNCYDYCIPYNSVTSSIVITSGDGTTSPISEHD

SMWSFNPETNILLNVPLHGTILTRPPESELVIGAVILRGHLRIAGHHLGRCDIKDLPKEITVATSRTLSYYKLAGA

ITLCFTLKRKTE\*

LEYHDVRVVLDFI\*

MKDLSRWWYFYLLGTGPEAGLPYGANKDGIWVATEGALNTPKDHIGTRNPANNAIIVLQLPQGTTLPKGF)  
FGTTLDSKTQSLIVNNATNVVIVKVEFQFCNDPFLGVVYHKNKSWMESEFRVYSSANNCTFEYVSQPFLMI  
.YALVYFLQSINFVRIIMRLWLCWKCRSKNPLLYDANYFLCWHTNCYDYCIPYNSVTSSIVITSGDGTTSPISEHD

SMWSFNPETNILLNVPLHGTILTRPPESELVIGAVILRGHLRIAGHHLGRCDIKDLPKEITVATSRTLSYYKLAGA

ITLCFTLKRKTE\*

MKDLSRWWYFYLLGTGPEAGLPYGANKDGIWVATEGALNTPKDHIGTRNPANNAIIVLQLPQGTTLPKGF)  
FGTTLDSKTQSLIVNNATNVVIVKVEFQFCNDPFLGVVYHKNKSWMESEFRVYSSANNCTFEYVSQPFLMI  
.YALVYFLQSINFVRIIMRLWLCWKCRSKNPLLYDANYFLCWHTNCYDYCIPYNSVTSSIVITSGDGTTSPISEHD

SMWSFNPETNILLNVPLHGTILTRPPESELVIGAVILRGHLRIAGHHLGRCDIKDLPKEITVATSRTLSYYKLAGA

ITLCFTLKRKTE\*

LEYHDVRVVLDFI\*

MKDLSRWWYFYLLGTGPEAGLPYGANKDGIWVATEGALNTPKDHIGTRNPANNAIIVLQLPQGTTLPKGF)  
FGTTLDSKTQSLIVNNATNVVIVKVEFQFCNDPFLGVVYHKNKSWMESEFRVYSSANNCTFEYVSQPFLMI  
.YALVYFLQSINFVRIIMRLWLCWKCRSKNPLLYDANYFLCWHTNCYDYCIPYNSVTSSIVITSGDGTTSPISEHD

SMWSFNPETNILLNVPLHGTILTRPPESELVIGAVILRGHLRIAGHHLGRCDIKDLPKEITVATSRTLSYYKLAGA

ITLCFTLKRKTE\*

LEYHDVRVVLDFI\*

MKDLSRWWYFYLLGTGPEAGLPYGANKDGIWVATEGALNTPKDHIGTRNPANNAIIVLQLPQGTTLPKGF)

ITLCFTLKRKTE\*

MKDLSRWWYFYLLGTGPEAGLPYGANKDGIWVATEGALNTPKDHIGTRNPANNAIIVLQLPQGTTLPKGF)

LEYHDVRRVLDFI\*

.MKDLSPRWYFYLLGTGPEAGLPYGANKDGIWVATEGALNTPKDHIGTRNPANNAIVLQLPQGTTLPKGF)

SMWSFNPETNILLNVPLHGTILTRPPESELVIGAVILRGHLRIAGHHLGRCDIKDLPKEITVATSRTLSYYKLGA!

.MKDLSPRWYFYLLGTGPEAGLPYGANKDGIWVATEGALNTPKDHIGTRNPANNAIVLQLPQGTTLPKGF)

.YALVYFLQSINFVRIIMRLWLCWKCRSKNPLLYDANYFLCWHTNCYDYCIPYNSVTSSIVITSGDGTTSPISEHD

SMWSFNPETNILLNVPLHGTILTRPPESELVIGAVILRGHLRIAGHHLGRCDIKDLPKEITVATSRTLSYYKLGA!

.MKDLSPRWYFYLLGTGPEAGLPYGANKDGIWVATEGALNTPKDHIGTRNPANNAIVLQLPQGTTLPKGF)

FGTTLDSKTQSLIVNATNVVIVKVEFCNDPFLGVVYHKNNKSWMESEFRVYSSANNCTFEYVSQPFLMI

.YALVYFLQSINFVRIIMRLWLCWKCRSKNPLLYDANYFLCWHTNCYDYCIPYNSVTSSIVITSGDGTTSPISEHD

.MKDLSPRWYFYLLGTGPEAGLPYGANKDGIWVATEGALNTPKDHIGTRNPANNAIVLQLPQGTTLPKGF)

SMWSFNPETNILLNVPLHGTILTRPPESELVIGAVILRGHLRIAGHHLGRCDIKDLPKEITVATSRTLSYYKLGA!

.MKDLSPRWYFYLLGTGPEAGLPYGANKDGIWVATEGALNTPKDHIGTRNPANNAIVLQLPQGTTLPKGF)

“first\_orf\_aa” refer to the first AUG position and translated orf of the sgmRNA.



ary alignment.

DLGKQGNFKNLREFVFKNIDGYFKIYSKHTPINLVRDLPQGFSALEPLVDLPIGINITRFQTLALHRSYLTPGDS  
YQIGGYTEKWESGVKDCVVLHSYFTSDYYQLYSTQLSTDTGVEHVTFIYNKIVDEPEEHVQIHTIDGSSGVVN

SQRVAGDSGFAAYSRYRIGNYKLNTDHSSSSDNIALLVQ\*

IAEGSRGGSQASSRSSSRNSSRNSTPGSSRGTSPARMAGNGGDAALALLLDRLNQLESKMSGKGQQQQ  
DLGKQGNFKNLREFVFKNIDGYFKIYSKHTPINLVRDLPQGFSALEPLVDLPIGINITRFQTLALHRSYLTPGDS  
YQIGGYTEKWESGVKDCVVLHSYFTSDYYQLYSTQLSTDTGVEHVTFIYNKIVDEPEEHVQIHTIDGSSGVVN

SQRVAGDSGFAAYSRYRIGNYKLNTDHSSSSDNIALLVQ\*

IAEGSRGGSQASSRSSSRNSSRNSTPGSSRGTSPARMAGNGGDAALALLLDRLNQLESKMSGKGQQQQ  
DLGKQGNFKNLREFVFKNIDGYFKIYSKHTPINLVRDLPQGFSALEPLVDLPIGINITRFQTLALHRSYLTPGDS  
YQIGGYTEKWESGVKDCVVLHSYFTSDYYQLYSTQLSTDTGVEHVTFIYNKIVDEPEEHVQIHTIDGSSGVVN

SQRVAGDSGFAAYSRYRIGNYKLNTDHSSSSDNIALLVQ\*

IAEGSRGGSQASSRSSSRNSSRNSTPGSSRGTSPARMAGNGGDAALALLLDRLNQLESKMSGKGQQQQ  
DLGKQGNFKNLREFVFKNIDGYFKIYSKHTPINLVRDLPQGFSALEPLVDLPIGINITRFQTLALHRSYLTPGDS  
YQIGGYTEKWESGVKDCVVLHSYFTSDYYQLYSTQLSTDTGVEHVTFIYNKIVDEPEEHVQIHTIDGSSGVVN  
SQRVAGDSGFAAYSRYRIGNYKLNTDHSSSSDNIALLVQ\*

IAEGSRGGSQASSRSSSRNSSRNSTPGSSRGTSPARMAGNGGDAALALLLDRLNQLESKMSGKGQQQQ  
DLGKQGNFKNLREFVFKNIDGYFKIYSKHTPINLVRDLPQGFSALEPLVDLPIGINITRFQTLALHRSYLTPGDS  
YQIGGYTEKWESGVKDCVVLHSYFTSDYYQLYSTQLSTDTGVEHVTFIYNKIVDEPEEHVQIHTIDGSSGVVN

SQRVAGDSGFAAYSRYRIGNYKLNTDHSSSSDNIALLVQ\*

IAEGSRGGSQASSRSSSRNSSRNSTPGSSRGTSPARMAGNGGDAALALLLDRLNQLESKMSGKGQQQQ

IAEGSRGGSQASSRSSSRNSSRNSTPGSSRGTSPARMAGNGGDAALALLLDRLNQLESKMSGKGQQQQ

YAEGRGGSQASSRSSSRNRNSTRNPGSSRGTSPARMAGNGGDAALALLLDRLNQLESKMSGKGQQQQ

SQRVAGDSGFAAYSRYRIGNYKLNTDHSSSSDNIALLVQ\*

YAEGRGGSQASSRSSSRNRNSTRNPGSSRGTSPARMAGNGGDAALALLLDRLNQLESKMSGKGQQQQ

YQIGGYTEKWESGVKDCVVLHSYFTSDYYQLYSTQLSTDTGVEHVTFIYNKIVDEPEEHVQIHTIDGSSGVVN

SQRVAGDSGFAAYSRYRIGNYKLNTDHSSSSDNIALLVQ\*

YAEGRGGSQASSRSSSRNRNSTRNPGSSRGTSPARMAGNGGDAALALLLDRLNQLESKMSGKGQQQQ

DLEGKQGNFKNLREFVFNIDGYFKIYSKHTPINLVRDLPQGFSALEPLVDLPIGINITRFQTLALHRSYLTPGDS

YQIGGYTEKWESGVKDCVVLHSYFTSDYYQLYSTQLSTDTGVEHVTFIYNKIVDEPEEHVQIHTIDGSSGVVN

YAEGRGGSQASSRSSSRNRNSTRNPGSSRGTSPARMAGNGGDAALALLLDRLNQLESKMSGKGQQQQ

SQRVAGDSGFAAYSRYRIGNYKLNTDHSSSSDNIALLVQ\*

YAEGRGGSQASSRSSSRNRNSTRNPGSSRGTSPARMAGNGGDAALALLLDRLNQLESKMSGKGQQQQ



ISSGWTAGAAAYVGYLQPRTFLLKYNENGTITDAVDCALDPLSEKCTLSFTVEKGIYQTSNFRVQPTESIVR  
PVMEPIYDEPTTTTTSVPL\*

.GQTVTKKSAAEASKKPRQKRTATKAYNVTQAFGRRGPEQTQGNFGDQELIRQGTDYKHWPQIAQFAPSAS/  
ISSGWTAGAAAYVGYLQPRTFLLKYNENGTITDAVDCALDPLSEKCTLSFTVEKGIYQTSNFRVQPTESIVR  
PVMEPIYDEPTTTTTSVPL\*

.GQTVTKKSAAEASKKPRQKRTATKAYNVTQAFGRRGPEQTQGNFGDQELIRQGTDYKHWPQIAQFAPSAS/  
ISSGWTAGAAAYVGYLQPRTFLLKYNENGTITDAVDCALDPLSEKCTLSFTVEKGIYQTSNFRVQPTESIVR  
PVMEPIYDEPTTTTTSVPL\*

.GQTVTKKSAAEASKKPRQKRTATKAYNVTQAFGRRGPEQTQGNFGDQELIRQGTDYKHWPQIAQFAPSAS/  
ISSGWTAGAAAYVGYLQPRTFLLKYNENGTITDAVDCALDPLSEKCTLSFTVEKGIYQTSNFRVQPTESIVR  
PVMEPIYDEPTTTTTSVPL\*

.GQTVTKKSAAEASKKPRQKRTATKAYNVTQAFGRRGPEQTQGNFGDQELIRQGTDYKHWPQIAQFAPSAS/  
ISSGWTAGAAAYVGYLQPRTFLLKYNENGTITDAVDCALDPLSEKCTLSFTVEKGIYQTSNFRVQPTESIVR  
PVMEPIYDEPTTTTTSVPL\*

.GQTVTKKSAAEASKKPRQKRTATKAYNVTQAFGRRGPEQTQGNFGDQELIRQGTDYKHWPQIAQFAPSAS/

.GQTVTKKSAAEASKKPRQKRTATKAYNVTQAFGRRGPEQTQGNFGDQELIRQGTDYKHWPQIAQFAPSAS/

.GQTVTKKSAAEASKKPRQKRTATKAYNVTQAFGRRGPEQTQGNFGDQELIRQGTDYKHWPQIAQFAPSAS/

.GQTVTKKSAAEASKKPRQKRTATKAYNVTQAFGRRGPEQTQGNFGDQELIRQGTDYKHWPQIAQFAPSAS/  
PVMEPIYDEPTTTTTSVPL\*

.GQTVTKKSAAEASKKPRQKRTATKAYNVTQAFGRRGPEQTQGNFGDQELIRQGTDYKHWPQIAQFAPSAS/  
;SSGWTAGAAAYVGYLQPRTFLLKYNENGTITDAVDCALDPLSETKCTLKSFTVEKGIYQTSNFRVQPTESIVR  
PVMEPIYDEPTTTTTSVPL\*

.GQTVTKKSAAEASKKPRQKRTATKAYNVTQAFGRRGPEQTQGNFGDQELIRQGTDYKHWPQIAQFAPSAS/

.GQTVTKKSAAEASKKPRQKRTATKAYNVTQAFGRRGPEQTQGNFGDQELIRQGTDYKHWPQIAQFAPSAS/



FPNITNLCPFGEVFNATRFASVYAWNRKRISNCVADYSVLYNSASFSTFKCYGVSPKLNLDLCTNVYADSFVII

AFFGMSRIGMEVTPSGTWLTYTGAIKLDDKDPNFKDQVILLNKHIDAYKTFPPTPEPKDKKKKKADETQALPQR  
FPNITNLCPFGEVFNATRFASVYAWNRKRISNCVADYSVLYNSASFSTFKCYGVSPKLNLDLCTNVYADSFVII

AFFGMSRIGMEVTPSGTWLTYTGAIKLDDKDPNFKDQVILLNKHIDAYKTFPPTPEPKDKKKKKADETQALPQR  
FPNITNLCPFGEVFNATRFASVYAWNRKRISNCVADYSVLYNSASFSTFKCYGVSPKLNLDLCTNVYADSFVII

AFFGMSRIGMEVTPSGTWLTYTGAIKLDDKDPNFKDQVILLNKHIDAYKTFPPTPEPKDKKKKKADETQALPQR  
FPNITNLCPFGEVFNATRFASVYAWNRKRISNCVADYSVLYNSASFSTFKCYGVSPKLNLDLCTNVYADSFVII

AFFGMSRIGMEVTPSGTWLTYTGAIKLDDKDPNFKDQVILLNKHIDAYKTFPPTPEPKDKKKKKADETQALPQR  
FPNITNLCPFGEVFNATRFASVYAWNRKRISNCVADYSVLYNSASFSTFKCYGVSPKLNLDLCTNVYADSFVII

AFFGMSRIGMEVTPSGTWLTYTGAIKLDDKDPNFKDQVILLNKHIDAYKTFPPTPEPKDKKKKKADETQALPQR

AFFGMSRIGMEVTPSGTWLTYTGAIKLDDKDPNFKDQVILLNKHIDAYKTFPPTPEPKDKKKKKADETQALPQR



AFFGMSRIGMEVTPSGTWLTYTGAIKLDDKDPNFKDQVILLNKHIDAYKTFPPTTEPKDKKKKKADETQALPQR

AFFGMSRIGMEVTPSGTWLTYTGAIKLDDKDPNFKDQVILLNKHIDAYKTFPPTTEPKDKKKKKADETQALPQR

AFFGMSRIGMEVTPSGTWLTYTGAIKLDDKDPNFKDQVILLNKHIDAYKTFPPTTEPKDKKKKKADETQALPQR  
FPNITNLCPFGEVFNATRFASVYAWNRKRISNCVADYSVLYNSASFSTFKCYGVSPKLNLCFTNVYADSFVII

AFFGMSRIGMEVTPSGTWLTYTGAIKLDDKDPNFKDQVILLNKHIDAYKTFPPTTEPKDKKKKKADETQALPQR

AFFGMSRIGMEVTPSGTWLTYTGAIKLDDKDPNFKDQVILLNKHIDAYKTFPPTTEPKDKKKKKADETQALPQR



RGDEVRQIAPGQTGKIADYNYKLPDDFTGCVIAWNSNNLDSKVGGNYNLYRLFRKSNLKPFERDISTEIQAC

QKKQQTVTLLPAADLDDFSKQLQQSMSSADSTQA\*  
RGDEVRQIAPGQTGKIADYNYKLPDDFTGCVIAWNSNNLDSKVGGNYNLYRLFRKSNLKPFERDISTEIQAC

QKKQQTVTLLPAADLDDFSKQLQQSMSSADSTQA\*  
RGDEVRQIAPGQTGKIADYNYKLPDDFTGCVIAWNSNNLDSKVGGNYNLYRLFRKSNLKPFERDISTEIQAC

QKKQQTVTLLPAADLDDFSKQLQQSMSSADSTQA\*  
RGDEVRQIAPGQTGKIADYNYKLPDDFTGCVIAWNSNNLDSKVGGNYNLYRLFRKSNLKPFERDISTEIQAC

QKKQQTVTLLPAADLDDFSKQLQQSMSSADSTQA\*  
RGDEVRQIAPGQTGKIADYNYKLPDDFTGCVIAWNSNNLDSKVGGNYNLYRLFRKSNLKPFERDISTEIQAC

QKKQQTVTLLPAADLDDFSKQLQQSMSSADSTQA\*

QKKQQTVTLLPAADLDDFSKQLQQSMSSADSTQA\*

QKKQQTVTLLPAADLDDFSKQLQQSMSSADSTQA\*

QKKQQTVTLLPAADLDDFSKQLQQSMSSADSTQA\*

QKKQQTVTLLPAADLDDFSKQLQQSMSSADSTQA\*

RGDEVQRQIAPGQTGKIADYNYKLPDDFTGCVIAWNSNNLDSKVGGNYNYLYRLFRKSNLKPFERDISTEIYQA(

QKKQQTVTLLPAADLDDFSKQLQQSMSSADSTQA\*

QKKQQTVTLLPAADLDDFSKQLQQSMSSADSTQA\*



3STPCNGVEGFNCYFPLQSYGFQPTNGVGYQPYRVVVLSFELLHAPATVCGPKKSTNLVKNKCVNFNFNGLT(

3STPCNGVEGFNCYFPLQSYGFQPTNGVGYQPYRVVVLSFELLHAPATVCGPKKSTNLVKNKCVNFNFNGLT(

3STPCNGVEGFNCYFPLQSYGFQPTNGVGYQPYRVVVLSFELLHAPATVCGPKKSTNLVKNKCVNFNFNGLT(

3STPCNGVEGFNCYFPLQSYGFQPTNGVGYQPYRVVVLSFELLHAPATVCGPKKSTNLVKNKCVNFNFNGLT(

3STPCNGVEGFNCYFPLQSYGFQPTNGVGYQPYRVVVLSFELLHAPATVCGPKKSTNLVKNKCVNFNFNGLT(

3STPCNGVEGFNCYFPLQSYGFQPTNGVGYQPYRVVLSFELLHAPATVCGPKKSTNLVKNKCVNFFNGLT





GTGVLTESNKKFLPFQQFGRDIADTTDAVRDPQTLEILDITPCSFGGVSVITPGTNTSNQVAVLYQDVNCTEVP

GTGVLTESNKKFLPFQQFGRDIADTTDAVRDPQTLEILDITPCSFGGVSVITPGTNTSNQVAVLYQDVNCTEVP

GTGVLTESNKKFLPFQQFGRDIADTTDAVRDPQTLEILDITPCSFGGVSVITPGTNTSNQVAVLYQDVNCTEVP

GTGVLTESNKKFLPFQQFGRDIADTTDAVRDPQTLEILDITPCSFGGVSVITPGTNTSNQVAVLYQDVNCTEVP

GTGVLTESNKKFLPFQQFGRDIADTTDAVRDPQTLEILDITPCSFGGVSVITPGTNTSNQVAVLYQDVNCTEVP

GTGVLTESNKKFLPFQQFGRDIADTTDAVRDPQLEILDITPCSFGGVSVITPGTNTSNQVAVLYQDVNCTEVP



'VAIHADQLTPTWRVYSTGSNVFQTRAGCLIGAEHVNNSYECDIPIGAGICASYQTQTNSPRRARSVASQSIIA\

'VAIHADQLTPTWRVYSTGSNVFQTRAGCLIGAEHVNNSYECDIPIGAGICASYQTQTNSPRRARSVASQSIIA\

'VAIHADQLTPTWRVYSTGSNVFQTRAGCLIGAEHVNNSYECDIPIGAGICASYQTQTNSPRRARSVASQSIIA\

'VAIHADQLTPTWRVYSTGSNVFQTRAGCLIGAEHVNNSYECDIPIGAGICASYQTQTNSPRRARSVASQSIIA\

'VAIHADQLTPTWRVYSTGSNVFQTRAGCLIGAEHVNNSYECDIPIGAGICASYQTQTNSPRRARSVASQSIIA\

'VAIHADQLTPTWRVYSTGSNVFQTRAGCLIGAEHVNNSYECDIPIGAGICASYQTQTNSPRRARSVASQSIIA\



YTMSLGAENSVAYSNNSIAIPTNFTISVTTEILPVSMKTSVDCTMYICGDSTECSNLLLQYGSFCTQLNRALTGI

YTMSLGAENSVAYSNNSIAIPTNFTISVTTEILPVSMKTSVDCTMYICGDSTECSNLLLQYGSFCTQLNRALTGI

YTMSLGAENSVAYSNNSIAIPTNFTISVTTEILPVSMKTSVDCTMYICGDSTECSNLLLQYGSFCTQLNRALTGI

YTMSLGAENSVAYSNNSIAIPTNFTISVTTEILPVSMKTSVDCTMYICGDSTECSNLLLQYGSFCTQLNRALTGI

YTMSLGAENSVAYSNNSIAIPTNFTISVTTEILPVSMKTSVDCTMYICGDSTECSNLLLQYGSFCTQLNRALTGI

YTMSLGAENSVAYSNNSIAIPTNFTISVTTEILPVSMTKTSVDCTMYICGDSTECNLLLQYGSFCTQLNRALTGI





IAVEQDKNTQEVFAQVKQIYKTPPIKDFGGFNFSQILPDPSKPSKRSFIEDLLFNKVTLADAGFIKQYGDCLGDI/

IAVEQDKNTQEVFAQVKQIYKTPPIKDFGGFNFSQILPDPSKPSKRSFIEDLLFNKVTLADAGFIKQYGDCLGDI/

IAVEQDKNTQEVFAQVKQIYKTPPIKDFGGFNFSQILPDPSKPSKRSFIEDLLFNKVTLADAGFIKQYGDCLGDI/

IAVEQDKNTQEVFAQVKQIYKTPPIKDFGGFNFSQILPDPSKPSKRSFIEDLLFNKVTLADAGFIKQYGDCLGDI/

IAVEQDKNTQEVFAQVKQIYKTPPIKDFGGFNFSQILPDPSKPSKRSFIEDLLFNKVTLADAGFIKQYGDCLGDI/

I AVEQDKNTQE VFAQVKQIYKTPPIKDFGGFNFSQILPDPSKPSKRSFIEDLLFNKVTLADAGFIKQYGDCLGDI A



\ARDLICAQKFNGLTVLPPLLTDEMIAQYTSALLAGTITSGWTFGAGAALQIPFAMQMAYRFNGIGVTQNVLY

\ARDLICAQKFNGLTVLPPLLTDEMIAQYTSALLAGTITSGWTFGAGAALQIPFAMQMAYRFNGIGVTQNVLY

\ARDLICAQKFNGLTVLPPLLTDEMIAQYTSALLAGTITSGWTFGAGAALQIPFAMQMAYRFNGIGVTQNVLY

\ARDLICAQKFNGLTVLPPLLTDEMIAQYTSALLAGTITSGWTFGAGAALQIPFAMQMAYRFNGIGVTQNVLY

\ARDLICAQKFNGLTVLPPLLTDEMIAQYTSALLAGTITSGWTFGAGAALQIPFAMQMAYRFNGIGVTQNVLY

\ARDLICAQKFNGLTVLPPLLTDEMIAQYTSALLAGTITSGWTFGAGAALQIPFAMQMAYRFNGIGVTQNVLY



YENQKLIANQFNSAIGKIQDLSSTASALGKLQDVVNQNAQALNTLVKQLSSNFGAISSVLNDILSRDKVEAEV

YENQKLIANQFNSAIGKIQDLSSTASALGKLQDVVNQNAQALNTLVKQLSSNFGAISSVLNDILSRDKVEAEV

YENQKLIANQFNSAIGKIQDLSSTASALGKLQDVVNQNAQALNTLVKQLSSNFGAISSVLNDILSRDKVEAEV

YENQKLIANQFNSAIGKIQDLSSTASALGKLQDVVNQNAQALNTLVKQLSSNFGAISSVLNDILSRDKVEAEV

YENQKLIANQFNSAIGKIQDLSSTASALGKLQDVVNQNAQALNTLVKQLSSNFGAISSVLNDILSRDKVEAEV



(ENQKLIANQFNSAIGKIQDLSSTASALGKLQDVVNQNAQALNTLVKQLSSNFGAISSVLNDILSRDKVEAEV



/QIDRLITGRLQSLQTYVTQQLIRAAEIRASANL

/QIDRLITGRLQSLQTYVTQQLIRAAEIRASANL

/QIDRLITGRLQSLQTYVTQQLIRAAEIRASANL

/QIDRLITGRLQSLQTYVTQQLIRAAEIRASANL

/QIDRLITGRLQSLQTYVTQQLIRAAEIRASANL

/QIDRLITGRLQSLQTYVTQQLIRAAEIRASANL

|         | subgenome | peak_leader_peak_TRS_start | ACGAAC | ATG_position | 20_leader_sequence |
|---------|-----------|----------------------------|--------|--------------|--------------------|
| S1-Day1 | ORF3a     | 69                         | 25385  | yes          | 25393 CTTGTAGATC   |
|         | M         | 65                         | 26469  | yes          | 26523 ATCTCTTGTA   |
|         | ORF8      | 65                         | 27884  | yes          | 27894 ATCTCTTGTA   |
|         | N         | 65                         | 28256  | yes          | 28274 ATCTCTTGTA   |
|         | S         | 65                         | 21552  | yes          | 21563 ATCTCTTGTA   |
| S2-Day2 | ORF3a     | 69                         | 25385  | yes          | 25393 CTTGTAGATC   |
|         | E         | 69                         | 26237  | yes          | 26245 CTTGTAGATC   |
|         | M         | 65                         | 26469  | yes          | 26523 ATCTCTTGTA   |
|         | ORF6      | 69                         | 27041  | yes          | 27202 CTTGTAGATC   |
|         | ORF7a     | 69                         | 27388  | yes          | 27394 CTTGTAGATC   |
|         | ORF7b     | 65                         | 27644  | no           | 27756 ATCTCTTGTA   |
|         | ORF8      | 65                         | 27884  | yes          | 27894 ATCTCTTGTA   |
| S3-Day3 | N         | 64                         | 28255  | yes          | 28274 GATCTCTTGT   |
|         | ORF3a     | 69                         | 25385  | yes          | 25393 CTTGTAGATC   |
|         | M         | 65                         | 26469  | yes          | 26523 ATCTCTTGTA   |
|         | ORF7a     | 69                         | 27388  | yes          | 27394 CTTGTAGATC   |
|         | ORF8      | 65                         | 27884  | yes          | 27894 ATCTCTTGTA   |
|         | N         | 64                         | 28255  | yes          | 28274 GATCTCTTGT   |
|         | ORF3a     | 69                         | 25385  | yes          | 25393 CTTGTAGATC   |
| S1-Day4 | E         | 69                         | 26237  | yes          | 26245 CTTGTAGATC   |
|         | M         | 65                         | 26469  | yes          | 26523 ATCTCTTGTA   |
|         | ORF7a     | 69                         | 27388  | yes          | 27394 CTTGTAGATC   |
|         | N         | 64                         | 28255  | yes          | 28274 GATCTCTTGT   |
|         | S         | 65                         | 21552  | yes          | 21563 ATCTCTTGTA   |
| S2-Day5 | ORF3a     | 69                         | 25385  | yes          | 25393 CTTGTAGATC   |
|         | E         | 69                         | 26237  | yes          | 26245 CTTGTAGATC   |
|         | M         | 64                         | 26468  | yes          | 26523 GATCTCTTGT   |
|         | ORF6      | 69                         | 27041  | yes          | 27202 CTTGTAGATC   |
|         | ORF7a     | 69                         | 27388  | yes          | 27394 CTTGTAGATC   |
|         | ORF7b     | 65                         | 27644  | no           | 27756 ATCTCTTGTA   |
|         | ORF8      | 65                         | 27884  | yes          | 27894 ATCTCTTGTA   |
| S3-Day6 | N         | 64                         | 28255  | yes          | 28274 GATCTCTTGT   |
|         | ORF3a     | 69                         | 25385  | yes          | 25393 CTTGTAGATC   |
|         | E         | 69                         | 26237  | yes          | 26245 CTTGTAGATC   |
|         | M         | 65                         | 26469  | yes          | 26523 ATCTCTTGTA   |
|         | ORF6      | 69                         | 27041  | yes          | 27202 CTTGTAGATC   |
|         | ORF7a     | 69                         | 27388  | yes          | 27394 CTTGTAGATC   |
|         | N         | 64                         | 28255  | yes          | 28274 GATCTCTTGT   |
| S2-Day8 | S         | 65                         | 21552  | yes          | 21563 ATCTCTTGTA   |
|         | ORF3a     | 69                         | 25385  | yes          | 25393 CTTGTAGATC   |
|         | E         | 69                         | 26237  | yes          | 26245 CTTGTAGATC   |
|         | M         | 64                         | 26468  | yes          | 26523 GATCTCTTGT   |

|          |       |    |       |     |       |            |
|----------|-------|----|-------|-----|-------|------------|
| S2-Day0  | ORF6  | 69 | 27041 | yes | 27202 | CTTGTAGATC |
|          | ORF7a | 69 | 27388 | yes | 27394 | CTTGTAGATC |
|          | ORF8  | 65 | 27884 | yes | 27894 | ATCTCTTGTA |
|          | N     | 64 | 28255 | yes | 28274 | GATCTCTTGT |
| S3-Day9  | ORF3a | 69 | 25385 | yes | 25393 | CTTGTAGATC |
|          | N     | 65 | 28256 | yes | 28274 | ATCTCTTGTA |
| S2-Day11 | N     | 65 | 28256 | yes | 28274 | ATCTCTTGTA |
| S3-Day12 | N     | 65 | 28256 | yes | 28274 | ATCTCTTGTA |
| S3-Day14 | ORF6  | 69 | 27041 | yes | 27202 | CTTGTAGATC |
|          | N     | 65 | 28256 | yes | 28274 | ATCTCTTGTA |

“peak\_leader” and “peak\_TRS\_start” point to the leader-TRS junctions in sheet "known", “ACG/

TRS\_seq first\_orf\_aa  
ACGAACTT MDLFMRIFTIGTVTLKQGEIKDATPSDFVRATATIPIQASLPFGWLIVGVALLAVFQSASKIITLI  
CTAAACGAAC MADSNGTITVEELKKLLEQWNLVIGFLFTWICLLQFAYANRNRFLYIIKLIFLWLLWPVTLACI  
CTAAACGAAC MKFLVFLGIITTVAAFHQECSLQSQCTQHQPYYVDDPCPIHFYSKWYIRVGARKSAPLIELCVDE  
CTAAACGAAC MSDNGPQNQRNAPRITFGGSPDSTGNSQNGERSGARSKQRRPQGLPNNTASWFTALTQF  
CTAAACGAAC MFVFLVLLPLVSSQCVNLTRTQLPPAYTNSFTRGVYYPDKVFRSSVLHSTQDLFLPFFSNVTV  
ACGAACTT MDLFMRIFTIGTVTLKQGEIKDATPSDFVRATATIPIQASLPFGWLIVGVALLAVFQSASKIITLI  
ACGAACTT MYSFVSEETGLIVNSVLLFLAFVVFLVTLAILTALRLCAYCCNIVNVSLVKPSFYVYSRVKLN  
CTAAACGAAC MADSNGTITVEELKKLLEQWNLVIGFLFTWICLLQFAYANRNRFLYIIKLIFLWLLWPVTLACI  
ACGAACTT MFHLVDFQVTIAEILLIIMRTFKVSIWNLDYIINLIKNLSKSLTENKYSQLDEEQPMEID\*  
ACGAAC MKIILFLALITLATCELYHYQECVRGTTVLLKEPCSSGTYEGNSPFHPLADNKFALTCFSTQFAF/  
CTAAACTGTT MIELSLIDFYLCFLAFLLFLVLIIMLIIFWFSLELQDHNETCHA\*  
CTAAACGAAC MKFLVFLGIITTVAAFHQECSLQSQCTQHQPYYVDDPCPIHFYSKWYIRVGARKSAPLIELCVDE  
TCTAAACGAAC MSDNGPQNQRNAPRITFGGSPDSTGNSQNGERSGARSKQRRPQGLPNNTASWFTALTQF  
ACGAACTT MDLFMRIFTIGTVTLKQGEIKDATPSDFVRATATIPIQASLPFGWLIVGVALLAVFQSASKIITLI  
CTAAACGAAC MADSNGTITVEELKKLLEQWNLVIGFLFTWICLLQFAYANRNRFLYIIKLIFLWLLWPVTLACI  
ACGAAC MKIILFLALITLATCELYHYQECVRGTTVLLKEPCSSGTYEGNSPFHPLADNKFALTCFSTQFAF/  
CTAAACGAAC MKFLVFLGIITTVAAFHQECSLQSQCTQHQPYYVDDPCPIHFYSKWYIRVGARKSAPLIELCVDE  
TCTAAACGAAC MSDNGPQNQRNAPRITFGGSPDSTGNSQNGERSGARSKQRRPQGLPNNTASWFTALTQF  
ACGAACTT MDLFMRIFTIGTVTLKQGEIKDATPSDFVRATATIPIQASLPFGWLIVGVALLAVFQSASKIITLI  
ACGAACTT MYSFVSEETGLIVNSVLLFLAFVVFLVTLAILTALRLCAYCCNIVNVSLVKPSFYVYSRVKLN  
CTAAACGAAC MADSNGTITVEELKKLLEQWNLVIGFLFTWICLLQFAYANRNRFLYIIKLIFLWLLWPVTLACI  
ACGAAC MKIILFLALITLATCELYHYQECVRGTTVLLKEPCSSGTYEGNSPFHPLADNKFALTCFSTQFAF/  
TCTAAACGAAC MSDNGPQNQRNAPRITFGGSPDSTGNSQNGERSGARSKQRRPQGLPNNTASWFTALTQF  
CTAAACGAAC MFVFLVLLPLVSSQCVNLTRTQLPPAYTNSFTRGVYYPDKVFRSSVLHSTQDLFLPFFSNVTV  
ACGAACTT MDLFMRIFTIGTVTLKQGEIKDATPSDFVRATATIPIQASLPFGWLIVGVALLAVFQSASKIITLI  
ACGAACTT MYSFVSEETGLIVNSVLLFLAFVVFLVTLAILTALRLCAYCCNIVNVSLVKPSFYVYSRVKLN  
TCTAAACGAAC MADSNGTITVEELKKLLEQWNLVIGFLFTWICLLQFAYANRNRFLYIIKLIFLWLLWPVTLACI  
ACGAACTT MFHLVDFQVTIAEILLIIMRTFKVSIWNLDYIINLIKNLSKSLTENKYSQLDEEQPMEID\*  
ACGAAC MKIILFLALITLATCELYHYQECVRGTTVLLKEPCSSGTYEGNSPFHPLADNKFALTCFSTQFAF/  
CTAAACTGTT MIELSLIDFYLCFLAFLLFLVLIIMLIIFWFSLELQDHNETCHA\*  
CTAAACGAAC MKFLVFLGIITTVAAFHQECSLQSQCTQHQPYYVDDPCPIHFYSKWYIRVGARKSAPLIELCVDE  
TCTAAACGAAC MSDNGPQNQRNAPRITFGGSPDSTGNSQNGERSGARSKQRRPQGLPNNTASWFTALTQF  
ACGAACTT MDLFMRIFTIGTVTLKQGEIKDATPSDFVRATATIPIQASLPFGWLIVGVALLAVFQSASKIITLI  
ACGAACTT MYSFVSEETGLIVNSVLLFLAFVVFLVTLAILTALRLCAYCCNIVNVSLVKPSFYVYSRVKLN  
CTAAACGAAC MADSNGTITVEELKKLLEQWNLVIGFLFTWICLLQFAYANRNRFLYIIKLIFLWLLWPVTLACI  
ACGAACTT MFHLVDFQVTIAEILLIIMRTFKVSIWNLDYIINLIKNLSKSLTENKYSQLDEEQPMEID\*  
ACGAAC MKIILFLALITLATCELYHYQECVRGTTVLLKEPCSSGTYEGNSPFHPLADNKFALTCFSTQFAF/  
TCTAAACGAAC MSDNGPQNQRNAPRITFGGSPDSTGNSQNGERSGARSKQRRPQGLPNNTASWFTALTQF  
CTAAACGAAC MFVFLVLLPLVSSQCVNLTRTQLPPAYTNSFTRGVYYPDKVFRSSVLHSTQDLFLPFFSNVTV  
ACGAACTT MDLFMRIFTIGTVTLKQGEIKDATPSDFVRATATIPIQASLPFGWLIVGVALLAVFQSASKIITLI  
ACGAACTT MYSFVSEETGLIVNSVLLFLAFVVFLVTLAILTALRLCAYCCNIVNVSLVKPSFYVYSRVKLN  
TCTAAACGAAC MADSNGTITVEELKKLLEQWNLVIGFLFTWICLLQFAYANRNRFLYIIKLIFLWLLWPVTLACI

ACGAACGCTT MFHLVDFQVTIAEILLIIMRTFKVSIWNLDYIINLIKNLSKSLTENKYSQLDEEQPMEID\*  
ACGAAC MKIILFLALITLATCELYHYQECVRGTTVLLKEPCSSGTYEGNSPFHPLADNKFALTCFSTQFAF/  
CTAAACGAAC MKFLVFLGIITTVAAFHQECSLQSQCTQHQPYYVDDPCPIHFYSKWYIRVGARKSAPLIELCVDE  
TCTAAACGAAC MSDNGPQNQRNAPRITFGG PSDSTG SNQNGERSG ARSKQRRPQGLPNNTASWFTALTQF  
ACGAAC TT MDLFMRIFTIGTVTLKQGEIKDATPSDFVRATATIPIQASLPFGWLIVGVALLAVFQSASKIITLI  
CTAAACGAAC MSDNGPQNQRNAPRITFGG PSDSTG SNQNGERSG ARSKQRRPQGLPNNTASWFTALTQF  
CTAAACGAAC MSDNGPQNQRNAPRITFGG PSDSTG SNQNGERSG ARSKQRRPQGLPNNTASWFTALTQF  
CTAAACGAAC MSDNGPQNQRNAPRITFGG PSDSTG SNQNGERSG ARSKQRRPQGLPNNTASWFTALTQF  
ACGAACGCTT MFHLVDFQVTIAEILLIIMRTFKVSIWNLDYIINLIKNLSKSLTENKYSQLDEEQPMEID\*  
CTAAACGAAC MSDNGPQNQRNAPRITFGG PSDSTG SNQNGERSG ARSKQRRPQGLPNNTASWFTALTQF  
AAC" indicates if there is a ACGAAC sequence in the "TRS\_seq" (TRS sequences), "20\_leader\_seq



KKRWQLALSkgVhFvcNllllFvtVyShlllVaaGLEapFLyLYalVyFLQsInFvRIIMRLwLcWkCRsKNpLL  
FVlaAVyRINWITGGIAIAMAclVGLMwLSyFIASfRLfARTRSMwSfNPETNILLNVPLHGtILTRPllESELV  
EAGSKSPIQYIDIGNYTVSCLPFTINCQEPKLGSLVVRCSFYEDFLEYHDVRVVLDFI\*  
IGKEDLKFPRGQGVpINTnSSpDDQIGYyRRATRRIRGGDGKMKDLSPRWYFYyLGTGPEAGLPYGANKDGII  
MFHAIHVSGTNGTKRFDNPVLPFNDGVYFASTEKSNIIRGWIFGTTLDskTQsLLIVNNATNVVikVCEfQFCNI  
KKRWQLALSkgVhFvcNllllFvtVyShlllVaaGLEapFLyLYalVyFLQsInFvRIIMRLwLcWkCRsKNpLL  
ISSRVPDLLV\*

ACPDGVKHVYQLRARSVSPKLFIRQEEVQELYSPiFLIVAAIVFiTLCFTLKRKTE\*

EAGSKSPIQYIDIGNYTVSCLPFTINCQEPKLGSLVVRCSFYEDFLEYHDVRVVLDFI\*  
IGKEDLKFPRGQGVpINTnSSpDDQIGYyRRATRRIRGGDGKMKDLSPRWYFYyLGTGPEAGLPYGANKDGII  
KKRWQLALSkgVhFvcNllllFvtVyShlllVaaGLEapFLyLYalVyFLQsInFvRIIMRLwLcWkCRsKNpLL  
FVlaAVyRINWITGGIAIAMAclVGLMwLSyFIASfRLfARTRSMwSfNPETNILLNVPLHGtILTRPllESELV  
ACPDGVKHVYQLRARSVSPKLFIRQEEVQELYSPiFLIVAAIVFiTLCFTLKRKTE\*

EAGSKSPIQYIDIGNYTVSCLPFTINCQEPKLGSLVVRCSFYEDFLEYHDVRVVLDFI\*  
IGKEDLKFPRGQGVpINTnSSpDDQIGYyRRATRRIRGGDGKMKDLSPRWYFYyLGTGPEAGLPYGANKDGII  
KKRWQLALSkgVhFvcNllllFvtVyShlllVaaGLEapFLyLYalVyFLQsInFvRIIMRLwLcWkCRsKNpLL  
ISSRVPDLLV\*

FVlaAVyRINWITGGIAIAMAclVGLMwLSyFIASfRLfARTRSMwSfNPETNILLNVPLHGtILTRPllESELV  
ACPDGVKHVYQLRARSVSPKLFIRQEEVQELYSPiFLIVAAIVFiTLCFTLKRKTE\*

IGKEDLKFPRGQGVpINTnSSpDDQIGYyRRATRRIRGGDGKMKDLSPRWYFYyLGTGPEAGLPYGANKDGII  
MFHAIHVSGTNGTKRFDNPVLPFNDGVYFASTEKSNIIRGWIFGTTLDskTQsLLIVNNATNVVikVCEfQFCNI  
KKRWQLALSkgVhFvcNllllFvtVyShlllVaaGLEapFLyLYalVyFLQsInFvRIIMRLwLcWkCRsKNpLL  
ISSRVPDLLV\*

FVlaAVyRINWITGGIAIAMAclVGLMwLSyFIASfRLfARTRSMwSfNPETNILLNVPLHGtILTRPllESELV

ACPDGVKHVYQLRARSVSPKLFIRQEEVQELYSPiFLIVAAIVFiTLCFTLKRKTE\*

EAGSKSPIQYIDIGNYTVSCLPFTINCQEPKLGSLVVRCSFYEDFLEYHDVRVVLDFI\*  
IGKEDLKFPRGQGVpINTnSSpDDQIGYyRRATRRIRGGDGKMKDLSPRWYFYyLGTGPEAGLPYGANKDGII  
KKRWQLALSkgVhFvcNllllFvtVyShlllVaaGLEapFLyLYalVyFLQsInFvRIIMRLwLcWkCRsKNpLL  
ISSRVPDLLV\*

FVlaAVyRINWITGGIAIAMAclVGLMwLSyFIASfRLfARTRSMwSfNPETNILLNVPLHGtILTRPllESELV

ACPDGVKHVYQLRARSVSPKLFIRQEEVQELYSPiFLIVAAIVFiTLCFTLKRKTE\*

IGKEDLKFPRGQGVpINTnSSpDDQIGYyRRATRRIRGGDGKMKDLSPRWYFYyLGTGPEAGLPYGANKDGII  
MFHAIHVSGTNGTKRFDNPVLPFNDGVYFASTEKSNIIRGWIFGTTLDskTQsLLIVNNATNVVikVCEfQFCNI  
KKRWQLALSkgVhFvcNllllFvtVyShlllVaaGLEapFLyLYalVyFLQsInFvRIIMRLwLcWkCRsKNpLL  
ISSRVPDLLV\*

FVlaAVyRINWITGGIAIAMAclVGLMwLSyFIASfRLfARTRSMwSfNPETNILLNVPLHGtILTRPllESELV

ACPDGVKHHVYQLRARSVSPKLFIRQEEVQELYSPIFLIVAAIVFITLCFTLKRKTE\*  
EAGSKSPIQYIDIGNYTVSCLPFTINCQEPKLGSLVVRCsfyedfLEYHDVRVVLDFI\*  
HGKEDLKFPRGQGVPIINTNSSPDDQIGYYRRATRRIRGGDGKMKDLSRWYFYLLGTGPEAGLPYGANKDGII  
KKRWQLALSkgvhfvcnllllfvTVYSHLLLVAAGLEAPFLYLYALVYFLQsINFVRIIMRLWLCWKCRSKNPLL  
HGKEDLKFPRGQGVPIINTNSSPDDQIGYYRRATRRIRGGDGKMKDLSRWYFYLLGTGPEAGLPYGANKDGII  
HGKEDLKFPRGQGVPIINTNSSPDDQIGYYRRATRRIRGGDGKMKDLSRWYFYLLGTGPEAGLPYGANKDGII  
HGKEDLKFPRGQGVPIINTNSSPDDQIGYYRRATRRIRGGDGKMKDLSRWYFYLLGTGPEAGLPYGANKDGII  
q" refers to the 20 nucleotides before the end of leader, and "AUG\_postion" and "first\_orf\_aa"

.YDANYFLCWHTNCYDYCIPYNSVTSSIVITSGDGTTSPISEHDYQIGGYTEKWESGVKDCVVLHSYFTSDYYQL'  
IGAVILRGHLRIAGHHLGRCDIKDLPKEITVATSRTLSYYKLGASQRVAGDSGFAAYSRYRIGNYKLNTDHSSSSE

IWVATEGALNTPKDHIGTRNPANNAIIVLQLPQGTTLPKGFYAEGSRGGSQASSRSSSRNSSRNSTPGSSR  
DPFLGVYYHKNNKSWMESEFRVYSSANNCTFEYVSQPFLMDLEGKQGNFKNLREFVFKNIDGYFKIYSKHTPI  
.YDANYFLCWHTNCYDYCIPYNSVTSSIVITSGDGTTSPISEHDYQIGGYTEKWESGVKDCVVLHSYFTSDYYQL'

IGAVILRGHLRIAGHHLGRCDIKDLPKEITVATSRTLSYYKLGASQRVAGDSGFAAYSRYRIGNYKLNTDHSSSSE

IWVATEGALNTPKDHIGTRNPANNAIIVLQLPQGTTLPKGFYAEGSRGGSQASSRSSSRNSSRNSTPGSSR  
.YDANYFLCWHTNCYDYCIPYNSVTSSIVITSGDGTTSPISEHDYQIGGYTEKWESGVKDCVVLHSYFTSDYYQL'  
IGAVILRGHLRIAGHHLGRCDIKDLPKEITVATSRTLSYYKLGASQRVAGDSGFAAYSRYRIGNYKLNTDHSSSSE

IWVATEGALNTPKDHIGTRNPANNAIIVLQLPQGTTLPKGFYAEGSRGGSQASSRSSSRNSSRNSTPGSSR  
.YDANYFLCWHTNCYDYCIPYNSVTSSIVITSGDGTTSPISEHDYQIGGYTEKWESGVKDCVVLHSYFTSDYYQL'

IGAVILRGHLRIAGHHLGRCDIKDLPKEITVATSRTLSYYKLGASQRVAGDSGFAAYSRYRIGNYKLNTDHSSSSE

IWVATEGALNTPKDHIGTRNPANNAIIVLQLPQGTTLPKGFYAEGSRGGSQASSRSSSRNSSRNSTPGSSR  
DPFLGVYYHKNNKSWMESEFRVYSSANNCTFEYVSQPFLMDLEGKQGNFKNLREFVFKNIDGYFKIYSKHTPI  
.YDANYFLCWHTNCYDYCIPYNSVTSSIVITSGDGTTSPISEHDYQIGGYTEKWESGVKDCVVLHSYFTSDYYQL'

IGAVILRGHLRIAGHHLGRCDIKDLPKEITVATSRTLSYYKLGASQRVAGDSGFAAYSRYRIGNYKLNTDHSSSSE

IWVATEGALNTPKDHIGTRNPANNAIIVLQLPQGTTLPKGFYAEGSRGGSQASSRSSSRNSSRNSTPGSSR  
.YDANYFLCWHTNCYDYCIPYNSVTSSIVITSGDGTTSPISEHDYQIGGYTEKWESGVKDCVVLHSYFTSDYYQL'

IGAVILRGHLRIAGHHLGRCDIKDLPKEITVATSRTLSYYKLGASQRVAGDSGFAAYSRYRIGNYKLNTDHSSSSE

IWVATEGALNTPKDHIGTRNPANNAIIVLQLPQGTTLPKGFYAEGSRGGSQASSRSSSRNSSRNSTPGSSR  
DPFLGVYYHKNNKSWMESEFRVYSSANNCTFEYVSQPFLMDLEGKQGNFKNLREFVFKNIDGYFKIYSKHTPI  
.YDANYFLCWHTNCYDYCIPYNSVTSSIVITSGDGTTSPISEHDYQIGGYTEKWESGVKDCVVLHSYFTSDYYQL'

IGAVILRGHLRIAGHHLGRCDIKDLPKEITVATSRTLSYYKLGASQRVAGDSGFAAYSRYRIGNYKLNTDHSSSSE

IWVATEGALNTPKDHIGTRNPANNAIVLQLPQGTTLPKGFYAEGSRGGSQASSRSSSRNSSRNSTPGSSR  
.YDANYFLCWHTNCYDYCIPYNSVTSSIVITSGDGTTSPISEHDYQIGGYTEKWESGVKDCVVLHSYFTSDYYQL'  
IWVATEGALNTPKDHIGTRNPANNAIVLQLPQGTTLPKGFYAEGSRGGSQASSRSSSRNSSRNSTPGSSR  
IWVATEGALNTPKDHIGTRNPANNAIVLQLPQGTTLPKGFYAEGSRGGSQASSRSSSRNSSRNSTPGSSR  
IWVATEGALNTPKDHIGTRNPANNAIVLQLPQGTTLPKGFYAEGSRGGSQASSRSSSRNSSRNSTPGSSR

IWVATEGALNTPKDHIGTRNPANNAIVLQLPQGTTLPKGFYAEGSRGGSQASSRSSSRNSSRNSTPGSSR  
refer to the first AUG position and translated orf of the sgmRNA.

YSTQLSTDTGVEHVTFEYFNKIVDEPEEHVQIHTIDGSSGVVNPVMEPIYDEPTTTTTSVPL\*  
DNIALLVQ\*

GTSPARMAGNGGDAALALLLDRLNQLESKMSGKGQQQGGQTVTKKSAAEASKKPRQKRTATKAYNVTQ/  
|NLVRDLPQGFSALEPLVDLPIGINITRFQTLALHRSYLTGDSGGWTAGAAAYVGYLQPRTFLLKYNENGTI  
YSTQLSTDTGVEHVTFEYFNKIVDEPEEHVQIHTIDGSSGVVNPVMEPIYDEPTTTTTSVPL\*

DNIALLVQ\*

GTSPARMAGNGGDAALALLLDRLNQLESKMSGKGQQQGGQTVTKKSAAEASKKPRQKRTATKAYNVTQ/  
YSTQLSTDTGVEHVTFEYFNKIVDEPEEHVQIHTIDGSSGVVNPVMEPIYDEPTTTTTSVPL\*  
DNIALLVQ\*

GTSPARMAGNGGDAALALLLDRLNQLESKMSGKGQQQGGQTVTKKSAAEASKKPRQKRTATKAYNVTQ/  
YSTQLSTDTGVEHVTFEYFNKIVDEPEEHVQIHTIDGSSGVVNPVMEPIYDEPTTTTTSVPL\*

DNIALLVQ\*

GTSPARMAGNGGDAALALLLDRLNQLESKMSGKGQQQGGQTVTKKSAAEASKKPRQKRTATKAYNVTQ/  
|NLVRDLPQGFSALEPLVDLPIGINITRFQTLALHRSYLTGDSGGWTAGAAAYVGYLQPRTFLLKYNENGTI  
YSTQLSTDTGVEHVTFEYFNKIVDEPEEHVQIHTIDGSSGVVNPVMEPIYDEPTTTTTSVPL\*

DNIALLVQ\*

GTSPARMAGNGGDAALALLLDRLNQLESKMSGKGQQQGGQTVTKKSAAEASKKPRQKRTATKAYNVTQ/  
YSTQLSTDTGVEHVTFEYFNKIVDEPEEHVQIHTIDGSSGVVNPVMEPIYDEPTTTTTSVPL\*

DNIALLVQ\*

GTSPARMAGNGGDAALALLLDRLNQLESKMSGKGQQQGGQTVTKKSAAEASKKPRQKRTATKAYNVTQ/  
|NLVRDLPQGFSALEPLVDLPIGINITRFQTLALHRSYLTGDSGGWTAGAAAYVGYLQPRTFLLKYNENGTI  
YSTQLSTDTGVEHVTFEYFNKIVDEPEEHVQIHTIDGSSGVVNPVMEPIYDEPTTTTTSVPL\*

DNIALLVQ\*

GTSPARMAGNGGDAALALLLDRLNQLESKMSGKGQQQGGQTVTKSAAEASKKPRQKRTATKAYNVTQ/  
YSTQLSTDTGVEHVTFEYFNKIVDEPEEHVQIHTIDGSSGVVNPVMEPIYDEPTTTTTSVPL\*

GTSPARMAGNGGDAALALLLDRLNQLESKMSGKGQQQGGQTVTKSAAEASKKPRQKRTATKAYNVTQ/

GTSPARMAGNGGDAALALLLDRLNQLESKMSGKGQQQGGQTVTKSAAEASKKPRQKRTATKAYNVTQ/

GTSPARMAGNGGDAALALLLDRLNQLESKMSGKGQQQGGQTVTKSAAEASKKPRQKRTATKAYNVTQ/

GTSPARMAGNGGDAALALLLDRLNQLESKMSGKGQQQGGQTVTKSAAEASKKPRQKRTATKAYNVTQ/

AFGRRGPEQTQGNFGDQELIRQGTDYKHWPQIAQFAPSASAFFGMSRIGMEVTPSGTWLTYTGAIKLDDKD  
ITDAVDCALDPLSETKCTLKSFTVEKGIYQTSNFRVQPTESIVRFPNITNLCPFGEVFNATRFASVYAWNRKRIS

AFGRRGPEQTQGNFGDQELIRQGTDYKHWPQIAQFAPSASAFFGMSRIGMEVTPSGTWLTYTGAIKLDDKD

AFGRRGPEQTQGNFGDQELIRQGTDYKHWPQIAQFAPSASAFFGMSRIGMEVTPSGTWLTYTGAIKLDDKD

AFGRRGPEQTQGNFGDQELIRQGTDYKHWPQIAQFAPSASAFFGMSRIGMEVTPSGTWLTYTGAIKLDDKD  
ITDAVDCALDPLSETKCTLKSFTVEKGIYQTSNFRVQPTESIVRFPNITNLCPFGEVFNATRFASVYAWNRKRIS

AFGRRGPEQTQGNFGDQELIRQGTDYKHWPQIAQFAPSASAFFGMSRIGMEVTPSGTWLTYTGAIKLDDKD

AFGRRGPEQTQGNFGDQELIRQGTDYKHWPQIAQFAPSASAFFGMSRIGMEVTPSGTWLTYTGAIKLDDKD  
ITDAVDCALDPLSETKCTLKSFTVEKGIYQTSNFRVQPTESIVRFPNITNLCPFGEVFNATRFASVYAWNRKRIS

AFGRRGPEQTQGNFGDQELIRQGTDYKHWPQIAQFAPSASAFFGMSRIGMEVTPSGTWLTYTGAIKLDDKD

AFGRRGPEQTQGNFGDQELIRQGTDYKHWPQIAQFAPSASAFFGMSRIGMEVTPSGTWLTYTGAIKLDDKD

AFGRRGPEQTQGNFGDQELIRQGTDYKHWPQIAQFAPSASAFFGMSRIGMEVTPSGTWLTYTGAIKLDDKD

AFGRRGPEQTQGNFGDQELIRQGTDYKHWPQIAQFAPSASAFFGMSRIGMEVTPSGTWLTYTGAIKLDDKD

AFGRRGPEQTQGNFGDQELIRQGTDYKHWPQIAQFAPSASAFFGMSRIGMEVTPSGTWLTYTGAIKLDDKD



PNFKDQVILLNKHIDAYKTFPPTPEPKDKKKKKADETQALPQRQKKQQTVTLLPAADLDDFSKQLQQSMSSAD  
VCVADYSVLYNSASFSTFKCYGVSPKLNLCFTNVYADSFVIRGDEVQRQIAPGQTGKIADYNYKLPDDFTGCV

PNFKDQVILLNKHIDAYKTFPPTPEPKDKKKKKADETQALPQRQKKQQTVTLLPAADLDDFSKQLQQSMSSAD

PNFKDQVILLNKHIDAYKTFPPTPEPKDKKKKKADETQALPQRQKKQQTVTLLPAADLDDFSKQLQQSMSSAD

PNFKDQVILLNKHIDAYKTFPPTPEPKDKKKKKADETQALPQRQKKQQTVTLLPAADLDDFSKQLQQSMSSAD  
VCVADYSVLYNSASFSTFKCYGVSPKLNLCFTNVYADSFVIRGDEVQRQIAPGQTGKIADYNYKLPDDFTGCV

PNFKDQVILLNKHIDAYKTFPPTPEPKDKKKKKADETQALPQRQKKQQTVTLLPAADLDDFSKQLQQSMSSAD

PNFKDQVILLNKHIDAYKTFPPTPEPKDKKKKKADETQALPQRQKKQQTVTLLPAADLDDFSKQLQQSMSSAD  
VCVADYSVLYNSASFSTFKCYGVSPKLNLCFTNVYADSFVIRGDEVQRQIAPGQTGKIADYNYKLPDDFTGCV

PNFKDQVILLNKHIDAYKTFPPTPEPKDKKKKKADETQALPQRQKKQQTVTLLPAADLDDFSKQLQQSMSSAD

PNFKDQVILLNKHIDAYKTFPPTPEPKDKKKKKADETQALPQRQKKQQTVTLLPAADLDDFSKQLQQSMSSAD

PNFKDQVILLNKHIDAYKTFPPTPEPKDKKKKKADETQALPQRQKKQQTVTLLPAADLDDFSKQLQQSMSSAD

PNFKDQVILLNKHIDAYKTFPPTPEPKDKKKKKADETQALPQRQKKQQTVTLLPAADLDDFSKQLQQSMSSAD

PNFKDQVILLNKHIDAYKTFPPTPEPKDKKKKKADETQALPQRQKKQQTVTLLPAADLDDFSKQLQQSMSSAD

STQA\*

IAWNSNNLDSKVGGNYNYLYRLFRKSNLKPFERDISTEIYQAGSTPCNGVEGFNCYFPLQSYGFQPTNGVGYC

STQA\*

STQA\*

STQA\*

IAWNSNNLDSKVGGNYNYLYRLFRKSNLKPFERDISTEIYQAGSTPCNGVEGFNCYFPLQSYGFQPTNGVGYC

STQA\*

STQA\*

IAWNSNNLDSKVGGNYNYLYRLFRKSNLKPFERDISTEIYQAGSTPCNGVEGFNCYFPLQSYGFQPTNGVGYC

STQA\*

STQA\*

STQA\*

STQA\*

STQA\*

QPYRVVLSFELLHAPATVCGPKKSTNLVKNKCVNFNFNGLTGTGVLTESNKKFLPFQQFGRDIADTTDAVRDI

QPYRVVLSFELLHAPATVCGPKKSTNLVKNKCVNFNFNGLTGTGVLTESNKKFLPFQQFGRDIADTTDAVRDI

QPYRVVLSFELLHAPATVCGPKKSTNLVKNKCVNFNFNGLTGTGVLTESNKKFLPFQQFGRDIADTTDAVRDI



PQTLEILDITPCSFGGVSVITPGTNTSNQVAVLYQDVNCTEVPVAIHADQLTPTWRVYSTGSNVFQTRAGCLIC

PQTLEILDITPCSFGGVSVITPGTNTSNQVAVLYQDVNCTEVPVAIHADQLTPTWRVYSTGSNVFQTRAGCLIC

PQTLEILDITPCSFGGVSVITPGTNTSNQVAVLYQDVNCTEVPVAIHADQLTPTWRVYSTGSNVFQTRAGCLIC





3AEHVNNSYECDIPIGAGICASYQTQTNSPRRARSVASQSIIAYTMSLGAENSVAYSNNSIAIPTNFTISVTTEILP

3AEHVNNSYECDIPIGAGICASYQTQTNSPRRARSVASQSIIAYTMSLGAENSVAYSNNSIAIPTNFTISVTTEILP

3AEHVNNSYECDIPIGAGICASYQTQTNSPRRARSVASQSIIAYTMSLGAENSVAYSNNSIAIPTNFTISVTTEILP



'VSMTKTSVDCTMYICGDSTECSNLLLQYGSFCTQLNRALTGIAVEQDKNTQEVFAQVKQIYKTPPIKDFGGFN

'VSMTKTSVDCTMYICGDSTECSNLLLQYGSFCTQLNRALTGIAVEQDKNTQEVFAQVKQIYKTPPIKDFGGFN

'VSMTKTSVDCTMYICGDSTECSNLLLQYGSFCTQLNRALTGIAVEQDKNTQEVFAQVKQIYKTPPIKDFGGFN



JFSQILPDPSKPSKRSEFIEDLLFNKVTLADAGFIKQYGDCLGDIAARDLICAQKFNGLTVLPPLLTDEMIAQYTSAL

JFSQILPDPSKPSKRSEFIEDLLFNKVTLADAGFIKQYGDCLGDIAARDLICAQKFNGLTVLPPLLTDEMIAQYTSAL

JFSQILPDPSKPSKRSEFIEDLLFNKVTLADAGFIKQYGDCLGDIAARDLICAQKFNGLTVLPPLLTDEMIAQYTSAL



LLAGTITSGWTFGAGAALQIPFAMQMAYRFNGIGVTQNVLYENQKLIANQFNSAIGKIQDLSSTASALGKLO

LLAGTITSGWTFGAGAALQIPFAMQMAYRFNGIGVTQNVLYENQKLIANQFNSAIGKIQDLSSTASALGKLO

LLAGTITSGWTFGAGAALQIPFAMQMAYRFNGIGVTQNVLYENQKLIANQFNSAIGKIQDLSSTASALGKLO





!DVVNQNAQALNTLVKQLSSNFGAISSVLNDILSRDKVEAEVQIDRLITGRLQSLQTYVTQQLIRAAEIRASANI

!DVVNQNAQALNTLVKQLSSNFGAISSVLNDILSRDKVEAEVQIDRLITGRLQSLQTYVTQQLIRAAEIRASANI

!DVVNQNAQALNTLVKQLSSNFGAISSVLNDILSRDKVEAEVQIDRLITGRLQSLQTYVTQQLIRAAEIRASANI



L

L

L

|         | subgenome | leader_end | TRS_start | nb_count             |
|---------|-----------|------------|-----------|----------------------|
| S1-Day1 | 1         | 63         | 5785      | 545(544,514,513,522) |
|         | 2         | 63         | 10978     | 116(116,0,0,4)       |
|         | 3         | 46         | 26422     | 60(60,59,59,54)      |
|         | 4         | 65         | 10636     | 29(29,24,24,24)      |
|         | 5         | 67         | 3362      | 75(75,72,72,72)      |
|         | 6         | 67         | 22404     | 55(55,0,0,0)         |
|         | 7         | 67         | 22503     | 227(225,1,1,4)       |
|         | 8         | 68         | 4580      | 308(308,276,276,288) |
|         | 9         | 69         | 13619     | 164(164,154,154,154) |
|         | 10        | 47         | 26421     | 22(22,22,22,22)      |
|         | 11        | 71         | 10926     | 12(12,0,0,2)         |
|         | 12        | 73         | 3372      | 127(127,124,124,126) |
|         | 13        | 74         | 21058     | 331(330,325,324,324) |
|         | 14        | 74         | 23112     | 26(26,0,0,2)         |
|         | 15        | 48         | 26443     | 123(123,122,122,122) |
|         | 16        | 48         | 28184     | 17(17,0,0,0)         |
| S2-Day2 | 1         | 58         | 13666     | 29(29,0,0,0)         |
|         | 2         | 58         | 26917     | 27(27,0,0,0)         |
|         | 3         | 62         | 3808      | 12(12,0,0,0)         |
|         | 4         | 63         | 3924      | 41(41,0,0,0)         |
|         | 5         | 63         | 20583     | 19(19,0,0,0)         |
|         | 6         | 63         | 23922     | 64(50,14,0,0)        |
|         | 7         | 46         | 26422     | 40(40,39,39,38)      |
|         | 8         | 67         | 3362      | 80(80,78,78,76)      |
|         | 9         | 67         | 22404     | 74(74,0,0,2)         |
|         | 10        | 67         | 22490     | 148(148,0,0,4)       |
|         | 11        | 67         | 26866     | 234(228,0,0,8)       |
|         | 12        | 68         | 5789      | 54(54,54,54,54)      |
|         | 13        | 68         | 14223     | 34(33,24,24,22)      |
|         | 14        | 69         | 3816      | 85(85,0,0,2)         |
|         | 15        | 69         | 11356     | 139(139,68,68,70)    |
|         | 16        | 69         | 13619     | 77(76,72,71,74)      |
|         | 17        | 69         | 19112     | 473(468,468,463,460) |
|         | 18        | 69         | 19571     | 22(21,0,0,0)         |
|         | 19        | 69         | 21305     | 16(16,0,0,0)         |
|         | 20        | 69         | 22382     | 50(50,0,0,2)         |
|         | 21        | 47         | 26421     | 20(20,19,19,18)      |
|         | 22        | 71         | 5708      | 107(64,43,0,4)       |
|         | 23        | 74         | 21058     | 31(31,30,30,30)      |
|         | 24        | 74         | 25858     | 131(131,122,122,124) |
|         | 25        | 48         | 26443     | 77(77,76,76,74)      |
|         | 26        | 48         | 28184     | 16(16,0,0,0)         |

|          |   |    |       |                         |
|----------|---|----|-------|-------------------------|
| S3-Day3  | 1 | 48 | 26443 | 12(12,12,12,12)         |
|          | 2 | 53 | 17675 | 21(19,0,0,0)            |
| S1-Day4  | 1 | 63 | 5785  | 23(23,23,23,22)         |
|          | 2 | 68 | 5789  | 1967(1964,1954,1951,19: |
|          | 3 | 75 | 28265 | 56(50,56,50,48)         |
|          | 4 | 48 | 28184 | 17(17,0,0,0)            |
| S2-Day5  | 1 | 48 | 28184 | 12(12,0,0,0)            |
| S3-Day6  |   |    |       |                         |
| S2-Day8  |   |    |       |                         |
| S3-Day9  |   |    |       |                         |
| S2-Day11 | 1 | 51 | 27203 | 26(21,0,0,2)            |
|          | 2 | 58 | 29871 | 56(7,0,0,0)             |
| S3-Day12 | 1 | 76 | 28267 | 18(17,17,16,0)          |
|          | 2 | 48 | 28184 | 35(35,0,0,0)            |
| S3-Day14 |   |    |       |                         |

The numbers in the bracket are (reads with left primers, reads with right primer:  
Normalized count=(Read count/Total number of read mapped on reference gen  
Total number of read mapped on reference genome is 36593897, 37733596, 33.  
“leader\_end” and “TRS\_start” refer to the position of the end of leader and the

normalized\_count

14.89(14.87,14.05,14.02,14.26)

3.17(3.17,0.00,0.00,0.11)

1.64(1.64,1.61,1.61,1.48)

0.79(0.79,0.66,0.66,0.66)

2.05(2.05,1.97,1.97,1.97)

1.50(1.50,0.00,0.00,0.00)

6.20(6.15,0.03,0.03,0.11)

8.42(8.42,7.54,7.54,7.87)

4.48(4.48,4.21,4.21,4.21)

0.60(0.60,0.60,0.60,0.60)

0.33(0.33,0.00,0.00,0.05)

3.47(3.47,3.39,3.39,3.44)

9.05(9.02,8.88,8.85,8.85)

0.71(0.71,0.00,0.00,0.05)

3.36(3.36,3.33,3.33,3.33)

0.46(0.46,0.00,0.00,0.00)

0.77(0.77,0.00,0.00,0.00)

0.72(0.72,0.00,0.00,0.00)

0.32(0.32,0.00,0.00,0.00)

1.09(1.09,0.00,0.00,0.00)

0.50(0.50,0.00,0.00,0.00)

1.70(1.33,0.37,0.00,0.00)

1.06(1.06,1.03,1.03,1.01)

2.12(2.12,2.07,2.07,2.01)

1.96(1.96,0.00,0.00,0.05)

3.92(3.92,0.00,0.00,0.11)

6.20(6.04,0.00,0.00,0.21)

1.43(1.43,1.43,1.43,1.43)

0.90(0.87,0.64,0.64,0.58)

2.25(2.25,0.00,0.00,0.05)

3.68(3.68,1.80,1.80,1.86)

2.04(2.01,1.91,1.88,1.96)

12.54(12.40,12.40,12.27,12.19)

0.58(0.56,0.00,0.00,0.00)

0.42(0.42,0.00,0.00,0.00)

1.33(1.33,0.00,0.00,0.05)

0.53(0.53,0.50,0.50,0.48)

2.84(1.70,1.14,0.00,0.11)

0.82(0.82,0.80,0.80,0.80)

3.47(3.47,3.23,3.23,3.29)

2.04(2.04,2.01,2.01,1.96)

0.42(0.42,0.00,0.00,0.00)

0.36(0.36,0.36,0.36,0.36)  
0.63(0.57,0.00,0.00,0.00)  
0.68(0.68,0.68,0.68,0.65)  
57.94(57.85,57.56,57.47,56.73)  
1.65(1.47,1.65,1.47,1.41)  
0.50(0.50,0.00,0.00,0.00)  
0.43(0.43,0.00,0.00,0.00)

1.50(1.21,0.00,0.00,0.12)  
3.23(0.40,0.00,0.00,0.00)  
1.06(1.00,1.00,0.94,0.00)  
2.06(2.06,0.00,0.00,0.00)

s, reads with both primers, same junction on paired reads with at least a primer).

ome)\*1000000.

222295, 33949503, 28220017, 28624584, 16048939, 12949851, 17312079, 17029467, 20512435 and 1  
position of the start of TRS identified in the reads >10.





L0143083, excluding the mapped reads unpaired, not primary alignment and supplementary aliq



gment.

|          | subgenome | leader_end | TRS_start | nb_count                  | normalized_count                    |
|----------|-----------|------------|-----------|---------------------------|-------------------------------------|
| S1-Day1  | 1         | 46         | 26422     | 69(69,69,69,69)           | 1.92(1.92,1.92,1.92,1.78)           |
|          | 2         | 66         | 13865     | 21(21,0,0,0)              | 0.58(0.58,0.00,0.00,0.00)           |
|          | 3         | 68         | 2689      | 87(74,83,70,62)           | 2.42(2.06,2.31,1.95,1.84)           |
|          | 4         | 70         | 14372     | 44(44,0,0,0)              | 1.22(1.22,0.00,0.00,0.00)           |
|          | 5         | 71         | 27762     | 13(13,10,10,10)           | 0.36(0.36,0.28,0.28,0.28)           |
| S2-Day2  | 6         | 74         | 21058     | 664(659,660,665,664)      | 18.47(18.33,18.36,18.22,18.42)      |
|          | 7         | 75         | 26486     | 489(489,482,496,489)      | 13.60(13.60,13.41,13.41,13.79)      |
|          | 8         | 47         | 26421     | 40(40,37,37,37)           | 1.11(1.11,1.03,1.03,1.06)           |
|          | 9         | 75         | 28265     | 619(616,610,625,619)      | 17.22(17.14,16.97,16.88,16.99)      |
|          | 10        | 48         | 26443     | 138(138,137,139,138)      | 3.84(3.84,3.81,3.81,3.73)           |
|          | 11        | 48         | 28184     | 12(12,0,0,0)              | 0.33(0.33,0.00,0.00,0.00)           |
| S3-Day3  | 1         | 54         | 11373     | 41(37,0,0,0)              | 1.53(1.38,0.00,0.00,0.00)           |
|          | 2         | 58         | 13668     | 214(214,0,0,0)            | 7.97(7.97,0.00,0.00,0.00)           |
| S1-Day4  | 1         | 46         | 26422     | 46(46,46,46,46)           | 1.25(1.25,1.25,1.25,1.25)           |
|          | 2         | 64         | 22501     | 363(362,2,2,2)            | 9.89(9.86,0.05,0.05,0.16)           |
|          | 3         | 47         | 26421     | 30(30,30,30,30)           | 0.82(0.82,0.82,0.82,0.82)           |
|          | 4         | 67         | 22503     | 428(428,0,0,2)            | 11.66(11.66,0.00,0.00,0.05)         |
|          | 5         | 69         | 13425     | 486(449,2,0,3)            | 13.24(12.23,0.05,0.00,0.82)         |
| S2-Day5  | 6         | 69         | 19112     | 7376(7374,7378,7374,7376) | 200.92(200.87,200.16,200.92,200.92) |
|          | 7         | 74         | 21058     | 1414(1413,1415,1414,1414) | 38.52(38.49,38.24,38.22,37.99)      |
|          | 8         | 76         | 28267     | 21(21,19,19,19)           | 0.57(0.57,0.52,0.52,0.22)           |
|          | 9         | 48         | 26443     | 138(138,138,138,138)      | 3.76(3.76,3.76,3.76,3.70)           |
|          | 10        | 48         | 28184     | 15(15,0,0,0)              | 0.41(0.41,0.00,0.00,0.00)           |
|          | 11        | 49         | 19103     | 28(28,28,28,28)           | 0.76(0.76,0.76,0.76,0.76)           |
| S3-Day6  | 1         | 65         | 10133     | 380(380,379,381,380)      | 15.00(15.00,14.97,14.97,14.97)      |
|          | 2         | 69         | 13619     | 279(279,268,290,279)      | 11.02(11.02,10.58,10.58,10.58)      |
|          | 1         | 65         | 5807      | 2104(2104,2104,2104,2104) | 69.76(69.76,69.53,69.53,68.53)      |
|          | 2         | 48         | 26443     | 16(16,16,16,16)           | 0.53(0.53,0.53,0.53,0.53)           |
| S2-Day8  | 3         | 70         | 2794      | 28(28,26,26,26)           | 0.93(0.93,0.86,0.86,0.93)           |
|          | 4         | 48         | 28184     | 20(20,0,0,2)              | 0.66(0.66,0.00,0.00,0.07)           |
|          | 5         | 74         | 28998     | 28(2,0,0,0)               | 0.93(0.07,0.00,0.00,0.00)           |
| S3-Day9  |           |            |           |                           |                                     |
| S2-Day11 | 1         | 58         | 29871     | 38(2,0,0,0)               | 2.39(0.13,0.00,0.00,0.00)           |
|          | 2         | 71         | 27762     | 90(90,90,90,90)           | 5.67(5.67,5.67,5.67,5.42)           |
| S3-Day12 |           |            |           |                           |                                     |
| S3-Day18 |           |            |           |                           |                                     |

The numbers in the bracket are (reads with left primers, reads with right primers, reads with both primers, reads with no primers)  
Normalized count=(Read count/Total number of read mapped on reference genome)\*1000000.  
Total number of read mapped on reference genome is 17428684, 35949645, 26863662, 2872584  
“leader\_end” and “TRS\_start” refer to the position of the end of leader and the position of the s

1.25)

1.35)

1.47)

)

)

10,193.95)

1.97)

1.53)

1.19)

1.57)

th primers, same junction on paired reads with at least a primer).

40, 36710848, 25324959, 30161120, 22185877, 15869342, 12758257, 18881995 and 15093231,  
start of TRS identified in the reads >10.

excluding the mapped reads unpaired, not primary alignment and supplementary alignment.

|         | subgenome | leader_end | TRS_start | ACGAAC | ATG_postion | known_ATG |
|---------|-----------|------------|-----------|--------|-------------|-----------|
| S1-Day1 | 1         | 63         | 5785      | no     | 5859        | -         |
|         | 2         | 63         | 10978     | no     | 11062       | -         |
|         | 3         | 46         | 26422     | yes    | 26523       | M         |
|         | 4         | 65         | 10636     | no     | 10662       | -         |
|         | 5         | 67         | 3362      | no     | 3375        | -         |
|         | 6         | 67         | 22404     | no     | 22407       | -         |
|         | 7         | 67         | 22503     | no     | 22614       | -         |
|         | 8         | 68         | 4580      | no     | 4590        | -         |
|         | 9         | 69         | 13619     | no     | 13625       | -         |
|         | 10        | 47         | 26421     | yes    | 26523       | M         |
|         | 11        | 71         | 10926     | no     | 10938       | -         |
|         | 12        | 73         | 3372      | no     | 3375        | -         |
|         | 13        | 74         | 21058     | no     | 21071       | -         |
|         | 14        | 74         | 23112     | no     | 23118       | -         |
|         | 15        | 48         | 26443     | yes    | 26523       | M         |
|         | 16        | 48         | 28184     | no     | 28207       | -         |
| S2-Day2 | 1         | 58         | 13666     | no     | 13685       | -         |
|         | 2         | 58         | 26917     | yes    | 27202       | ORF6      |
|         | 3         | 62         | 3808      | no     | 3813        | -         |
|         | 4         | 63         | 3924      | no     | 3948        | -         |
|         | 5         | 63         | 20583     | no     | 20608       | -         |
|         | 6         | 63         | 23922     | no     | 24051       | -         |
|         | 7         | 46         | 26422     | yes    | 26523       | M         |
|         | 8         | 67         | 3362      | no     | 3375        | -         |
|         | 9         | 67         | 22404     | no     | 22407       | -         |
|         | 10        | 67         | 22490     | no     | 22614       | -         |
|         | 11        | 67         | 26866     | no     | 26896       | -         |
|         | 12        | 68         | 5789      | no     | 5859        | -         |
|         | 13        | 68         | 14223     | no     | 14258       | -         |
|         | 14        | 69         | 3816      | no     | 3842        | -         |
|         | 15        | 69         | 11356     | no     | 11367       | -         |
|         | 16        | 69         | 13619     | no     | 13625       | -         |
| 17      | 69        | 19112      | no        | 19148  | -           |           |
| 18      | 69        | 19571      | no        | 19631  | -           |           |
| 19      | 69        | 21305      | no        | 21317  | -           |           |
| 20      | 69        | 22382      | no        | 22401  | -           |           |
| 21      | 47        | 26421      | yes       | 26523  | M           |           |
| 22      | 71        | 5708       | no        | 5718   | -           |           |
| 23      | 74        | 21058      | no        | 21071  | -           |           |
| 24      | 74        | 25858      | no        | 25910  | -           |           |
| 25      | 48        | 26443      | yes       | 26523  | M           |           |
| 26      | 48        | 28184      | no        | 28207  | -           |           |

|          |   |    |       |     |       |   |
|----------|---|----|-------|-----|-------|---|
| S3-Day3  | 1 | 48 | 26443 | yes | 26523 | M |
|          | 2 | 53 | 17675 | no  | 17681 | - |
|          | 1 | 63 | 5785  | no  | 5859  | - |
| S1-Day4  | 2 | 68 | 5789  | no  | 5859  | - |
|          | 3 | 75 | 28265 | no  | 28274 | N |
|          | 4 | 48 | 28184 | no  | 28207 | - |
| S2-Day5  | 1 | 48 | 28184 | no  | 28207 | - |
| S3-Day6  |   |    |       |     |       |   |
| S2-Day8  |   |    |       |     |       |   |
| S3-Day9  |   |    |       |     |       |   |
| S2-Day11 | 1 | 51 | 27203 | no  | 27256 | - |
|          | 2 | 58 | 29871 | no  | 29868 | - |
| S3-Day12 | 1 | 76 | 28267 | no  | 28274 | N |
|          | 2 | 48 | 28184 | no  | 28207 | - |
| S3-Day14 |   |    |       |     |       |   |

“peak\_leader” and “peak\_TRS\_start” point to the leader-TRS junctions in sheet "novel", "ACGA.



20\_leader\_se TRS\_seq first\_orf\_aa  
CGATCTCTTG TTCTAAAGAA MFSTKKTVTQQP\*  
CGATCTCTTG AGTGAAAAG MVFVLFV\*  
ACAAACCAAC TCTCGTGTTA MADSNGTITVEELKKLLEQWNLVIGFLFTWICLLQFAYANRNRFLYIIKLIFLV  
ATCTCTTGTA TGGTACGGA MF\*  
CTCTTG TAGA AACTTACTG MYTLKMQTLWKKLKR\*  
CTCTTG TAGA AAA MEPLQML\*  
CTCTTG TAGA AACTTCTAA MLGTGRESATVLLIILSYIIPHHFPLLSVMECLLN\*  
TCTTG TAGAT AACGATCTAA MKLLLQCHLAM\*  
CTTG TAGATC ACGAAG MTI\*  
CAAACCAACC CTCTCGTGTT MADSNGTITVEELKKLLEQWNLVIGFLFTWICLLQFAYANRNRFLYIIKLIFLV  
TG TAGATCTG TTACACCTTT MLLDNAQVLLSKVQ\*  
TAGATCTGTT ACA MYTLKMQTLWKKLKR\*  
AGATCTGTT CCTAAGACTA MLQKKMTLKRVSFTFVGLYNKS\*  
AGATCTGTT TTCTAC MHQQLFVDLKSLLIWLKTNVSISTSMV\*  
AAACCAACCA TCTTCTAGAG MADSNGTITVEELKKLLEQWNLVIGFLFTWICLLQFAYANRNRFLYIIKLIFLV  
AAACCAACCA TCTTG TAGTG MKTF\*  
ACTTTG ATC ACTTTCTCTA MKKQFIYLRIVQLLLNMTSLSLE\*  
ACTTTG ATC CGCTTCTAGA MFHLVDFQVTIAEILLIIMRTFKVSIWNLDYIINLIKNLSKSLTENKYSQLDEEC  
TCGATCTCTT TCTCT MTNLFQAFWK\*  
CGATCTCTTG CTTCAGTTGA MIRKSKLVKKLQQLWKKLSSSQKTCYFILTLMAIFIQILPLLLVTLTSL\*  
CGATCTCTTG TATTGACTAT MLWCKDGHVETFPKQSSQAWQPGVAMPNLYKMQRMLLEKCDLQNYC  
CGATCTCTTG AAATTTACAA MLASSNNMVIALVILLETFSVHKSLTALLFCHLCSQMK\*  
ACAAACCAAC TCTCGTGTTA MADSNGTITVEELKKLLEQWNLVIGFLFTWICLLQFAYANRNRFLYIIKLIFLV  
CTCTTG TAGA AACTTACTG MYTLKMQTLWKKLKR\*  
CTCTTG TAGA AAA MEPLQML\*  
CTCTTG TAGA AAAGGAATC MLGTGRESATVLLIILSYIIPHHFPLLSVMECLLN\*  
CTCTTG TAGA AACTAACAT MALF\*  
TCTTG TAGAT AAAGAAACT MFSTKKTVTQQP\*  
TCTTG TAGAT AACAAAGCC MTSRKRK\*  
CTTG TAGATC ACAAAGCTT MPHILTNSQM VYAYFGIAMSIDILLIPLFVDLTLECYLTLTCLVVMVAVCM\*  
CTTG TAGATC ACAAACAATT MWLLML\*  
CTTG TAGATC GCGAACAAA MVMSCMQITYFGGIQIQFSCLPILYLT\*  
CTTG TAGATC ACTTTTCTAT MKMEPLQML\*  
CAAACCAACC CTCTCGTGTT MADSNGTITVEELKKLLEQWNLVIGFLFTWICLLQFAYANRNRFLYIIKLIFLV  
TG TAGATCTG GAACTAAG MVHLLVLVSTLVITSVVTINI\*  
AGATCTGTT CCTAAGACTA MLQKKMTLKRVSFTFVGLYNKS\*  
AGATCTGTT TATTGTATAC MAQQVFLNMTRLRVILKNGNLE\*  
AAACCAACCA TCTTCTAGAG MADSNGTITVEELKKLLEQWNLVIGFLFTWICLLQFAYANRNRFLYIIKLIFLV  
AAACCAACCA TCTTG TAGTG MKTF\*

AAACCAACCA/TCTTCTAGAG MADSNGTITVEELKKLLEQWNLVIGFLFTWICLLQFAYANRNRFLYIIKLIFLV  
AACCAACTTT TCACGC MMFHLQLTGHK\*  
CGATCTCTTG TTCTAAAGAA MFSTKKTVTQQP\*  
TCTTGTAGAT AAAGAAACT MFSTKKTVTQQP\*  
GATCTGTTCT CAAACTAAA MSDNGPQNQRNAPRITFGG PSDSTG SNQNGERSG ARSKQRRPQGLP NNT  
AAACCAACCA/TCTTGTAGTG MKTF\*  
AAACCAACCA/TCTTGTAGTG MKTF\*

CCAACCAACT TGTTTCATCT(MRTFKVSIWNLDYIINLIKNLSKSLTENKYSQLDEEQPMEID\*  
ACTTTTCGATC -  
ATCTGTTCTC AACTAAA MSDNGPQNQRNAPRITFGG PSDSTG SNQNGERSG ARSKQRRPQGLP NNT  
AAACCAACCA/TCTTGTAGTG MKTF\*

AC" indicates if there is a ACGAAC sequences in the "TRS\_seq" (TRS sequences), "20\_leader\_sec

MLLWPVTLACFVLAAYRINWITGGIAIAMAACLVGLMWLSYFIASFRLFARTRSMWSFNPETNILLNVPLHGT

MLLWPVTLACFVLAAYRINWITGGIAIAMAACLVGLMWLSYFIASFRLFARTRSMWSFNPETNILLNVPLHGT

MLLWPVTLACFVLAAYRINWITGGIAIAMAACLVGLMWLSYFIASFRLFARTRSMWSFNPETNILLNVPLHGT

}PMEID\*

3DSATLPKGIMMNVAKYTQLCQYLNTLTLAVPYNMRVIHFGAGSDKGVAPGTAVLRQWLPTGTLVDSDLN

MLLWPVTLACFVLAAYRINWITGGIAIAMAACLVGLMWLSYFIASFRLFARTRSMWSFNPETNILLNVPLHGT

'KFLTENLLLYIDINGNLHPDSATLVSDIDITFLKKDAPYIVGDVVQEGVLTAVVIPTKKAGGTTEMLAKALRKVP'

MLLWPVTLACFVLAAYRINWITGGIAIAMAACLVGLMWLSYFIASFRLFARTRSMWSFNPETNILLNVPLHGT

MLLWPVTLACFVLAAYRINWITGGIAIAMAACLVGLMWLSYFIASFRLFARTRSMWSFNPETNILLNVPLHGT

MLLWPVTLACFVLAAYRINWITGGIAIAMAACLVGLMWLSYFIASFRLFARTRSMWSFNPETNILLNVPLHGT

ASWFTALTQHGKEDLKFPRGQGVPIINTNSSPDDQIGYYRRATRRIRGGDGKMKDLSRWYFYLLGTGPEAG

ASWFTALTQHGKEDLKFPRGQGVPIINTNSSPDDQIGYYRRATRRIRGGDGKMKDLSRWYFYLLGTGPEAG

γ” refers to the 20 sequences before the end of the leader, “AUG\_postion” and “first\_orf\_aa” re

'ILTRP LLESELVIGAVILRGHLRIAGHHLGRCDIKDLPKEITVATSRTLSYYKLGASQRVAGDSGFAAYSRYRIGNY

'ILTRP LLESELVIGAVILRGHLRIAGHHLGRCDIKDLPKEITVATSRTLSYYKLGASQRVAGDSGFAAYSRYRIGNY

'ILTRP LLESELVIGAVILRGHLRIAGHHLGRCDIKDLPKEITVATSRTLSYYKLGASQRVAGDSGFAAYSRYRIGNY

DFVSDADSTLIGDCATVHTANKWDLIISDMYDPKTKNVTKENDSKEGFFTYICGFIQQKLALGGSVAIKITEHS\

'ILTRP LLESELVIGAVILRGHLRIAGHHLGRCDIKDLPKEITVATSRTLSYYKLGASQRVAGDSGFAAYSRYRIGNY

TDNYITTPGQGLNGYTVEEAKTVLKKCKSAFYILPSIISNEKQEILGTVSWNLREMLAHAEETRKLMPVCVETK

'ILTRP LLESELVIGAVILRGHLRIAGHHLGRCDIKDLPKEITVATSRTLSYYKLGASQRVAGDSGFAAYSRYRIGNY

'ILTRP LLESELVIGAVILRGHLRIAGHHLGRCDIKDLPKEITVATSRTLSYYKLGASQRVAGDSGFAAYSRYRIGNY

ILTRP LLESELVIGAVILRGHLRIAGHHLGRCDIKDLPKEITVATSRTLSYYKLGASQRVAGDSGFAAYSRYRIGNY

ILPYGANKDGIWVATEGALNTPKDHIGTRNPANNAIVLQLPQGTTLPKGFYAEGSRGGSQASSRSSSRRN!

ILPYGANKDGIWVATEGALNTPKDHIGTRNPANNAIVLQLPQGTTLPKGFYAEGSRGGSQASSRSSSRRN!

refer to the first AUG position and translated orf of the sgRNA, and "known\_ATG" indicates if th

'KLNTDHSSSSDNIALLVQ\*

'KLNTDHSSSSDNIALLVQ\*

'KLNTDHSSSSDNIALLVQ\*

WNADLYKLMGHFAWWTAFVTNVNASSEAFLLGKPREQIDGYVMHANYIFWRNTNPIQLSSYSLFD

'KLNTDHSSSSDNIALLVQ\*

LAIVSTIQRKYKGIKIQEGVVDYGARFYFYSKTTVASLINTLNDLNETLVTMPLGYVTHGLNLEEAARYMRSK\

'KLNTDHSSSSDNIALLVQ\*

'KLNTDHSSSSDNIALLVQ\*

'KLNTDHSSSDNIALLVQ\*

SSRNSTPGSSRGTS PARMAGNGGDAALALLLDRLNQLESKMSGKGQQQGGQTVTKKSAEASKKPRQKR1

SSRNSTPGSSRGTS PARMAGNGGDAALALLLDRLNQLESKMSGKGQQQGGQTVTKKSAEASKKPRQKR1

the first AUG position is the same as a known sgmRNA.



MSKFPLKLRGTAVMSLKEGQINDMILSLLSKGRLIIRENNRVVISSDVLVNN\*

/PATVSVSPDAVTAYNGYLTSSSKTPEEHFIETISLAGSYKDWSYSGQSTQLGIEFLKRGDKSVYYTSNPTTFHL

ΓATKAYNVTQAFGRRGPEQTQGNFGDQELIRQGTDYKHWPQIAQFAPSASAFFGMSRIGMEVTPSGTWLT`

ΓATKAYNVTQAFGRRGPEQTQGNFGDQELIRQGTDYKHWPQIAQFAPSASAFFGMSRIGMEVTPSGTWLT`

DGEVITFDNLKTLLSLREVRTIKVFTTVDNINLHTQVVDMSMTYGQQFGPTYLDGADVTKIKPHNSHEGKTFY

YTGAIKLDDKDPNFKDQVILLNKHIDAYKTFPPTEPKDKKKKADETQALPQRQKKQQTVTLLPAADLDDFSK

YTGAIKLDDKDPNFKDQVILLNKHIDAYKTFPPTEPKDKKKKADETQALPQRQKKQQTVTLLPAADLDDFSK

VLPNDDTLRVEAFEYYHTDPSFLGRYMSALNHTKKWKYPQVNGLTSIKWADNNCYLATALLTQQIELKFN

2LQQSMSSADSTQA\*

2LQQSMSSADSTQA\*

PPALQDAYYRARAGEAANFCALILAYCNKTVGELGDVRETMSYLFQHANLDSCKRVLNVVCKTCGQQQTTLK





{GVEAVMYMGTLSEYEQFKKGVQIPCTCGKQATKYLQQESPFVMMMSAPPAQYELKHGTFTCASEYTGNYQC



:GHYKHITSKETLYCIDGALLTKSSEYKGPITDVFYKENSYTTTIKPVTYKLDGVVCTEIDPKLDNYYKKDNSYFTEC



ǾPIDLVPNQYPNASFDNFKFVCDNIKFADDLNQLTGYKKPASRELKVTFPPDLNGDVVAIDYKHYTPSFKKGA



JLLHKPIVWHVNNATNKATYKPNTWCIRCLWSTKPVETSNSFDVLKSEDAQGMDNLACEDLKPVSEEVVEN





IPTIQKDVLECNVKTTEVVGDIILKPANNLSKITEEVGHTDLMAAYVDNSSLTIKKPNELSRVLGLKTLATHGLAA



(VNSVPWDTIANYAKPFLNKVVSTTTNIVTRCLNRVCTNYMPYFFLLLQLCTFTRSTNSRIKASMPPTTIKNTV



'KSVGKFCLEASFN

|          | subgenome | leader_end | TRS_start | ACGAAC | ATG_postion | known_ATG |
|----------|-----------|------------|-----------|--------|-------------|-----------|
| S1-Day1  |           |            |           |        |             |           |
|          | 1         | 46         | 26422     | yes    | 26523       | M         |
|          | 2         | 66         | 13865     | no     | 13898       | -         |
|          | 3         | 68         | 2689      | no     | 2745        | -         |
|          | 4         | 70         | 14372     | no     | 14381       | -         |
|          | 5         | 71         | 27762     | no     | 27825       | -         |
| S2-Day2  | 6         | 74         | 21058     | no     | 21071       | -         |
|          | 7         | 75         | 26486     | no     | 26523       | M         |
|          | 8         | 47         | 26421     | yes    | 26523       | M         |
|          | 9         | 75         | 28265     | no     | 28274       | N         |
|          | 10        | 48         | 26443     | yes    | 26523       | M         |
|          | 11        | 48         | 28184     | no     | 28207       | -         |
| S3-Day3  | 1         | 54         | 11373     | no     | 11373       | -         |
|          | 2         | 58         | 13668     | no     | 13685       | -         |
| S1-Day4  |           |            |           |        |             |           |
|          | 1         | 46         | 26422     | yes    | 26523       | M         |
|          | 2         | 64         | 22501     | no     | 22614       | -         |
|          | 3         | 47         | 26421     | yes    | 26523       | M         |
|          | 4         | 67         | 22503     | no     | 22614       | -         |
|          | 5         | 69         | 13425     | no     | 13433       | -         |
| S2-Day5  | 6         | 69         | 19112     | no     | 19148       | -         |
|          | 7         | 74         | 21058     | no     | 21071       | -         |
|          | 8         | 76         | 28267     | no     | 28274       | N         |
|          | 9         | 48         | 26443     | yes    | 26523       | M         |
|          | 10        | 48         | 28184     | no     | 28207       | -         |
|          | 11        | 49         | 19103     | no     | 19148       | -         |
| S3-Day6  | 1         | 65         | 10133     | no     | 10152       | -         |
|          | 2         | 69         | 13619     | no     | 13625       | -         |
|          | 1         | 65         | 5807      | no     | 5859        | -         |
|          | 2         | 48         | 26443     | yes    | 26523       | M         |
| S2-Day8  | 3         | 70         | 2794      | no     | 2802        | -         |
|          | 4         | 48         | 28184     | no     | 28207       | -         |
|          | 5         | 74         | 28998     | no     | 29079       | -         |
| S3-Day9  |           |            |           |        |             |           |
|          | 1         | 58         | 29871     | no     | 29868       | -         |
| S2-Day11 | 2         | 71         | 27762     | no     | 27825       | -         |
| S3-Day12 |           |            |           |        |             |           |
| S3-Day18 |           |            |           |        |             |           |

“peak\_leader” and “peak\_TRS\_start” point to the leader-TRS junctions in sheet "novel", “ACGAA

20\_leader\_se TRS\_seq first\_orf\_aa

ACAAACCAAC TCTCGTGTTA, MADSNGTITVEELKKLLEQWNLVIGFLFTWICLLQFAYANRNRFLYIIKLIFLW  
TCTCTTGTAG, TAAAAGAAA1MMIISIKRTGMIL\*  
TCTTGTAGAT AACAAACAA1MTL\*  
TTGTAGATCT CAAACTTTA MFYSLQCSHLQVLDH\*  
TG TAGATCTG GAACTTTCAT MLIIFWFSLELQDHNETCHA\*  
AGATCTG TTC CTAAGACTA MLQKKMTLKRVSFLT FVGLYNKS\*  
GATCTGTTCT TATATTAGTT MADSNGTITVEELKKLLEQWNLVIGFLFTWICLLQFAYANRNRFLYIIKLIFLW  
CAAACCAACC CTCTCGTGTT, MADSNGTITVEELKKLLEQWNLVIGFLFTWICLLQFAYANRNRFLYIIKLIFLW  
GATCTGTTCT CAACTAAA MSDNGPQNQRNAPRITFGGSPDSTGSNQNNGERSGARSKQRRPQGLPNNT/  
AAACCAACCA TCTTCTAGAG MADSNGTITVEELKKLLEQWNLVIGFLFTWICLLQFAYANRNRFLYIIKLIFLW  
AAACCAACCA TCTTGTAGTG MKTF\*  
ACCAACTTTC - MVLGECGHL\*  
ACTTTTCGATC TTTCTCTAAC1MKKQFIIYL RIVQLLLNMTSLSLE\*

ACAAACCAAC TCTCGTGTTA, MADSNGTITVEELKKLLEQWNLVIGFLFTWICLLQFAYANRNRFLYIIKLIFLW  
GATCTCTTGT, TCAAACCTCT, MLGTGRESATVLLIILSYIIPHHFPLLSVMECLLN\*  
CAAACCAACC CTCTCGTGTT, MADSNGTITVEELKKLLEQWNLVIGFLFTWICLLQFAYANRNRFLYIIKLIFLW  
CTCTTGTAGA AACTTCTAA MLGTGRESATVLLIILSYIIPHHFPLLSVMECLLN\*  
CTTGTAGATC GCGAACCC MLQSADAQSFLNGFAV\*  
CTTGTAGATC ACAAAGCTTA MPHILTNSQM VYAYFGIAMSIDILLIPLFVDLTLECYLTLTCLVVMVAVCM\*  
AGATCTG TTC CTAAGACTA MLQKKMTLKRVSFLT FVGLYNKS\*  
ATCTGTTCTC AACTAAA MSDNGPQNQRNAPRITFGGSPDSTGSNQNNGERSGARSKQRRPQGLPNNT/  
AAACCAACCA TCTTCTAGAG MADSNGTITVEELKKLLEQWNLVIGFLFTWICLLQFAYANRNRFLYIIKLIFLW  
AAACCAACCA TCTTGTAGTG MKTF\*  
AACCAACCA TTTGTAGTGA MPHILTNSQM VYAYFGIAMSIDILLIPLFVDLTLECYLTLTCLVVMVAVCM\*  
ATCTCTTGTA CTTAACGGTC MT\*  
CTTGTAGATC ACGAAG MTI\*  
ATCTCTTGTA ATAGACGGTC MFSTKKT V TQQP\*  
AAACCAACCA TCTTCTAGAG MADSNGTITVEELKKLLEQWNLVIGFLFTWICLLQFAYANRNRFLYIIKLIFLW  
TTGTAGATCT TGAAC TTG MKGLIKYLMRSALPIQLNSVQK\*  
AAACCAACCA TCTTGTAGTG MKTF\*  
AGATCTG TTC AAGGCCAAA(M\*

ACTTTTCGATC -  
TG TAGATCTG GAACTTTCAT MLIIFWFSLELQDHNETCHA\*

“C” indicates if there is a ACGAAC sequences in the “TRS\_seq” (TRS sequences), “20\_leader\_seq”

/LLWPVTLACFVLAAYRINWITGGIAIAMAACLVGLMWLSYFIASFRLFARTRSMWSFNPETNILLNVPLHGTIL

/LLWPVTLACFVLAAYRINWITGGIAIAMAACLVGLMWLSYFIASFRLFARTRSMWSFNPETNILLNVPLHGTIL  
/LLWPVTLACFVLAAYRINWITGGIAIAMAACLVGLMWLSYFIASFRLFARTRSMWSFNPETNILLNVPLHGTIL  
ASWFTALTQHGKEDLKFRGQGVPIINTNSSPDDQIGYRRATRRIRGGDGKMKDLSRWYFYLLGTGPEAGLI  
/LLWPVTLACFVLAAYRINWITGGIAIAMAACLVGLMWLSYFIASFRLFARTRSMWSFNPETNILLNVPLHGTIL

/LLWPVTLACFVLAAYRINWITGGIAIAMAACLVGLMWLSYFIASFRLFARTRSMWSFNPETNILLNVPLHGTIL

/LLWPVTLACFVLAAYRINWITGGIAIAMAACLVGLMWLSYFIASFRLFARTRSMWSFNPETNILLNVPLHGTIL

ASWFTALTQHGKEDLKFRGQGVPIINTNSSPDDQIGYRRATRRIRGGDGKMKDLSRWYFYLLGTGPEAGLI  
/LLWPVTLACFVLAAYRINWITGGIAIAMAACLVGLMWLSYFIASFRLFARTRSMWSFNPETNILLNVPLHGTIL

/LLWPVTLACFVLAAYRINWITGGIAIAMAACLVGLMWLSYFIASFRLFARTRSMWSFNPETNILLNVPLHGTIL

refers to the 20 sequences before the end of the leader, "AUG\_postion" and "first\_orf\_aa" refer



TRP LLESELVIGAVILRGHLRIAGHHLGRCDIKDLPKEITVATSRTL SYYKLGASQRVAGDSGFAAYSRYRIGNYKLI

TRP LLESELVIGAVILRGHLRIAGHHLGRCDIKDLPKEITVATSRTL SYYKLGASQRVAGDSGFAAYSRYRIGNYKLI  
TRP LLESELVIGAVILRGHLRIAGHHLGRCDIKDLPKEITVATSRTL SYYKLGASQRVAGDSGFAAYSRYRIGNYKLI  
PYGANKDGI I WVATEGALNTPKDHIGTRNPANNA AIVLQLPQGTTLPKGFYAEGSRGGSQASSR SSSRSRNSSF  
TRP LLESELVIGAVILRGHLRIAGHHLGRCDIKDLPKEITVATSRTL SYYKLGASQRVAGDSGFAAYSRYRIGNYKLI

TRP LLESELVIGAVILRGHLRIAGHHLGRCDIKDLPKEITVATSRTL SYYKLGASQRVAGDSGFAAYSRYRIGNYKLI

TRP LLESELVIGAVILRGHLRIAGHHLGRCDIKDLPKEITVATSRTL SYYKLGASQRVAGDSGFAAYSRYRIGNYKLI

PYGANKDGI I WVATEGALNTPKDHIGTRNPANNA AIVLQLPQGTTLPKGFYAEGSRGGSQASSR SSSRSRNSSF  
TRP LLESELVIGAVILRGHLRIAGHHLGRCDIKDLPKEITVATSRTL SYYKLGASQRVAGDSGFAAYSRYRIGNYKLI

TRP LLESELVIGAVILRGHLRIAGHHLGRCDIKDLPKEITVATSRTL SYYKLGASQRVAGDSGFAAYSRYRIGNYKLI

· to the first AUG position and translated orf of the sgmRNA, and “known\_ATG” indicates if the fi

NTDHSSSSDNIALLVQ\*

NTDHSSSSDNIALLVQ\*

NTDHSSSSDNIALLVQ\*

{NSTPGSSRGTSPARMAGNGGDAALALLLDRLNQLKESKMSGKGGQQQQGQTVTKKSAAEASKKPRQKRTAT}

NTDHSSSSDNIALLVQ\*

NTDHSSSSDNIALLVQ\*

NTDHSSSSDNIALLVQ\*

{NSTPGSSRGTSPARMAGNGGDAALALLLDRLNQLKESKMSGKGGQQQQGQTVTKKSAAEASKKPRQKRTAT}

NTDHSSSSDNIALLVQ\*

NTDHSSSSDNIALLVQ\*

rst AUG position is the same as a known sgmRNA.

◁AYNVTQAFGRRGPEQTQGNFGDQELIRQGTDYKHWPQIAQFAPSASAFFGMSRIGMEVTPSGTWLTYTGA

◁AYNVTQAFGRRGPEQTQGNFGDQELIRQGTDYKHWPQIAQFAPSASAFFGMSRIGMEVTPSGTWLTYTGA

.JKLDDKDPNFKDQVILLNKHIDAYKTFPPTPEPKDKKKKADETQALPQRQKKQQTVTLLPAADLDDFSKQLQQS

.JKLDDKDPNFKDQVILLNKHIDAYKTFPPTPEPKDKKKKADETQALPQRQKKQQTVTLLPAADLDDFSKQLQQS

5MSSADSTQA\*

5MSSADSTQA\*

|               | subgenome | ref_leader_ei | peak_leader_ref | TRS_start | peak_TRS_start | peak_count    |
|---------------|-----------|---------------|-----------------|-----------|----------------|---------------|
| Patient1-day1 | S         | 65            | 0               | 21552     | 0              | 0             |
|               | ORF3a     | 69            | 0               | 25385     | 0              | 0             |
|               | E         | 69            | 0               | 26237     | 0              | 0             |
|               | M         | 65            | 0               | 26469     | 0              | 0             |
|               | ORF6      | 69            | 0               | 27041     | 0              | 0             |
|               | ORF7a     | 69            | 0               | 27388     | 0              | 0             |
|               | ORF7b     | 65            | 0               | 27644     | 0              | 0             |
|               | ORF8      | 65            | 0               | 27884     | 0              | 0             |
|               | N         | 65            | 65              | 28256     | 28256          | 453(447,423,  |
|               | ORF10     | 65            | 0               | 29530     | 0              | 0             |
| Patient2-day1 | S         | 65            | 65              | 21552     | 21552          | 116(113,60,5  |
|               | ORF3a     | 69            | 69              | 25385     | 25385          | 87(86,12,11,0 |
|               | E         | 69            | 0               | 26237     | 0              | 0             |
|               | M         | 65            | 65              | 26469     | 26469          | 565(557,93,9  |
|               | ORF6      | 69            | 69              | 27041     | 27041          | 545(527,528,  |
|               | ORF7a     | 69            | 69              | 27388     | 27388          | 5(5,1,1,0,0)  |
|               | ORF7b     | 65            | 0               | 27644     | 0              | 0             |
|               | ORF8      | 65            | 65              | 27884     | 27884          | 1(1,0,0,0,0)  |
|               | N         | 65            | 65              | 28256     | 28256          | 5039(4895,45  |
|               | ORF10     | 65            | 0               | 29530     | 0              | 0             |
| Patient3-day1 | S         | 65            | 0               | 21552     | 0              | 0             |
|               | ORF3a     | 69            | 0               | 25385     | 0              | 0             |
|               | E         | 69            | 69              | 26237     | 26237          | 152(143,34,3  |
|               | M         | 65            | 65              | 26469     | 26469          | 266(262,41,4  |
|               | ORF6      | 69            | 69              | 27041     | 27041          | 347(339,325,  |
|               | ORF7a     | 69            | 0               | 27388     | 0              | 0             |
|               | ORF7b     | 65            | 0               | 27644     | 0              | 0             |
|               | ORF8      | 65            | 0               | 27884     | 0              | 0             |
|               | N         | 65            | 65              | 28256     | 28256          | 4666(4535,43  |
|               | ORF10     | 65            | 0               | 29530     | 0              | 0             |
| Patient4-day1 | S         | 65            | 0               | 21552     | 0              | 0             |
|               | ORF3a     | 69            | 0               | 25385     | 0              | 0             |
|               | E         | 69            | 0               | 26237     | 0              | 0             |
|               | M         | 65            | 0               | 26469     | 0              | 0             |
|               | ORF6      | 69            | 69              | 27041     | 27041          | 550(532,531,  |
|               | ORF7a     | 69            | 0               | 27388     | 0              | 0             |
|               | ORF7b     | 65            | 0               | 27644     | 0              | 0             |
|               | ORF8      | 65            | 0               | 27884     | 0              | 0             |
|               | N         | 65            | 65              | 28256     | 28256          | 7(7,6,6,0,0)  |
|               | ORF10     | 65            | 0               | 29530     | 0              | 0             |
|               | S         | 65            | 0               | 21552     | 0              | 0             |
|               | ORF3a     | 69            | 0               | 25385     | 0              | 0             |

|               |       |    |    |       |       |                |
|---------------|-------|----|----|-------|-------|----------------|
| Patient5-day1 | E     | 69 | 69 | 26237 | 26237 | 1(1,1,1,0,0)   |
|               | M     | 65 | 0  | 26469 | 0     | 0              |
|               | ORF6  | 69 | 0  | 27041 | 0     | 0              |
|               | ORF7a | 69 | 0  | 27388 | 0     | 0              |
|               | ORF7b | 65 | 0  | 27644 | 0     | 0              |
|               | ORF8  | 65 | 0  | 27884 | 0     | 0              |
|               | N     | 65 | 65 | 28256 | 28256 | 3635(3513,34)  |
|               | ORF10 | 65 | 0  | 29530 | 0     | 0              |
|               | S     | 65 | 65 | 21552 | 21552 | 383(353,175,   |
|               | ORF3a | 69 | 69 | 25385 | 25385 | 59(57,3,3,0,0) |
| Patient6-day1 | E     | 69 | 69 | 26237 | 26237 | 210(188,33,3   |
|               | M     | 65 | 65 | 26469 | 26469 | 1195(1107,21   |
|               | ORF6  | 69 | 69 | 27041 | 27041 | 770(708,728,   |
|               | ORF7a | 69 | 69 | 27388 | 27388 | 3(3,0,0,0,0)   |
|               | ORF7b | 65 | 0  | 27644 | 0     | 0              |
|               | ORF8  | 65 | 65 | 27884 | 27884 | 1(1,1,1,0,0)   |
|               | N     | 65 | 65 | 28256 | 28256 | 7004(6449,65   |
|               | ORF10 | 65 | 0  | 29530 | 0     | 0              |
|               | S     | 65 | 0  | 21552 | 0     | 0              |
|               | ORF3a | 69 | 0  | 25385 | 0     | 0              |
| Patient6-day3 | E     | 69 | 0  | 26237 | 0     | 0              |
|               | M     | 65 | 65 | 26469 | 26469 | 510(498,109,   |
|               | ORF6  | 69 | 69 | 27041 | 27041 | 182(178,165,   |
|               | ORF7a | 69 | 0  | 27388 | 0     | 0              |
|               | ORF7b | 65 | 0  | 27644 | 0     | 0              |
|               | ORF8  | 65 | 0  | 27884 | 0     | 0              |
|               | N     | 65 | 65 | 28256 | 28256 | 4(4,4,4,0,0)   |
|               | ORF10 | 65 | 0  | 29530 | 0     | 0              |
|               | S     | 65 | 0  | 21552 | 0     | 0              |
|               | ORF3a | 69 | 0  | 25385 | 0     | 0              |
| Patient6-day9 | E     | 69 | 0  | 26237 | 0     | 0              |
|               | M     | 65 | 65 | 26469 | 26469 | 2(2,0,0,0,0)   |
|               | ORF6  | 69 | 0  | 27041 | 0     | 0              |
|               | ORF7a | 69 | 0  | 27388 | 0     | 0              |
|               | ORF7b | 65 | 0  | 27644 | 0     | 0              |
|               | ORF8  | 65 | 0  | 27884 | 0     | 0              |
|               | N     | 65 | 65 | 28256 | 28256 | 13(13,11,11,0  |
|               | ORF10 | 65 | 0  | 29530 | 0     | 0              |
|               | S     | 65 | 65 | 21552 | 21552 | 737(710,333,   |
|               | ORF3a | 69 | 65 | 25385 | 25381 | 50(48,3,3,0,0) |
| Patient7-day1 | E     | 69 | 69 | 26237 | 26237 | 425(407,82,8   |
|               | M     | 65 | 65 | 26469 | 26469 | 421(402,74,7   |
|               | ORF6  | 69 | 69 | 27041 | 27041 | 2(1,1,0,0,0)   |

|               |               |      |    |       |       |              |
|---------------|---------------|------|----|-------|-------|--------------|
| Patient7-day1 | ORF7a         | 69   | 69 | 27388 | 27388 | 1(1,0,0,0,0) |
|               | ORF7b         | 65   | 0  | 27644 | 0     | 0            |
|               | ORF8          | 65   | 0  | 27884 | 0     | 0            |
|               | N             | 65   | 65 | 28256 | 28256 | 7360(7093,68 |
|               | ORF10         | 65   | 0  | 29530 | 0     | 0            |
|               | S             | 65   | 0  | 21552 | 0     | 0            |
|               | ORF3a         | 69   | 0  | 25385 | 0     | 0            |
|               | E             | 69   | 0  | 26237 | 0     | 0            |
|               | M             | 65   | 0  | 26469 | 0     | 0            |
|               | Patient7-day3 | ORF6 | 69 | 69    | 27041 | 27041        |
| ORF7a         |               | 69   | 0  | 27388 | 0     | 0            |
| ORF7b         |               | 65   | 0  | 27644 | 0     | 0            |
| ORF8          |               | 65   | 0  | 27884 | 0     | 0            |
| N             |               | 65   | 65 | 28256 | 28256 | 4395(4275,41 |
| ORF10         |               | 65   | 0  | 29530 | 0     | 0            |
| S             |               | 65   | 0  | 21552 | 0     | 0            |
| ORF3a         |               | 69   | 0  | 25385 | 0     | 0            |
| E             |               | 69   | 69 | 26237 | 26237 | 1(1,0,0,0,0) |
| M             |               | 65   | 0  | 26469 | 0     | 0            |
| Patient7-day5 | ORF6          | 69   | 0  | 27041 | 0     | 0            |
|               | ORF7a         | 69   | 0  | 27388 | 0     | 0            |
|               | ORF7b         | 65   | 0  | 27644 | 0     | 0            |
|               | ORF8          | 65   | 0  | 27884 | 0     | 0            |
|               | N             | 65   | 65 | 28256 | 28256 | 2612(2531,24 |
|               | ORF10         | 65   | 0  | 29530 | 0     | 0            |
|               | S             | 65   | 0  | 21552 | 0     | 0            |
|               | ORF3a         | 69   | 0  | 25385 | 0     | 0            |
|               | E             | 69   | 0  | 26237 | 0     | 0            |
|               | M             | 65   | 65 | 26469 | 26469 | 2(1,0,0,0,0) |
| Patient7-day7 | ORF6          | 69   | 0  | 27041 | 0     | 0            |
|               | ORF7a         | 69   | 0  | 27388 | 0     | 0            |
|               | ORF7b         | 65   | 0  | 27644 | 0     | 0            |
|               | ORF8          | 65   | 0  | 27884 | 0     | 0            |
|               | N             | 65   | 65 | 28256 | 28256 | 4468(4337,42 |
|               | ORF10         | 65   | 0  | 29530 | 0     | 0            |
|               | S             | 65   | 0  | 21552 | 0     | 0            |
|               | ORF3a         | 69   | 0  | 25385 | 0     | 0            |
|               | E             | 69   | 0  | 26237 | 0     | 0            |
|               | M             | 65   | 65 | 26469 | 26469 | 181(179,25,2 |
| Patient8-day1 | ORF6          | 69   | 0  | 27041 | 0     | 0            |
|               | ORF7a         | 69   | 0  | 27388 | 0     | 0            |
|               | ORF7b         | 65   | 0  | 27644 | 0     | 0            |
|               | ORF8          | 65   | 0  | 27884 | 0     | 0            |



|               |       |    |    |       |       |              |
|---------------|-------|----|----|-------|-------|--------------|
|               | N     | 65 | 65 | 28256 | 28256 | 2(2,2,2,0,0) |
|               | ORF10 | 65 | 0  | 29530 | 0     | 0            |
|               | S     | 65 | 65 | 21552 | 21552 | 1(1,0,0,0,0) |
|               | ORF3a | 69 | 0  | 25385 | 0     | 0            |
|               | E     | 69 | 0  | 26237 | 0     | 0            |
|               | M     | 65 | 65 | 26469 | 26469 | 1(1,0,0,0,0) |
| Patient8-day3 | ORF6  | 69 | 69 | 27041 | 27041 | 1(0,1,0,0,0) |
|               | ORF7a | 69 | 0  | 27388 | 0     | 0            |
|               | ORF7b | 65 | 0  | 27644 | 0     | 0            |
|               | ORF8  | 65 | 0  | 27884 | 0     | 0            |
|               | N     | 65 | 65 | 28256 | 28256 | 2(2,2,2,0,0) |
|               | ORF10 | 65 | 0  | 29530 | 0     | 0            |
|               | S     | 65 | 65 | 21552 | 21552 | 322(312,169, |
|               | ORF3a | 69 | 0  | 25385 | 0     | 0            |
|               | E     | 69 | 0  | 26237 | 0     | 0            |
|               | M     | 65 | 0  | 26469 | 0     | 0            |
| Patient8-day9 | ORF6  | 69 | 0  | 27041 | 0     | 0            |
|               | ORF7a | 69 | 0  | 27388 | 0     | 0            |
|               | ORF7b | 65 | 0  | 27644 | 0     | 0            |
|               | ORF8  | 65 | 0  | 27884 | 0     | 0            |
|               | N     | 65 | 65 | 28256 | 28256 | 4373(4213,41 |
|               | ORF10 | 65 | 0  | 29530 | 0     | 0            |

The numbers in the bracket are (reads with left primers, reads with right primers, reads with both primers).  
Normalized count=(Read count/Total number of read mapped on reference genome)\*1000000.

Total number of read mapped on reference genome is 9639, 1095598, 872890, 44932, 153792, 1321.  
“ref\_leader\_end” and “peak\_leader\_end” point to the reference position of the end of leader and the

| peak_normal                                                              | cluster_count | cluster_normalized_count |
|--------------------------------------------------------------------------|---------------|--------------------------|
| 0                                                                        | 0             | 0                        |
| 0                                                                        | 0             | 0                        |
| 0                                                                        | 0             | 0                        |
| 0                                                                        | 0             | 0                        |
| 0                                                                        | 0             | 0                        |
| 0                                                                        | 0             | 0                        |
| 0                                                                        | 0             | 0                        |
| 0                                                                        | 0             | 0                        |
| 46996.58(469.460(454,429, 47722.79(47100.32,44506.69,43884.22,0.00,0.00) |               |                          |
| 0                                                                        | 0             | 0                        |
| 105.88(103.1 116(113,60,5 105.88(103.14,54.76,52.94,0.00,0.00)           |               |                          |
| 79.41(78.50,1118(117,14,1 107.70(106.79,12.78,11.87,0.00,0.00)           |               |                          |
| 0                                                                        | 0             | 0                        |
| 515.70(508.4 581(572,98,9 530.30(522.09,89.45,87.62,0.00,0.00)           |               |                          |
| 497.45(481.0 553(535,535, 504.75(488.32,488.32,471.89,0.00,0.00)         |               |                          |
| 4.56(4.56,0.9 5(5,1,1,0,0) 4.56(4.56,0.91,0.91,0.00,0.00)                |               |                          |
| 0                                                                        | 0             | 0                        |
| 0.91(0.91,0.0 1(1,0,0,0,0) 0.91(0.91,0.00,0.00,0.00,0.00)                |               |                          |
| 4599.31(4467.5167(5021,47 4716.15(4582.89,4299.93,4180.37,0.00,0.00)     |               |                          |
| 0                                                                        | 0             | 0                        |
| 0                                                                        | 0             | 0                        |
| 0                                                                        | 0             | 0                        |
| 174.13(163.8 154(145,35,3 176.43(166.11,40.10,36.66,0.00,0.00)           |               |                          |
| 304.73(300.1 268(264,41,4 307.03(302.44,46.97,45.82,0.00,0.00)           |               |                          |
| 397.53(388.3 352(344,329, 403.26(394.09,376.91,367.74,0.00,0.00)         |               |                          |
| 0                                                                        | 0             | 0                        |
| 0                                                                        | 0             | 0                        |
| 0                                                                        | 0             | 0                        |
| 5345.46(5195.4772(4639,44 5466.90(5314.53,5072.80,4934.18,0.00,0.00)     |               |                          |
| 0                                                                        | 0             | 0                        |
| 0                                                                        | 0             | 0                        |
| 0                                                                        | 0             | 0                        |
| 0                                                                        | 0             | 0                        |
| 0                                                                        | 0             | 0                        |
| 12240.72(118556(538,537, 12374.25(11973.65,11951.39,11573.04,0.00,0.00)  |               |                          |
| 0                                                                        | 0             | 0                        |
| 0                                                                        | 0             | 0                        |
| 0                                                                        | 0             | 0                        |
| 155.79(155.7 8(8,7,7,0,0) 178.05(178.05,155.79,155.79,0.00,0.00)         |               |                          |
| 0                                                                        | 0             | 0                        |
| 0                                                                        | 0             | 0                        |
| 0                                                                        | 0             | 0                        |

6.50(6.50,6.5 1(1,1,1,0,0) 6.50(6.50,6.50,6.50,0.00,0.00)  
 0 0 0  
 0 0 0  
 0 0 0  
 0 0 0  
 0 0 0  
 23635.82(2283722(3600,3524201.52(23408.24,22966.08,22218.32,0.00,0.00)  
 0 0 0  
 289.84(267.1 384(354,175, 290.59(267.89,132.43,121.84,0.00,0.00)  
 44.65(43.14,262(60,3,3,0,0 46.92(45.41,2.27,2.27,0.00,0.00)  
 158.92(142.2 212(190,34,3 160.43(143.78,25.73,24.97,0.00,0.00)  
 904.32(837.7 1226(1136,21927.78(859.68,167.24,154.38,0.00,0.00)  
 582.70(535.7 785(719,741, 594.05(544.11,560.76,512.32,0.00,0.00)  
 2.27(2.27,0.0 3(3,0,0,0,0) 2.27(2.27,0.00,0.00,0.00,0.00)  
 0 0 0  
 0.76(0.76,0.7 1(1,1,1,0,0) 0.76(0.76,0.76,0.76,0.00,0.00)  
 5300.32(48807174(6615,665428.97(5005.94,5040.00,4648.00,0.00,0.00)  
 0 0 0  
 0 0 0  
 0 0 0  
 0 0 0  
 5354.61(5228526(514,113, 5522.60(5396.61,1186.41,1154.92,0.00,0.00)  
 1910.86(1868184(180,167, 1931.86(1889.86,1753.37,1711.38,0.00,0.00)  
 0 0 0  
 0 0 0  
 0 0 0  
 42.00(42.00,42(4,4,4,0,0) 42.00(42.00,42.00,42.00,0.00,0.00)  
 0 0 0  
 0 0 0  
 0 0 0  
 0 0 0  
 30.55(30.55,30(2,0,0,0,0) 30.55(30.55,0.00,0.00,0.00,0.00)  
 0 0 0  
 0 0 0  
 0 0 0  
 0 0 0  
 198.60(198.6 13(13,11,11,0) 198.60(198.60,168.04,168.04,0.00,0.00)  
 0 0 0  
 517.78(498.8 740(712,335, 519.88(500.21,235.35,228.33,0.00,0.00)  
 35.13(33.72,264(62,4,4,0,0 44.96(43.56,2.81,2.81,0.00,0.00)  
 298.58(285.9 434(416,84,8 304.90(292.26,59.01,58.31,0.00,0.00)  
 295.77(282.4 431(412,76,7 302.80(289.45,53.39,51.29,0.00,0.00)  
 1.41(0.70,0.7 2(1,1,0,0,0) 1.41(0.70,0.70,0.00,0.00,0.00)

0.70(0.70,0.0 2(2,1,1,0,0) 1.41(1.41,0.70,0.70,0.00,0.00)

0 0 0

0 0 0

5170.74(4985.7574(7294,7( 5321.08(5124.37,4955.05,4768.18,0.00,0.00)

0 0 0

0 0 0

0 0 0

0 0 0

0 0 0

0.00(0.00,0.0 0(0,0,0,0,0) 0.00(0.00,0.00,0.00,0.00,0.00)

0 0 0

0 0 0

0 0 0

102418.90(954500(4374,42 104865.77(101929.53,98457.31,95777.40,0.00,0.00)

0 0 0

0 0 0

0 0 0

49.89(49.89,( 1(1,0,0,0,0) 49.89(49.89,0.00,0.00,0.00,0.00)

0 0 0

0 0 0

0 0 0

0 0 0

0 0 0

130300.31(122685(2603,25 133941.93(129851.34,127357.08,123466.03,0.00,0.00)

0 0 0

0 0 0

0 0 0

0 0 0

26.36(13.18,( 2(1,0,0,0,0) 26.36(13.18,0.00,0.00,0.00,0.00)

0 0 0

0 0 0

0 0 0

0 0 0

58878.57(5714579(4445,45 60341.31(58575.48,57270.87,55597.29,0.00,0.00)

0 0 0

0 0 0

0 0 0

0 0 0

1514.25(1497186(184,27,2 1556.08(1539.35,225.88,217.52,0.00,0.00)

0 0 0

0 0 0

0 0 0

0 0 0

|                                                                        |                                    |
|------------------------------------------------------------------------|------------------------------------|
| 16.73(16.73,12(2,2,2,0,0)                                              | 16.73(16.73,16.73,16.73,0.00,0.00) |
| 0                                                                      | 0                                  |
| 13.76(13.76,1(1,0,0,0,0)                                               | 13.76(13.76,0.00,0.00,0.00,0.00)   |
| 0                                                                      | 0                                  |
| 0                                                                      | 0                                  |
| 13.76(13.76,1(1,0,0,0,0)                                               | 13.76(13.76,0.00,0.00,0.00,0.00)   |
| 13.76(0.00,1(0,1,0,0,0)                                                | 13.76(0.00,13.76,0.00,0.00,0.00)   |
| 0                                                                      | 0                                  |
| 0                                                                      | 0                                  |
| 0                                                                      | 0                                  |
| 27.52(27.52,2(2,2,2,0,0)                                               | 27.52(27.52,27.52,27.52,0.00,0.00) |
| 0                                                                      | 0                                  |
| 2928.47(2837322(312,169, 2928.47(2837.52,1536.99,1518.80,0.00,0.00)    |                                    |
| 0                                                                      | 0                                  |
| 0                                                                      | 0                                  |
| 0                                                                      | 0                                  |
| 0                                                                      | 0                                  |
| 0                                                                      | 0                                  |
| 0                                                                      | 0                                  |
| 0                                                                      | 0                                  |
| 0                                                                      | 0                                  |
| 39770.82(3834472(4309,4240671.18(39188.76,38952.30,37533.54,0.00,0.00) |                                    |
| 0                                                                      | 0                                  |

mers, same junction on paired reads with at least a primer).

429, 95245, 65459, 1423395, 42912, 20046, 75885, 119531, 72674 and 109955 excluding the maximum position of the end of leader identified in the most common reads (peak count) on the reference









apped reads unpaired, not primary alignment and supplementary alignment.  
ce genome, and “ref\_TRS\_start” and “peak\_TRS\_start” refer to the reference position of the star







t of TRS and the position of the start of TRS identified in the most common reads (peak count) or









1 the reference genome.

|               | subgenome | peak_leader_peak | TRS_start | ACGAAC | ATG_position | 20_leader_sequence |
|---------------|-----------|------------------|-----------|--------|--------------|--------------------|
| Patient1-day1 | N         | 65               | 28256     | yes    | 28274        | ATCTCTTGTA         |
|               | S         | 65               | 21552     | yes    | 21563        | ATCTCTTGTA         |
|               | ORF3a     | 69               | 25385     | yes    | 25393        | CTTGAGATC          |
|               | M         | 65               | 26469     | yes    | 26523        | ATCTCTTGTA         |
| Patient2-day1 | ORF6      | 69               | 27041     | yes    | 27202        | CTTGAGATC          |
|               | ORF7a     | 69               | 27388     | yes    | 27394        | CTTGAGATC          |
|               | ORF8      | 65               | 27884     | yes    | 27894        | ATCTCTTGTA         |
|               | N         | 65               | 28256     | yes    | 28274        | ATCTCTTGTA         |
|               | E         | 69               | 26237     | yes    | 26245        | CTTGAGATC          |
| Patient3-day1 | M         | 65               | 26469     | yes    | 26523        | ATCTCTTGTA         |
|               | ORF6      | 69               | 27041     | yes    | 27202        | CTTGAGATC          |
|               | N         | 65               | 28256     | yes    | 28274        | ATCTCTTGTA         |
| Patient4-day1 | ORF6      | 69               | 27041     | yes    | 27202        | CTTGAGATC          |
|               | N         | 65               | 28256     | yes    | 28274        | ATCTCTTGTA         |
| Patient5-day1 | E         | 69               | 26237     | yes    | 26245        | CTTGAGATC          |
|               | N         | 65               | 28256     | yes    | 28274        | ATCTCTTGTA         |
|               | S         | 65               | 21552     | yes    | 21563        | ATCTCTTGTA         |
|               | ORF3a     | 69               | 25385     | yes    | 25393        | CTTGAGATC          |
| Patient6-day1 | E         | 69               | 26237     | yes    | 26245        | CTTGAGATC          |
|               | M         | 65               | 26469     | yes    | 26523        | ATCTCTTGTA         |
|               | ORF6      | 69               | 27041     | yes    | 27202        | CTTGAGATC          |
|               | ORF7a     | 69               | 27388     | yes    | 27394        | CTTGAGATC          |
|               | ORF8      | 65               | 27884     | yes    | 27894        | ATCTCTTGTA         |
| Patient6-day3 | N         | 65               | 28256     | yes    | 28274        | ATCTCTTGTA         |
|               | M         | 65               | 26469     | yes    | 26523        | ATCTCTTGTA         |
|               | ORF6      | 69               | 27041     | yes    | 27202        | CTTGAGATC          |
|               | N         | 65               | 28256     | yes    | 28274        | ATCTCTTGTA         |
|               | M         | 65               | 26469     | yes    | 26523        | ATCTCTTGTA         |
| Patient6-day9 | N         | 65               | 28256     | yes    | 28274        | ATCTCTTGTA         |
|               | S         | 65               | 21552     | yes    | 21563        | ATCTCTTGTA         |
|               | ORF3a     | 65               | 25381     | yes    | 25393        | ATCTCTTGTA         |
|               | E         | 69               | 26237     | yes    | 26245        | CTTGAGATC          |
|               | M         | 65               | 26469     | yes    | 26523        | ATCTCTTGTA         |
| Patient7-day1 | ORF6      | 69               | 27041     | yes    | 27202        | CTTGAGATC          |
|               | ORF7a     | 69               | 27388     | yes    | 27394        | CTTGAGATC          |
|               | N         | 65               | 28256     | yes    | 28274        | ATCTCTTGTA         |
|               | ORF6      | 69               | 27041     | yes    | 27202        | CTTGAGATC          |
| Patient7-day3 | N         | 65               | 28256     | yes    | 28274        | ATCTCTTGTA         |
|               | E         | 69               | 26237     | yes    | 26245        | CTTGAGATC          |
| Patient7-day5 | N         | 65               | 28256     | yes    | 28274        | ATCTCTTGTA         |
|               | M         | 65               | 26469     | yes    | 26523        | ATCTCTTGTA         |
| Patient7-day7 | N         | 65               | 28256     | yes    | 28274        | ATCTCTTGTA         |

|               |      |    |           |                  |
|---------------|------|----|-----------|------------------|
| Patient8-day1 | M    | 65 | 26469 yes | 26523 ATCTCTTGTA |
|               | N    | 65 | 28256 yes | 28274 ATCTCTTGTA |
|               | S    | 65 | 21552 yes | 21563 ATCTCTTGTA |
| Patient8-day3 | M    | 65 | 26469 yes | 26523 ATCTCTTGTA |
|               | ORF6 | 69 | 27041 yes | 27202 CTTGTAGATC |
|               | N    | 65 | 28256 yes | 28274 ATCTCTTGTA |
| Patient8-day9 | S    | 65 | 21552 yes | 21563 ATCTCTTGTA |
|               | N    | 65 | 28256 yes | 28274 ATCTCTTGTA |

“peak\_leader” and “peak\_TRS\_start” point to the leader-TRS junctions in sheet "known", “ACGAAC”

TRS\_seq first\_orf\_aa  
CTAAACGAAC MSDNGPQNQRNAPRITFGGSPDSTGSNQNNGERSGARSKQRRPQGLPNNTASWFTALTQH  
CTAAACGAAC MFVFLVLLPLVSSQCVNLTRTQLPPAYTNSFTRGVYYPDKVFRSSVLHSTQDFLPFFSNVTW  
ACGAACTT MDLFMRIFTIGTVTLKQGEIKDATPSDFVRATATIPIQASLPFGWLIVGVALLAVFQSASKIITLK  
CTAAACGAAC MADSNGTITVEELKKLLEQWNLVIGFLFLTWCILLQFAYANRNRFLYIIKLIFLWLLWPVTLACF  
ACGAACGCTT MFHLVDFQVTIAEILLIIMRTFKVSIWNLDYIINLIKNLSKSLTENKYSQLDEEQPMEID\*  
ACGAAC MKIILFLALITLATCELYHYQECVRGTTVLLKEPCSSGTYEGNSPFHPLADNKFALTCFSTQFAFA  
CTAAACGAAC MKFLVFLGIITTVAAFHQECSLQSQCTQHQPYYVDDPCPIHFYSKWKYIRVGARKSAPLIELCVDE,  
CTAAACGAAC MSDNGPQNQRNAPRITFGGSPDSTGSNQNNGERSGARSKQRRPQGLPNNTASWFTALTQH  
ACGAACTT MYSFVSEETGLIVNSVLLFLAFVVLLVTLAILTALRLCAYCCNIVNVSLVKPSFYVYSRVKNLNS  
CTAAACGAAC MADSNGTITVEELKKLLEQWNLVIGFLFLTWCILLQFAYANRNRFLYIIKLIFLWLLWPVTLACF  
ACGAACGCTT MFHLVDFQVTIAEILLIIMRTFKVSIWNLDYIINLIKNLSKSLTENKYSQLDEEQPMEID\*  
CTAAACGAAC MSDNGPQNQRNAPRITFGGSPDSTGSNQNNGERSGARSKQRRPQGLPNNTASWFTALTQH  
ACGAACGCTT MFHLVDFQVTIAEILLIIMRTFKVSIWNLDYIINLIKNLSKSLTENKYSQLDEEQPMEID\*  
CTAAACGAAC MSDNGPQNQRNAPRITFGGSPDSTGSNQNNGERSGARSKQRRPQGLPNNTASWFTALTQH  
ACGAACTT MYSFVSEETGLIVNSVLLFLAFVVLLVTLAILTALRLCAYCCNIVNVSLVKPSFYVYSRVKNLNS  
CTAAACGAAC MSDNGPQNQRNAPRITFGGSPDSTGSNQNNGERSGARSKQRRPQGLPNNTASWFTALTQH  
CTAAACGAAC MFVFLVLLPLVSSQCVNLTRTQLPPAYTNSFTRGVYYPDKVFRSSVLHSTQDFLPFFSNVTW  
ACGAACTT MDLFMRIFTIGTVTLKQGEIKDATPSDFVRATATIPIQASLPFGWLIVGVALLAVFQSASKIITLK  
ACGAACTT MYSFVSEETGLIVNSVLLFLAFVVLLVTLAILTALRLCAYCCNIVNVSLVKPSFYVYSRVKNLNS  
CTAAACGAAC MADSNGTITVEELKKLLEQWNLVIGFLFLTWCILLQFAYANRNRFLYIIKLIFLWLLWPVTLACF  
ACGAACGCTT MFHLVDFQVTIAEILLIIMRTFKVSIWNLDYIINLIKNLSKSLTENKYSQLDEEQPMEID\*  
ACGAAC MKIILFLALITLATCELYHYQECVRGTTVLLKEPCSSGTYEGNSPFHPLADNKFALTCFSTQFAFA  
CTAAACGAAC MKFLVFLGIITTVAAFHQECSLQSQCTQHQPYYVDDPCPIHFYSKWKYIRVGARKSAPLIELCVDE,  
CTAAACGAAC MSDNGPQNQRNAPRITFGGSPDSTGSNQNNGERSGARSKQRRPQGLPNNTASWFTALTQH  
CTAAACGAAC MADSNGTITVEELKKLLEQWNLVIGFLFLTWCILLQFAYANRNRFLYIIKLIFLWLLWPVTLACF  
ACGAACGCTT MFHLVDFQVTIAEILLIIMRTFKVSIWNLDYIINLIKNLSKSLTENKYSQLDEEQPMEID\*  
CTAAACGAAC MSDNGPQNQRNAPRITFGGSPDSTGSNQNNGERSGARSKQRRPQGLPNNTASWFTALTQH  
CTAAACGAAC MADSNGTITVEELKKLLEQWNLVIGFLFLTWCILLQFAYANRNRFLYIIKLIFLWLLWPVTLACF  
CTAAACGAAC MSDNGPQNQRNAPRITFGGSPDSTGSNQNNGERSGARSKQRRPQGLPNNTASWFTALTQH  
CTAAACGAAC MFVFLVLLPLVSSQCVNLTRTQLPPAYTNSFTRGVYYPDKVFRSSVLHSTQDFLPFFSNVTW  
ATAACGAAC MDLFMRIFTIGTVTLKQGEIKDATPSDFVRATATIPIQASLPFGWLIVGVALLAVFQSASKIITLK  
ACGAACTT MYSFVSEETGLIVNSVLLFLAFVVLLVTLAILTALRLCAYCCNIVNVSLVKPSFYVYSRVKNLNS  
CTAAACGAAC MADSNGTITVEELKKLLEQWNLVIGFLFLTWCILLQFAYANRNRFLYIIKLIFLWLLWPVTLACF  
ACGAACGCTT MFHLVDFQVTIAEILLIIMRTFKVSIWNLDYIINLIKNLSKSLTENKYSQLDEEQPMEID\*  
ACGAAC MKIILFLALITLATCELYHYQECVRGTTVLLKEPCSSGTYEGNSPFHPLADNKFALTCFSTQFAFA  
CTAAACGAAC MSDNGPQNQRNAPRITFGGSPDSTGSNQNNGERSGARSKQRRPQGLPNNTASWFTALTQH  
ACGAACGCTT MFHLVDFQVTIAEILLIIMRTFKVSIWNLDYIINLIKNLSKSLTENKYSQLDEEQPMEID\*  
CTAAACGAAC MSDNGPQNQRNAPRITFGGSPDSTGSNQNNGERSGARSKQRRPQGLPNNTASWFTALTQH  
ACGAACTT MYSFVSEETGLIVNSVLLFLAFVVLLVTLAILTALRLCAYCCNIVNVSLVKPSFYVYSRVKNLNS  
CTAAACGAAC MSDNGPQNQRNAPRITFGGSPDSTGSNQNNGERSGARSKQRRPQGLPNNTASWFTALTQH  
CTAAACGAAC MADSNGTITVEELKKLLEQWNLVIGFLFLTWCILLQFAYANRNRFLYIIKLIFLWLLWPVTLACF  
CTAAACGAAC MSDNGPQNQRNAPRITFGGSPDSTGSNQNNGERSGARSKQRRPQGLPNNTASWFTALTQH

CTAAACGAAC MADSNGTITVEELKKLLEQWNLVIGFLFTWICLLQFAYANRNRFLYIIKLIFLWLLWPVTLACF  
CTAAACGAAC MSDNGPQNQRNAPRITFGGSPDSTGSNQNNGERSGARSKQRRPQGLPNNTASWFTALTQH  
CTAAACGAAC MFVFLVLLPLVSSQCVNLTRTQLPPAYTNSFTRGVYYPDKVFRSSVLHSTQDLFLPFFSNVTW  
CTAAACGAAC MADSNGTITVEELKKLLEQWNLVIGFLFTWICLLQFAYANRNRFLYIIKLIFLWLLWPVTLACF  
ACGAACGCTT MFHLVDFQVTIAEILLIIMRTFKVSIWNLDYIINLIKNLSKSLTENKYSQLDEEQPMEID\*  
CTAAACGAAC MSDNGPQNQRNAPRITFGGSPDSTGSNQNNGERSGARSKQRRPQGLPNNTASWFTALTQH  
CTAAACGAAC MFVFLVLLPLVSSQCVNLTRTQLPPAYTNSFTRGVYYPDKVFRSSVLHSTQDLFLPFFSNVTW  
CTAAACGAAC MSDNGPQNQRNAPRITFGGSPDSTGSNQNNGERSGARSKQRRPQGLPNNTASWFTALTQH  
indicates if there is a ACGAAC sequence in the "TRS\_seq" (TRS sequences), "20\_leader\_seq" refe

GKEDLKFRGQGVPIINTNSSPDDQIGYYRRATRRIRGGDGKMKDLSRWYFYLLGTGPEAGLPYGANKDGIIM  
/FHAIHVSGTNGTKRFDNPVLPFNDGVYFASTEKSNIIRGWIFGTTLDSTQSLIVNNATNVVIVKCEFCNDI  
:KRWQLALSKGVHFCNLLLLFVTVYSHLLLVAAGLEAPFLYLYALVYFLQSFVRIIMRLWLCWKCRSKNPLLYI  
VLAAYRINWITGGIAIAMAACLVLGMWLSYFIASFRLFARTRSMWSFNPNETNILLNVPLHGTILTRPPLLESELVIG

.CPDGVKHVYQLRARSVSPKLFIRQEEVQELYSPIFLIVAAIVFITLCFTLKRKTE\*  
AGSKSPIQYIDIGNYTVSCLPFTINCQEPKLGSLVVRCSFYEDFLEYHDVRVLDVI\*  
GKEDLKFRGQGVPIINTNSSPDDQIGYYRRATRRIRGGDGKMKDLSRWYFYLLGTGPEAGLPYGANKDGIIM  
;SRVPDLLV\*  
VLAAYRINWITGGIAIAMAACLVLGMWLSYFIASFRLFARTRSMWSFNPNETNILLNVPLHGTILTRPPLLESELVIG

GKEDLKFRGQGVPIINTNSSPDDQIGYYRRATRRIRGGDGKMKDLSRWYFYLLGTGPEAGLPYGANKDGIIM

GKEDLKFRGQGVPIINTNSSPDDQIGYYRRATRRIRGGDGKMKDLSRWYFYLLGTGPEAGLPYGANKDGIIM  
;SRVPDLLV\*  
GKEDLKFRGQGVPIINTNSSPDDQIGYYRRATRRIRGGDGKMKDLSRWYFYLLGTGPEAGLPYGANKDGIIM  
/FHAIHVSGTNGTKRFDNPVLPFNDGVYFASTEKSNIIRGWIFGTTLDSTQSLIVNNATNVVIVKCEFCNDI  
:KRWQLALSKGVHFCNLLLLFVTVYSHLLLVAAGLEAPFLYLYALVYFLQSFVRIIMRLWLCWKCRSKNPLLYI  
;SRVPDLLV\*  
VLAAYRINWITGGIAIAMAACLVLGMWLSYFIASFRLFARTRSMWSFNPNETNILLNVPLHGTILTRPPLLESELVIG

.CPDGVKHVYQLRARSVSPKLFIRQEEVQELYSPIFLIVAAIVFITLCFTLKRKTE\*  
AGSKSPIQYIDIGNYTVSCLPFTINCQEPKLGSLVVRCSFYEDFLEYHDVRVLDVI\*  
GKEDLKFRGQGVPIINTNSSPDDQIGYYRRATRRIRGGDGKMKDLSRWYFYLLGTGPEAGLPYGANKDGIIM  
VLAAYRINWITGGIAIAMAACLVLGMWLSYFIASFRLFARTRSMWSFNPNETNILLNVPLHGTILTRPPLLESELVIG

GKEDLKFRGQGVPIINTNSSPDDQIGYYRRATRRIRGGDGKMKDLSRWYFYLLGTGPEAGLPYGANKDGIIM  
VLAAYRINWITGGIAIAMAACLVLGMWLSYFIASFRLFARTRSMWSFNPNETNILLNVPLHGTILTRPPLLESELVIG  
GKEDLKFRGQGVPIINTNSSPDDQIGYYRRATRRIRGGDGKMKDLSRWYFYLLGTGPEAGLPYGANKDGIIM  
/FHAIHVSGTNGTKRFDNPVLPFNDGVYFASTEKSNIIRGWIFGTTLDSTQSLIVNNATNVVIVKCEFCNDI  
:KRWQLALSKGVHFCNLLLLFVTVYSHLLLVAAGLEAPFLYLYALVYFLQSFVRIIMRLWLCWKCRSKNPLLYI  
;SRVPDLLV\*  
VLAAYRINWITGGIAIAMAACLVLGMWLSYFIASFRLFARTRSMWSFNPNETNILLNVPLHGTILTRPPLLESELVIG

.CPDGVKHVYQLRARSVSPKLFIRQEEVQELYSPIFLIVAAIVFITLCFTLKRKTE\*  
GKEDLKFRGQGVPIINTNSSPDDQIGYYRRATRRIRGGDGKMKDLSRWYFYLLGTGPEAGLPYGANKDGIIM

GKEDLKFRGQGVPIINTNSSPDDQIGYYRRATRRIRGGDGKMKDLSRWYFYLLGTGPEAGLPYGANKDGIIM  
;SRVPDLLV\*  
GKEDLKFRGQGVPIINTNSSPDDQIGYYRRATRRIRGGDGKMKDLSRWYFYLLGTGPEAGLPYGANKDGIIM  
VLAAYRINWITGGIAIAMAACLVLGMWLSYFIASFRLFARTRSMWSFNPNETNILLNVPLHGTILTRPPLLESELVIG  
GKEDLKFRGQGVPIINTNSSPDDQIGYYRRATRRIRGGDGKMKDLSRWYFYLLGTGPEAGLPYGANKDGIIM

VLAAYRINWITGGIAIAMAACLVGLMWLSYFIASFRLFARTRSMWSFNPETNILLNVPLHGTILTRP LLESELVIG  
GKEDLKFPRGQGVPI NTNSSPDDQIGYYRRATRRIRGGDGKMKDLSR WYFYLLGTGPEAGLPYGANKDGIIM  
/FHAIHVSGTNGTKRFDNPVLPFNDGVYFASTEKSNIIRGWIFGTTLDSKTQSL LIVNNATNVVIKVCEFQFCNDF  
VLAAYRINWITGGIAIAMAACLVGLMWLSYFIASFRLFARTRSMWSFNPETNILLNVPLHGTILTRP LLESELVIG

GKEDLKFPRGQGVPI NTNSSPDDQIGYYRRATRRIRGGDGKMKDLSR WYFYLLGTGPEAGLPYGANKDGIIM  
/FHAIHVSGTNGTKRFDNPVLPFNDGVYFASTEKSNIIRGWIFGTTLDSKTQSL LIVNNATNVVIKVCEFQFCNDF  
GKEDLKFPRGQGVPI NTNSSPDDQIGYYRRATRRIRGGDGKMKDLSR WYFYLLGTGPEAGLPYGANKDGIIM  
ers to the 20 nucleotides before the end of leader, and "AUG\_ postion" and "first\_ orf\_ aa" refer to

/VATEGALNTPKDHIGTRNPANNAIVLQLPQGTTLPKGFYAEGSRGGSQASSRSSSRN SSRN STPGSSRG T:  
PFLGVVYHKNNKSWMESEFRVYSSANNCTFEYVSQPFLMDLEGKQGNFKNLREFVFKNIDGYFKIYSKHTPINL  
DANYFLCWHTNCYDYCIPYNSVTSSIVITSGDGTTSPISEHDYQIGGYTEKWESGVKDCVVLHSYFTSDYYQLYST  
AVILRGHLRIAGHHLGRCDIKDLPKEITVATSRTLSYYKLGASQRVAGDSGFAAYSRYRIGNYKLNTDHSSSDNI

/VATEGALNTPKDHIGTRNPANNAIVLQLPQGTTLPKGFYAEGSRGGSQASSRSSSRN SSRN STPGSSRG T:

AVILRGHLRIAGHHLGRCDIKDLPKEITVATSRTLSYYKLGASQRVAGDSGFAAYSRYRIGNYKLNTDHSSSDNI

/VATEGALNTPKDHIGTRNPANNAIVLQLPQGTTLPKGFYAEGSRGGSQASSRSSSRN SSRN STPGSSRG T:

/VATEGALNTPKDHIGTRNPANNAIVLQLPQGTTLPKGFYAEGSRGGSQASSRSSSRN SSRN STPGSSRG T:

/VATEGALNTPKDHIGTRNPANNAIVLQLPQGTTLPKGFYAEGSRGGSQASSRSSSRN SSRN STPGSSRG T:  
PFLGVVYHKNNKSWMESEFRVYSSANNCTFEYVSQPFLMDLEGKQGNFKNLREFVFKNIDGYFKIYSKHTPINL  
DANYFLCWHTNCYDYCIPYNSVTSSIVITSGDGTTSPISEHDYQIGGYTEKWESGVKDCVVLHSYFTSDYYQLYST

AVILRGHLRIAGHHLGRCDIKDLPKEITVATSRTLSYYKLGASQRVAGDSGFAAYSRYRIGNYKLNTDHSSSDNI

/VATEGALNTPKDHIGTRNPANNAIVLQLPQGTTLPKGFYAEGSRGGSQASSRSSSRN SSRN STPGSSRG T:

AVILRGHLRIAGHHLGRCDIKDLPKEITVATSRTLSYYKLGASQRVAGDSGFAAYSRYRIGNYKLNTDHSSSDNI

/VATEGALNTPKDHIGTRNPANNAIVLQLPQGTTLPKGFYAEGSRGGSQASSRSSSRN SSRN STPGSSRG T:

AVILRGHLRIAGHHLGRCDIKDLPKEITVATSRTLSYYKLGASQRVAGDSGFAAYSRYRIGNYKLNTDHSSSDNI

/VATEGALNTPKDHIGTRNPANNAIVLQLPQGTTLPKGFYAEGSRGGSQASSRSSSRN SSRN STPGSSRG T:

PFLGVVYHKNNKSWMESEFRVYSSANNCTFEYVSQPFLMDLEGKQGNFKNLREFVFKNIDGYFKIYSKHTPINL  
DANYFLCWHTNCYDYCIPYNSVTSSIVITSGDGTTSPISEHDYQIGGYTEKWESGVKDCVVLHSYFTSDYYQLYST

AVILRGHLRIAGHHLGRCDIKDLPKEITVATSRTLSYYKLGASQRVAGDSGFAAYSRYRIGNYKLNTDHSSSDNI

/VATEGALNTPKDHIGTRNPANNAIVLQLPQGTTLPKGFYAEGSRGGSQASSRSSSRN SSRN STPGSSRG T:

/VATEGALNTPKDHIGTRNPANNAIVLQLPQGTTLPKGFYAEGSRGGSQASSRSSSRN SSRN STPGSSRG T:

/VATEGALNTPKDHIGTRNPANNAIVLQLPQGTTLPKGFYAEGSRGGSQASSRSSSRN SSRN STPGSSRG T:

AVILRGHLRIAGHHLGRCDIKDLPKEITVATSRTLSYYKLGASQRVAGDSGFAAYSRYRIGNYKLNTDHSSSDNI

/VATEGALNTPKDHIGTRNPANNAIVLQLPQGTTLPKGFYAEGSRGGSQASSRSSSRN SSRN STPGSSRG T:



AVILRGHLRIAGHHLGRCDIKDLPKEITVATSRTLSTYKLGASQRVAGDSGFAAYSRYRIGNYKLNTDHSSSDNI  
/VATEGALNTPKDHIGTRNPANNAIVLQLPQGTTLPKGFYAEGSRGGSQASSRSSSRN SSRN STPGSSRG:  
PFLGVYYHKNNKSWMESEFRVYSSANNCTFEYVSQPFLMDLEGKQGNFKNLREFVFKNIDGYFKIYSKHTPINL  
AVILRGHLRIAGHHLGRCDIKDLPKEITVATSRTLSTYKLGASQRVAGDSGFAAYSRYRIGNYKLNTDHSSSDNI

/VATEGALNTPKDHIGTRNPANNAIVLQLPQGTTLPKGFYAEGSRGGSQASSRSSSRN SSRN STPGSSRG:  
PFLGVYYHKNNKSWMESEFRVYSSANNCTFEYVSQPFLMDLEGKQGNFKNLREFVFKNIDGYFKIYSKHTPINL  
/VATEGALNTPKDHIGTRNPANNAIVLQLPQGTTLPKGFYAEGSRGGSQASSRSSSRN SSRN STPGSSRG:  
o the first AUG position and translated orf of the sgmRNA.

SPARMAGNGGDAALALLLDRLNQLESKMSGKGQQQQGQTVTKKSAAEASKKPRQKRTATKAYNVTQAFGI  
VRDLPQGFSALEPLVDLPIGINITRFQTLALHRSYLTPGDSSSGWTAGAAAYVGYLQPRTFLLKYNENGTITDA  
[QLSTDTGVEHVTFEYFNKIVDEPEEHVQIHTIDGSSGVVNPVMEPIYDEPTTTTSVPL\*  
ALLVQ\*

SPARMAGNGGDAALALLLDRLNQLESKMSGKGQQQQGQTVTKKSAAEASKKPRQKRTATKAYNVTQAFGI  
ALLVQ\*

SPARMAGNGGDAALALLLDRLNQLESKMSGKGQQQQGQTVTKKSAAEASKKPRQKRTATKAYNVTQAFGI

SPARMAGNGGDAALALLLDRLNQLESKMSGKGQQQQGQTVTKKSAAEASKKPRQKRTATKAYNVTQAFGI

SPARMAGNGGDAALALLLDRLNQLESKMSGKGQQQQGQTVTKKSAAEASKKPRQKRTATKAYNVTQAFGI  
VRDLPQGFSALEPLVDLPIGINITRFQTLALHRSYLTPGDSSSGWTAGAAAYVGYLQPRTFLLKYNENGTITDA  
[QLSTDTGVEHVTFEYFNKIVDEPEEHVQIHTIDGSSGVVNPVMEPIYDEPTTTTSVPL\*

ALLVQ\*

SPARMAGNGGDAALALLLDRLNQLESKMSGKGQQQQGQTVTKKSAAEASKKPRQKRTATKAYNVTQAFGI  
ALLVQ\*

SPARMAGNGGDAALALLLDRLNQLESKMSGKGQQQQGQTVTKKSAAEASKKPRQKRTATKAYNVTQAFGI  
ALLVQ\*

SPARMAGNGGDAALALLLDRLNQLESKMSGKGQQQQGQTVTKKSAAEASKKPRQKRTATKAYNVTQAFGI  
VRDLPQGFSALEPLVDLPIGINITRFQTLALHRSYLTPGDSSSGWTAGAAAYVGYLQPRTFLLKYNENGTITDA  
[QLSTDTGVEHVTFEYFNKIVDEPEEHVQIHTIDGSSGVVNPVMEPIYDEPTTTTSVPL\*

ALLVQ\*

SPARMAGNGGDAALALLLDRLNQLESKMSGKGQQQQGQTVTKKSAAEASKKPRQKRTATKAYNVTQAFGI

SPARMAGNGGDAALALLLDRLNQLESKMSGKGQQQQGQTVTKKSAAEASKKPRQKRTATKAYNVTQAFGI

SPARMAGNGGDAALALLLDRLNQLESKMSGKGQQQQGQTVTKKSAAEASKKPRQKRTATKAYNVTQAFGI  
ALLVQ\*

SPARMAGNGGDAALALLLDRLNQLESKMSGKGQQQQGQTVTKKSAAEASKKPRQKRTATKAYNVTQAFGI

ALLVQ\*

SPARMAGNGGDAALALLLDRLNQLESKMSGKGQQQQGQTVTKKSAEASKKPRQKRTATKAYNVTQAFGI  
VRDLPQGFSALEPLVDLPIGINITRFQTLALHRSYLTPGDSSSGWTAGAAAYVGYLQPRTFLLKYNENGTITDA  
ALLVQ\*

SPARMAGNGGDAALALLLDRLNQLESKMSGKGQQQQGQTVTKKSAEASKKPRQKRTATKAYNVTQAFGI  
VRDLPQGFSALEPLVDLPIGINITRFQTLALHRSYLTPGDSSSGWTAGAAAYVGYLQPRTFLLKYNENGTITDA  
SPARMAGNGGDAALALLLDRLNQLESKMSGKGQQQQGQTVTKKSAEASKKPRQKRTATKAYNVTQAFGI

RRGPEQTQGNFGDQELIRQGTDYKHWPQIAQFAPSASAFFGMSRIGMEVTPSGTWLTYTGAIKLDDKDPNFK  
AVDCALDPLSETKCTLKSFTVEKGIYQTSNFRVQPTESIVRFPNITNLCPFGEVFNATRFASVYAWNRKRISNCVA

RRGPEQTQGNFGDQELIRQGTDYKHWPQIAQFAPSASAFFGMSRIGMEVTPSGTWLTYTGAIKLDDKDPNFK

RRGPEQTQGNFGDQELIRQGTDYKHWPQIAQFAPSASAFFGMSRIGMEVTPSGTWLTYTGAIKLDDKDPNFK

RRGPEQTQGNFGDQELIRQGTDYKHWPQIAQFAPSASAFFGMSRIGMEVTPSGTWLTYTGAIKLDDKDPNFK

RRGPEQTQGNFGDQELIRQGTDYKHWPQIAQFAPSASAFFGMSRIGMEVTPSGTWLTYTGAIKLDDKDPNFK  
AVDCALDPLSETKCTLKSFTVEKGIYQTSNFRVQPTESIVRFPNITNLCPFGEVFNATRFASVYAWNRKRISNCVA

RRGPEQTQGNFGDQELIRQGTDYKHWPQIAQFAPSASAFFGMSRIGMEVTPSGTWLTYTGAIKLDDKDPNFK

RRGPEQTQGNFGDQELIRQGTDYKHWPQIAQFAPSASAFFGMSRIGMEVTPSGTWLTYTGAIKLDDKDPNFK

RRGPEQTQGNFGDQELIRQGTDYKHWPQIAQFAPSASAFFGMSRIGMEVTPSGTWLTYTGAIKLDDKDPNFK  
AVDCALDPLSETKCTLKSFTVEKGIYQTSNFRVQPTESIVRFPNITNLCPFGEVFNATRFASVYAWNRKRISNCVA

RRGPEQTQGNFGDQELIRQGTDYKHWPQIAQFAPSASAFFGMSRIGMEVTPSGTWLTYTGAIKLDDKDPNFK

RRGPEQTQGNFGDQELIRQGTDYKHWPQIAQFAPSASAFFGMSRIGMEVTPSGTWLTYTGAIKLDDKDPNFK

RRGPEQTQGNFGDQELIRQGTDYKHWPQIAQFAPSASAFFGMSRIGMEVTPSGTWLTYTGAIKLDDKDPNFK

RRGPEQTQGNFGDQELIRQGTDYKHWPQIAQFAPSASAFFGMSRIGMEVTPSGTWLTYTGAIKLDDKDPNFK

RRGPEQTQGNFGDQELIRQGTDYKHWPQIAQFAPSASAFFGMSRIGMEVTPSGTWLTYTGAIKLDDKDPNFK  
AVDCALDPLSEKCTKLSFTVEKGIYQTSNFRVQPTESIVRFPNITNLCPFGEVFNATRFASVYAWNRKRISNCVA

RRGPEQTQGNFGDQELIRQGTDYKHWPQIAQFAPSASAFFGMSRIGMEVTPSGTWLTYTGAIKLDDKDPNFK  
AVDCALDPLSEKCTKLSFTVEKGIYQTSNFRVQPTESIVRFPNITNLCPFGEVFNATRFASVYAWNRKRISNCVA  
RRGPEQTQGNFGDQELIRQGTDYKHWPQIAQFAPSASAFFGMSRIGMEVTPSGTWLTYTGAIKLDDKDPNFK

{DQVILLNKHIDAYKTFPPTEPKKDKKKKKADETQALPQRQKKQQTVTLLPAADLDDFSKQLQQSMSSADSTQA³  
DYSVLYNSASFSTFKCYGVSPTKLNDLCFTNVYADSFVIRGDEVQRQIAPGQTGKIADYNYKLPDDFTGCVIAWN:

{DQVILLNKHIDAYKTFPPTEPKKDKKKKKADETQALPQRQKKQQTVTLLPAADLDDFSKQLQQSMSSADSTQA³

{DQVILLNKHIDAYKTFPPTEPKKDKKKKKADETQALPQRQKKQQTVTLLPAADLDDFSKQLQQSMSSADSTQA³

{DQVILLNKHIDAYKTFPPTEPKKDKKKKKADETQALPQRQKKQQTVTLLPAADLDDFSKQLQQSMSSADSTQA³

{DQVILLNKHIDAYKTFPPTEPKKDKKKKKADETQALPQRQKKQQTVTLLPAADLDDFSKQLQQSMSSADSTQA³  
DYSVLYNSASFSTFKCYGVSPTKLNDLCFTNVYADSFVIRGDEVQRQIAPGQTGKIADYNYKLPDDFTGCVIAWN:

{DQVILLNKHIDAYKTFPPTEPKKDKKKKKADETQALPQRQKKQQTVTLLPAADLDDFSKQLQQSMSSADSTQA³

{DQVILLNKHIDAYKTFPPTEPKKDKKKKKADETQALPQRQKKQQTVTLLPAADLDDFSKQLQQSMSSADSTQA³

{DQVILLNKHIDAYKTFPPTEPKKDKKKKKADETQALPQRQKKQQTVTLLPAADLDDFSKQLQQSMSSADSTQA³  
DYSVLYNSASFSTFKCYGVSPTKLNDLCFTNVYADSFVIRGDEVQRQIAPGQTGKIADYNYKLPDDFTGCVIAWN:

{DQVILLNKHIDAYKTFPPTEPKKDKKKKKADETQALPQRQKKQQTVTLLPAADLDDFSKQLQQSMSSADSTQA³

{DQVILLNKHIDAYKTFPPTEPKKDKKKKKADETQALPQRQKKQQTVTLLPAADLDDFSKQLQQSMSSADSTQA³

{DQVILLNKHIDAYKTFPPTEPKKDKKKKKADETQALPQRQKKQQTVTLLPAADLDDFSKQLQQSMSSADSTQA³

{DQVILLNKHIDAYKTFPPTEPKKDKKKKKADETQALPQRQKKQQTVTLLPAADLDDFSKQLQQSMSSADSTQA³

{DQVILLNKHIDAYKTFPPTEPKKDKKKKADETQALPQRQKKQQTVTLLPAADLDDFSKQLQQSMSSADSTQA}  
DYSVLYNSASFSTFKCYGVSPKLNLCFTNVYADSFVIRGDEVQRQIAPGQTGKIADYNYKLPDDFTGCVIAWN!

{DQVILLNKHIDAYKTFPPTEPKKDKKKKADETQALPQRQKKQQTVTLLPAADLDDFSKQLQQSMSSADSTQA}  
DYSVLYNSASFSTFKCYGVSPKLNLCFTNVYADSFVIRGDEVQRQIAPGQTGKIADYNYKLPDDFTGCVIAWN!  
{DQVILLNKHIDAYKTFPPTEPKKDKKKKADETQALPQRQKKQQTVTLLPAADLDDFSKQLQQSMSSADSTQA}

\*

SNNLDSKVGGNYNYLYRLFRKSNLKPFERDISTEIYQAGSTPCNGVEGFNCYFPLQSYGFQPTNGVGYQPVRVV

\*

\*

\*

\*

SNNLDSKVGGNYNYLYRLFRKSNLKPFERDISTEIYQAGSTPCNGVEGFNCYFPLQSYGFQPTNGVGYQPVRVV

\*

\*

\*

SNNLDSKVGGNYNYLYRLFRKSNLKPFERDISTEIYQAGSTPCNGVEGFNCYFPLQSYGFQPTNGVGYQPVRVV

\*

\*

\*

\*



\*

SNNLDSKVGGNYNYLYRLFRKSNLKPFERDISTEIYQAGSTPCNGVEGFNCYFPLQSYGFQPTNGVGYQPVRV

\*

SNNLDSKVGGNYNYLYRLFRKSNLKPFERDISTEIYQAGSTPCNGVEGFNCYFPLQSYGFQPTNGVGYQPVRV

\*

'VLSFELLHAPATVCGPKKSTNLVKNKCVNFNFNGLTGTGVLTESNKKFLPFQQFGRDIADTTDAVRDPQTLEILI

'VLSFELLHAPATVCGPKKSTNLVKNKCVNFNFNGLTGTGVLTESNKKFLPFQQFGRDIADTTDAVRDPQTLEILI

'VLSFELLHAPATVCGPKKSTNLVKNKCVNFNFNGLTGTGVLTESNKKFLPFQQFGRDIADTTDAVRDPQTLEILI

'VLSFELLHAPATVCGPKKSTNLVKNKCVNFNFNGLTGTGVLTESNKKFLPFQQFGRDIADTTDAVRDPQTLEILI

'VLSFELLHAPATVCGPKKSTNLVKNKCVNFNFNGLTGTGVLTESNKKFLPFQQFGRDIADTTDAVRDPQTLEILI

DITPCSFGGVSVITPGTNTSNQVAVLYQDVNCTEVPVAIHADQLTPTWRVYSTGSNVFQTRAGCLIGAEHVNN

DITPCSFGGVSVITPGTNTSNQVAVLYQDVNCTEVPVAIHADQLTPTWRVYSTGSNVFQTRAGCLIGAEHVNN

DITPCSFGGVSVITPGTNTSNQVAVLYQDVNCTEVPVAIHADQLTPTWRVYSTGSNVFQTRAGCLIGAEHVNN

DITPCSFGGVSVITPGTNTSNQVAVLYQDVNCTEVPVAIHADQLTPTWRVYSTGSNVFQTRAGCLIGAEHVNN

DITPCSFGGVSVITPGTNTSNQVAVLYQDVNCTEVPVAIHADQLTPTWRVYSTGSNVFQTRAGCLIGAEHVNN

ISYECDIPIGAGICASYQTQTNSPRRARSVASQSIAYTMSLGAENSVAYSNNSIAIPTNFTISVTTEILPVSMTKTS'

ISYECDIPIGAGICASYQTQTNSPRRARSVASQSIAYTMSLGAENSVAYSNNSIAIPTNFTISVTTEILPVSMTKTS'

ISYECDIPIGAGICASYQTQTNSPRRARSVASQSIAYTMSLGAENSVAYSNNSIAIPTNFTISVTTEILPVSMTKTS'

ISYECDIPIGAGICASYQTQTNSPRRARSVASQSIIAYTMSLGAENSVAYSNNSIAIPTNFTISVTTEILPVSMTKTS

ISYECDIPIGAGICASYQTQTNSPRRARSVASQSIIAYTMSLGAENSVAYSNNSIAIPTNFTISVTTEILPVSMTKTS

VDCTMYICGDSTECSNLLLQYGSFCTQLNRALTGIAVEQDKNTQEVFAQVKQIYKTPPIKDFGGFNFSQILPDPS

VDCTMYICGDSTECSNLLLQYGSFCTQLNRALTGIAVEQDKNTQEVFAQVKQIYKTPPIKDFGGFNFSQILPDPS

VDCTMYICGDSTECSNLLLQYGSFCTQLNRALTGIAVEQDKNTQEVFAQVKQIYKTPPIKDFGGFNFSQILPDPS



VDCTMYICGDSTECSNLLLQYGSFCTQLNRALTGIAVEQDKNTQEVFAQVKQIYKTPPIKDFGGFNFSQILPDPS

VDCTMYICGDSTECSNLLLQYGSFCTQLNRALTGIAVEQDKNTQEVFAQVKQIYKTPPIKDFGGFNFSQILPDPS

KPSKRSFIEDLLFNKVTLADAGFIKQYGDCLGDIAARDLICAQKFNGLTVLPPLTDEMIAQYTSALLAGTITSGW

KPSKRSFIEDLLFNKVTLADAGFIKQYGDCLGDIAARDLICAQKFNGLTVLPPLTDEMIAQYTSALLAGTITSGW

KPSKRSFIEDLLFNKVTLADAGFIKQYGDCLGDIAARDLICAQKFNGLTVLPPLTDEMIAQYTSALLAGTITSGW

KPSKRSFIEDLLFNKVTLADAGFIKQYGDCLGDIAARDLICAQKFNGLTVLPPLTDEMIAQYTSALLAGTITSGW

KPSKRSFIEDLLFNKVTLADAGFIKQYGDCLGDIAARDLICAQKFNGLTVLPPLTDEMIAQYTSALLAGTITSGW

'TFGAGAALQIPFAMQMAYRFNGIGVTQNVLYENQKLIANQFNSAIGKIQDSLSSTASALGKLQDVVNQNAQ/

'TFGAGAALQIPFAMQMAYRFNGIGVTQNVLYENQKLIANQFNSAIGKIQDSLSSTASALGKLQDVVNQNAQ/

'TFGAGAALQIPFAMQMAYRFNGIGVTQNVLYENQKLIANQFNSAIGKIQDSLSSTASALGKLQDVVNQNAQ/

'TFGAGAALQIPFAMQMAYRFNGIGVTQNVLYENQKLIANQFNSAIGKIQDLSSTASALGKLQDVVNQNAQ/

'TFGAGAALQIPFAMQMAYRFNGIGVTQNVLYENQKLIANQFNSAIGKIQDLSSTASALGKLQDVVNQNAQ/

ALNTLVKQLSSNFGAISSVLNDILSRDKVEAEVQIDRLITGRLQSLQTYVTQQLIRAAEIRASANL

ALNTLVKQLSSNFGAISSVLNDILSRDKVEAEVQIDRLITGRLQSLQTYVTQQLIRAAEIRASANL

ALNTLVKQLSSNFGAISSVLNDILSRDKVEAEVQIDRLITGRLQSLQTYVTQQLIRAAEIRASANL

ALNTLVKQLSSNFGAISSVLNDILSRDKVEAEVQIDRLITGRLQSLQTYVTQQLIRAAEIRASANL

ALNTLVKQLSSNFGAISSVLNDILSRDKVEAEVQIDRLITGRLQSLQTYVTQQLIRAAEIRASANL

|               | subgenome | leader_end | TRS_start | nb_count            | normalized_count             |
|---------------|-----------|------------|-----------|---------------------|------------------------------|
| Patient1-day1 |           |            |           |                     |                              |
| Patient2-day1 |           |            |           |                     |                              |
| Patient3-day1 |           |            |           |                     |                              |
| Patient4-day1 |           |            |           |                     |                              |
| Patient5-day1 |           |            |           |                     |                              |
| Patient6-day1 | 1         | 74         | 21055     | 19(19,18,18,0)      | 14.38(14.38,13.62,13.62,0.0) |
| Patient6-day3 |           |            |           |                     |                              |
| Patient6-day9 |           |            |           |                     |                              |
| Patient7-day1 | 1         | 65         | 5080      | 200(192,180,140.51) | 134.89,126.46,120.1          |
| Patient7-day3 |           |            |           |                     |                              |
| Patient7-day5 |           |            |           |                     |                              |
| Patient7-day7 |           |            |           |                     |                              |
| Patient8-day1 |           |            |           |                     |                              |
| Patient8-day3 |           |            |           |                     |                              |
| Patient8-day9 |           |            |           |                     |                              |

The numbers in the bracket are (reads with left primers, reads with right primers, reads with both primers).  
Normalized count=(Read count/Total number of read mapped on reference genome)\*1000000.  
Total number of read mapped on reference genome is 9639, 1095598, 872890, 44932, 153792, 13214.  
“leader\_end” and “TRS\_start” refer to the position of the end of leader and the position of the start of



00,0.00)

84,0.00,0.00)

ers, same junction on paired reads with at least a primer).

29, 95245, 65459, 1423395, 42912, 20046, 75885, 119531, 72674 and 109955 excluding the map  
TRs identified in the reads >10.

mped reads unpaired, not primary alignment and supplementary alignment.

|               | subgenome | leader_end | TRS_start | ACGAAC | ATG_postion | known_ATG |
|---------------|-----------|------------|-----------|--------|-------------|-----------|
| Patient1-day1 |           |            |           |        |             |           |
| Patient2-day1 |           |            |           |        |             |           |
| Patient3-day1 |           |            |           |        |             |           |
| Patient4-day1 |           |            |           |        |             |           |
| Patient5-day1 |           |            |           |        |             |           |
| Patient6-day1 | 1         | 74         | 21055     | no     | 21071       | -         |
| Patient6-day3 |           |            |           |        |             |           |
| Patient6-day9 |           |            |           |        |             |           |
| Patient7-day1 | 1         | 65         | 5080      | no     | 5103        | -         |
| Patient7-day3 |           |            |           |        |             |           |
| Patient7-day5 |           |            |           |        |             |           |
| Patient7-day7 |           |            |           |        |             |           |
| Patient8-day1 |           |            |           |        |             |           |
| Patient8-day3 |           |            |           |        |             |           |
| Patient8-day9 |           |            |           |        |             |           |

“peak\_leader” and “peak\_TRS\_start” point to the leader-TRS junctions in sheet "novel", “ACGAAC”

20\_leader\_seq TRS\_seq first\_orf\_aa

AGATCTGTTC GACCCTAAG<sup>†</sup> MLQKKMTLKRVSLSLTFVGLYNKS\*

ATCTCTTGTA<sup>†</sup> TAAAATAAAA<sup>†</sup> MKVKHFMYLMMTLVLRLLSTTTQLILVFWVGCQH\*

<sup>†</sup> indicates if there is a ACGAAC sequences in the “TRS\_seq” (TRS sequences), “20\_leader\_seq” re

fers to the 20 sequences before the end of the leader, "AUG\_postion" and "first\_orf\_aa" refer to

› the first AUG position and translated orf of the sgRNA, and “known\_ATG” indicates if the first

AUG position is the same as a known sgRNA.

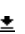

| subgenome         | peak_leader | peak_TRS_start | ACGAAC | ATG_position | known_ATG |
|-------------------|-------------|----------------|--------|--------------|-----------|
| Shared by all     | 48          | 26443          | yes    | 26523        | M         |
|                   | 74          | 21058          | no     | 21071        | -         |
|                   | 75          | 26486          | no     | 26523        | M         |
|                   | 63          | 5785           | no     | 5859         | -         |
|                   | 68          | 4580           | no     | 4590         | -         |
|                   |             |                |        |              |           |
| Shared by monkeys | 58          | 26917          | yes    | 27202        | ORF6      |
|                   | 69          | 19112          | no     | 19148        | -         |
|                   | 70          | 14372          | no     | 14381        | -         |
|                   | 62          | 3808           | no     | 3813         | -         |
|                   | 63          | 23922          | no     | 24051        | -         |
|                   | 67          | 22503          | no     | 22614        | -         |
|                   | 58          | 29871          | -      | -            | -         |



| 20_leader_seq         | TRS_seq              | first_orf_aa                       |
|-----------------------|----------------------|------------------------------------|
| AAACCAACCAACTTTGATC   | TCTTCTAGAGTTCCTGATC  | MADSNGTITVEELKKLLEQWNLVIGFLFTW     |
| AGATCTGTTCTCTAAACGAA  | CCTAAGACTAAAA        | MLQKKMTLKRVSFTFVGLYNKS*            |
| GATCTGTTCTCTAAACGAAC  | TATATTAGTTTTTCTGTTTG | MADSNGTITVEELKKLLEQWNLVIGFLFTW     |
| CGATCTCTTGATAGATCTGTT | TTCTAAAGAAACTTTGTAT  | MFSTKKTVTQQP*                      |
| TCTTGATAGATCTGTTCTCTA | AACGATCTAA           | MKLLQCHLAM*                        |
|                       |                      |                                    |
| ACTTTGATCTCTTGATAGAT  | CGCTTCTAGAAAGTGAAC   | MFHLVDFQVTIAEILLIIMRTFKVSIWNLDYIII |
| CTTGATAGATCTGTTCTCTAA | ACAAAGCTTATAAAATAGA  | MPHILTNSQM VYAYFGIAMSIDILLIPLFVDL  |
| TTGATAGATCTGTTCTCTAAA | CAAACCTTA            | MFYSLQCShLQVLDH*                   |
| TCGATCTCTTGATAGATCTGT | TCTCT                | MTNLFQAFWK*                        |
| CGATCTCTTGATAGATCTGTT | AAATTTACAAAACACCACC  | MLASSNNMVIALVILLET SFVHKSLTALLFCF  |
| CTCTTGATAGATCTGTTCTCT | AAACTTCTAACTTTAGAGT  | MLGTGRESATVLLIILSYIIPHHFPLLSVMECLL |
| -                     | -                    | -                                  |

'ICLLQFAYANRRNFLYIIKLIFLWLLWPVTLACFVLAAYRINWITGGIAIAMAACLVGLMWLSYFIASFRLFARTF

'ICLLQFAYANRRNFLYIIKLIFLWLLWPVTLACFVLAAYRINWITGGIAIAMAACLVGLMWLSYFIASFRLFARTF

NLIKNLSKSLTENKYSQLDEEQPMEID\*

TLECYLTLTCLVVMVAVCM\*

HLCSQMK\*

.LN\*

SMWSFNPETNILLNVPLHGTILTRP LLESELVIGAVILRGHLRIAGHHLGRCDIKDLPKEITVATSRTLSYYKLGA

SMWSFNPETNILLNVPLHGTILTRP LLESELVIGAVILRGHLRIAGHHLGRCDIKDLPKEITVATSRTLSYYKLGA

SQRVAGDSGFAAYSRYRIGNYKLNTDHSSSSDNIALLVQ\*

SQRVAGDSGFAAYSRYRIGNYKLNTDHSSSSDNIALLVQ\*

A

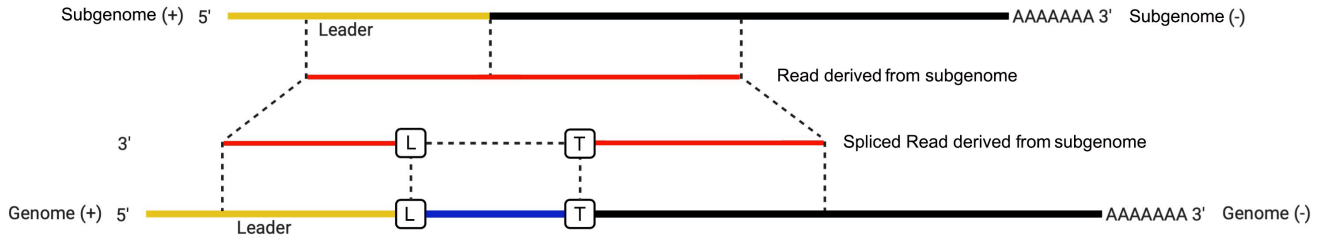

B

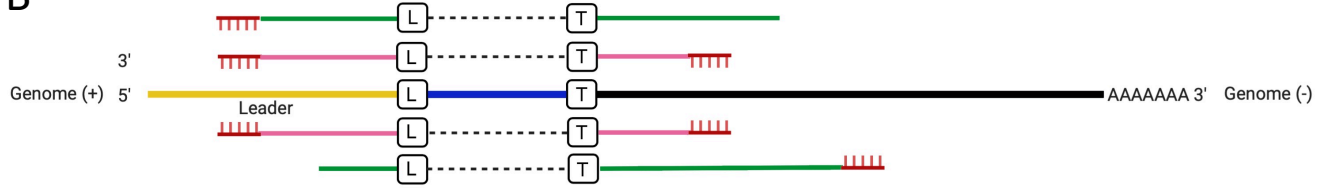

C

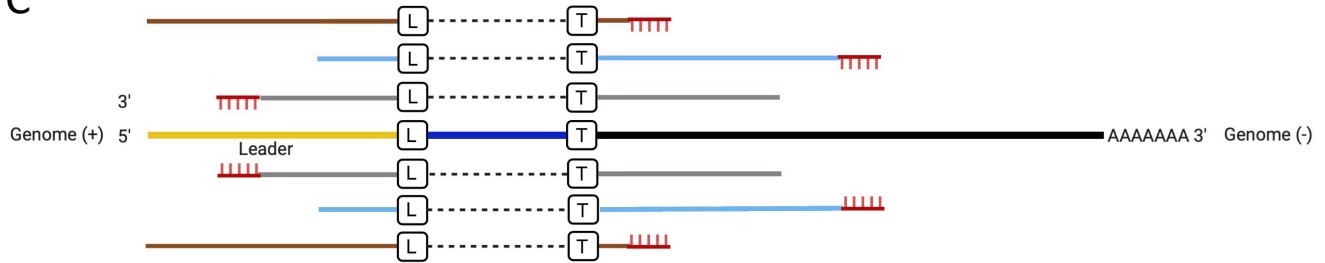

D

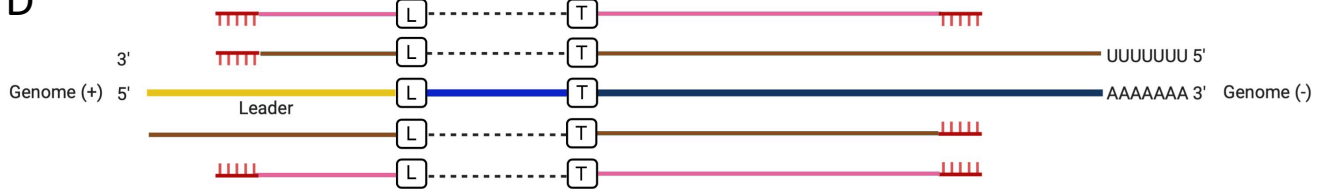

E

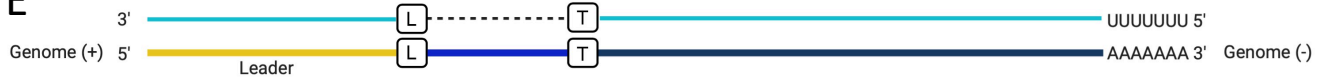

Figure 1

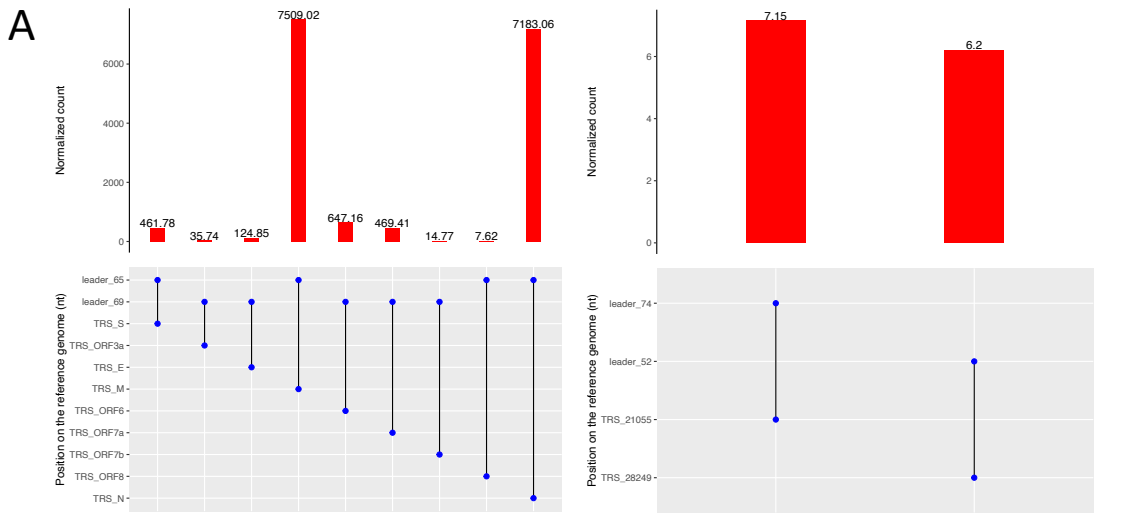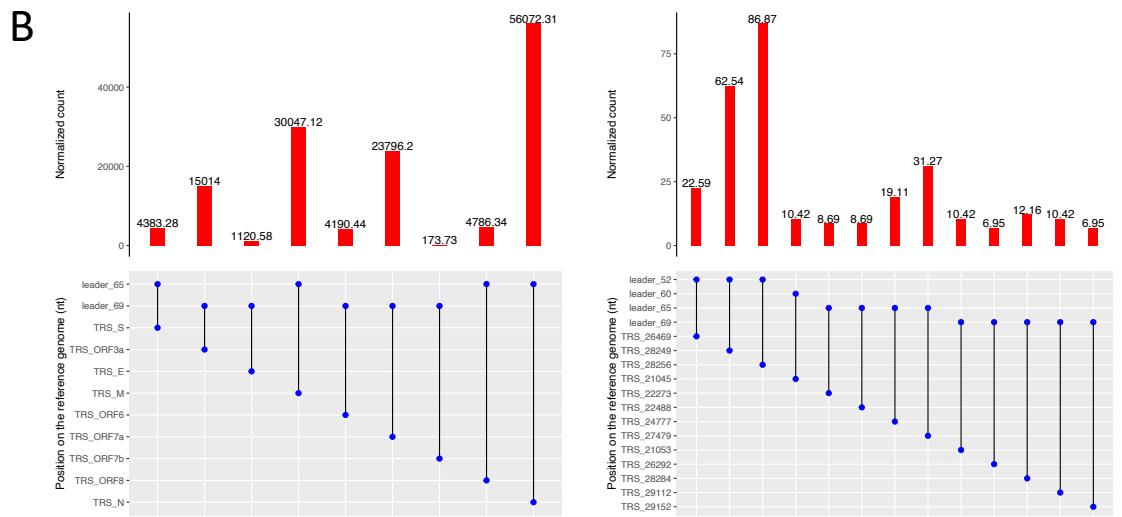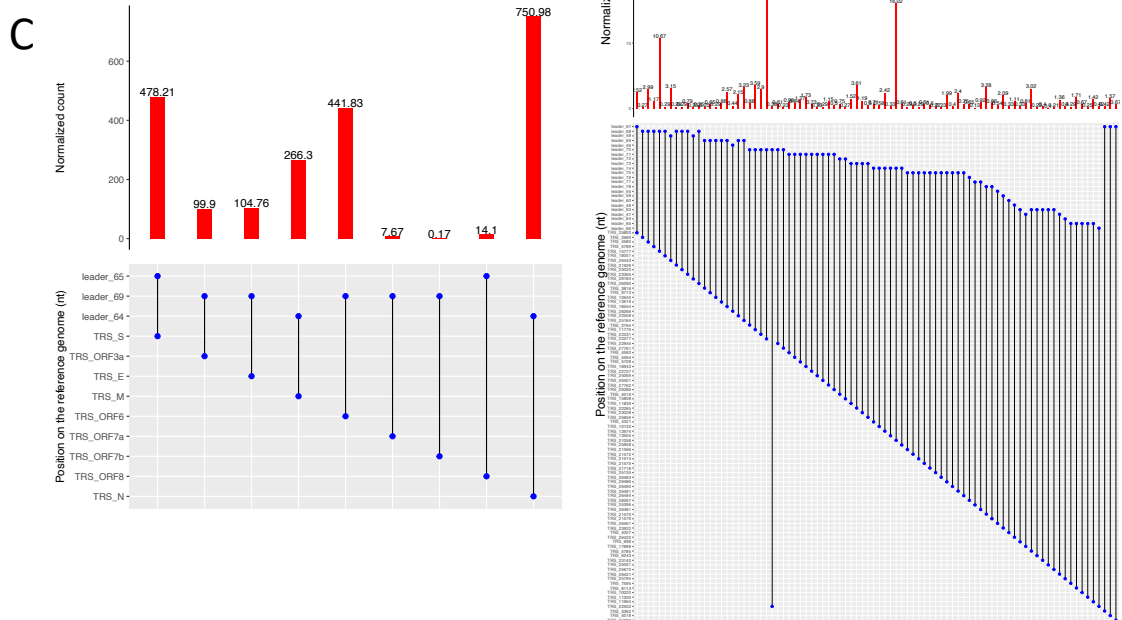

Figure 2

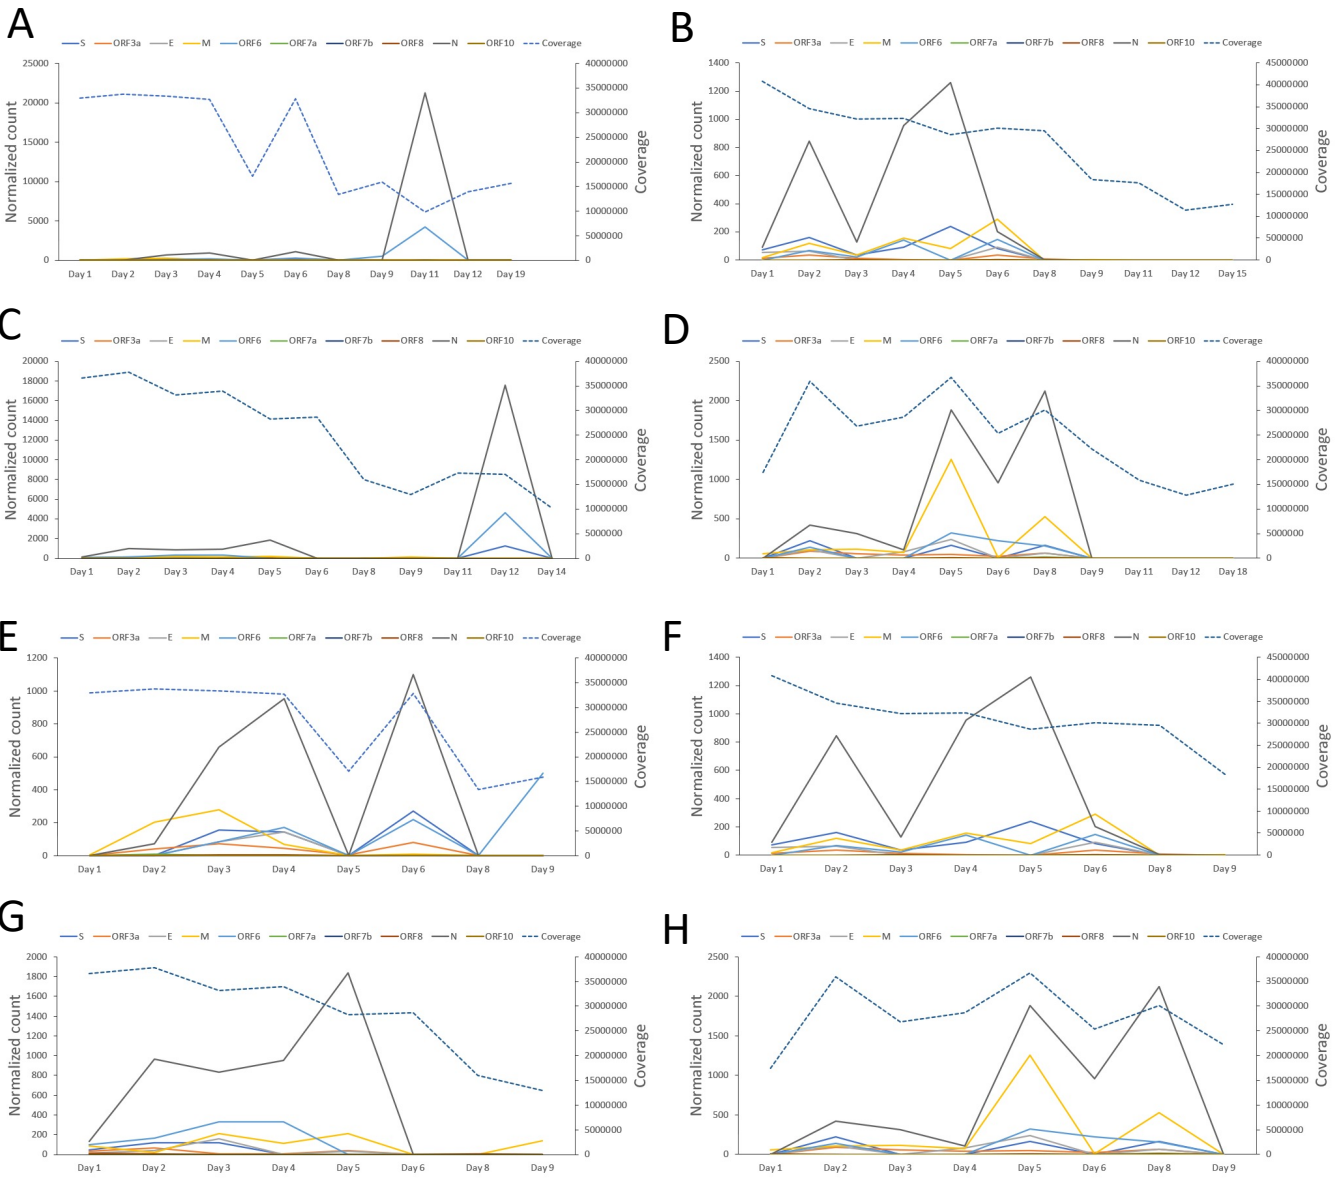

Figure 3

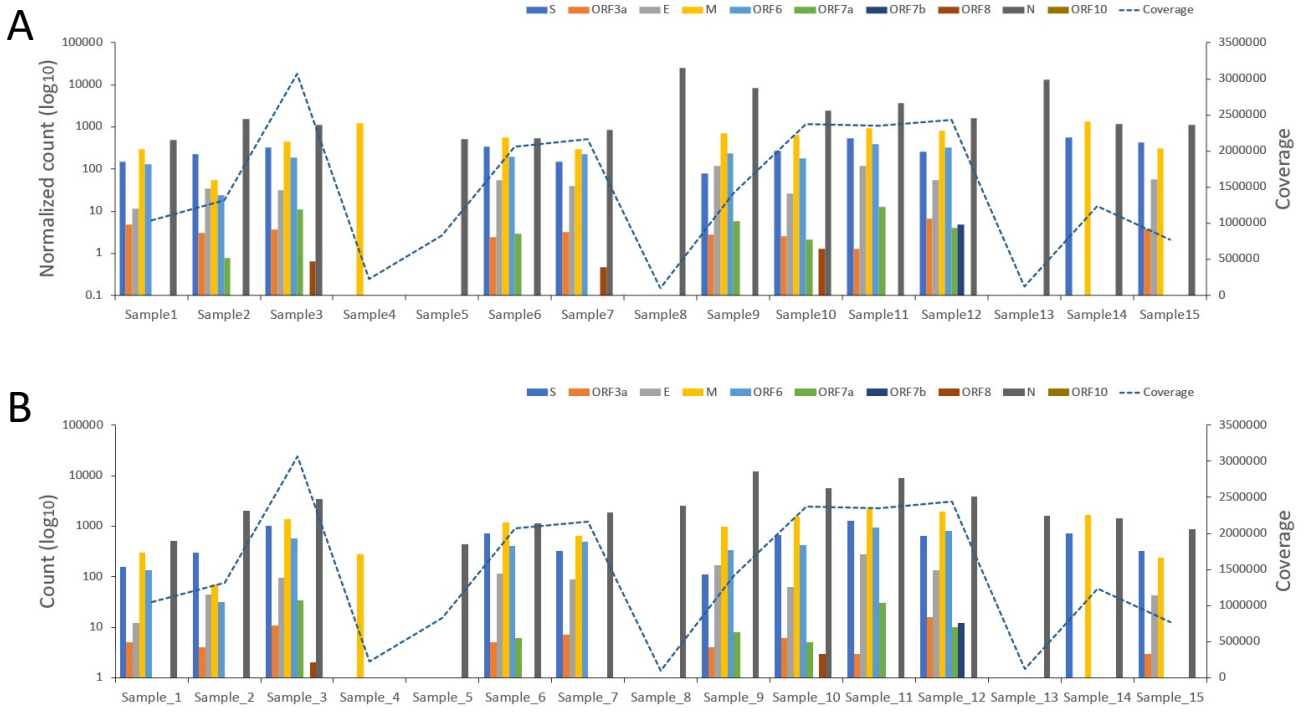

Figure 4



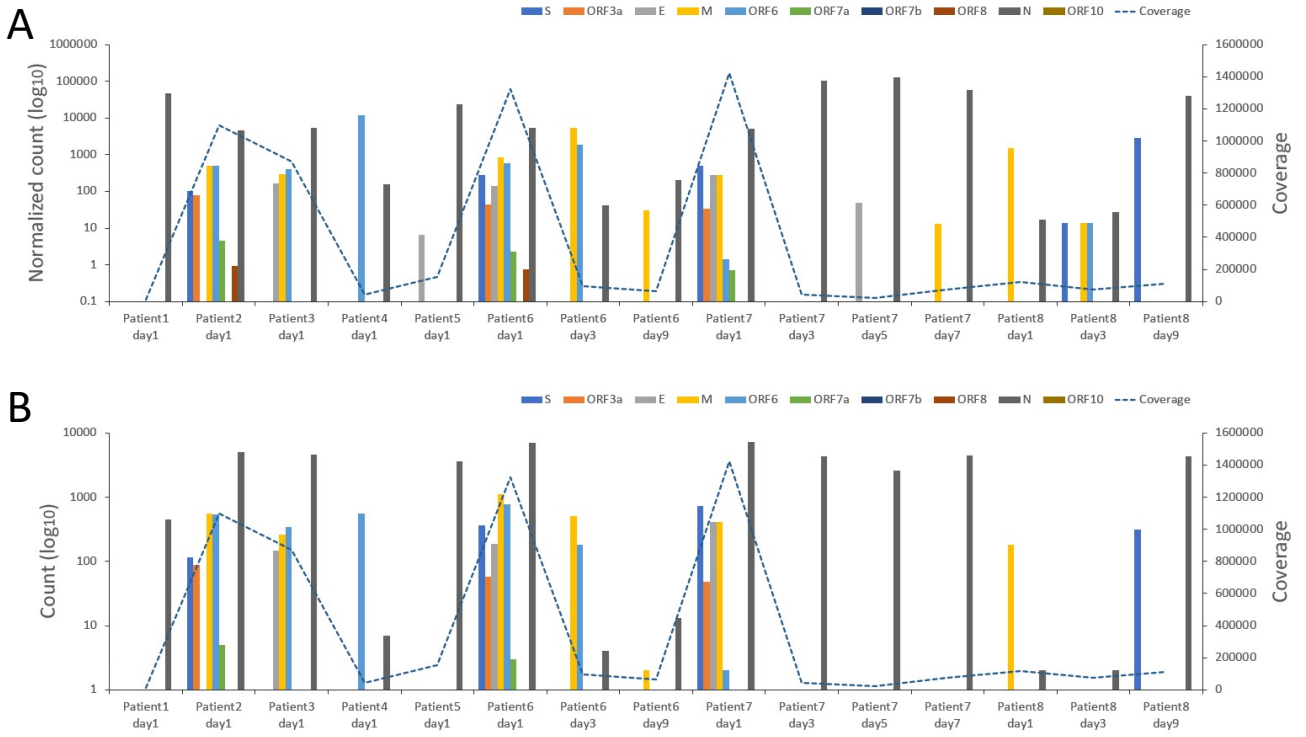

Figure 5



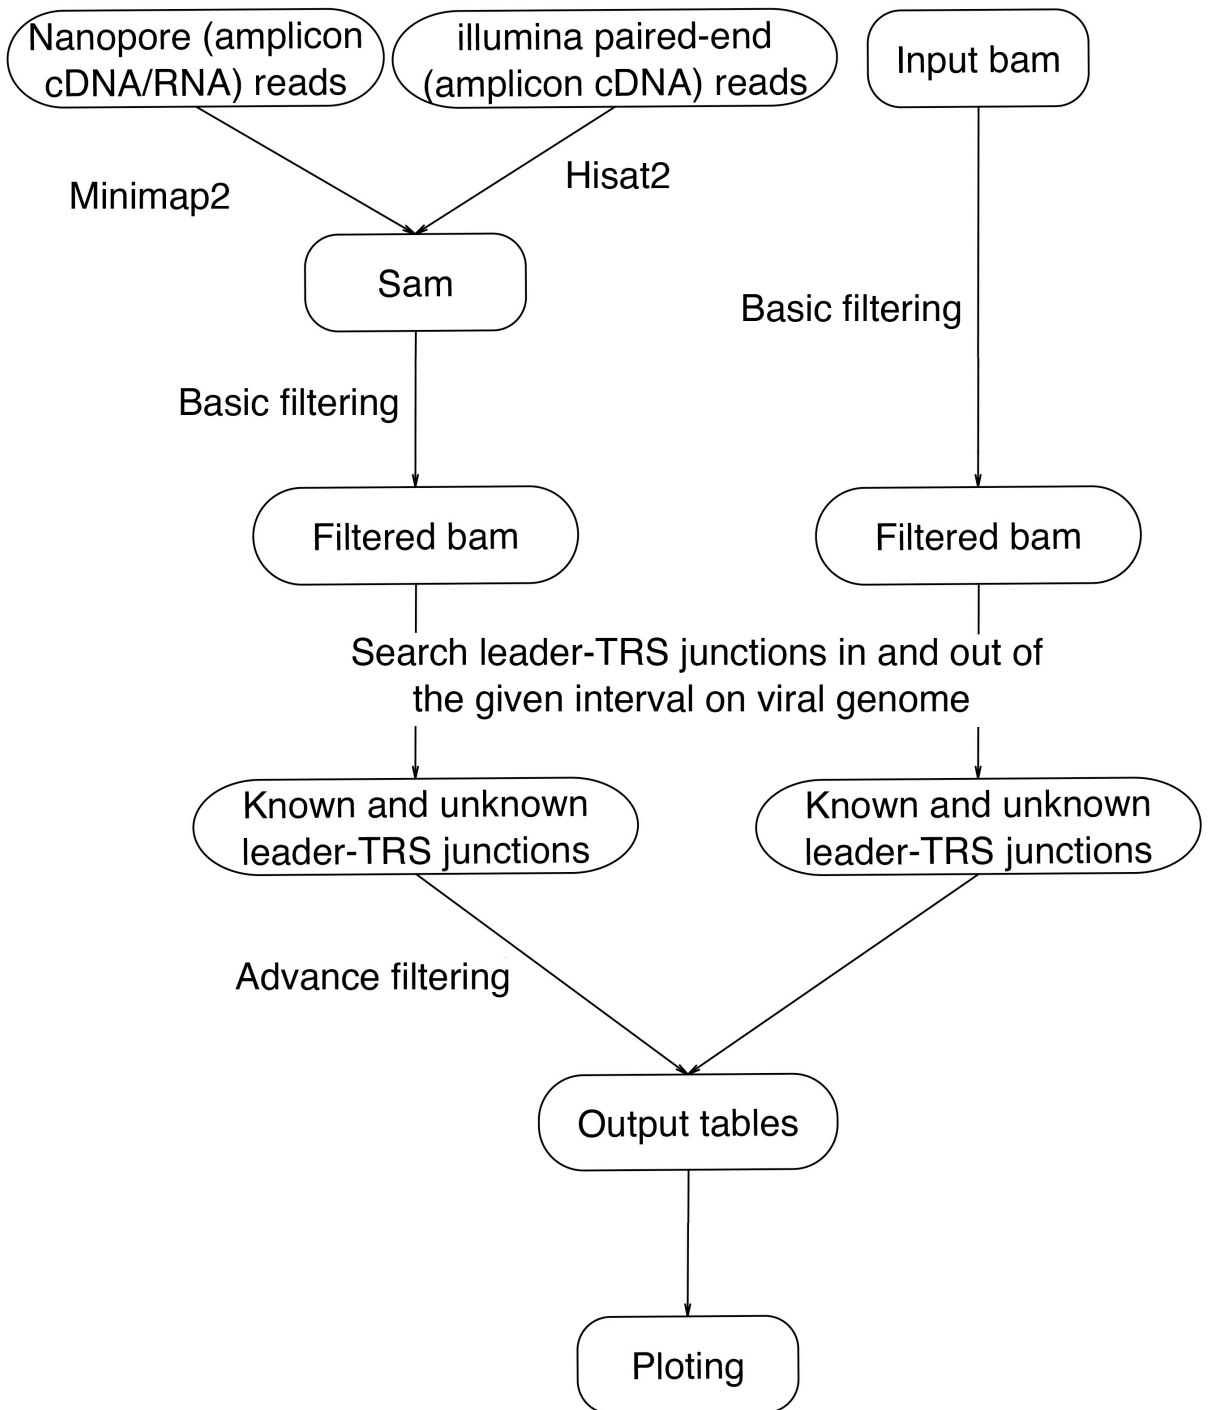

Supplementary Figure 1

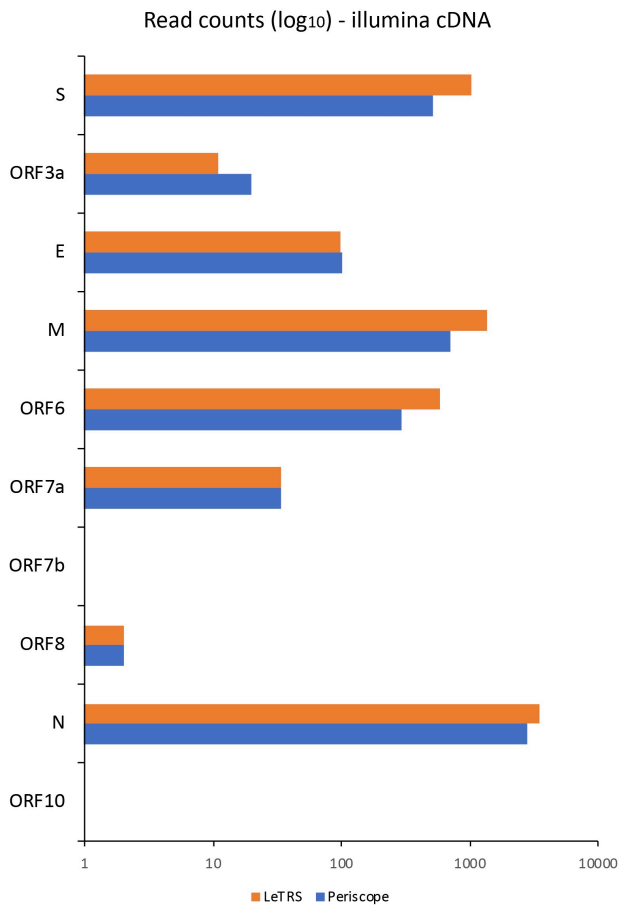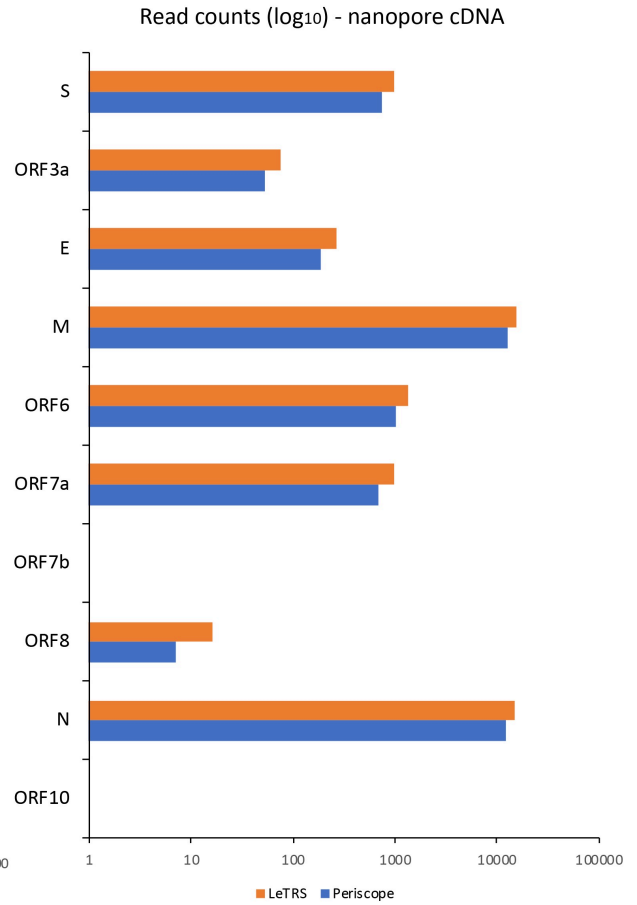

Supplementary Figure 2

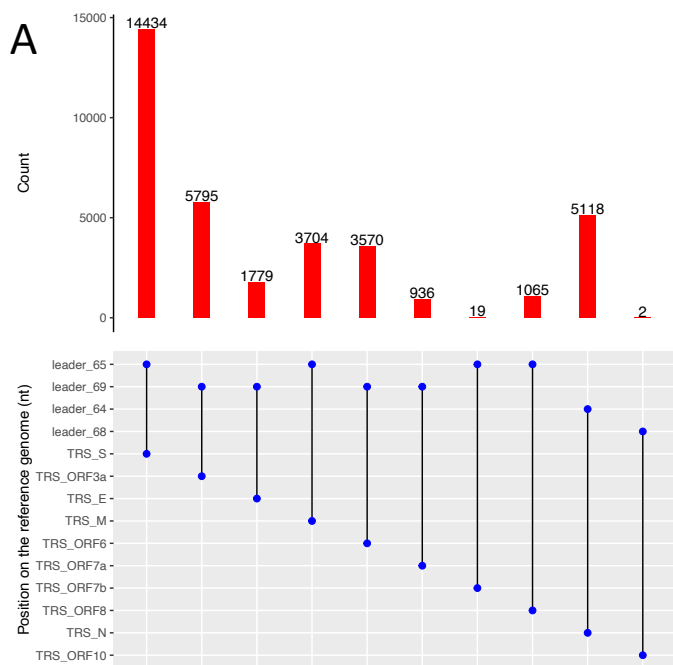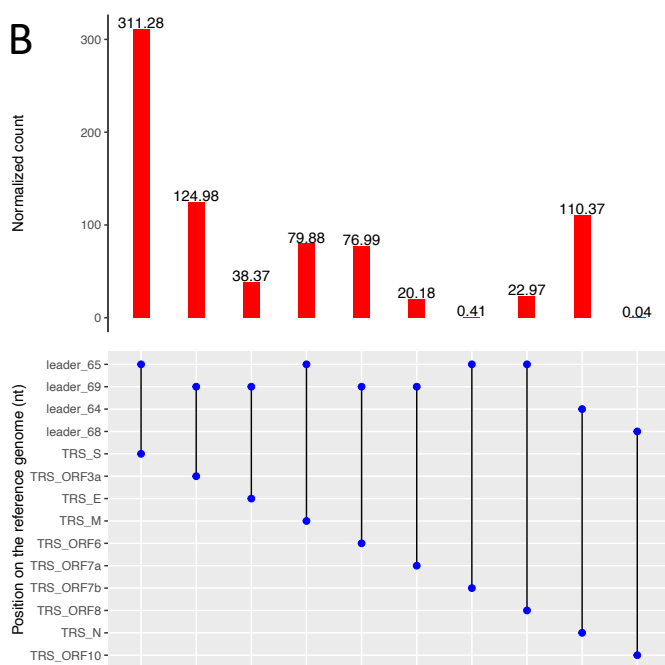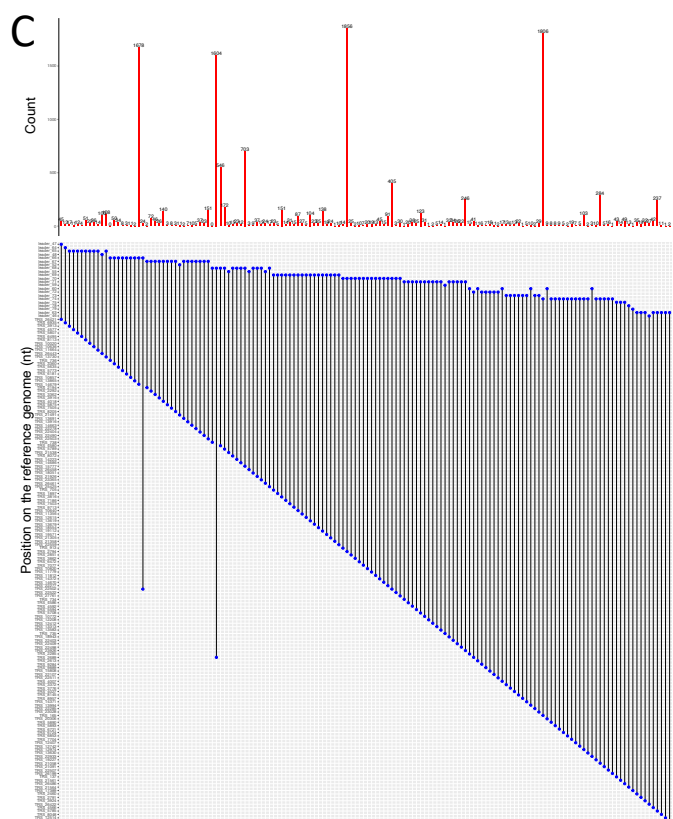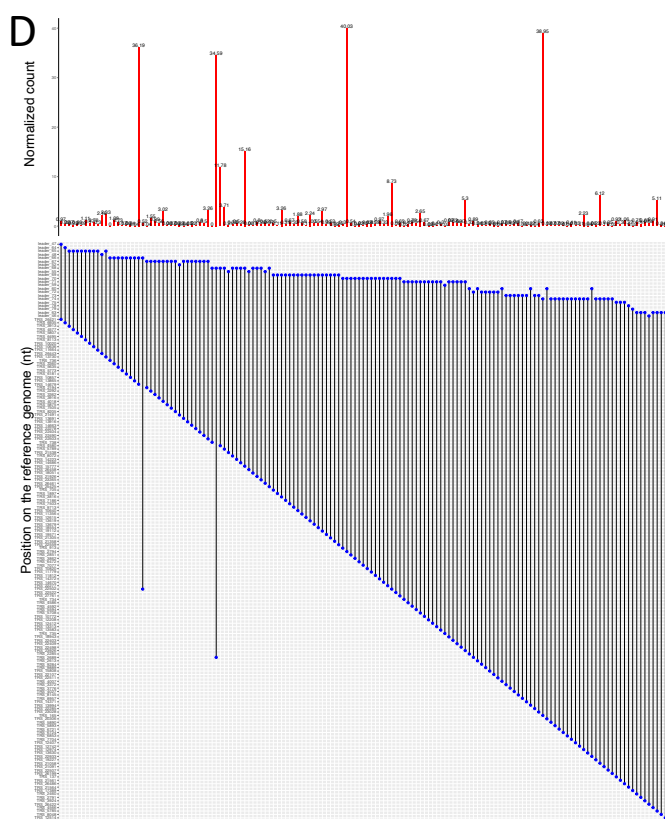

Supplementary Figure 3

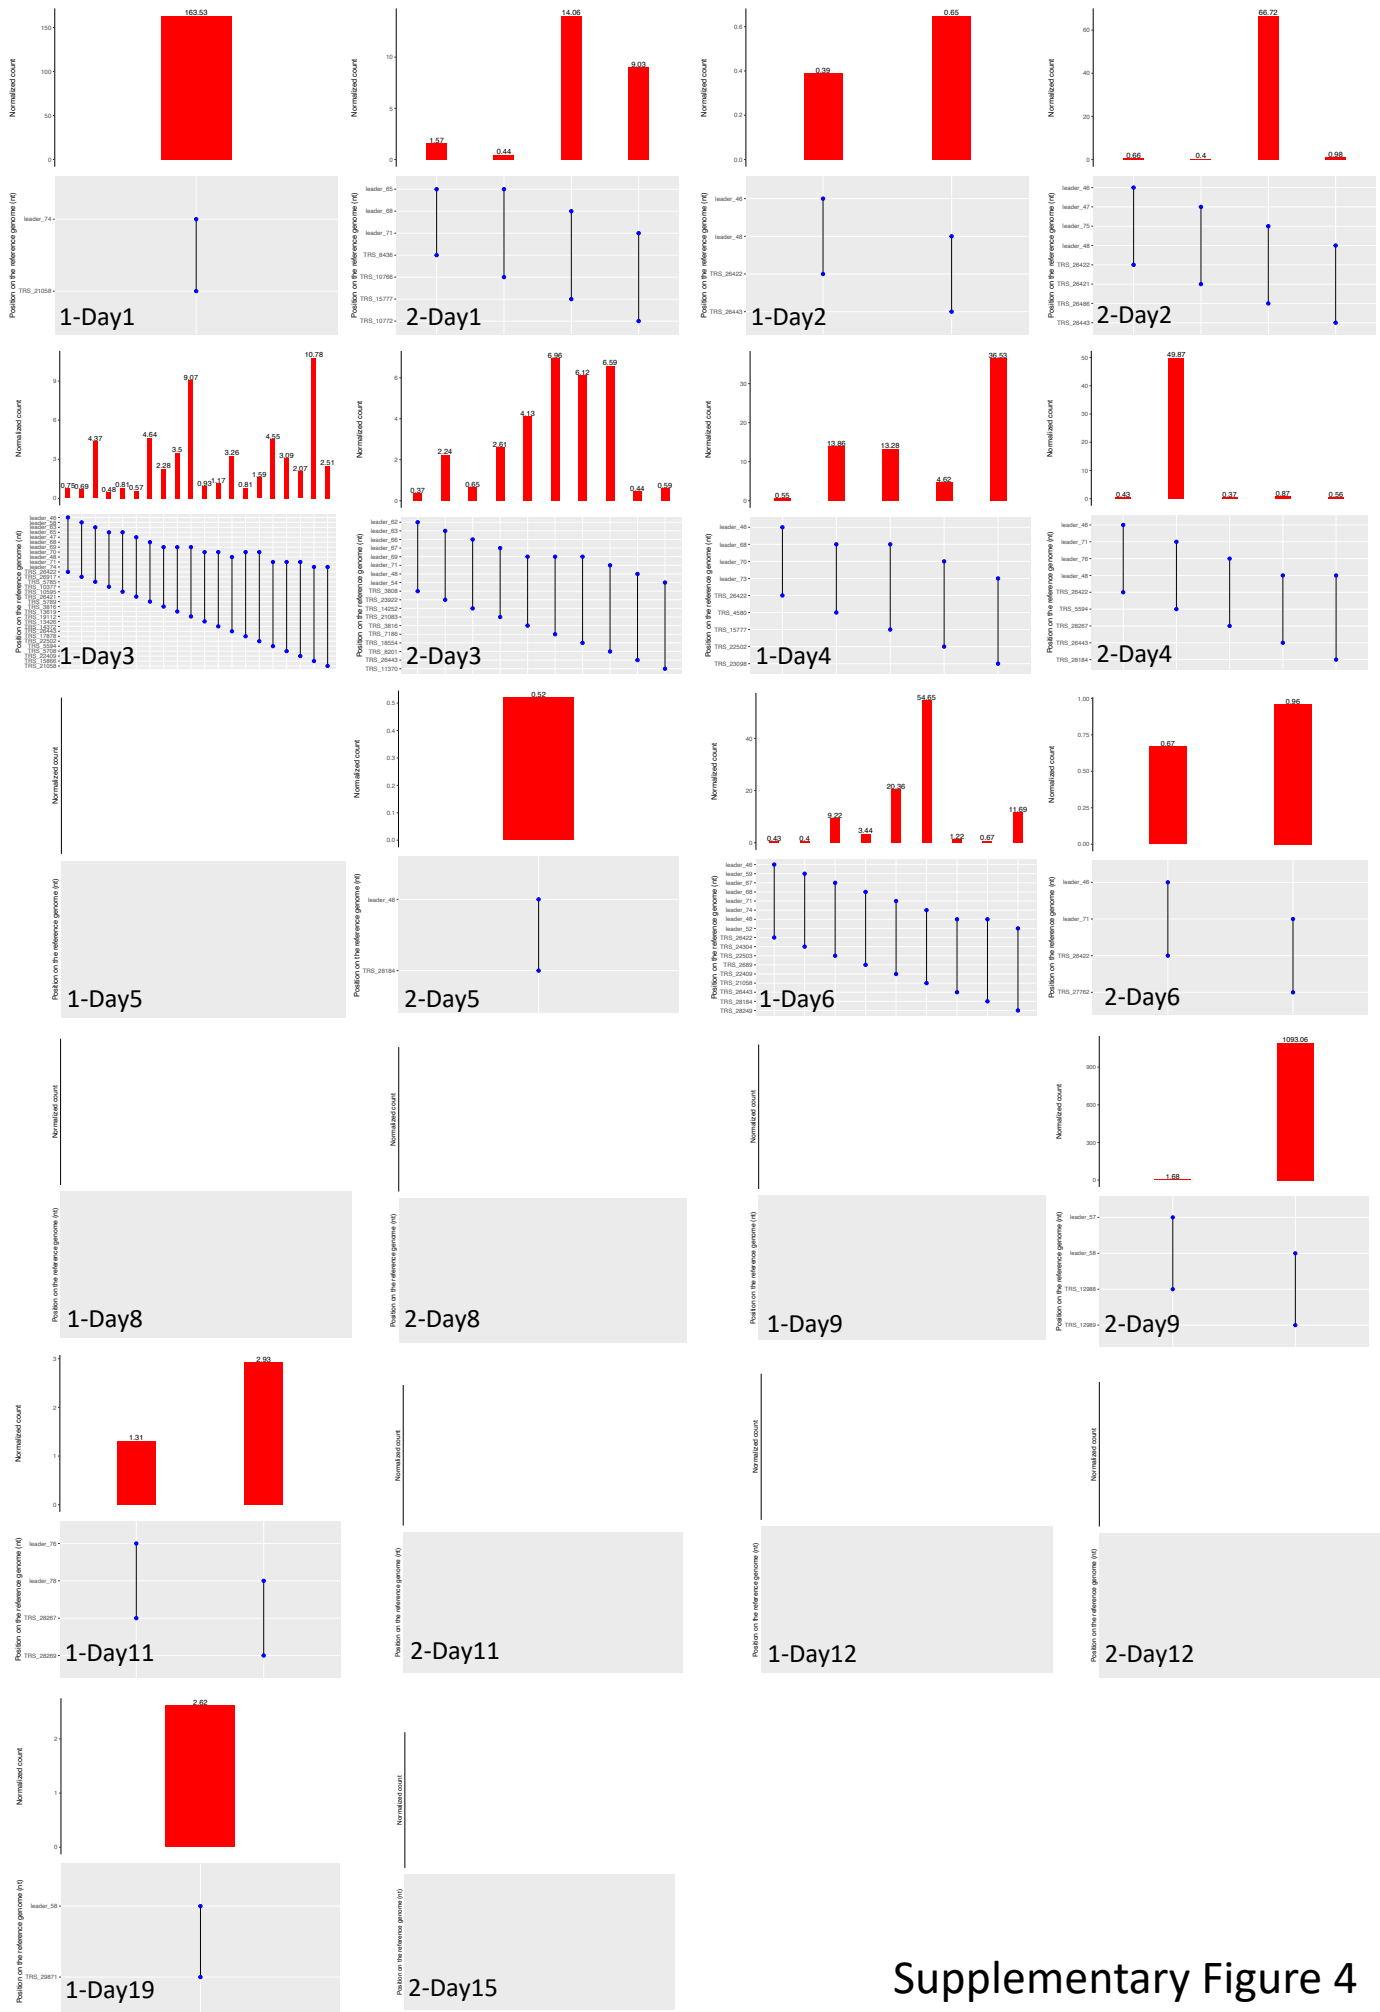

Supplementary Figure 4

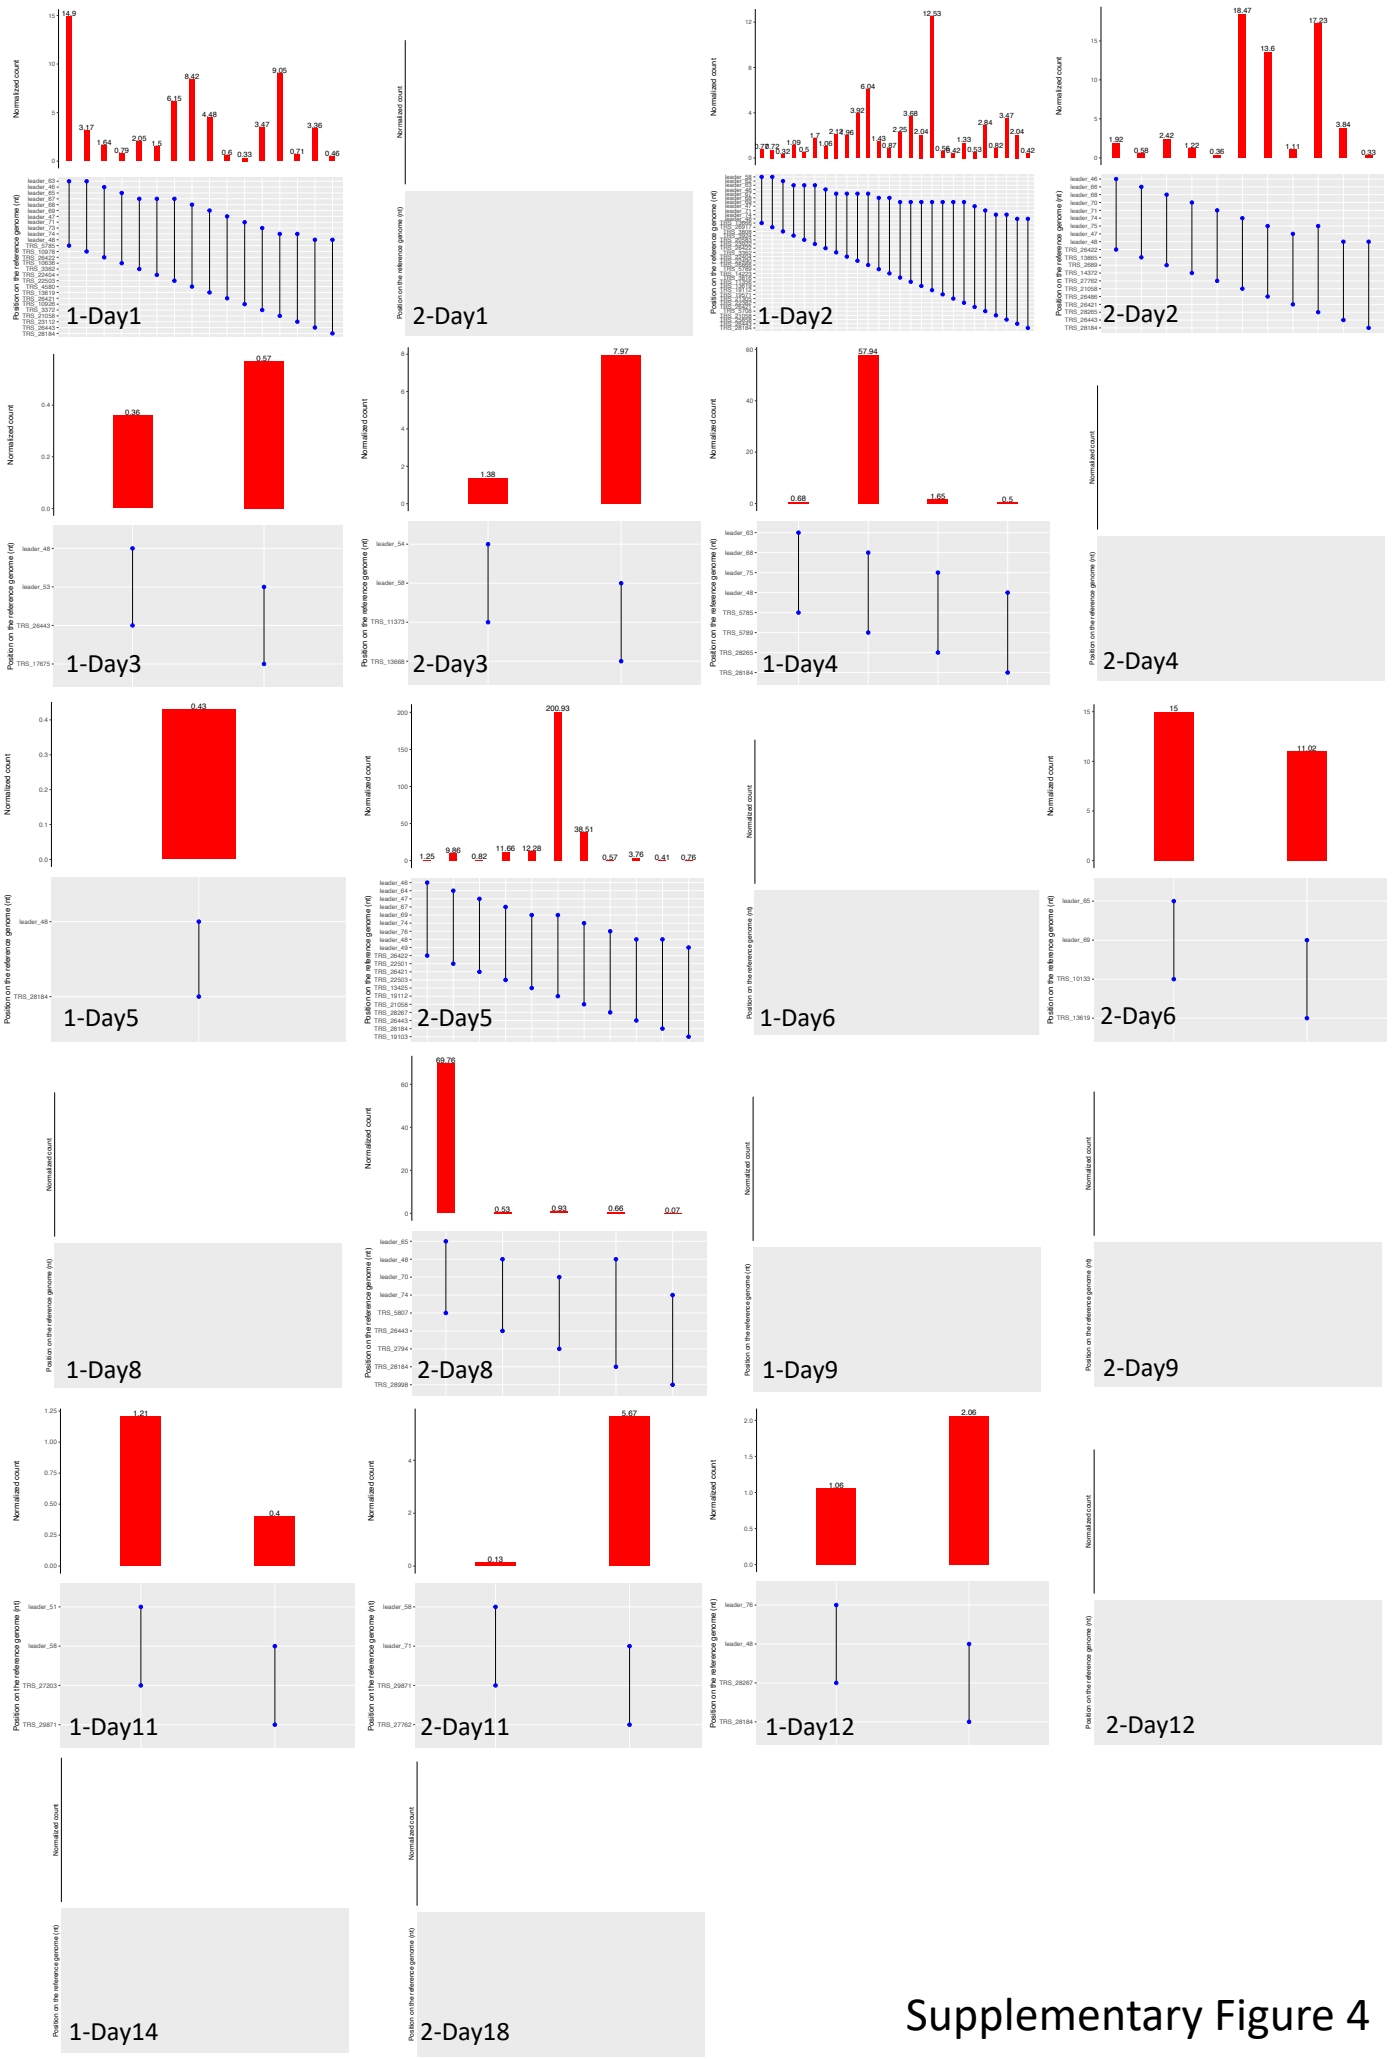

Supplementary Figure 4

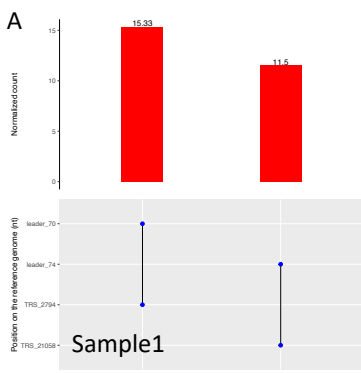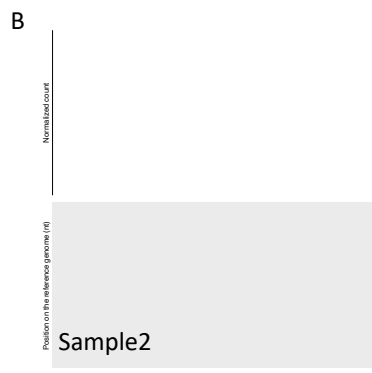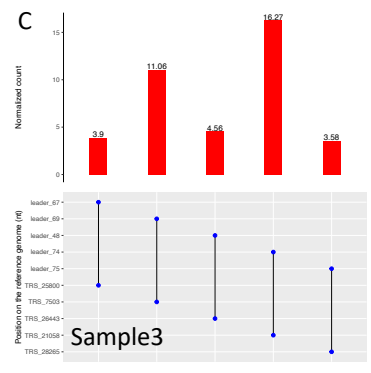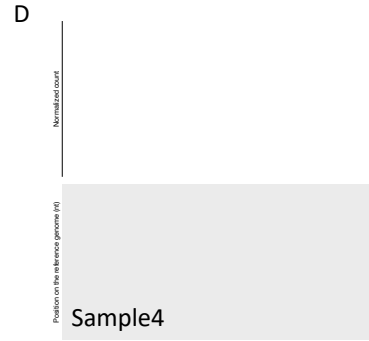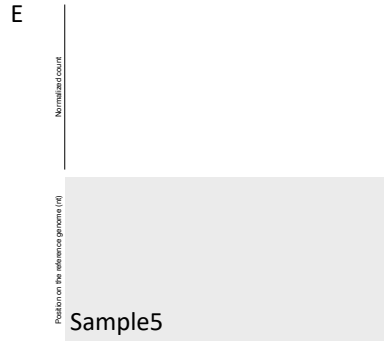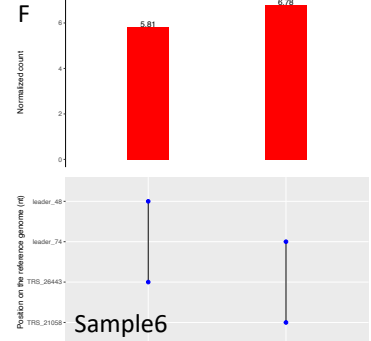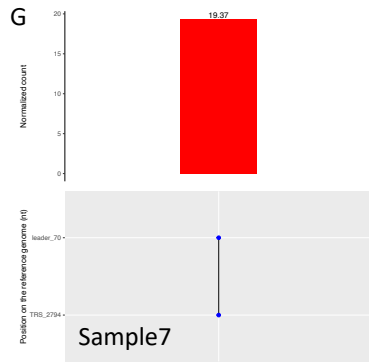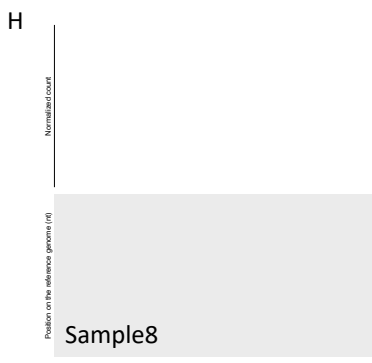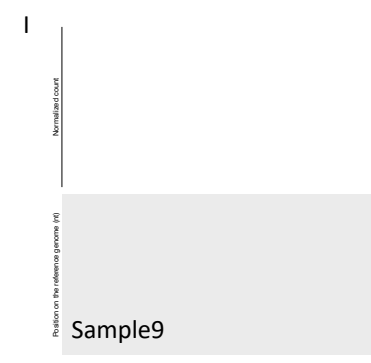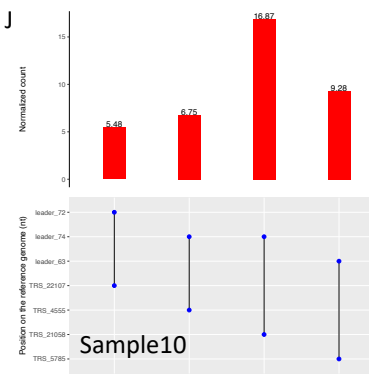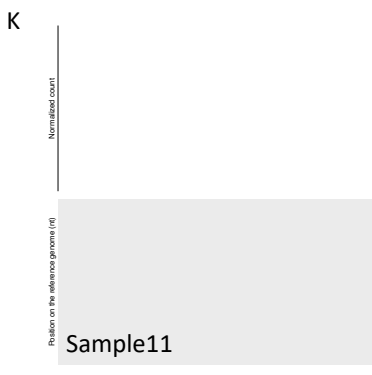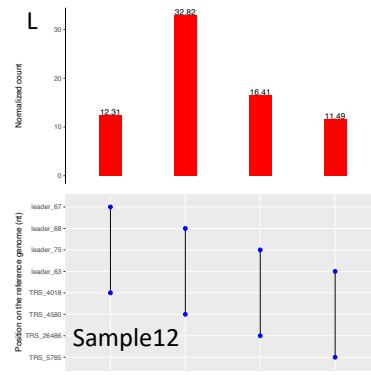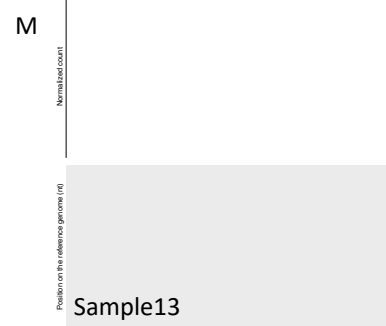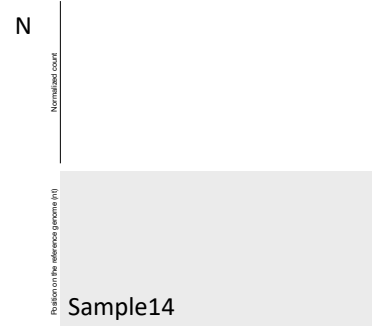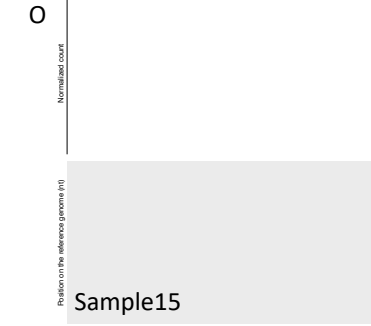

Supplementary Figure 5



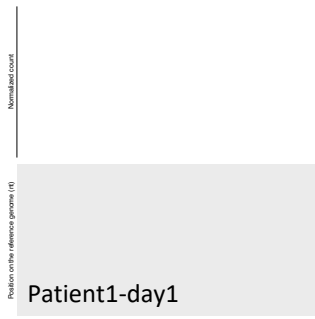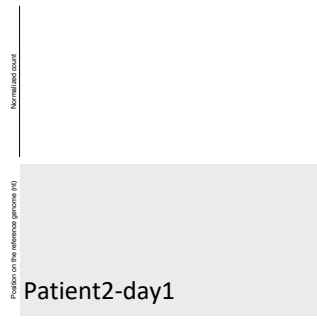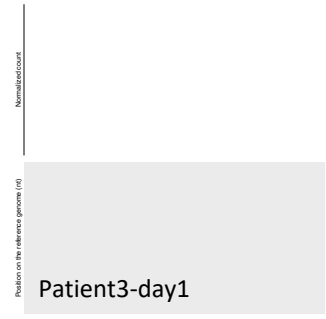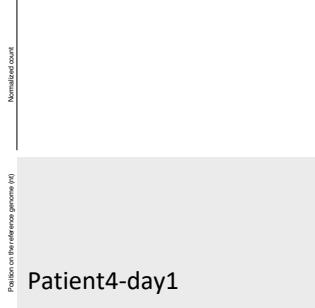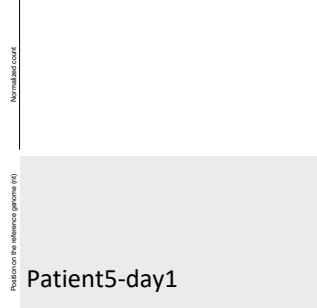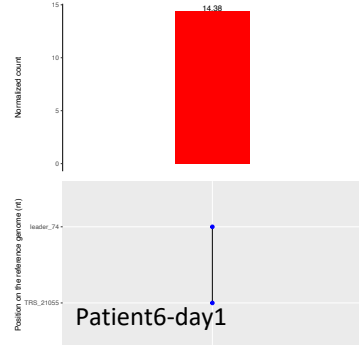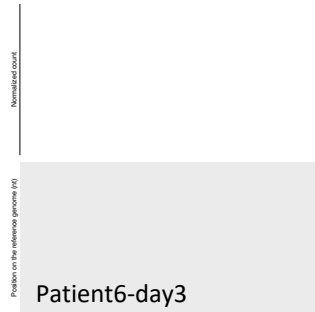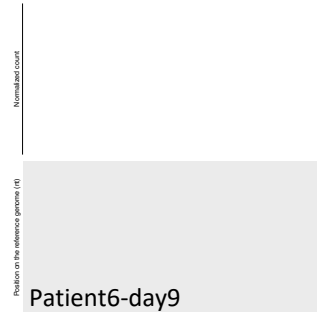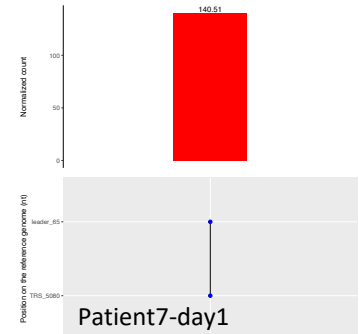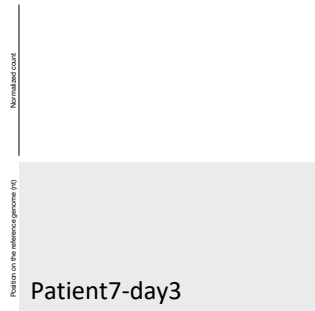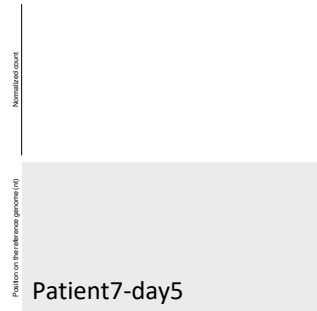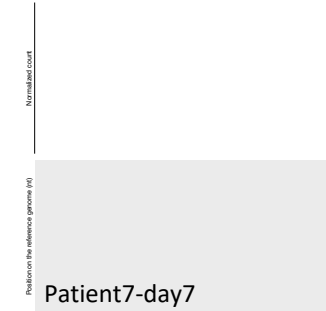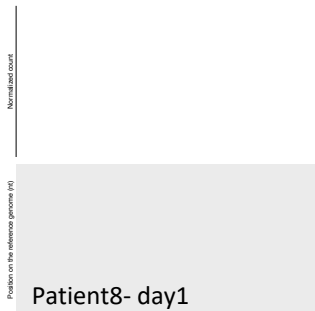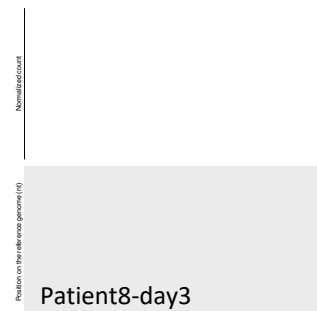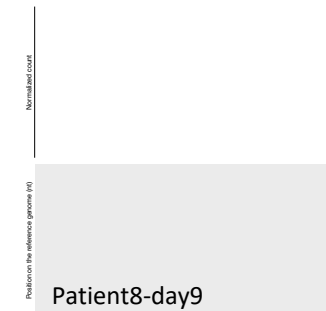

Supplementary Figure 6

**Prof. Julian A. Hiscox**

**Chair in Infection and Global Health**

**Deputy Executive Dean**

The University of Liverpool  
Institute of Infection, Veterinary and Ecological  
Sciences  
Liverpool Science Park IC2  
146 Brownlow Hill  
Liverpool  
L3 5RF

**Tel:** +44 (0)7812238359.  
**Email:** [julian.hiscox@liverpool.ac.uk](mailto:julian.hiscox@liverpool.ac.uk)  
**Assistant:** [judson@liverpool.ac.uk](mailto:judson@liverpool.ac.uk)

11 May 2021

Dear GigaScience,

Please find our submission 'Identification and quantification of SARS-CoV-2 leader subgenomic mRNA gene junctions in nasopharyngeal samples shows phasic transcription in animal models of COVID-19 and dysregulation at later time points that can also be identified in humans' for consideration for publication in your journal. We have developed a bioinformatics tool, LeTRS, that can interrogate any type of sequencing data and identify the unique features of SARS-CoV-2 subgenomic mRNAs (sgmRNAs). This is important because coronavirus sgmRNAs are only produced during infection. What tends to be forgotten is that their presence in a clinical sample can indicate active virus RNA synthesis and the presence of infected cells and not just the presence of virions. Also, the sgmRNAs are targets for the majority of nucleic acid diagnostics used in COVID-19. Therefore, their ratios can dramatically alter the interpretation of these results and the subsequent use of Ct values in building models of SARS-CoV-2 transmission.

The tool is computationally optimized and allows rapid analysis of very large datasets and presents a big step change as global sequencing databases can be used to track sgmRNAs and how these may change with the emergence of variants with different pathogenic properties. We think the tool can be used by many different research groups when analyzing their own local or global datasets. The tool can be very simply adapted to study sequencing data from other coronaviruses such as MERS-coronavirus that is continuously emerging in the Middle East.

Our manuscript isn't just about an informatics tool, we use it to study the pattern of sgmRNA synthesis over the natural course of infection in two non-human primate models that we recently have established to study COVID-19. Human challenge models are just starting, and unlikely to recapitulate disease, due to the infectious doses used. Thus, we provide unique insight that SARS-CoV-2 infection is phasic and that the pattern of sgmRNA abundance becomes dysregulated towards the end of infection. Analysis of similar longitudinal samples from humans also suggests the same pattern – again indicating that the interpretation of diagnostic Cts can be influenced by the time of infection and the presence of infected cells in the sample.

Yours sincerely,



Prof. Julian A. Hiscox.
